# Supplementary material for: Correia Repeat Enclosed Elements and Non-Coding RNAs in the Neisseria Species
Source: Microorganisms. 2016 Aug 25;4(3):31. doi: 10.3390/microorganisms4030031 (PMC5039591; doi:10.3390/microorganisms4030031)
Supplement: Supplementary file 1 [file microorganisms-04-00031-s001.xlsx]

## Sheet: ST 1 NCCP11945 ncRNAs
Table S1. SIPHT predicted small non-coding RNAs in Neisseria gonorrhoeae strain NCCP11945.
Guide for interpreting SIPHT output
Locus Name	|	UpGENEnumber		UpGENEname		UpGENEdirection	distUpGENE	|	sRNAstart	end	dirsRNA	lensRNA	|	distDnGENE	DnGENEdir.	DnGENEnumber	DnGENEname		sRNAtype	BLASTscore	BLASTexpect	TermType	NumSearchesPredicted	BLASTpartner	QRNA?	homology to known sRNAs	Num paralogues	Weaker rev paralogue?	Paralogous candidates	Conserved synteny with knowns	Potential UTR?	Riboswitch?	Putative TFBSs
Names for loci followed by accession number of replicon. Loci that do not correspond to known ncRNAs will include the prefix 'Candidate'. Names for loci that do correspond to known ncRNAs will include the name of the known ncRNA.	|	NCBI assigned number for gene (from .gff annotation)		NCBI assigned name for gene (from .gff annotation). Longer gene names are truncated		Strand orientation of Upstream gene	# of bp between 3' boundary of Upstream gene and 5' boundary of predicted locus	|	Coordinate position of the beginning of the locus. For loci on the + strand, this corresponds to the 3' end of the putative terminator; for those on the - strand this is an estimation based on 5' end of conservation.	Coordinate position of the end of the locus. For loci on the + strand, this is an estimation based on 5' end of conservation; for those on the - strand this corresponds to the 3' end of the putative terminator.	Strand orientation of locus	Predicted length of sRNA based on the distance between 5' end of conservation and 3' end of puative terminator. NOTE: this prediction is often significantly different than the observed size as conservation may continue beyond the boundary or cover only a portion of the locus.	|	# of bp between 3' boundary of predicted locus and 5' boundary of downstream gene	Strand orientation of downstream gene	NCBI assigned name for gene (from .gff annotation). Longer gene names are truncated	NCBI assigned number for gene (from .gff annotation)		If not previously annotated=candidate. If previously annotated=name of known	BLAST score of intergenic conservation. If conservation was found in multiple replicons, this number corresponds to the highest score among these HSPs.	BLAST expect value of intergenic conservation. If conservation was found in multiple replicons, this number corresponds to the lowest E among these HSPs.	Program(s) that identified associated terminator. T=TransTerm, F=FindTerm, R=RNAMotif, B=T+R, X=F+R, Y=F+T, Z=all three programs.	The number of partner replicons in which intergenic sequence conservation was found.	The names of partner replicons in which intergenic sequence conservation was found.	QRNA designation. RNA=conserved secondary structure, COD=conserved coding sequence, -=neither.	Accession number_name of RNA_(strand orientation). If this is followed by (hom) the known locus is in a different replicon then the ROI. If followed by (hom|rev) the known locus is in a different replicon then the ROI and on the opposite strand. If followed by (tandem) it is in the same replicon and in the same IGR on the same strand but not in the same position as the candidate locus. If followe…	# predicted loci loci in the same replicon but in different IGR that share homology with candidate	WTA loci are denoted by W.	Accession number_name of paralogous candidate. If this is followed by (para) the paralogous locus is in a different IGR than the candidate. If this is followed by (tandem) the paralogous locus is in the same IGR as the candidate. If this is followed by (anti) the paralogous locus overlaps but is in the opposite orientation as the candidate. If this is followed by (opp) the paralogous locus is in …	Name_accession number of known RNA with which candidate shares synteny. If this is followed by 3'(0), only the genes directly 3' of the candidate and known loci share homology. If followed by UD, both upstream and downstream genes are homologous. UD is followed by 5'(x-y) where x is the relative position of the homologous gene upstream of the candidate and y is the relative poisiton of the homolo…	'5' dentoes 3' end of the predicted locus is < 30 bp upstream of annotated start of downstream gene on the same strand. '3' dentoes 3' end of the predicted locus is < 80 bp downstream of annotated end of upstream gene on the same strand.	Denoted by RS	Species from which consensus matrix was derived_transcription factor name_matrix number(patser score|distance between TFBS and putative terminator (in other words predicted length). If species=Multi, the consensus matrix was derived from experimentally determined regulons in multiple species (see Materials and Methods).
~
sRNAName	|	UpGENEnumber		UpGENEname		UpGENEdir.	distUpGENE	|	sRNAstart	end	dirsRNA	lensRNA	|	distDnGENE	DnGENEdir.	DnGENEnumber	DnGENEname		sRNAtype	BLASTscore	BLASTexpect	TermType	NumSearchesPredicted	BLASTpartner	QRNA?	homology to known sRNAs	Num paralogues	Weaker rev paralogue?	Paralogous candidates	Conserved synteny with knowns	Potential UTR?	Riboswitch?	Putative TFBSs
~
Candidate_1_NC_011035	|	NGK_0019		hypothetical_protein	*	<<<	1	|	13093	13357	>>>	264	|	-18	>>>	NGK_0020	hypothetical_protein	*	candidate	530	4.2e-18	R	5	Neisseria_gonorrhoeae_FA_1090_chromosome_<>Neisseria_meningitidis_Z2491_chromosome_<>Neisseria_meningitidis_FAM18_chromosome_<>Neisseria_meningitidis_053442_chromosome_<>Neisseria_meningitidis_alpha14_chromosome_	RNA	-	1		Candidate_771_NC_011035(para)	-	5	RS	-E.coli_sig70_3(7.91|-117)
Candidate_4_NC_011035	|	NGK_0208		hypothetical_protein	*	>>>	1	|	163822	163926	>>>	104	|	-6	>>>	NGK_0209	hypothetical_protein	*	candidate	475	5e-15	R	6	Neisseria_gonorrhoeae_FA_1090_chromosome_<>Neisseria_meningitidis_MC58_chromosome_<>Neisseria_meningitidis_Z2491_chromosome_<>Neisseria_meningitidis_FAM18_chromosome_<>Neisseria_meningitidis_053442_chromosome_<>Neisseria_meningitidis_alpha14_chromosome_	-	-	1		Candidate_771_NC_011035(para)	-	5	-	-E.coli_sig70_1(7.94|-33)
Candidate_5_NC_011035	|	NGK_0245		UPF0341_protein	*	<<<	1	|	191821	191893	>>>	72	|	25	<<<	NGK_0246	Rsp	*	candidate	445	1.3e-13	R	6	Neisseria_gonorrhoeae_FA_1090_chromosome_<>Neisseria_meningitidis_MC58_chromosome_<>Neisseria_meningitidis_Z2491_chromosome_<>Neisseria_meningitidis_FAM18_chromosome_<>Neisseria_meningitidis_053442_chromosome_<>Neisseria_meningitidis_alpha14_chromosome_	-	-	0	-	-	-	-	-	-
Candidate_6_NC_011035	|	NGK_0340		hypothetical_protein	*	>>>	1	|	281354	281525	>>>	171	|	-6	<<<	NGK_0341	peptide_chain_release_factor_3	*	candidate	639	6.2e-23	R	6	Neisseria_gonorrhoeae_FA_1090_chromosome_<>Neisseria_meningitidis_MC58_chromosome_<>Neisseria_meningitidis_Z2491_chromosome_<>Neisseria_meningitidis_FAM18_chromosome_<>Neisseria_meningitidis_053442_chromosome_<>Neisseria_meningitidis_alpha14_chromosome_	RNA	-	1		Candidate_771_NC_011035(para)	-	-	-	-
Candidate_7_NC_011035	|	NGK_0357		hypothetical_protein	*	<<<	1	|	295220	295345	>>>	125	|	-20	<<<	NGK_0358	inorganic_pyrophosphatase	*	candidate	485	1.9e-15	R	6	Neisseria_gonorrhoeae_FA_1090_chromosome_<>Neisseria_meningitidis_MC58_chromosome_<>Neisseria_meningitidis_Z2491_chromosome_<>Neisseria_meningitidis_FAM18_chromosome_<>Neisseria_meningitidis_053442_chromosome_<>Neisseria_meningitidis_alpha14_chromosome_	RNA	-	1		Candidate_771_NC_011035(para)	-	-	-	-
Candidate_8_NC_011035	|	NGK_0369		putative_DNA_ligase	*	<<<	1	|	308170	308299	>>>	129	|	2	<<<	NGK_0370	hypothetical_protein	*	candidate	665	1.1e-23	R	1	Neisseria_gonorrhoeae_FA_1090_chromosome_	RNA	-	0	-	-	-	-	-	-
Candidate_9_NC_011035	|	NGK_0393		transcription_antitermination_protein_NusB	*	<<<	1	|	323968	324050	>>>	82	|	-7	<<<	NGK_0394	6,7-dimethyl-8-ribityllumazine_synthase	*	candidate	367	5.7e-10	R	6	Neisseria_gonorrhoeae_FA_1090_chromosome_<>Neisseria_meningitidis_MC58_chromosome_<>Neisseria_meningitidis_Z2491_chromosome_<>Neisseria_meningitidis_FAM18_chromosome_<>Neisseria_meningitidis_053442_chromosome_<>Neisseria_meningitidis_alpha14_chromosome_	-	-	1		Candidate_771_NC_011035(para)	-	-	-	-
Candidate_10_NC_011035	|	NGK_0417		hypothetical_protein	*	>>>	44	|	342779	342862	>>>	83	|	-46	>>>	NGK_0418	tryptophan_synthase_subunit_beta	*	candidate	131	7.2e-07	R	6	Neisseria_gonorrhoeae_FA_1090_chromosome_<>Neisseria_meningitidis_MC58_chromosome_<>Neisseria_meningitidis_Z2491_chromosome_<>Neisseria_meningitidis_FAM18_chromosome_<>Neisseria_meningitidis_053442_chromosome_<>Neisseria_meningitidis_alpha14_chromosome_	-	-	1		Candidate_771_NC_011035(para)	-	5	-	-
Candidate_11_NC_011035	|	NGK_0480		putative_D-alanyl-D-alanine-endopeptidase	*	<<<	13	|	396692	396789	>>>	97	|	209	>>>	NGK_0481	Bacterioferritin_comigratory_protein	*	candidate	1504	6.3e-62	R	5	Neisseria_gonorrhoeae_FA_1090_chromosome_<>Neisseria_meningitidis_MC58_chromosome_<>Neisseria_meningitidis_Z2491_chromosome_<>Neisseria_meningitidis_FAM18_chromosome_<>Neisseria_meningitidis_053442_chromosome_	RNA	-	1		Candidate_739_NC_011035(tandem)	-	-	-	-
Candidate_12_NC_011035	|	NGK_0486		putative_reductase	*	<<<	13	|	400373	400470	>>>	97	|	-3	>>>	NGK_0487	phosphoribosylaminoimidazole-succinocarboxamide_sy	*	candidate	480	1.7e-15	R	5	Neisseria_gonorrhoeae_FA_1090_chromosome_<>Neisseria_meningitidis_MC58_chromosome_<>Neisseria_meningitidis_Z2491_chromosome_<>Neisseria_meningitidis_053442_chromosome_<>Neisseria_meningitidis_alpha14_chromosome_	-	-	1		Candidate_771_NC_011035(para)	-	5	-	-E.coli_sig70_1(7.56|-44)
Candidate_13_NC_011035	|	NGK_0534		putative_peptidyl-prolyl_cis-trans_isomerase_B	*	<<<	2	|	442656	442763	>>>	107	|	9	<<<	NGK_0535	putative_transport_protein	*	candidate	563	5.2e-19	R	6	Neisseria_gonorrhoeae_FA_1090_chromosome_<>Neisseria_meningitidis_MC58_chromosome_<>Neisseria_meningitidis_Z2491_chromosome_<>Neisseria_meningitidis_FAM18_chromosome_<>Neisseria_meningitidis_053442_chromosome_<>Neisseria_meningitidis_alpha14_chromosome_	RNA	-	0	-	-	-	-	-	-
Candidate_14_NC_011035	|	NGK_0645		hypothetical_protein	*	>>>	29	|	532687	532829	>>>	142	|	518	<<<	NGK_0646	putative_phage_associated_protein	*	candidate	442	8.3e-14	R	1	Anaeromyxobacter_dehalogenans_2CP-1_chromosome_	-	-	2		Candidate_44_NC_011035(para),Candidate_89_NC_011035(para)	-	-	-	-
Candidate_15_NC_011035	|	NGK_0694		hypothetical_protein	*	<<<	1	|	570772	571000	>>>	228	|	4	<<<	NGK_0695	putative_serotype-1-specific_antigen	*	candidate	208	0.0036	R	6	Neisseria_gonorrhoeae_FA_1090_chromosome_<>Neisseria_meningitidis_MC58_chromosome_<>Neisseria_meningitidis_Z2491_chromosome_<>Neisseria_meningitidis_FAM18_chromosome_<>Neisseria_meningitidis_053442_chromosome_<>Neisseria_meningitidis_alpha14_chromosome_	RNA	-	49		Candidate_702_NC_011035(para),Candidate_676_NC_011035(para),Candidate_464_NC_011035(para),Candidate_465_NC_011035(para),Candidate_491_NC_011035(para),Candidate_492_NC_011035(para),Candidate_493_NC_011035(para),Candidate_527_NC_011035(para),Candidate_622_NC_011035(para),Candidate_623_NC_011035(para),Candidate_693_NC_011035(para),Candidate_407_NC_011035(para),Candidate_703_NC_011035(para),Candidate…	-	-	-	-
Candidate_16_NC_011035	|	NGK_0714		putative_IS1016_transposase	*	<<<	1	|	586044	586146	>>>	102	|	3	<<<	NGK_0715	hypothetical_protein	*	candidate	88	0.00039	R	6	Neisseria_gonorrhoeae_FA_1090_chromosome_<>Neisseria_meningitidis_MC58_chromosome_<>Neisseria_meningitidis_Z2491_chromosome_<>Neisseria_meningitidis_FAM18_chromosome_<>Neisseria_meningitidis_053442_chromosome_<>Neisseria_meningitidis_alpha14_chromosome_	-	-	4		Candidate_514_NC_011035(para),Candidate_688_NC_011035(para),Candidate_729_NC_011035(para),Candidate_197_NC_011035(para)	-	-	-	-
Candidate_17_NC_011035	|	NGK_0763		Inner_membrane_protein	*	>>>	1	|	623887	623953	>>>	66	|	-8	<<<	NGK_0764	hypothetical_protein	*	candidate	210	0.0018	R	4	Neisseria_gonorrhoeae_FA_1090_chromosome_<>Neisseria_meningitidis_MC58_chromosome_<>Neisseria_meningitidis_FAM18_chromosome_<>Neisseria_meningitidis_053442_chromosome_	-	-	1		Candidate_771_NC_011035(para)	-	-	-	-
Candidate_18_NC_011035	|	NGK_0788		putative_phage_associated_protein	*	>>>	1	|	640758	640902	>>>	144	|	-47	>>>	NGK_0789	putative_phage_associated_protein	*	candidate	486	7.3e-16	R	6	Neisseria_gonorrhoeae_FA_1090_chromosome_<>Neisseria_meningitidis_MC58_chromosome_<>Neisseria_meningitidis_Z2491_chromosome_<>Neisseria_meningitidis_FAM18_chromosome_<>Neisseria_meningitidis_053442_chromosome_<>Neisseria_meningitidis_alpha14_chromosome_	-	-	1		Candidate_771_NC_011035(para)	-	5	-	-
Candidate_19_NC_011035	|	NGK_0790		RNA_polymerase_sigma_factor_RpoD	*	<<<	1	|	643077	643119	>>>	42	|	142	<<<	NGK_0791	DNA_primase	*	candidate	912	5.7e-35	R	5	Neisseria_gonorrhoeae_FA_1090_chromosome_<>Neisseria_meningitidis_MC58_chromosome_<>Neisseria_meningitidis_Z2491_chromosome_<>Neisseria_meningitidis_053442_chromosome_<>Neisseria_meningitidis_alpha14_chromosome_	-	-	0	-	-	-	-	-	-
Candidate_20_NC_011035	|	NGK_0808		Oxidoreductase,_putative	*	<<<	1	|	660712	660811	>>>	99	|	8	<<<	NGK_0809	Serum_response_factor-binding_protein_1	*	candidate	545	3.7e-18	R	6	Neisseria_gonorrhoeae_FA_1090_chromosome_<>Neisseria_meningitidis_MC58_chromosome_<>Neisseria_meningitidis_Z2491_chromosome_<>Neisseria_meningitidis_FAM18_chromosome_<>Neisseria_meningitidis_053442_chromosome_<>Neisseria_meningitidis_alpha14_chromosome_	RNA	-	0	-	-	-	-	-	-
Candidate_21_NC_011035	|	NGK_0817		acetate_kinase	*	<<<	1	|	667202	667256	>>>	54	|	97	>>>	NGK_0818	hypothetical_protein	*	candidate	702	9.2e-26	R	6	Neisseria_gonorrhoeae_FA_1090_chromosome_<>Neisseria_meningitidis_MC58_chromosome_<>Neisseria_meningitidis_Z2491_chromosome_<>Neisseria_meningitidis_FAM18_chromosome_<>Neisseria_meningitidis_053442_chromosome_<>Neisseria_meningitidis_alpha14_chromosome_	-	-	0	-	-	-	-	-	-
Candidate_22_NC_011035	|	NGK_0905		transcription_elongation_factor_GreA	*	>>>	35	|	735715	735984	>>>	269	|	-14	>>>	NGK_0906	porin	*	candidate	210	0.0028	R	7	Neisseria_gonorrhoeae_FA_1090_chromosome_<>Neisseria_meningitidis_MC58_chromosome_<>Neisseria_meningitidis_Z2491_chromosome_<>Neisseria_meningitidis_FAM18_chromosome_<>Caldicellulosiruptor_saccharolyticus_DSM_8903_chromosome_<>Neisseria_meningitidis_053442_chromosome_<>Neisseria_meningitidis_alpha14_chromosome_	RNA	-	1		Candidate_771_NC_011035(para)	-	5	RS	-E.coli_sig70_3(7.23|-119)
Candidate_23_NC_011035	|	NGK_0923		putative_IS150_ORF_B	*	>>>	237	|	750573	750613	>>>	40	|	464	<<<	NGK_0924	hypothetical_protein	*	candidate	498	8.7e-17	R	45	Bordetella_parapertussis_12822_chromosome_<>Bordetella_pertussis_Tohama_I_chromosome_<>Neisseria_gonorrhoeae_FA_1090_chromosome_<>Neisseria_meningitidis_MC58_chromosome_<>Neisseria_meningitidis_Z2491_chromosome_<>Campylobacter_jejuni_RM1221_chromosome_<>Photorhabdus_luminescens_subsp._laumondii_TTO1_chromosome_<>Legionella_pneumophila_str._Paris_chromosome_<>Legionella_pneumophila_str._Lens_chrom…	RNA	NC_003112_tmRNA(-)_-_(hom|rev)	0		Candidate_272_NC_011035(anti),Candidate_273_NC_011035(tandem)	-	-	-	-
Candidate_24_NC_011035	|	NGK_0992		hypothetical_protein	*	>>>	1	|	804691	805111	>>>	420	|	-44	>>>	NGK_0993	hypothetical_protein	*	candidate	1842	1.7e-77	R	1	Neisseria_gonorrhoeae_FA_1090_chromosome_	RNA	-	1		Candidate_771_NC_011035(para)	-	5	RS	-
Candidate_25_NC_011035	|	NGK_1096		hypothetical_protein	*	<<<	24	|	896948	897043	>>>	95	|	-12	>>>	NGK_1097	homoserine_dehydrogenase	*	candidate	398	1e-11	R	5	Neisseria_gonorrhoeae_FA_1090_chromosome_<>Neisseria_meningitidis_MC58_chromosome_<>Neisseria_meningitidis_Z2491_chromosome_<>Neisseria_meningitidis_053442_chromosome_<>Neisseria_meningitidis_alpha14_chromosome_	-	-	1		Candidate_771_NC_011035(para)	-	5	-	-
Candidate_26_NC_011035	|	NGK_1111		recombination_protein_RecR	*	<<<	1	|	909399	909449	>>>	50	|	11	<<<	NGK_1112	putative_peptidyl-prolyl_cis-trans_isomerase	*	candidate	279	6.5e-06	R	6	Neisseria_gonorrhoeae_FA_1090_chromosome_<>Neisseria_meningitidis_MC58_chromosome_<>Neisseria_meningitidis_Z2491_chromosome_<>Neisseria_meningitidis_FAM18_chromosome_<>Neisseria_meningitidis_053442_chromosome_<>Neisseria_meningitidis_alpha14_chromosome_	RNA	-	0	-	-	-	-	-	-
Candidate_27_NC_011035	|	NGK_1142		hypothetical_protein	*	>>>	68	|	939119	939219	>>>	100	|	122	>>>	NGK_1143	putative_oxidoreductase	*	candidate	311	6.6e-08	R	4	Neisseria_gonorrhoeae_FA_1090_chromosome_<>Neisseria_meningitidis_Z2491_chromosome_<>Methanosarcina_acetivorans_C2A_chromosome_<>Trichodesmium_erythraeum_IMS101_chromosome_	RNA	-	0	-	-	-	-	-	-E.coli_sig70_2(7.49|-165)
Candidate_29_NC_011035	|	NGK_1260		hypothetical_protein	*	<<<	118	|	1031780	1031824	>>>	44	|	1	>>>	NGK_1259	hypothetical_protein	*	candidate	235	0.00019	R	6	Neisseria_gonorrhoeae_FA_1090_chromosome_<>Neisseria_meningitidis_MC58_chromosome_<>Neisseria_meningitidis_Z2491_chromosome_<>Neisseria_meningitidis_FAM18_chromosome_<>Neisseria_meningitidis_053442_chromosome_<>Neisseria_meningitidis_alpha14_chromosome_	-	-	0		Candidate_91_NC_011035(anti)	-	5	-	-E.coli_sig70_2(7.57|-74)
Candidate_30_NC_011035	|	NGK_1327		IS1106_transposase	*	>>>	1	|	1094485	1094680	>>>	195	|	1	<<<	NGK_1328	cell_division_protein_FtsK	*	candidate	113	0.00053	R	6	Neisseria_gonorrhoeae_FA_1090_chromosome_<>Neisseria_meningitidis_MC58_chromosome_<>Neisseria_meningitidis_Z2491_chromosome_<>Neisseria_meningitidis_FAM18_chromosome_<>Neisseria_meningitidis_053442_chromosome_<>Neisseria_meningitidis_alpha14_chromosome_	RNA	-	4		Candidate_172_NC_011035(para),Candidate_791_NC_011035(para),Candidate_288_NC_011035(para),Candidate_63_NC_011035(para)	-	-	-	-
Candidate_32_NC_011035	|	NGK_1512		hypothetical_protein	*	<<<	120	|	1253974	1254088	>>>	114	|	71	<<<	NGK_1513	putative_AsnC-family_transcriptional_regulator	*	candidate	227	0.00071	R	8	Neisseria_gonorrhoeae_FA_1090_chromosome_<>Neisseria_meningitidis_MC58_chromosome_<>Neisseria_meningitidis_Z2491_chromosome_<>Chromobacterium_violaceum_ATCC_12472_chromosome_<>Neisseria_meningitidis_FAM18_chromosome_<>Neisseria_meningitidis_053442_chromosome_<>Laribacter_hongkongensis_HLHK9_chromosome_<>Neisseria_meningitidis_alpha14_chromosome_	RNA	-	0	-	-	-	-	-	-E.coli_sig70_2(7.25|-103)
Candidate_33_NC_011035	|	NGK_1527		comE_operon_protein_1-related_protein	*	<<<	2296	|	1265461	1265520	>>>	59	|	1128	<<<	NGK_trnaAla1	tRNA-Ala	*	candidate	595	8e-18	R	14	Thermotoga_maritima_MSB8_chromosome_<>Legionella_pneumophila_subsp._pneumophila_str._Philadelphia_1_chromosome_<>Sulfolobus_tokodaii_str._7_chromosome_<>Staphylococcus_epidermidis_ATCC_12228_chromosome_<>Candidatus_Blochmannia_floridanus_chromosome_<>Burkholderia_mallei_ATCC_23344_chromosome_1<>Fervidobacterium_nodosum_Rt17-B1_chromosome_<>Coxiella_burnetii_Dugway_5J108-111_chromosome_<>Salmonell…	RNA	-	9		Candidate_595_NC_011035(tandem),Candidate_47_NC_011035(para),Candidate_50_NC_011035(para),Candidate_74_NC_011035(para),Candidate_502_NC_011035(para),Candidate_503_NC_011035(para),Candidate_504_NC_011035(para),Candidate_679_NC_011035(para),Candidate_680_NC_011035(para)	-	-	-	-
Candidate_34_NC_011035	|	NGK_trnaIle1		tRNA-Ile	*	<<<	1108	|	1267915	1267961	>>>	46	|	1012	>>>	NGK_1528	putative_flavoprotein	*	candidate	414	5.6e-11	R	3	Haloarcula_marismortui_ATCC_43049_chromosome_I<>Neisseria_meningitidis_053442_chromosome_<>Corynebacterium_aurimucosum_ATCC_700975_chromosome_	-	-	4		Candidate_51_NC_011035(para),Candidate_48_NC_011035(para),Candidate_75_NC_011035(para),Candidate_501_NC_011035(para)	-	-	-	-
Candidate_35_NC_011035	|	NGK_1623		hypothetical_protein	*	<<<	127	|	1355447	1355513	>>>	66	|	336	<<<	NGK_1624	hypothetical_protein	*	candidate	216	0.0027	R	4	Neisseria_gonorrhoeae_FA_1090_chromosome_<>Neisseria_meningitidis_FAM18_chromosome_<>Neisseria_meningitidis_053442_chromosome_<>Neisseria_meningitidis_alpha14_chromosome_	RNA	-	0	-	-	-	-	-	-E.coli_sig70_2(7.12|-208)
Candidate_36_NC_011035	|	NGK_1635		hypothetical_protein	*	<<<	174	|	1362414	1362545	>>>	131	|	-10	<<<	NGK_1636	hypothetical_protein	*	candidate	294	6.5e-07	R	6	Neisseria_gonorrhoeae_FA_1090_chromosome_<>Neisseria_meningitidis_MC58_chromosome_<>Neisseria_meningitidis_Z2491_chromosome_<>Neisseria_meningitidis_FAM18_chromosome_<>Neisseria_meningitidis_053442_chromosome_<>Neisseria_meningitidis_alpha14_chromosome_	-	-	1		Candidate_771_NC_011035(para)	-	-	-	-
Candidate_37_NC_011035	|	NGK_1741		hypothetical_protein	*	>>>	99	|	1446039	1446171	>>>	132	|	-3	<<<	NGK_trnaAsn2	tRNA-Asn	*	candidate	646	3.2e-23	R	6	Neisseria_gonorrhoeae_FA_1090_chromosome_<>Neisseria_meningitidis_MC58_chromosome_<>Neisseria_meningitidis_Z2491_chromosome_<>Neisseria_meningitidis_FAM18_chromosome_<>Neisseria_meningitidis_053442_chromosome_<>Neisseria_meningitidis_alpha14_chromosome_	-	-	1		Candidate_771_NC_011035(para)	-	-	-	-
Candidate_38_NC_011035	|	NGK_1761		aspartyl-tRNA_synthetase	*	<<<	1	|	1461748	1461815	>>>	67	|	-12	<<<	NGK_1762	Integral_membrane_protein	*	candidate	276	9.9e-06	R	6	Neisseria_gonorrhoeae_FA_1090_chromosome_<>Neisseria_meningitidis_MC58_chromosome_<>Neisseria_meningitidis_Z2491_chromosome_<>Neisseria_meningitidis_FAM18_chromosome_<>Neisseria_meningitidis_053442_chromosome_<>Neisseria_meningitidis_alpha14_chromosome_	-	-	1		Candidate_771_NC_011035(para)	-	-	-	-Multi_s54(10.66|-99)
Candidate_39_NC_011035	|	NGK_1764		putative_phospholipase	*	<<<	70	|	1463878	1463956	>>>	78	|	-2	<<<	NGK_1765	30S_ribosomal_protein_S20	*	candidate	390	5.1e-11	R	6	Neisseria_gonorrhoeae_FA_1090_chromosome_<>Neisseria_meningitidis_MC58_chromosome_<>Neisseria_meningitidis_Z2491_chromosome_<>Neisseria_meningitidis_FAM18_chromosome_<>Neisseria_meningitidis_053442_chromosome_<>Neisseria_meningitidis_alpha14_chromosome_	-	-	1		Candidate_771_NC_011035(para)	-	-	-	-
Candidate_40_NC_011035	|	NGK_1764		putative_phospholipase	*	<<<	70	|	1463878	1464018	>>>	140	|	-64	<<<	NGK_1765	30S_ribosomal_protein_S20	*	candidate	390	5.1e-11	R	6	Neisseria_gonorrhoeae_FA_1090_chromosome_<>Neisseria_meningitidis_MC58_chromosome_<>Neisseria_meningitidis_Z2491_chromosome_<>Neisseria_meningitidis_FAM18_chromosome_<>Neisseria_meningitidis_053442_chromosome_<>Neisseria_meningitidis_alpha14_chromosome_	-	-	1		Candidate_771_NC_011035(para)	-	-	-	-
Candidate_41_NC_011035	|	NGK_1844		Sodium/proline_symporter	*	>>>	1	|	1536190	1536290	>>>	100	|	-13	<<<	NGK_1845	Aminotransferase_class-III	*	candidate	418	8.7e-13	R	5	Neisseria_gonorrhoeae_FA_1090_chromosome_<>Neisseria_meningitidis_MC58_chromosome_<>Neisseria_meningitidis_Z2491_chromosome_<>Neisseria_meningitidis_053442_chromosome_<>Neisseria_meningitidis_alpha14_chromosome_	-	-	1		Candidate_771_NC_011035(para)	-	-	-	-
Candidate_43_NC_011035	|	NGK_1901		hypothetical_protein	*	>>>	398	|	1579540	1579673	>>>	133	|	-30	<<<	NGK_1902	UPF0213_protein	*	candidate	507	2e-16	R	6	Neisseria_gonorrhoeae_FA_1090_chromosome_<>Neisseria_meningitidis_MC58_chromosome_<>Neisseria_meningitidis_Z2491_chromosome_<>Neisseria_meningitidis_FAM18_chromosome_<>Neisseria_meningitidis_053442_chromosome_<>Neisseria_meningitidis_alpha14_chromosome_	-	-	1		Candidate_771_NC_011035(para)	-	-	-	-
Candidate_44_NC_011035	|	NGK_1928		hypothetical_protein	*	>>>	29	|	1598638	1598780	>>>	142	|	518	<<<	NGK_1929	putative_phage_associated_protein	*	candidate	442	8.3e-14	R	1	Anaeromyxobacter_dehalogenans_2CP-1_chromosome_	-	-	2		Candidate_14_NC_011035(para),Candidate_89_NC_011035(para)	-	-	-	-
Candidate_45_NC_011035	|	NGK_1962		Modification_methylase	*	<<<	175	|	1618687	1618890	>>>	203	|	-64	<<<	NGK_1964	hypothetical_protein	*	candidate	687	4.9e-25	R	5	Neisseria_gonorrhoeae_FA_1090_chromosome_<>Neisseria_meningitidis_Z2491_chromosome_<>Bacillus_thuringiensis_serovar_konkukian_str._97-27_chromosome_<>Neisseria_meningitidis_FAM18_chromosome_<>Neisseria_meningitidis_alpha14_chromosome_	RNA	-	1		Candidate_771_NC_011035(para)	-	-	-	-
Candidate_46_NC_011035	|	NGK_1963		hypothetical_protein	*	>>>	1	|	1619124	1619190	>>>	66	|	873	>>>	NGK_1965	hypothetical_protein	*	candidate	387	3.5e-11	R	3	Neisseria_gonorrhoeae_FA_1090_chromosome_<>Neisseria_meningitidis_MC58_chromosome_<>Neisseria_meningitidis_Z2491_chromosome_	RNA	-	1		Candidate_427_NC_011035(tandem),Candidate_632_NC_011035(opp)	-	-	-	-
Candidate_47_NC_011035	|	NGK_1966		comE_operon_protein_1-related_protein	*	<<<	2296	|	1622949	1623008	>>>	59	|	1128	<<<	NGK_trnaAla3	tRNA-Ala	*	candidate	595	8e-18	R	14	Thermotoga_maritima_MSB8_chromosome_<>Legionella_pneumophila_subsp._pneumophila_str._Philadelphia_1_chromosome_<>Sulfolobus_tokodaii_str._7_chromosome_<>Staphylococcus_epidermidis_ATCC_12228_chromosome_<>Candidatus_Blochmannia_floridanus_chromosome_<>Burkholderia_mallei_ATCC_23344_chromosome_1<>Fervidobacterium_nodosum_Rt17-B1_chromosome_<>Coxiella_burnetii_Dugway_5J108-111_chromosome_<>Salmonell…	RNA	-	9		Candidate_50_NC_011035(para),Candidate_33_NC_011035(para),Candidate_595_NC_011035(para),Candidate_74_NC_011035(para),Candidate_502_NC_011035(para),Candidate_503_NC_011035(para),Candidate_504_NC_011035(para),Candidate_679_NC_011035(para),Candidate_680_NC_011035(para)	-	-	-	-
Candidate_48_NC_011035	|	NGK_trnaIle2		tRNA-Ile	*	<<<	1108	|	1625403	1625449	>>>	46	|	947	<<<	NGK_1967	Pseudouridine_synthase	*	candidate	3203	5.2e-139	R	3	Haloarcula_marismortui_ATCC_43049_chromosome_I<>Neisseria_meningitidis_053442_chromosome_<>Corynebacterium_aurimucosum_ATCC_700975_chromosome_	-	-	4		Candidate_34_NC_011035(para),Candidate_51_NC_011035(para),Candidate_75_NC_011035(para),Candidate_501_NC_011035(para)	-	-	-	-
Candidate_49_NC_011035	|	NGK_2012		hypothetical_protein	*	<<<	1	|	1667110	1667365	>>>	255	|	10	<<<	NGK_2013	hypothetical_protein	*	candidate	105	0.0047	R	6	Neisseria_gonorrhoeae_FA_1090_chromosome_<>Neisseria_meningitidis_MC58_chromosome_<>Neisseria_meningitidis_Z2491_chromosome_<>Neisseria_meningitidis_FAM18_chromosome_<>Neisseria_meningitidis_053442_chromosome_<>Neisseria_meningitidis_alpha14_chromosome_	RNA	-	12		Candidate_59_NC_011035(para),Candidate_698_NC_011035(para),Candidate_637_NC_011035(para),Candidate_80_NC_011035(para),Candidate_636_NC_011035(para),Candidate_125_NC_011035(para),Candidate_759_NC_011035(para),Candidate_677_NC_011035(para),Candidate_399_NC_011035(para),Candidate_602_NC_011035(para),Candidate_407_NC_011035(para),Candidate_538_NC_011035(para)	-	-	-	-
Candidate_50_NC_011035	|	NGK_2096		comE_operon_protein_1-related_protein	*	<<<	2296	|	1726848	1726907	>>>	59	|	1128	<<<	NGK_trnaAla4	tRNA-Ala	*	candidate	595	8e-18	R	14	Thermotoga_maritima_MSB8_chromosome_<>Legionella_pneumophila_subsp._pneumophila_str._Philadelphia_1_chromosome_<>Sulfolobus_tokodaii_str._7_chromosome_<>Staphylococcus_epidermidis_ATCC_12228_chromosome_<>Candidatus_Blochmannia_floridanus_chromosome_<>Burkholderia_mallei_ATCC_23344_chromosome_1<>Fervidobacterium_nodosum_Rt17-B1_chromosome_<>Coxiella_burnetii_Dugway_5J108-111_chromosome_<>Salmonell…	RNA	-	9		Candidate_47_NC_011035(para),Candidate_33_NC_011035(para),Candidate_595_NC_011035(para),Candidate_74_NC_011035(para),Candidate_502_NC_011035(para),Candidate_503_NC_011035(para),Candidate_504_NC_011035(para),Candidate_679_NC_011035(para),Candidate_680_NC_011035(para)	-	-	-	-
Candidate_51_NC_011035	|	NGK_trnaIle3		tRNA-Ile	*	<<<	1108	|	1729302	1729348	>>>	46	|	942	<<<	NGK_2097	CcsA-related_protein	*	candidate	3203	5.2e-139	R	3	Haloarcula_marismortui_ATCC_43049_chromosome_I<>Neisseria_meningitidis_053442_chromosome_<>Corynebacterium_aurimucosum_ATCC_700975_chromosome_	-	-	4		Candidate_34_NC_011035(para),Candidate_48_NC_011035(para),Candidate_75_NC_011035(para),Candidate_501_NC_011035(para)	-	-	-	-
Candidate_52_NC_011035	|	NGK_2147		NADH_dehydrogenase_subunit_G	*	<<<	32	|	1782072	1782127	>>>	55	|	624	<<<	NGK_2148	NuoF	*	candidate	277	0.0012	R	7	Neisseria_gonorrhoeae_FA_1090_chromosome_<>Neisseria_meningitidis_MC58_chromosome_<>Neisseria_meningitidis_Z2491_chromosome_<>Neisseria_meningitidis_FAM18_chromosome_<>Shewanella_putrefaciens_CN-32_chromosome_<>Neisseria_meningitidis_053442_chromosome_<>Neisseria_meningitidis_alpha14_chromosome_	-	-	7		Candidate_651_NC_011035(tandem),Candidate_210_NC_011035(para),Candidate_125_NC_011035(para),Candidate_759_NC_011035(para),Candidate_523_NC_011035(para),Candidate_691_NC_011035(para),Candidate_677_NC_011035(para)	-	-	-	-
Candidate_53_NC_011035	|	NGK_2204		DNA_recombination_protein_rmuC-like_protein	*	<<<	1	|	1831092	1831366	>>>	274	|	55	<<<	NGK_2205	PetC	*	candidate	1398	3.5e-57	R	6	Neisseria_gonorrhoeae_FA_1090_chromosome_<>Neisseria_meningitidis_MC58_chromosome_<>Neisseria_meningitidis_Z2491_chromosome_<>Neisseria_meningitidis_FAM18_chromosome_<>Neisseria_meningitidis_053442_chromosome_<>Neisseria_meningitidis_alpha14_chromosome_	RNA	-	0	-	-	-	-	-	-E.coli_sig70_2(7.43|-150)
Candidate_54_NC_011035	|	NGK_2298		hypothetical_protein	*	<<<	1	|	1907952	1908045	>>>	93	|	-38	>>>	NGK_2299	hypothetical_protein	*	candidate	285	1.5e-06	R	3	Neisseria_meningitidis_Z2491_chromosome_<>Neisseria_meningitidis_FAM18_chromosome_<>Neisseria_meningitidis_alpha14_chromosome_	RNA	-	1		Candidate_771_NC_011035(para)	-	5	RS	-
Candidate_55_NC_011035	|	NGK_2348		PilT-like_protein	*	<<<	1	|	1950061	1950197	>>>	136	|	25	<<<	NGK_2349	PilT	*	candidate	755	8e-28	R	6	Neisseria_gonorrhoeae_FA_1090_chromosome_<>Neisseria_meningitidis_MC58_chromosome_<>Neisseria_meningitidis_Z2491_chromosome_<>Neisseria_meningitidis_FAM18_chromosome_<>Neisseria_meningitidis_053442_chromosome_<>Neisseria_meningitidis_alpha14_chromosome_	RNA	-	0	-	-	-	-	-	-
Candidate_56_NC_011035	|	NGK_2389		PhnO-related_protein	*	<<<	1	|	1991622	1991845	>>>	223	|	9	>>>	NGK_2390	aspartate_carbamoyltransferase_catalytic_subunit	*	candidate	1068	4e-42	R	6	Neisseria_gonorrhoeae_FA_1090_chromosome_<>Neisseria_meningitidis_MC58_chromosome_<>Neisseria_meningitidis_Z2491_chromosome_<>Neisseria_meningitidis_FAM18_chromosome_<>Neisseria_meningitidis_053442_chromosome_<>Neisseria_meningitidis_alpha14_chromosome_	-	-	0	-	-	-	5	-	-
Candidate_57_NC_011035	|	NGK_2433		hypothetical_protein	*	<<<	1	|	2031826	2031923	>>>	97	|	75	>>>	NGK_2434	hypothetical_protein	*	candidate	870	2.2e-33	R	1	Neisseria_gonorrhoeae_FA_1090_chromosome_	-	-	0	-	-	-	5	-	-
Candidate_58_NC_011035	|	NGK_2460		tRNA_pseudouridine_synthase_A	*	<<<	304	|	2052016	2052113	>>>	97	|	71	<<<	NGK_2461	hypothetical_protein	*	candidate	127	0.0021	R	13	Neisseria_gonorrhoeae_FA_1090_chromosome_<>Coxiella_burnetii_RSA_493_chromosome_<>Neisseria_meningitidis_MC58_chromosome_<>Neisseria_meningitidis_Z2491_chromosome_<>Neisseria_meningitidis_FAM18_chromosome_<>Sphingomonas_wittichii_RW1_chromosome_<>Coxiella_burnetii_Dugway_5J108-111_chromosome_<>Coxiella_burnetii_RSA_331_chromosome_<>Neisseria_meningitidis_053442_chromosome_<>Cupriavidus_taiwanensi…	-	-	5		Candidate_538_NC_011035(para),Candidate_691_NC_011035(para),Candidate_678_NC_011035(para),Candidate_126_NC_011035(para),Candidate_210_NC_011035(para)	-	-	-	-
Candidate_60_NC_011035	|	NGK_2502		hypothetical_protein	*	<<<	2	|	2096608	2096661	>>>	53	|	6	<<<	NGK_2503	SdaA	*	candidate	287	2.6e-06	R	6	Neisseria_gonorrhoeae_FA_1090_chromosome_<>Neisseria_meningitidis_MC58_chromosome_<>Neisseria_meningitidis_Z2491_chromosome_<>Neisseria_meningitidis_FAM18_chromosome_<>Neisseria_meningitidis_053442_chromosome_<>Neisseria_meningitidis_alpha14_chromosome_	RNA	-	11		Candidate_281_NC_011035(para),Candidate_282_NC_011035(para),Candidate_366_NC_011035(para),Candidate_596_NC_011035(para),Candidate_514_NC_011035(para),Candidate_688_NC_011035(para),Candidate_429_NC_011035(para),Candidate_477_NC_011035(para),Candidate_660_NC_011035(para),Candidate_427_NC_011035(para),Candidate_632_NC_011035(para)	-	-	-	-
Candidate_61_NC_011035	|	NGK_2503		SdaA	*	<<<	1	|	2098109	2098195	>>>	86	|	-44	<<<	NGK_2504	DNA_gyrase_subunit_B	*	candidate	202	0.0039	R	4	Neisseria_gonorrhoeae_FA_1090_chromosome_<>Neisseria_meningitidis_Z2491_chromosome_<>Neisseria_meningitidis_FAM18_chromosome_<>Neisseria_meningitidis_alpha14_chromosome_	-	-	1		Candidate_771_NC_011035(para)	-	-	-	-
Candidate_62_NC_011035	|	NGK_2507		CcpR	*	<<<	1	|	2105580	2105624	>>>	44	|	35	<<<	NGK_2508	hypothetical_protein	*	candidate	405	3.8e-12	R	1	Neisseria_gonorrhoeae_FA_1090_chromosome_	-	-	0	-	-	-	-	-	-
Candidate_63_NC_011035	|	NGK_2521		dihydroorotate_dehydrogenase_2	*	>>>	1	|	2115946	2116009	>>>	63	|	131	>>>	NGK_2522	hypothetical_protein	*	candidate	259	9.9e-06	R	4	Neisseria_gonorrhoeae_FA_1090_chromosome_<>Neisseria_meningitidis_MC58_chromosome_<>Neisseria_meningitidis_Z2491_chromosome_<>Neisseria_meningitidis_FAM18_chromosome_	RNA	-	13		Candidate_420_NC_011035(para),Candidate_155_NC_011035(para),Candidate_156_NC_011035(para),Candidate_339_NC_011035(para),Candidate_340_NC_011035(para),Candidate_133_NC_011035(para),Candidate_134_NC_011035(para),Candidate_269_NC_011035(para),Candidate_446_NC_011035(para),Candidate_447_NC_011035(para),Candidate_220_NC_011035(para),Candidate_288_NC_011035(para),Candidate_30_NC_011035(para)	-	-	-	-
Candidate_64_NC_011035	|	NGK_2537		homoserine_kinase	*	>>>	1	|	2132047	2132236	>>>	189	|	-6	<<<	NGK_2538	putative_glucokinase	*	candidate	409	1.6e-12	R	6	Neisseria_gonorrhoeae_FA_1090_chromosome_<>Neisseria_meningitidis_MC58_chromosome_<>Neisseria_meningitidis_Z2491_chromosome_<>Neisseria_meningitidis_FAM18_chromosome_<>Neisseria_meningitidis_053442_chromosome_<>Neisseria_meningitidis_alpha14_chromosome_	RNA	-	1		Candidate_771_NC_011035(para)	-	-	-	-
Candidate_65_NC_011035	|	NGK_2562		putative_sodium-dependent_transporter	*	>>>	1	|	2154110	2154255	>>>	145	|	-23	<<<	NGK_2563	hypothetical_protein	*	candidate	512	8.3e-17	R	6	Neisseria_gonorrhoeae_FA_1090_chromosome_<>Neisseria_meningitidis_MC58_chromosome_<>Neisseria_meningitidis_Z2491_chromosome_<>Neisseria_meningitidis_FAM18_chromosome_<>Neisseria_meningitidis_053442_chromosome_<>Neisseria_meningitidis_alpha14_chromosome_	-	-	1		Candidate_771_NC_011035(para)	-	-	-	-
Candidate_66_NC_011035	|	NGK_2563		hypothetical_protein	*	<<<	1	|	2154675	2154905	>>>	230	|	-39	<<<	NGK_2564	LysA	*	candidate	965	2.2e-37	R	1	Neisseria_gonorrhoeae_FA_1090_chromosome_	RNA	-	1		Candidate_771_NC_011035(para)	-	-	-	-
Candidate_67_NC_011035	|	NGK_2604		regF	*	>>>	6	|	2190315	2190379	<<<	64	|	0	>>>	NGK_2605	ClpXP_protease_specificity-enhancing_factor	*	candidate	323	6e-08	R	5	Neisseria_gonorrhoeae_FA_1090_chromosome_<>Neisseria_meningitidis_MC58_chromosome_<>Neisseria_meningitidis_Z2491_chromosome_<>Neisseria_meningitidis_053442_chromosome_<>Neisseria_meningitidis_alpha14_chromosome_	RNA	-	0		Candidate_554_NC_011035(anti)	-	-	-	-
Candidate_68_NC_011035	|	NGK_2600		50S_ribosomal_protein_L31	*	>>>	8	|	2186791	2186872	<<<	81	|	616	>>>	NGK_2601	CadD	*	candidate	320	1.9e-16	R	19	Neisseria_gonorrhoeae_FA_1090_chromosome_<>Neisseria_meningitidis_MC58_chromosome_<>Neisseria_meningitidis_Z2491_chromosome_<>Streptococcus_pyogenes_MGAS8232_chromosome_<>Streptococcus_pyogenes_MGAS315_chromosome_<>Streptococcus_agalactiae_2603V/R_chromosome_<>Streptococcus_agalactiae_NEM316_chromosome_<>Streptococcus_pyogenes_SSI-1_chromosome_<>Streptococcus_pyogenes_MGAS10394_chromosome_<>Strep…	RNA	-	14		Candidate_553_NC_011035(anti),Candidate_713_NC_011035(anti),Candidate_650_NC_011035(para),Candidate_733_NC_011035(para),Candidate_316_NC_011035(para),Candidate_603_NC_011035(para),Candidate_464_NC_011035(para),Candidate_672_NC_011035(para),Candidate_661_NC_011035(para),Candidate_373_NC_011035(para),Candidate_599_NC_011035(para),Candidate_153_NC_011035(para),Candidate_321_NC_011035(para),Candidate…	-	-	-	-
Candidate_69_NC_011035	|	NGK_trnaAsp2		tRNA-Asp	*	>>>	1	|	2095929	2096041	<<<	112	|	23	>>>	NGK_2501	NlaIII_methyltransferase	*	candidate	537	8e-18	R	4	Neisseria_gonorrhoeae_FA_1090_chromosome_<>Neisseria_meningitidis_MC58_chromosome_<>Neisseria_meningitidis_FAM18_chromosome_<>Neisseria_meningitidis_alpha14_chromosome_	RNA	-	0	-	-	-	-	-	-
Candidate_70_NC_011035	|	NGK_2484		putative_parA_family_protein_-_putative_ATPase	*	>>>	499	|	2076370	2076427	<<<	57	|	188	<<<	NGK_2485	ribonuclease_HII	*	candidate	123	0.0044	R	17	Neisseria_gonorrhoeae_FA_1090_chromosome_<>Coxiella_burnetii_RSA_493_chromosome_<>Neisseria_meningitidis_MC58_chromosome_<>Neisseria_meningitidis_Z2491_chromosome_<>Chlorobium_chlorochromatii_CaD3_chromosome_<>Neisseria_meningitidis_FAM18_chromosome_<>Sphingomonas_wittichii_RW1_chromosome_<>Coxiella_burnetii_Dugway_5J108-111_chromosome_<>Rickettsia_massiliae_MTU5_chromosome_<>Coxiella_burnetii_RS…	RNA	-	5		Candidate_527_NC_011035(opp),Candidate_696_NC_011035(opp),Candidate_733_NC_011035(para),Candidate_678_NC_011035(para),Candidate_399_NC_011035(para),Candidate_636_NC_011035(para)	-	-	-	-
Candidate_71_NC_011035	|	NGK_trnaTrp1		tRNA-Trp	*	>>>	0	|	2011857	2011971	<<<	114	|	916	>>>	NGK_2416	50S_ribosomal_protein_L11	*	candidate	561	6.6e-19	R	6	Neisseria_gonorrhoeae_FA_1090_chromosome_<>Neisseria_meningitidis_MC58_chromosome_<>Neisseria_meningitidis_Z2491_chromosome_<>Neisseria_meningitidis_FAM18_chromosome_<>Neisseria_meningitidis_053442_chromosome_<>Neisseria_meningitidis_alpha14_chromosome_	RNA	-	0	-	-	-	-	-	-E.coli_sig70_1(8.17|-109)E.coli_sig70_2(7.20|-142)
Candidate_72_NC_011035	|	NGK_2381		hypothetical_protein	*	>>>	163	|	1982087	1982479	<<<	392	|	1649	>>>	NGK_2382	putative_secretion_protein	*	candidate	1240	1.7e-50	R	1	Neisseria_meningitidis_FAM18_chromosome_	RNA	-	1		Candidate_511_NC_011035(opp)	-	-	-	-E.coli_sig70_2(9.58|-180)
Candidate_73_NC_011035	|	NGK_2358		hypothetical_protein	*	>>>	2	|	1962472	1962542	<<<	70	|	0	>>>	NGK_2359	Integral_membrane_protein	*	candidate	356	7e-10	R	6	Neisseria_gonorrhoeae_FA_1090_chromosome_<>Neisseria_meningitidis_MC58_chromosome_<>Neisseria_meningitidis_Z2491_chromosome_<>Neisseria_meningitidis_FAM18_chromosome_<>Neisseria_meningitidis_053442_chromosome_<>Neisseria_meningitidis_alpha14_chromosome_	RNA	-	0	-	-	-	-	-	-
Candidate_74_NC_011035	|	NGK_trnaAla5		tRNA-Ala	*	>>>	1128	|	1957267	1957328	<<<	61	|	2493	<<<	NGK_2355	hypothetical_protein	*	candidate	586	2.5e-17	R	14	Thermotoga_maritima_MSB8_chromosome_<>Legionella_pneumophila_subsp._pneumophila_str._Philadelphia_1_chromosome_<>Sulfolobus_tokodaii_str._7_chromosome_<>Staphylococcus_epidermidis_ATCC_12228_chromosome_<>Candidatus_Blochmannia_floridanus_chromosome_<>Burkholderia_mallei_ATCC_23344_chromosome_1<>Fervidobacterium_nodosum_Rt17-B1_chromosome_<>Coxiella_burnetii_Dugway_5J108-111_chromosome_<>Salmonell…	RNA	-	5		Candidate_502_NC_011035(tandem),Candidate_503_NC_011035(tandem),Candidate_504_NC_011035(opp),Candidate_679_NC_011035(tandem),Candidate_680_NC_011035(opp),Candidate_33_NC_011035(para),Candidate_595_NC_011035(para),Candidate_47_NC_011035(para),Candidate_50_NC_011035(para)	-	-	-	-
Candidate_75_NC_011035	|	NGK_2354		hypothetical_protein	*	>>>	594	|	1954826	1954874	<<<	48	|	1106	>>>	NGK_trnaIle4	tRNA-Ile	*	candidate	3038	1.5e-131	R	3	Haloarcula_marismortui_ATCC_43049_chromosome_I<>Neisseria_meningitidis_053442_chromosome_<>Corynebacterium_aurimucosum_ATCC_700975_chromosome_	-	-	4		Candidate_501_NC_011035(tandem),Candidate_34_NC_011035(para),Candidate_48_NC_011035(para),Candidate_51_NC_011035(para)	-	-	-	-
Candidate_76_NC_011035	|	NGK_2332		Cell_division_protein_ftsX-like_protein	*	>>>	1	|	1933453	1933512	<<<	59	|	31	>>>	NGK_2333	BolA/YrbA_family_protein	*	candidate	255	8.3e-05	R	6	Neisseria_gonorrhoeae_FA_1090_chromosome_<>Neisseria_meningitidis_MC58_chromosome_<>Neisseria_meningitidis_Z2491_chromosome_<>Neisseria_meningitidis_FAM18_chromosome_<>Neisseria_meningitidis_053442_chromosome_<>Neisseria_meningitidis_alpha14_chromosome_	RNA	-	2		Candidate_621_NC_011035(para),Candidate_791_NC_011035(para)	-	-	-	-
Candidate_77_NC_011035	|	NGK_2308		hypothetical_protein	*	>>>	-12	|	1914029	1914160	<<<	131	|	168	>>>	NGK_2309	Lipoprotein	*	candidate	550	2e-18	R	6	Neisseria_gonorrhoeae_FA_1090_chromosome_<>Neisseria_meningitidis_MC58_chromosome_<>Neisseria_meningitidis_Z2491_chromosome_<>Neisseria_meningitidis_FAM18_chromosome_<>Neisseria_meningitidis_053442_chromosome_<>Neisseria_meningitidis_alpha14_chromosome_	-	-	1		Candidate_771_NC_011035(para)	-	-	-	-
Candidate_78_NC_011035	|	NGK_2212		50S_ribosomal_protein_L13	*	<<<	284	|	1838263	1838365	<<<	102	|	5	<<<	NGK_2213	hypothetical_protein	*	candidate	274	1.7e-06	R	13	Neisseria_gonorrhoeae_FA_1090_chromosome_<>Neisseria_meningitidis_MC58_chromosome_<>Neisseria_meningitidis_Z2491_chromosome_<>Nitrosomonas_europaea_ATCC_19718_chromosome_<>Chromobacterium_violaceum_ATCC_12472_chromosome_<>Dechloromonas_aromatica_RCB_chromosome_<>Nitrosospira_multiformis_ATCC_25196_chromosome_1<>Methylobacillus_flagellatus_KT_chromosome_<>Nitrosomonas_eutropha_C91_chromosome_<>Nei…	-	-	1		Candidate_666_NC_011035(opp)	-	-	-	-E.coli_sig70_2(8.49|-163)
Candidate_79_NC_011035	|	NGK_2182		putative_integral_membrane_protein	*	<<<	290	|	1808989	1809069	<<<	80	|	133	>>>	NGK_2183	Membrane-bound_lytic_murein_transglycosylase	*	candidate	458	2.3e-14	R	2	Neisseria_gonorrhoeae_FA_1090_chromosome_<>Escherichia_coli_BW2952_chromosome_	-	-	1		Candidate_658_NC_011035(opp)	-	-	-	-E.coli_sig70_1(7.62|-116)E.coli_sig70_3(7.95|-114)
Candidate_80_NC_011035	|	NGK_2160		hypothetical_protein	*	>>>	71	|	1791524	1791716	<<<	192	|	0	>>>	NGK_2161	pilin	*	candidate	104	0.0049	R	6	Neisseria_gonorrhoeae_FA_1090_chromosome_<>Neisseria_meningitidis_MC58_chromosome_<>Neisseria_meningitidis_Z2491_chromosome_<>Neisseria_meningitidis_FAM18_chromosome_<>Neisseria_meningitidis_053442_chromosome_<>Neisseria_meningitidis_alpha14_chromosome_	RNA	-	10		Candidate_538_NC_011035(para),Candidate_615_NC_011035(para),Candidate_523_NC_011035(para),Candidate_691_NC_011035(para),Candidate_126_NC_011035(para),Candidate_696_NC_011035(para),Candidate_534_NC_011035(para),Candidate_49_NC_011035(para),Candidate_807_NC_011035(para),Candidate_59_NC_011035(para)	-	-	-	-
Candidate_81_NC_011035	|	NGK_2098		Signal_recognition_particle_signal_sequence_bindin	*	>>>	2	|	1732692	1732944	<<<	252	|	0	>>>	NGK_2099	hypothetical_protein	*	candidate	1257	1.1e-50	R	1	Neisseria_gonorrhoeae_FA_1090_chromosome_	RNA	-	2		Candidate_455_NC_011035(anti),Candidate_477_NC_011035(para),Candidate_660_NC_011035(para)	-	-	-	-
Candidate_82_NC_011035	|	NGK_2097		CcsA-related_protein	*	<<<	161	|	1731259	1731316	<<<	57	|	2	>>>	NGK_2098	Signal_recognition_particle_signal_sequence_bindin	*	candidate	1057	1.4e-41	R	6	Neisseria_gonorrhoeae_FA_1090_chromosome_<>Neisseria_meningitidis_MC58_chromosome_<>Neisseria_meningitidis_Z2491_chromosome_<>Neisseria_meningitidis_FAM18_chromosome_<>Neisseria_meningitidis_053442_chromosome_<>Neisseria_meningitidis_alpha14_chromosome_	-	-	0	-	-	-	-	-	-
Candidate_83_NC_011035	|	NGK_1974		GloB	*	>>>	3	|	1635540	1635769	<<<	229	|	0	>>>	NGK_1975	MgtE	*	candidate	993	1e-38	R	6	Neisseria_gonorrhoeae_FA_1090_chromosome_<>Neisseria_meningitidis_MC58_chromosome_<>Neisseria_meningitidis_Z2491_chromosome_<>Neisseria_meningitidis_FAM18_chromosome_<>Neisseria_meningitidis_053442_chromosome_<>Neisseria_meningitidis_alpha14_chromosome_	RNA	-	5		Candidate_429_NC_011035(anti),Candidate_514_NC_011035(para),Candidate_688_NC_011035(para),Candidate_131_NC_011035(para),Candidate_373_NC_011035(para),Candidate_599_NC_011035(para)	-	-	-	-
Candidate_84_NC_011035	|	NGK_1936		putative_phage_associated_protein	*	<<<	93	|	1603327	1603405	<<<	78	|	0	>>>	NGK_1937	putative_phage_associated_protein	*	candidate	851	3.5e-32	R	1	Neisseria_gonorrhoeae_FA_1090_chromosome_	-	-	1		Candidate_103_NC_011035(para)	-	-	-	-E.coli_sig70_2(7.42|-76)
Candidate_85_NC_011035	|	NGK_1904		GlnA	*	<<<	-7	|	1582976	1583046	<<<	70	|	0	>>>	NGK_1905	putative_shikimate_dehydrogenase	*	candidate	269	3.8e-06	R	3	Neisseria_gonorrhoeae_FA_1090_chromosome_<>Neisseria_meningitidis_MC58_chromosome_<>Neisseria_meningitidis_Z2491_chromosome_	-	-	1		Candidate_771_NC_011035(para)	-	5	-	-
Candidate_86_NC_011035	|	NGK_1823		FtsW	*	<<<	-58	|	1516190	1516308	<<<	118	|	0	<<<	NGK_1824	UDP-N-acetylmuramoyl-L-alanyl-D-glutamate_syntheta	*	candidate	269	7.7e-06	R	6	Neisseria_gonorrhoeae_FA_1090_chromosome_<>Neisseria_meningitidis_MC58_chromosome_<>Neisseria_meningitidis_Z2491_chromosome_<>Neisseria_meningitidis_FAM18_chromosome_<>Neisseria_meningitidis_053442_chromosome_<>Neisseria_meningitidis_alpha14_chromosome_	RNA	-	1		Candidate_771_NC_011035(para)	-	5	RS	-E.coli_sig70_2(7.41|-64)
Candidate_87_NC_011035	|	NGK_1539		hemoglobin_receptor	*	<<<	-44	|	1279725	1279995	<<<	270	|	0	>>>	NGK_1540	IS1016_transposase	*	candidate	211	0.0047	R	6	Neisseria_gonorrhoeae_FA_1090_chromosome_<>Neisseria_meningitidis_MC58_chromosome_<>Neisseria_meningitidis_Z2491_chromosome_<>Neisseria_meningitidis_FAM18_chromosome_<>Neisseria_meningitidis_053442_chromosome_<>Neisseria_meningitidis_alpha14_chromosome_	RNA	-	1		Candidate_771_NC_011035(para)	-	5	RS	-
Candidate_88_NC_011035	|	NGK_1486		hypothetical_protein	*	<<<	-20	|	1228100	1228254	<<<	154	|	511	>>>	NGK_1487	hypothetical_protein	*	candidate	165	0.00047	R	3	Rickettsia_rickettsii_str._'Sheila_Smith'_chromosome_<>Chlorobaculum_parvum_NCIB_8327_chromosome_<>Rickettsia_peacockii_str._Rustic_chromosome_	-	-	1		Candidate_771_NC_011035(para)	-	5	-	-
Candidate_89_NC_011035	|	NGK_1463		putative_phage_associated_protein	*	>>>	518	|	1213961	1214105	<<<	144	|	27	<<<	NGK_1464	hypothetical_protein	*	candidate	442	8.3e-14	R	1	Anaeromyxobacter_dehalogenans_2CP-1_chromosome_	-	-	2		Candidate_14_NC_011035(para),Candidate_44_NC_011035(para)	-	-	-	-
Candidate_90_NC_011035	|	NGK_1346		tRNA_(guanine-N(7)-)-methyltransferase	*	>>>	109	|	1111050	1111093	<<<	43	|	297	>>>	NGK_1347	hypothetical_protein	*	candidate	512	2.1e-17	R	6	Neisseria_gonorrhoeae_FA_1090_chromosome_<>Neisseria_meningitidis_MC58_chromosome_<>Neisseria_meningitidis_Z2491_chromosome_<>Neisseria_meningitidis_FAM18_chromosome_<>Neisseria_meningitidis_053442_chromosome_<>Neisseria_meningitidis_alpha14_chromosome_	RNA	-	3		Candidate_332_NC_011035(opp),Candidate_446_NC_011035(para),Candidate_447_NC_011035(para)	-	-	-	-
Candidate_91_NC_011035	|	NGK_1260		hypothetical_protein	*	<<<	120	|	1031782	1031825	<<<	43	|	0	>>>	NGK_1259	hypothetical_protein	*	candidate	235	0.00019	R	6	Neisseria_gonorrhoeae_FA_1090_chromosome_<>Neisseria_meningitidis_MC58_chromosome_<>Neisseria_meningitidis_Z2491_chromosome_<>Neisseria_meningitidis_FAM18_chromosome_<>Neisseria_meningitidis_053442_chromosome_<>Neisseria_meningitidis_alpha14_chromosome_	-	-	0		Candidate_29_NC_011035(anti)	-	-	-	-
Candidate_92_NC_011035	|	NGK_1236		hypothetical_protein	*	>>>	10	|	1011808	1011896	<<<	88	|	0	>>>	NGK_1237	putative_methylase_family_protein	*	candidate	459	1.3e-14	R	3	Neisseria_gonorrhoeae_FA_1090_chromosome_<>Neisseria_meningitidis_MC58_chromosome_<>Neisseria_meningitidis_alpha14_chromosome_	-	-	0	-	-	-	-	-	-E.coli_sig70_2(8.37|-54)
Candidate_93_NC_011035	|	NGK_1192		hypothetical_protein	*	<<<	204	|	974022	974127	<<<	105	|	0	>>>	NGK_1194	bifunctional_3,4-dihydroxy-2-butanone_4-phosphate_	*	candidate	1424	7.1e-59	R	5	Neisseria_gonorrhoeae_FA_1090_chromosome_<>Neisseria_meningitidis_MC58_chromosome_<>Neisseria_meningitidis_Z2491_chromosome_<>Neisseria_meningitidis_FAM18_chromosome_<>Neisseria_meningitidis_053442_chromosome_	COD	-	0	-	-	-	-	-	-
Candidate_94_NC_011035	|	NGK_1137		type_I_restriction-modification_system,_M_subunit	*	<<<	306	|	933183	933268	<<<	85	|	0	<<<	NGK_1138	recombinase_A	*	candidate	128	0.0046	R	6	Neisseria_gonorrhoeae_FA_1090_chromosome_<>Neisseria_meningitidis_MC58_chromosome_<>Neisseria_meningitidis_Z2491_chromosome_<>Neisseria_meningitidis_FAM18_chromosome_<>Neisseria_meningitidis_053442_chromosome_<>Neisseria_meningitidis_alpha14_chromosome_	RNA	-	6		Candidate_478_NC_011035(para),Candidate_672_NC_011035(para),Candidate_281_NC_011035(para),Candidate_282_NC_011035(para),Candidate_650_NC_011035(para),Candidate_726_NC_011035(para)	-	-	-	-
Candidate_95_NC_011035	|	NGK_1135		DNA_polymerase_III_subunits_gamma_and_tau	*	>>>	-3	|	932198	932280	<<<	82	|	0	>>>	NGK_1136	UPF0133_protein	*	candidate	373	2.9e-10	R	6	Neisseria_gonorrhoeae_FA_1090_chromosome_<>Neisseria_meningitidis_MC58_chromosome_<>Neisseria_meningitidis_Z2491_chromosome_<>Neisseria_meningitidis_FAM18_chromosome_<>Neisseria_meningitidis_053442_chromosome_<>Neisseria_meningitidis_alpha14_chromosome_	-	-	1		Candidate_771_NC_011035(para)	-	-	-	-
Candidate_96_NC_011035	|	NGK_0960		2-isopropylmalate_synthase	*	>>>	-4	|	782368	782544	<<<	176	|	22	>>>	NGK_0961	hypothetical_protein	*	candidate	207	0.0025	R	7	Neisseria_gonorrhoeae_FA_1090_chromosome_<>Neisseria_meningitidis_MC58_chromosome_<>Neisseria_meningitidis_Z2491_chromosome_<>Ralstonia_metallidurans_CH34_chromosome_2<>Neisseria_meningitidis_FAM18_chromosome_<>Neisseria_meningitidis_053442_chromosome_<>Neisseria_meningitidis_alpha14_chromosome_	RNA	-	1		Candidate_771_NC_011035(para)	-	-	-	-E.coli_sig70_1(8.17|-166)E.coli_sig70_2(7.91|-163)E.coli_sig70_3(7.82|-163)
Candidate_97_NC_011035	|	NGK_0918		putative_acyl-CoA_dehydrogenase	*	>>>	-37	|	748080	748164	<<<	84	|	0	>>>	NGK_0919	rebredoxin	*	candidate	240	0.00018	R	1	Neisseria_gonorrhoeae_FA_1090_chromosome_	-	-	1		Candidate_771_NC_011035(para)	-	-	-	-
Candidate_98_NC_011035	|	NGK_0914		hypothetical_protein	*	>>>	-13	|	743852	743960	<<<	108	|	0	>>>	NGK_0915	D-lactate_dehydrogenase	*	candidate	480	3.6e-15	R	1	Neisseria_gonorrhoeae_FA_1090_chromosome_	RNA	-	1		Candidate_771_NC_011035(para)	-	-	-	-
Candidate_100_NC_011035	|	NGK_0710		MAFB_alternative_C-terminus	*	<<<	350	|	582335	582376	<<<	41	|	135	<<<	NGK_0711	hypothetical_protein	*	candidate	406	2.2e-12	R	6	Neisseria_gonorrhoeae_FA_1090_chromosome_<>Neisseria_meningitidis_MC58_chromosome_<>Neisseria_meningitidis_Z2491_chromosome_<>Neisseria_meningitidis_FAM18_chromosome_<>Neisseria_meningitidis_053442_chromosome_<>Neisseria_meningitidis_alpha14_chromosome_	-	-	3		Candidate_101_NC_011035(para),Candidate_538_NC_011035(para),Candidate_333_NC_011035(para)	-	-	-	-
Candidate_101_NC_011035	|	NGK_0708		MafB5	*	<<<	546	|	580889	580931	<<<	42	|	453	>>>	NGK_0709	hypothetical_protein	*	candidate	514	2.6e-17	R	6	Neisseria_gonorrhoeae_FA_1090_chromosome_<>Neisseria_meningitidis_MC58_chromosome_<>Neisseria_meningitidis_Z2491_chromosome_<>Neisseria_meningitidis_FAM18_chromosome_<>Neisseria_meningitidis_053442_chromosome_<>Neisseria_meningitidis_alpha14_chromosome_	RNA	-	2		Candidate_100_NC_011035(para),Candidate_538_NC_011035(para)	-	-	-	-
Candidate_103_NC_011035	|	NGK_0653		putative_phage_associated_protein	*	<<<	93	|	537212	537290	<<<	78	|	0	>>>	NGK_0654	putative_phage_associated_protein	*	candidate	842	8.9e-32	R	1	Neisseria_gonorrhoeae_FA_1090_chromosome_	RNA	-	1		Candidate_84_NC_011035(para)	-	-	RS	-E.coli_sig70_2(7.42|-76)
Candidate_104_NC_011035	|	NGK_0630		AzlC-related_protein	*	<<<	-26	|	523382	523632	<<<	250	|	0	>>>	NGK_0631	deoxyuridine_5_-triphosphate_nucleotidohydrolase	*	candidate	258	1.8e-05	R	3	Neisseria_gonorrhoeae_FA_1090_chromosome_<>Neisseria_meningitidis_MC58_chromosome_<>Neisseria_meningitidis_alpha14_chromosome_	RNA	-	1		Candidate_771_NC_011035(para)	-	5	RS	-
Candidate_105_NC_011035	|	NGK_trnaGln2		tRNA-Gln	*	>>>	-6	|	507180	507353	<<<	173	|	20	>>>	NGK_0611	ribose-phosphate_pyrophosphokinase	*	candidate	784	3.8e-29	R	6	Neisseria_gonorrhoeae_FA_1090_chromosome_<>Neisseria_meningitidis_MC58_chromosome_<>Neisseria_meningitidis_Z2491_chromosome_<>Neisseria_meningitidis_FAM18_chromosome_<>Neisseria_meningitidis_053442_chromosome_<>Neisseria_meningitidis_alpha14_chromosome_	RNA	-	1		Candidate_771_NC_011035(para)	-	-	-	-
Candidate_106_NC_011035	|	NGK_0446		50S_ribosomal_protein_L20	*	>>>	3	|	371922	371962	<<<	40	|	0	>>>	NGK_0447	hypothetical_protein	*	candidate	220	0.0043	R	6	Neisseria_gonorrhoeae_FA_1090_chromosome_<>Neisseria_meningitidis_MC58_chromosome_<>Neisseria_meningitidis_Z2491_chromosome_<>Neisseria_meningitidis_FAM18_chromosome_<>Neisseria_meningitidis_053442_chromosome_<>Neisseria_meningitidis_alpha14_chromosome_	RNA	-	0	-	-	-	-	-	-E.coli_sig70_3(8.61|-49)
Candidate_107_NC_011035	|	NGK_0446		50S_ribosomal_protein_L20	*	>>>	-37	|	371882	371962	<<<	80	|	0	>>>	NGK_0447	hypothetical_protein	*	candidate	220	0.0043	R	6	Neisseria_gonorrhoeae_FA_1090_chromosome_<>Neisseria_meningitidis_MC58_chromosome_<>Neisseria_meningitidis_Z2491_chromosome_<>Neisseria_meningitidis_FAM18_chromosome_<>Neisseria_meningitidis_053442_chromosome_<>Neisseria_meningitidis_alpha14_chromosome_	-	-	1		Candidate_771_NC_011035(para)	-	-	-	-E.coli_sig70_3(8.61|-89)
Candidate_108_NC_011035	|	NGK_trnaSer1		tRNA-Ser	*	>>>	1	|	317738	317967	<<<	229	|	0	>>>	NGK_0383	tryptophan_synthase_subunit_alpha	*	candidate	494	1.9e-16	R	6	Neisseria_gonorrhoeae_FA_1090_chromosome_<>Neisseria_meningitidis_MC58_chromosome_<>Neisseria_meningitidis_Z2491_chromosome_<>Neisseria_meningitidis_FAM18_chromosome_<>Neisseria_meningitidis_053442_chromosome_<>Neisseria_meningitidis_alpha14_chromosome_	RNA	-	2		Candidate_193_NC_011035(para),Candidate_356_NC_011035(para)	-	-	-	-
Candidate_109_NC_011035	|	NGK_0364		Ribonuclease,_putative	*	<<<	7	|	303356	303427	<<<	71	|	67	<<<	NGK_0365	outer_membrane_protein	*	candidate	381	1.2e-18	R	6	Neisseria_gonorrhoeae_FA_1090_chromosome_<>Neisseria_meningitidis_MC58_chromosome_<>Neisseria_meningitidis_Z2491_chromosome_<>Neisseria_meningitidis_FAM18_chromosome_<>Neisseria_meningitidis_053442_chromosome_<>Neisseria_meningitidis_alpha14_chromosome_	-	-	0	-	-	-	5	-	-
Candidate_110_NC_011035	|	NGK_0256		MtrA	*	<<<	67	|	205802	205862	<<<	60	|	0	>>>	NGK_0257	hypothetical_protein	*	candidate	271	1.7e-05	R	6	Neisseria_gonorrhoeae_FA_1090_chromosome_<>Neisseria_meningitidis_MC58_chromosome_<>Neisseria_meningitidis_Z2491_chromosome_<>Neisseria_meningitidis_FAM18_chromosome_<>Neisseria_meningitidis_053442_chromosome_<>Neisseria_meningitidis_alpha14_chromosome_	-	-	0	-	-	-	-	-	-
Candidate_111_NC_011035	|	NGK_0242		hypothetical_protein	*	>>>	72	|	189288	189346	<<<	58	|	214	>>>	NGK_0243	Irg1	*	candidate	281	1.2e-06	R	11	Haemophilus_influenzae_Rd_KW20_chromosome_<>Neisseria_gonorrhoeae_FA_1090_chromosome_<>Haemophilus_influenzae_86-028NP_chromosome_<>Francisella_novicida_U112_chromosome_<>Neisseria_meningitidis_FAM18_chromosome_<>Haemophilus_influenzae_PittEE_chromosome_<>Neisseria_meningitidis_053442_chromosome_<>Francisella_philomiragia_subsp._philomiragia_ATCC_25017_chromosome_<>Haemophilus_parasuis_SH0165_chr…	-	-	1		Candidate_161_NC_011035(anti),Candidate_804_NC_011035(para)	-	-	-	-
Candidate_112_NC_011035	|	NGK_0168		putative_secretion_protein	*	>>>	10	|	135351	135402	<<<	51	|	266	>>>	NGK_0169	hypothetical_protein	*	candidate	216	1.6e-15	R	6	Neisseria_gonorrhoeae_FA_1090_chromosome_<>Neisseria_meningitidis_MC58_chromosome_<>Neisseria_meningitidis_Z2491_chromosome_<>Neisseria_meningitidis_FAM18_chromosome_<>Neisseria_meningitidis_053442_chromosome_<>Neisseria_meningitidis_alpha14_chromosome_	RNA	-	0	-	-	-	-	-	-
Candidate_113_NC_011035	|	NGK_0019		hypothetical_protein	*	<<<	32	|	13124	13222	<<<	98	|	117	>>>	NGK_0020	hypothetical_protein	*	candidate	508	1.4e-16	R	6	Neisseria_gonorrhoeae_FA_1090_chromosome_<>Neisseria_meningitidis_MC58_chromosome_<>Neisseria_meningitidis_Z2491_chromosome_<>Neisseria_meningitidis_FAM18_chromosome_<>Neisseria_meningitidis_053442_chromosome_<>Neisseria_meningitidis_alpha14_chromosome_	-	-	0	-	-	-	-	-	-
Candidate_114_NC_011035	|	NGK_0003		DNA_polymerase_III_subunit_beta	*	>>>	1	|	2898	2992	>>>	94	|	52	<<<	NGK_0004	polyphosphate_kinase	*	candidate	282	4.6e-23	T	6	Neisseria_gonorrhoeae_FA_1090_chromosome_<>Neisseria_meningitidis_MC58_chromosome_<>Neisseria_meningitidis_Z2491_chromosome_<>Neisseria_meningitidis_FAM18_chromosome_<>Neisseria_meningitidis_053442_chromosome_<>Neisseria_meningitidis_alpha14_chromosome_	-	-	0	-	-	-	-	-	-
Candidate_115_NC_011035	|	NGK_0009		leucyl-tRNA_synthetase	*	>>>	1	|	9136	9244	>>>	108	|	118	>>>	NGK_0010	dam-replacing_protein	*	candidate	103	0.0045	T	6	Neisseria_gonorrhoeae_FA_1090_chromosome_<>Neisseria_meningitidis_MC58_chromosome_<>Neisseria_meningitidis_Z2491_chromosome_<>Neisseria_meningitidis_FAM18_chromosome_<>Neisseria_meningitidis_053442_chromosome_<>Neisseria_meningitidis_alpha14_chromosome_	RNA	-	15		Candidate_316_NC_011035(para),Candidate_317_NC_011035(para),Candidate_601_NC_011035(para),Candidate_726_NC_011035(para),Candidate_741_NC_011035(para),Candidate_544_NC_011035(para),Candidate_707_NC_011035(para),Candidate_160_NC_011035(para),Candidate_133_NC_011035(para),Candidate_134_NC_011035(para),Candidate_258_NC_011035(para),Candidate_155_NC_011035(para),Candidate_156_NC_011035(para),Candidate…	-	-	-	-
Candidate_116_NC_011035	|	NGK_0015		hypothetical_protein	*	>>>	101	|	11646	11733	>>>	87	|	360	<<<	NGK_0016	hypothetical_protein	*	candidate	646	8.3e-23	T	3	Neisseria_gonorrhoeae_FA_1090_chromosome_<>Neisseria_meningitidis_FAM18_chromosome_<>Neisseria_meningitidis_alpha14_chromosome_	RNA	-	4		Candidate_117_NC_011035(opp),Candidate_2_NC_011035(para),Candidate_120_NC_011035(para),Candidate_121_NC_011035(para)	-	-	-	-
Candidate_117_NC_011035	|	NGK_0015		hypothetical_protein	*	>>>	221	|	11766	12093	<<<	327	|	0	<<<	NGK_0016	hypothetical_protein	*	candidate	400	7.9e-116	T	2	Neisseria_gonorrhoeae_FA_1090_chromosome_<>Neisseria_meningitidis_alpha14_chromosome_	-	-	1		Candidate_116_NC_011035(opp)	-	-	-	-
Candidate_118_NC_011035	|	NGK_0015		hypothetical_protein	*	>>>	490	|	12035	12141	>>>	106	|	-48	<<<	NGK_0016	hypothetical_protein	*	candidate	282	7.9e-07	T	4	Neisseria_meningitidis_MC58_chromosome_<>Neisseria_meningitidis_Z2491_chromosome_<>Neisseria_meningitidis_FAM18_chromosome_<>Neisseria_meningitidis_053442_chromosome_	RNA	-	1		Candidate_771_NC_011035(para)	-	-	-	-
Candidate_119_NC_011035	|	NGK_0021		hypothetical_protein	*	>>>	1	|	13908	13993	>>>	85	|	-13	<<<	NGK_trnaLeu1	tRNA-Leu	*	candidate	199	0.0042	T	5	Neisseria_gonorrhoeae_FA_1090_chromosome_<>Neisseria_meningitidis_Z2491_chromosome_<>Neisseria_meningitidis_FAM18_chromosome_<>Neisseria_meningitidis_053442_chromosome_<>Neisseria_meningitidis_alpha14_chromosome_	-	-	1		Candidate_771_NC_011035(para)	-	-	-	-
Candidate_120_NC_011035	|	NGK_0033		putative_AraC-family_transcriptional_regulator	*	>>>	40	|	22312	22383	<<<	71	|	0	<<<	NGK_0034	putative_prolyl_endopeptidase	*	candidate	501	3.4e-16	B	6	Neisseria_gonorrhoeae_FA_1090_chromosome_<>Neisseria_meningitidis_MC58_chromosome_<>Neisseria_meningitidis_Z2491_chromosome_<>Neisseria_meningitidis_FAM18_chromosome_<>Neisseria_meningitidis_053442_chromosome_<>Neisseria_meningitidis_alpha14_chromosome_	RNA	-	3		Candidate_2_NC_011035(anti),Candidate_121_NC_011035(anti),Candidate_116_NC_011035(para),Candidate_557_NC_011035(para),Candidate_716_NC_011035(para)	-	3	-	-
Candidate_122_NC_011035	|	NGK_0064		hypothetical_protein	*	<<<	23	|	48862	48986	<<<	124	|	729	<<<	NGK_0065	hypothetical_protein	*	candidate	149	0.0032	T	1	Herpetosiphon_aurantiacus_ATCC_23779_chromosome_	RNA	-	4		Candidate_123_NC_011035(tandem),Candidate_124_NC_011035(tandem),Candidate_128_NC_011035(para),Candidate_129_NC_011035(para),Candidate_387_NC_011035(para)	-	5	RS	-
Candidate_123_NC_011035	|	NGK_0064		hypothetical_protein	*	<<<	304	|	49143	49193	<<<	50	|	522	<<<	NGK_0065	hypothetical_protein	*	candidate	160	0.0032	T	2	Enterobacter_sp._638_chromosome_<>Herpetosiphon_aurantiacus_ATCC_23779_chromosome_	RNA	-	4		Candidate_122_NC_011035(tandem),Candidate_124_NC_011035(tandem),Candidate_128_NC_011035(para),Candidate_129_NC_011035(para),Candidate_126_NC_011035(para)	-	-	-	-
Candidate_124_NC_011035	|	NGK_0064		hypothetical_protein	*	<<<	585	|	49424	49474	<<<	50	|	241	<<<	NGK_0065	hypothetical_protein	*	candidate	138	0.0032	T	8	Neisseria_gonorrhoeae_FA_1090_chromosome_<>Neisseria_meningitidis_MC58_chromosome_<>Neisseria_meningitidis_Z2491_chromosome_<>Neisseria_meningitidis_FAM18_chromosome_<>Enterobacter_sp._638_chromosome_<>Herpetosiphon_aurantiacus_ATCC_23779_chromosome_<>Neisseria_meningitidis_053442_chromosome_<>Neisseria_meningitidis_alpha14_chromosome_	RNA	-	4		Candidate_122_NC_011035(tandem),Candidate_123_NC_011035(tandem),Candidate_128_NC_011035(para),Candidate_129_NC_011035(para),Candidate_616_NC_011035(para)	-	-	-	-
Candidate_125_NC_011035	|	NGK_0072		hypothetical_protein	*	>>>	105	|	53507	53546	>>>	39	|	50	>>>	NGK_0073	hypothetical_protein	*	candidate	96	0.003	T	28	Neisseria_gonorrhoeae_FA_1090_chromosome_<>Coxiella_burnetii_RSA_493_chromosome_<>Rickettsia_conorii_str._Malish_7_chromosome_<>Neisseria_meningitidis_MC58_chromosome_<>Neisseria_meningitidis_Z2491_chromosome_<>Rickettsia_felis_URRWXCal2_chromosome_<>Chlorobium_chlorochromatii_CaD3_chromosome_<>Rickettsia_bellii_RML369-C_chromosome_<>Shewanella_sp._W3-18-1_chromosome_<>Neisseria_meningitidis_FAM1…	RNA	-	27		Candidate_759_NC_011035(tandem),Candidate_677_NC_011035(para),Candidate_733_NC_011035(para),Candidate_527_NC_011035(para),Candidate_696_NC_011035(para),Candidate_766_NC_011035(para),Candidate_636_NC_011035(para),Candidate_602_NC_011035(para),Candidate_399_NC_011035(para),Candidate_691_NC_011035(para),Candidate_407_NC_011035(para),Candidate_28_NC_011035(para),Candidate_309_NC_011035(para),Candidat…	-	5	RS	-
Candidate_126_NC_011035	|	NGK_0075		hypothetical_protein	*	>>>	6	|	57122	57381	>>>	259	|	72	<<<	NGK_0076	hypothetical_protein	*	candidate	204	0.0037	T	6	Neisseria_gonorrhoeae_FA_1090_chromosome_<>Neisseria_meningitidis_MC58_chromosome_<>Neisseria_meningitidis_Z2491_chromosome_<>Neisseria_meningitidis_FAM18_chromosome_<>Neisseria_meningitidis_053442_chromosome_<>Neisseria_meningitidis_alpha14_chromosome_	RNA	-	16		Candidate_129_NC_011035(para),Candidate_616_NC_011035(para),Candidate_124_NC_011035(para),Candidate_58_NC_011035(para),Candidate_538_NC_011035(para),Candidate_534_NC_011035(para),Candidate_701_NC_011035(para),Candidate_527_NC_011035(para),Candidate_696_NC_011035(para),Candidate_80_NC_011035(para),Candidate_59_NC_011035(para),Candidate_698_NC_011035(para),Candidate_636_NC_011035(para),Candidate_40…	-	-	-	-
Candidate_127_NC_011035	|	NGK_0075		hypothetical_protein	*	>>>	6	|	57122	57362	>>>	240	|	91	<<<	NGK_0076	hypothetical_protein	*	candidate	204	0.0037	T	6	Neisseria_gonorrhoeae_FA_1090_chromosome_<>Neisseria_meningitidis_MC58_chromosome_<>Neisseria_meningitidis_Z2491_chromosome_<>Neisseria_meningitidis_FAM18_chromosome_<>Neisseria_meningitidis_053442_chromosome_<>Neisseria_meningitidis_alpha14_chromosome_	RNA	-	16		Candidate_129_NC_011035(para),Candidate_616_NC_011035(para),Candidate_124_NC_011035(para),Candidate_58_NC_011035(para),Candidate_538_NC_011035(para),Candidate_534_NC_011035(para),Candidate_701_NC_011035(para),Candidate_527_NC_011035(para),Candidate_696_NC_011035(para),Candidate_80_NC_011035(para),Candidate_59_NC_011035(para),Candidate_698_NC_011035(para),Candidate_636_NC_011035(para),Candidate_40…	-	-	-	-
Candidate_128_NC_011035	|	NGK_0078		hypothetical_protein	*	>>>	189	|	58677	58722	<<<	45	|	448	<<<	NGK_0079	putative_atpase	*	candidate	126	1.1e-06	T	10	Neisseria_gonorrhoeae_FA_1090_chromosome_<>Neisseria_meningitidis_MC58_chromosome_<>Neisseria_meningitidis_Z2491_chromosome_<>Pseudomonas_fluorescens_Pf0-1_chromosome_<>Neisseria_meningitidis_FAM18_chromosome_<>Enterobacter_sp._638_chromosome_<>Azorhizobium_caulinodans_ORS_571_chromosome_<>Neisseria_meningitidis_053442_chromosome_<>Azotobacter_vinelandii_DJ_chromosome_<>Neisseria_meningitidis_alp…	RNA	-	5		Candidate_129_NC_011035(tandem),Candidate_122_NC_011035(para),Candidate_123_NC_011035(para),Candidate_124_NC_011035(para),Candidate_616_NC_011035(para)	-	-	-	-
Candidate_129_NC_011035	|	NGK_0078		hypothetical_protein	*	>>>	471	|	58959	59004	<<<	45	|	166	<<<	NGK_0079	putative_atpase	*	candidate	122	1.1e-06	T	9	Neisseria_gonorrhoeae_FA_1090_chromosome_<>Neisseria_meningitidis_MC58_chromosome_<>Neisseria_meningitidis_Z2491_chromosome_<>Neisseria_meningitidis_FAM18_chromosome_<>Enterobacter_sp._638_chromosome_<>Neisseria_meningitidis_053442_chromosome_<>Azotobacter_vinelandii_DJ_chromosome_<>Variovorax_paradoxus_S110_chromosome_1<>Neisseria_meningitidis_alpha14_chromosome_	COD	-	5		Candidate_128_NC_011035(tandem),Candidate_122_NC_011035(para),Candidate_123_NC_011035(para),Candidate_124_NC_011035(para),Candidate_126_NC_011035(para)	-	-	-	-
Candidate_130_NC_011035	|	NGK_0082		putative_marR-family_transcriptional_regulator	*	>>>	1	|	61916	62033	>>>	117	|	-5	>>>	NGK_0083	putative_flavoprotein_oxidoreductase	*	candidate	534	1.1e-17	T	6	Neisseria_gonorrhoeae_FA_1090_chromosome_<>Neisseria_meningitidis_MC58_chromosome_<>Neisseria_meningitidis_Z2491_chromosome_<>Neisseria_meningitidis_FAM18_chromosome_<>Neisseria_meningitidis_053442_chromosome_<>Neisseria_meningitidis_alpha14_chromosome_	RNA	-	1		Candidate_771_NC_011035(para)	-	5	RS	-
Candidate_131_NC_011035	|	NGK_0086		formate--tetrahydrofolate_ligase	*	>>>	1	|	65557	65632	>>>	75	|	36	>>>	NGK_0087	GTP-dependent_nucleic_acid-binding_protein_EngD	*	candidate	547	2.9e-18	T	6	Neisseria_gonorrhoeae_FA_1090_chromosome_<>Neisseria_meningitidis_MC58_chromosome_<>Neisseria_meningitidis_Z2491_chromosome_<>Neisseria_meningitidis_FAM18_chromosome_<>Neisseria_meningitidis_053442_chromosome_<>Neisseria_meningitidis_alpha14_chromosome_	RNA	-	11		Candidate_532_NC_011035(para),Candidate_791_NC_011035(para),Candidate_197_NC_011035(para),Candidate_281_NC_011035(para),Candidate_282_NC_011035(para),Candidate_83_NC_011035(para),Candidate_429_NC_011035(para),Candidate_202_NC_011035(para),Candidate_481_NC_011035(para),Candidate_148_NC_011035(para),Candidate_412_NC_011035(para)	-	5	RS	-
Candidate_132_NC_011035	|	NGK_0090		putative_lipo-oligosaccharide_acyltransferase	*	>>>	1	|	68911	68971	>>>	60	|	-1	>>>	NGK_0091	putative_tyrosyl-tRNA_synthase	*	candidate	296	1.2e-06	T	5	Neisseria_gonorrhoeae_FA_1090_chromosome_<>Neisseria_meningitidis_MC58_chromosome_<>Neisseria_meningitidis_Z2491_chromosome_<>Neisseria_meningitidis_FAM18_chromosome_<>Neisseria_meningitidis_053442_chromosome_	-	-	1		Candidate_771_NC_011035(para)	-	5	-	-
Candidate_133_NC_011035	|	NGK_0100		isoleucyl-tRNA_synthetase	*	>>>	1	|	75976	76068	>>>	92	|	121	<<<	NGK_0101	hypothetical_protein	*	candidate	99	0.0047	T	6	Neisseria_gonorrhoeae_FA_1090_chromosome_<>Neisseria_meningitidis_MC58_chromosome_<>Neisseria_meningitidis_Z2491_chromosome_<>Neisseria_meningitidis_FAM18_chromosome_<>Neisseria_meningitidis_053442_chromosome_<>Neisseria_meningitidis_alpha14_chromosome_	RNA	-	15		Candidate_134_NC_011035(anti),Candidate_446_NC_011035(para),Candidate_447_NC_011035(para),Candidate_537_NC_011035(para),Candidate_115_NC_011035(para),Candidate_339_NC_011035(para),Candidate_340_NC_011035(para),Candidate_63_NC_011035(para),Candidate_526_NC_011035(para),Candidate_155_NC_011035(para),Candidate_156_NC_011035(para),Candidate_332_NC_011035(para),Candidate_420_NC_011035(para),Candidate_…	-	-	-	-
Candidate_134_NC_011035	|	NGK_0100		isoleucyl-tRNA_synthetase	*	>>>	9	|	75984	76189	<<<	205	|	0	<<<	NGK_0101	hypothetical_protein	*	candidate	99	0.0047	T	6	Neisseria_gonorrhoeae_FA_1090_chromosome_<>Neisseria_meningitidis_MC58_chromosome_<>Neisseria_meningitidis_Z2491_chromosome_<>Neisseria_meningitidis_FAM18_chromosome_<>Neisseria_meningitidis_053442_chromosome_<>Neisseria_meningitidis_alpha14_chromosome_	RNA	-	15		Candidate_133_NC_011035(anti),Candidate_446_NC_011035(para),Candidate_447_NC_011035(para),Candidate_537_NC_011035(para),Candidate_115_NC_011035(para),Candidate_339_NC_011035(para),Candidate_340_NC_011035(para),Candidate_63_NC_011035(para),Candidate_526_NC_011035(para),Candidate_155_NC_011035(para),Candidate_156_NC_011035(para),Candidate_332_NC_011035(para),Candidate_420_NC_011035(para),Candidate_…	-	-	-	-E.coli_sig70_3(9.65|-325)
Candidate_135_NC_011035	|	NGK_0106		4-hydroxy-3-methylbut-2-enyl_diphosphate_reductase	*	>>>	47	|	79828	79911	>>>	83	|	-31	>>>	NGK_0107	IS1106_transposase	*	candidate	237	8.2e-05	T	6	Neisseria_gonorrhoeae_FA_1090_chromosome_<>Neisseria_meningitidis_MC58_chromosome_<>Neisseria_meningitidis_Z2491_chromosome_<>Neisseria_meningitidis_FAM18_chromosome_<>Neisseria_meningitidis_053442_chromosome_<>Neisseria_meningitidis_alpha14_chromosome_	-	-	1		Candidate_771_NC_011035(para)	-	5	-	-
Candidate_136_NC_011035	|	NGK_0107		IS1106_transposase	*	>>>	1	|	80332	80538	>>>	206	|	-2	<<<	NGK_0108	putative_phosphatase	*	candidate	99	0.00063	T	6	Neisseria_gonorrhoeae_FA_1090_chromosome_<>Neisseria_meningitidis_MC58_chromosome_<>Neisseria_meningitidis_Z2491_chromosome_<>Neisseria_meningitidis_FAM18_chromosome_<>Neisseria_meningitidis_053442_chromosome_<>Neisseria_meningitidis_alpha14_chromosome_	RNA	-	1		Candidate_771_NC_011035(para)	-	-	-	-
Candidate_138_NC_011035	|	NGK_0112		Putative_esterase	*	>>>	352	|	83372	83416	<<<	44	|	295	<<<	NGK_0113	putative_DNA_polymerase_III,_alpha_subunit	*	candidate	146	0.0048	B	6	Neisseria_gonorrhoeae_FA_1090_chromosome_<>Neisseria_meningitidis_MC58_chromosome_<>Neisseria_meningitidis_Z2491_chromosome_<>Neisseria_meningitidis_FAM18_chromosome_<>Neisseria_meningitidis_053442_chromosome_<>Neisseria_meningitidis_alpha14_chromosome_	RNA	-	0		Candidate_3_NC_011035(anti),Candidate_139_NC_011035(opp)	-	-	-	-
Candidate_139_NC_011035	|	NGK_0112		Putative_esterase	*	>>>	519	|	83539	83611	>>>	72	|	100	<<<	NGK_0113	putative_DNA_polymerase_III,_alpha_subunit	*	candidate	128	1.1e-21	T	2	Neisseria_meningitidis_Z2491_chromosome_<>Neisseria_meningitidis_053442_chromosome_	-	-	1		Candidate_3_NC_011035(tandem),Candidate_138_NC_011035(opp)	-	-	-	-
Candidate_140_NC_011035	|	NGK_0117		hypothetical_protein	*	>>>	16	|	88110	88180	>>>	70	|	-20	<<<	NGK_0118	hypothetical_protein	*	candidate	242	4.3e-05	T	5	Neisseria_gonorrhoeae_FA_1090_chromosome_<>Neisseria_meningitidis_MC58_chromosome_<>Neisseria_meningitidis_Z2491_chromosome_<>Neisseria_meningitidis_053442_chromosome_<>Neisseria_meningitidis_alpha14_chromosome_	-	-	1		Candidate_771_NC_011035(para)	-	-	-	-
Candidate_141_NC_011035	|	NGK_0119		hypothetical_protein	*	>>>	1	|	89226	89296	>>>	70	|	-21	<<<	NGK_0120	valine--pyruvate_transaminase	*	candidate	228	0.0016	T	2	Neisseria_gonorrhoeae_FA_1090_chromosome_<>Neisseria_meningitidis_053442_chromosome_	-	-	1		Candidate_771_NC_011035(para)	-	-	-	-
Candidate_143_NC_011035	|	NGK_0144		putative_cytochrome_precursor	*	>>>	6	|	112345	112442	>>>	97	|	173	>>>	NGK_0145	putative_cytochrome_biogenesis_protein	*	candidate	940	2.7e-36	T	6	Neisseria_gonorrhoeae_FA_1090_chromosome_<>Neisseria_meningitidis_MC58_chromosome_<>Neisseria_meningitidis_Z2491_chromosome_<>Neisseria_meningitidis_FAM18_chromosome_<>Neisseria_meningitidis_053442_chromosome_<>Neisseria_meningitidis_alpha14_chromosome_	RNA	-	1		Candidate_185_NC_011035(para)	-	-	-	-
Candidate_144_NC_011035	|	NGK_0146		putative_cytochrome_synthesis_protein	*	>>>	1	|	115750	115840	>>>	90	|	23	>>>	NGK_0147	putative_DNA-binding/iron_metalloprotein/AP_endonu	*	candidate	529	1.8e-17	T	6	Neisseria_gonorrhoeae_FA_1090_chromosome_<>Neisseria_meningitidis_MC58_chromosome_<>Neisseria_meningitidis_Z2491_chromosome_<>Neisseria_meningitidis_FAM18_chromosome_<>Neisseria_meningitidis_053442_chromosome_<>Neisseria_meningitidis_alpha14_chromosome_	RNA	-	3		Candidate_413_NC_011035(para),Candidate_352_NC_011035(para),Candidate_353_NC_011035(para)	-	5	RS	-
Candidate_145_NC_011035	|	NGK_0146		putative_cytochrome_synthesis_protein	*	>>>	1	|	115750	115818	>>>	68	|	45	>>>	NGK_0147	putative_DNA-binding/iron_metalloprotein/AP_endonu	*	candidate	529	1.8e-17	T	6	Neisseria_gonorrhoeae_FA_1090_chromosome_<>Neisseria_meningitidis_MC58_chromosome_<>Neisseria_meningitidis_Z2491_chromosome_<>Neisseria_meningitidis_FAM18_chromosome_<>Neisseria_meningitidis_053442_chromosome_<>Neisseria_meningitidis_alpha14_chromosome_	RNA	-	3		Candidate_413_NC_011035(para),Candidate_352_NC_011035(para),Candidate_353_NC_011035(para)	-	5	RS	-
Candidate_146_NC_011035	|	NGK_0150		S-adenosylmethionine_synthetase	*	>>>	1	|	119383	119457	>>>	74	|	-12	<<<	NGK_0151	Penicillin-binding_protein_3	*	candidate	266	1.3e-05	T	6	Neisseria_gonorrhoeae_FA_1090_chromosome_<>Neisseria_meningitidis_MC58_chromosome_<>Neisseria_meningitidis_Z2491_chromosome_<>Neisseria_meningitidis_FAM18_chromosome_<>Neisseria_meningitidis_053442_chromosome_<>Neisseria_meningitidis_alpha14_chromosome_	-	-	1		Candidate_771_NC_011035(para)	-	-	-	-
Candidate_147_NC_011035	|	NGK_0155		putative_magnesium_citrate_secondary_transporter	*	>>>	1	|	123279	123435	>>>	156	|	109	>>>	NGK_0156	BasR	*	candidate	1056	1.5e-41	T	6	Neisseria_gonorrhoeae_FA_1090_chromosome_<>Neisseria_meningitidis_MC58_chromosome_<>Neisseria_meningitidis_Z2491_chromosome_<>Neisseria_meningitidis_FAM18_chromosome_<>Neisseria_meningitidis_053442_chromosome_<>Neisseria_meningitidis_alpha14_chromosome_	RNA	-	0	-	-	-	-	-	-
Candidate_148_NC_011035	|	NGK_0161		preprotein_translocase_subunit_SecB	*	>>>	1	|	127976	128047	>>>	71	|	12	>>>	NGK_0162	ATP-dependent_DNA_helicase_RecG	*	candidate	425	1.2e-12	T	6	Neisseria_gonorrhoeae_FA_1090_chromosome_<>Neisseria_meningitidis_MC58_chromosome_<>Neisseria_meningitidis_Z2491_chromosome_<>Neisseria_meningitidis_FAM18_chromosome_<>Neisseria_meningitidis_053442_chromosome_<>Neisseria_meningitidis_alpha14_chromosome_	RNA	-	10		Candidate_197_NC_011035(para),Candidate_413_NC_011035(para),Candidate_786_NC_011035(para),Candidate_787_NC_011035(para),Candidate_621_NC_011035(para),Candidate_131_NC_011035(para),Candidate_281_NC_011035(para),Candidate_282_NC_011035(para),Candidate_144_NC_011035(para),Candidate_291_NC_011035(para)	-	5	RS	-
Candidate_149_NC_011035	|	NGK_0163		hypothetical_protein	*	<<<	-1	|	130627	130695	<<<	68	|	0	<<<	NGK_0164	N-acetyl-gamma-glutamyl-phosphate_reductase	*	candidate	331	1.3e-08	B	6	Neisseria_gonorrhoeae_FA_1090_chromosome_<>Neisseria_meningitidis_MC58_chromosome_<>Neisseria_meningitidis_Z2491_chromosome_<>Neisseria_meningitidis_FAM18_chromosome_<>Neisseria_meningitidis_053442_chromosome_<>Neisseria_meningitidis_alpha14_chromosome_	-	-	1		Candidate_771_NC_011035(para)	-	53	-	-
Candidate_150_NC_011035	|	NGK_0167		hypothetical_protein	*	>>>	583	|	134007	134083	>>>	76	|	243	>>>	NGK_0168	putative_secretion_protein	*	candidate	300	4.5e-06	T	6	Neisseria_gonorrhoeae_FA_1090_chromosome_<>Neisseria_meningitidis_MC58_chromosome_<>Neisseria_meningitidis_Z2491_chromosome_<>Neisseria_meningitidis_FAM18_chromosome_<>Neisseria_meningitidis_053442_chromosome_<>Neisseria_meningitidis_alpha14_chromosome_	RNA	-	0	-	-	-	-	-	-
Candidate_151_NC_011035	|	NGK_0170		hypothetical_protein	*	>>>	19	|	136121	136179	>>>	58	|	23	>>>	NGK_0171	putative_protein_export_protein	*	candidate	220	0.00048	T	6	Neisseria_gonorrhoeae_FA_1090_chromosome_<>Neisseria_meningitidis_MC58_chromosome_<>Neisseria_meningitidis_Z2491_chromosome_<>Neisseria_meningitidis_FAM18_chromosome_<>Neisseria_meningitidis_053442_chromosome_<>Neisseria_meningitidis_alpha14_chromosome_	RNA	-	0	-	-	-	5	-	-
Candidate_152_NC_011035	|	NGK_0174		hypothetical_protein	*	>>>	1	|	139910	140100	>>>	190	|	33	>>>	NGK_0175	YbaX	*	candidate	1080	4.2e-43	T	4	Neisseria_meningitidis_MC58_chromosome_<>Neisseria_meningitidis_Z2491_chromosome_<>Neisseria_meningitidis_FAM18_chromosome_<>Neisseria_meningitidis_053442_chromosome_	RNA	-	0	-	-	-	5	-	-
Candidate_153_NC_011035	|	NGK_0177		putative_6-pyruvoyl-tetrahydropterin_synthase	*	>>>	1	|	141860	142070	>>>	210	|	58	>>>	NGK_0178	hypothetical_protein	*	candidate	109	0.002	T	6	Neisseria_gonorrhoeae_FA_1090_chromosome_<>Neisseria_meningitidis_MC58_chromosome_<>Neisseria_meningitidis_Z2491_chromosome_<>Neisseria_meningitidis_FAM18_chromosome_<>Neisseria_meningitidis_053442_chromosome_<>Neisseria_meningitidis_alpha14_chromosome_	RNA	-	49		Candidate_685_NC_011035(para),Candidate_603_NC_011035(para),Candidate_764_NC_011035(para),Candidate_749_NC_011035(para),Candidate_3_NC_011035(para),Candidate_527_NC_011035(para),Candidate_478_NC_011035(para),Candidate_672_NC_011035(para),Candidate_703_NC_011035(para),Candidate_640_NC_011035(para),Candidate_661_NC_011035(para),Candidate_491_NC_011035(para),Candidate_492_NC_011035(para),Candidate_4…	-	5	RS	-
Candidate_154_NC_011035	|	NGK_0179		hypothetical_protein	*	>>>	1	|	143134	143443	>>>	309	|	24	<<<	NGK_trnaPro1	tRNA-Pro	*	candidate	209	0.0023	T	5	Neisseria_meningitidis_MC58_chromosome_<>Neisseria_meningitidis_Z2491_chromosome_<>Neisseria_meningitidis_FAM18_chromosome_<>Neisseria_meningitidis_053442_chromosome_<>Neisseria_meningitidis_alpha14_chromosome_	COD	-	3		Candidate_446_NC_011035(para),Candidate_447_NC_011035(para),Candidate_241_NC_011035(para)	-	-	-	-
Candidate_155_NC_011035	|	NGK_0190		NhaC	*	>>>	8	|	152697	152818	<<<	121	|	12	<<<	NGK_0191	Magnesium_and_cobalt_transporter	*	candidate	567	3.2e-19	T	6	Neisseria_gonorrhoeae_FA_1090_chromosome_<>Neisseria_meningitidis_MC58_chromosome_<>Neisseria_meningitidis_Z2491_chromosome_<>Neisseria_meningitidis_FAM18_chromosome_<>Neisseria_meningitidis_053442_chromosome_<>Neisseria_meningitidis_alpha14_chromosome_	RNA	-	18		Candidate_156_NC_011035(anti),Candidate_306_NC_011035(para),Candidate_307_NC_011035(para),Candidate_420_NC_011035(para),Candidate_316_NC_011035(para),Candidate_317_NC_011035(para),Candidate_63_NC_011035(para),Candidate_220_NC_011035(para),Candidate_537_NC_011035(para),Candidate_446_NC_011035(para),Candidate_447_NC_011035(para),Candidate_115_NC_011035(para),Candidate_133_NC_011035(para),Candidate_…	-	-	-	-
Candidate_156_NC_011035	|	NGK_0190		NhaC	*	>>>	1	|	152690	152777	>>>	87	|	53	<<<	NGK_0191	Magnesium_and_cobalt_transporter	*	candidate	567	3.2e-19	T	6	Neisseria_gonorrhoeae_FA_1090_chromosome_<>Neisseria_meningitidis_MC58_chromosome_<>Neisseria_meningitidis_Z2491_chromosome_<>Neisseria_meningitidis_FAM18_chromosome_<>Neisseria_meningitidis_053442_chromosome_<>Neisseria_meningitidis_alpha14_chromosome_	RNA	-	18		Candidate_155_NC_011035(anti),Candidate_306_NC_011035(para),Candidate_307_NC_011035(para),Candidate_420_NC_011035(para),Candidate_316_NC_011035(para),Candidate_317_NC_011035(para),Candidate_63_NC_011035(para),Candidate_220_NC_011035(para),Candidate_537_NC_011035(para),Candidate_446_NC_011035(para),Candidate_447_NC_011035(para),Candidate_115_NC_011035(para),Candidate_133_NC_011035(para),Candidate_…	-	-	-	-
Candidate_157_NC_011035	|	NGK_0197		hypothetical_protein	*	>>>	17	|	157076	157156	>>>	80	|	-21	<<<	NGK_0198	hypothetical_protein	*	candidate	287	9.8e-07	T	6	Neisseria_gonorrhoeae_FA_1090_chromosome_<>Neisseria_meningitidis_MC58_chromosome_<>Neisseria_meningitidis_Z2491_chromosome_<>Neisseria_meningitidis_FAM18_chromosome_<>Neisseria_meningitidis_053442_chromosome_<>Neisseria_meningitidis_alpha14_chromosome_	-	-	1		Candidate_771_NC_011035(para)	-	-	-	-
Candidate_158_NC_011035	|	NGK_0208		hypothetical_protein	*	>>>	1	|	163822	163901	>>>	79	|	19	>>>	NGK_0209	hypothetical_protein	*	candidate	475	5e-15	T	6	Neisseria_gonorrhoeae_FA_1090_chromosome_<>Neisseria_meningitidis_MC58_chromosome_<>Neisseria_meningitidis_Z2491_chromosome_<>Neisseria_meningitidis_FAM18_chromosome_<>Neisseria_meningitidis_053442_chromosome_<>Neisseria_meningitidis_alpha14_chromosome_	-	-	0	-	-	-	5	-	-
Candidate_159_NC_011035	|	NGK_0212		IS1016_transposase	*	>>>	86	|	168360	168423	>>>	63	|	-17	<<<	NGK_0213	hypothetical_protein	*	candidate	231	0.00022	T	5	Neisseria_gonorrhoeae_FA_1090_chromosome_<>Neisseria_meningitidis_MC58_chromosome_<>Neisseria_meningitidis_Z2491_chromosome_<>Neisseria_meningitidis_FAM18_chromosome_<>Neisseria_meningitidis_053442_chromosome_	-	-	1		Candidate_771_NC_011035(para)	-	-	-	-
Candidate_160_NC_011035	|	NGK_0219		hypothetical_protein	*	<<<	221	|	171908	171986	<<<	78	|	0	<<<	NGK_0220	periplasmic_binding_protein_MntC	*	candidate	311	5.3e-08	T	5	Neisseria_meningitidis_MC58_chromosome_<>Neisseria_meningitidis_Z2491_chromosome_<>Neisseria_meningitidis_FAM18_chromosome_<>Neisseria_meningitidis_053442_chromosome_<>Neisseria_meningitidis_alpha14_chromosome_	-	-	1		Candidate_115_NC_011035(para)	-	3	-	-
Candidate_161_NC_011035	|	NGK_0242		hypothetical_protein	*	>>>	55	|	189271	189302	>>>	31	|	258	>>>	NGK_0243	Irg1	*	candidate	281	1.2e-06	T	11	Haemophilus_influenzae_Rd_KW20_chromosome_<>Neisseria_gonorrhoeae_FA_1090_chromosome_<>Neisseria_meningitidis_MC58_chromosome_<>Neisseria_meningitidis_Z2491_chromosome_<>Francisella_novicida_U112_chromosome_<>Neisseria_meningitidis_FAM18_chromosome_<>Haemophilus_influenzae_PittEE_chromosome_<>Neisseria_meningitidis_053442_chromosome_<>Neisseria_meningitidis_053442_chromosome_<>Francisella_philomi…	-	-	1		Candidate_111_NC_011035(anti),Candidate_804_NC_011035(para)	-	-	-	-
Candidate_162_NC_011035	|	NGK_0242		hypothetical_protein	*	>>>	246	|	189462	189605	>>>	143	|	-45	>>>	NGK_0243	Irg1	*	candidate	225	0.00091	T	8	Neisseria_gonorrhoeae_FA_1090_chromosome_<>Neisseria_meningitidis_MC58_chromosome_<>Neisseria_meningitidis_Z2491_chromosome_<>Neisseria_meningitidis_FAM18_chromosome_<>Neisseria_meningitidis_053442_chromosome_<>Francisella_philomiragia_subsp._philomiragia_ATCC_25017_chromosome_<>Neisseria_meningitidis_alpha14_chromosome_<>Aggregatibacter_actinomycetemcomitans_D11S-1_chromosome_	-	-	1		Candidate_771_NC_011035(para)	-	5	-	-
Candidate_163_NC_011035	|	NGK_0249		hypothetical_protein	*	>>>	0	|	196959	196998	<<<	39	|	845	<<<	NGK_0250	IS1016_transposase	*	candidate	128	0.0031	T	1	Haemophilus_influenzae_86-028NP_chromosome_	RNA	-	2		Candidate_684_NC_011035(tandem),Candidate_651_NC_011035(para)	-	-	-	-
Candidate_164_NC_011035	|	NGK_0254		hypothetical_protein	*	>>>	1	|	204769	204859	>>>	90	|	-31	<<<	NGK_0256	MtrA	*	candidate	278	7.5e-06	T	5	Neisseria_gonorrhoeae_FA_1090_chromosome_<>Neisseria_meningitidis_MC58_chromosome_<>Neisseria_meningitidis_Z2491_chromosome_<>Neisseria_meningitidis_FAM18_chromosome_<>Neisseria_meningitidis_alpha14_chromosome_	RNA	-	1		Candidate_771_NC_011035(para)	-	-	-	-
Candidate_165_NC_011035	|	NGK_0254		hypothetical_protein	*	>>>	1	|	204769	204841	>>>	72	|	-13	<<<	NGK_0256	MtrA	*	candidate	278	7.5e-06	T	5	Neisseria_gonorrhoeae_FA_1090_chromosome_<>Neisseria_meningitidis_MC58_chromosome_<>Neisseria_meningitidis_Z2491_chromosome_<>Neisseria_meningitidis_FAM18_chromosome_<>Neisseria_meningitidis_alpha14_chromosome_	-	-	1		Candidate_771_NC_011035(para)	-	-	-	-
Candidate_166_NC_011035	|	NGK_0261		putative_periplasmic_protease	*	>>>	1	|	209273	209349	>>>	76	|	-28	<<<	NGK_0262	Integral_membrane_protein	*	candidate	241	0.00043	T	6	Neisseria_gonorrhoeae_FA_1090_chromosome_<>Neisseria_meningitidis_MC58_chromosome_<>Neisseria_meningitidis_Z2491_chromosome_<>Neisseria_meningitidis_FAM18_chromosome_<>Neisseria_meningitidis_053442_chromosome_<>Neisseria_meningitidis_alpha14_chromosome_	-	-	1		Candidate_771_NC_011035(para)	-	-	-	-
Candidate_167_NC_011035	|	NGK_0276		ketol-acid_reductoisomerase	*	>>>	1	|	222251	222316	>>>	65	|	51	<<<	NGK_0277	ornithine_carbamoyltransferase	*	candidate	236	3e-19	B	6	Neisseria_gonorrhoeae_FA_1090_chromosome_<>Neisseria_meningitidis_MC58_chromosome_<>Neisseria_meningitidis_Z2491_chromosome_<>Neisseria_meningitidis_FAM18_chromosome_<>Neisseria_meningitidis_053442_chromosome_<>Neisseria_meningitidis_alpha14_chromosome_	RNA	-	0	-	-	-	-	-	-
Candidate_168_NC_011035	|	NGK_0276		ketol-acid_reductoisomerase	*	>>>	1	|	222251	222358	>>>	107	|	9	<<<	NGK_0277	ornithine_carbamoyltransferase	*	candidate	236	3e-19	T	6	Neisseria_gonorrhoeae_FA_1090_chromosome_<>Neisseria_meningitidis_MC58_chromosome_<>Neisseria_meningitidis_Z2491_chromosome_<>Neisseria_meningitidis_FAM18_chromosome_<>Neisseria_meningitidis_053442_chromosome_<>Neisseria_meningitidis_alpha14_chromosome_	RNA	-	0	-	-	-	-	-	-
Candidate_169_NC_011035	|	NGK_0288		hypothetical_protein	*	>>>	152	|	233860	234004	>>>	144	|	225	>>>	NGK_0289	putative_GntR-family_transcriptional_regulator	*	candidate	153	0.0036	T	6	Neisseria_gonorrhoeae_FA_1090_chromosome_<>Neisseria_meningitidis_MC58_chromosome_<>Neisseria_meningitidis_Z2491_chromosome_<>Neisseria_meningitidis_FAM18_chromosome_<>Neisseria_meningitidis_053442_chromosome_<>Neisseria_meningitidis_alpha14_chromosome_	RNA	-	3		Candidate_722_NC_011035(anti),Candidate_733_NC_011035(para),Candidate_316_NC_011035(para),Candidate_317_NC_011035(para)	-	-	-	-E.coli_sig70_3(7.82|-74)
Candidate_170_NC_011035	|	NGK_0294		glutaminyl-tRNA_synthetase	*	>>>	1	|	238616	238683	>>>	67	|	22	>>>	NGK_0295	glutathione_synthetase	*	candidate	428	8.3e-13	T	6	Neisseria_gonorrhoeae_FA_1090_chromosome_<>Neisseria_meningitidis_MC58_chromosome_<>Neisseria_meningitidis_Z2491_chromosome_<>Neisseria_meningitidis_FAM18_chromosome_<>Neisseria_meningitidis_053442_chromosome_<>Neisseria_meningitidis_alpha14_chromosome_	-	-	0	-	-	-	5	-	-
Candidate_171_NC_011035	|	NGK_0297		hypothetical_protein	*	>>>	1	|	240811	240902	>>>	91	|	-17	>>>	NGK_0298	tRNA-specific_2-thiouridylase_MnmA	*	candidate	362	5.9e-10	T	6	Neisseria_gonorrhoeae_FA_1090_chromosome_<>Neisseria_meningitidis_MC58_chromosome_<>Neisseria_meningitidis_Z2491_chromosome_<>Neisseria_meningitidis_FAM18_chromosome_<>Neisseria_meningitidis_053442_chromosome_<>Neisseria_meningitidis_alpha14_chromosome_	RNA	-	1		Candidate_771_NC_011035(para)	-	5	RS	-
Candidate_172_NC_011035	|	NGK_0314		anthranilate_phosphoribosyltransferase	*	>>>	22	|	257322	257512	<<<	190	|	0	<<<	NGK_0315	IS1106_transposase	*	candidate	205	0.0044	T	6	Neisseria_gonorrhoeae_FA_1090_chromosome_<>Neisseria_meningitidis_MC58_chromosome_<>Neisseria_meningitidis_Z2491_chromosome_<>Neisseria_meningitidis_FAM18_chromosome_<>Neisseria_meningitidis_053442_chromosome_<>Neisseria_meningitidis_alpha14_chromosome_	RNA	-	5		Candidate_30_NC_011035(para),Candidate_791_NC_011035(para),Candidate_446_NC_011035(para),Candidate_447_NC_011035(para),Candidate_288_NC_011035(para)	-	-	-	-
Candidate_173_NC_011035	|	NGK_0315		IS1106_transposase	*	<<<	0	|	257963	258105	<<<	142	|	0	<<<	NGK_0316	Histone_deacetylase_family_protein	*	candidate	208	0.0023	T	6	Neisseria_gonorrhoeae_FA_1090_chromosome_<>Neisseria_meningitidis_MC58_chromosome_<>Neisseria_meningitidis_Z2491_chromosome_<>Neisseria_meningitidis_FAM18_chromosome_<>Neisseria_meningitidis_053442_chromosome_<>Neisseria_meningitidis_alpha14_chromosome_	RNA	-	2		Candidate_416_NC_011035(para),Candidate_627_NC_011035(para)	-	5	RS	-E.coli_sig70_1(7.27|-37)
Candidate_174_NC_011035	|	NGK_0317		hypothetical_protein	*	>>>	1	|	259623	259693	>>>	70	|	136	>>>	NGK_0318	preprotein_translocase_subunit_SecD	*	candidate	986	2.3e-38	T	6	Neisseria_gonorrhoeae_FA_1090_chromosome_<>Neisseria_meningitidis_MC58_chromosome_<>Neisseria_meningitidis_Z2491_chromosome_<>Neisseria_meningitidis_FAM18_chromosome_<>Neisseria_meningitidis_053442_chromosome_<>Neisseria_meningitidis_alpha14_chromosome_	-	-	0	-	-	-	-	-	-
Candidate_175_NC_011035	|	NGK_0319		preprotein_translocase_subunit_SecF	*	>>>	6	|	262632	262719	>>>	87	|	110	>>>	NGK_0320	30S_ribosomal_protein_S15	*	candidate	432	2.3e-13	T	5	Neisseria_gonorrhoeae_FA_1090_chromosome_<>Neisseria_meningitidis_MC58_chromosome_<>Neisseria_meningitidis_Z2491_chromosome_<>Neisseria_meningitidis_FAM18_chromosome_<>Neisseria_meningitidis_alpha14_chromosome_	RNA	-	1		Candidate_537_NC_011035(para)	-	-	-	-
Candidate_176_NC_011035	|	NGK_0319		preprotein_translocase_subunit_SecF	*	>>>	6	|	262632	262826	>>>	194	|	3	>>>	NGK_0320	30S_ribosomal_protein_S15	*	candidate	432	2.3e-13	B	5	Neisseria_gonorrhoeae_FA_1090_chromosome_<>Neisseria_meningitidis_MC58_chromosome_<>Neisseria_meningitidis_Z2491_chromosome_<>Neisseria_meningitidis_FAM18_chromosome_<>Neisseria_meningitidis_alpha14_chromosome_	RNA	-	1		Candidate_537_NC_011035(para)	-	5	RS	-
Candidate_177_NC_011035	|	NGK_0320		30S_ribosomal_protein_S15	*	>>>	1	|	263101	263165	>>>	64	|	75	>>>	NGK_0321	Spermidine/putrescine_ABC_transporter,_ATP-binding	*	candidate	390	1.7e-11	T	5	Neisseria_gonorrhoeae_FA_1090_chromosome_<>Neisseria_meningitidis_MC58_chromosome_<>Neisseria_meningitidis_Z2491_chromosome_<>Neisseria_meningitidis_FAM18_chromosome_<>Neisseria_meningitidis_053442_chromosome_	-	-	0	-	-	-	5	-	-
Candidate_178_NC_011035	|	NGK_0320		30S_ribosomal_protein_S15	*	>>>	1	|	263101	263253	>>>	152	|	-13	>>>	NGK_0321	Spermidine/putrescine_ABC_transporter,_ATP-binding	*	candidate	390	1.7e-11	B	5	Neisseria_gonorrhoeae_FA_1090_chromosome_<>Neisseria_meningitidis_MC58_chromosome_<>Neisseria_meningitidis_Z2491_chromosome_<>Neisseria_meningitidis_FAM18_chromosome_<>Neisseria_meningitidis_053442_chromosome_	-	-	1		Candidate_771_NC_011035(para)	-	5	-	-
Candidate_179_NC_011035	|	NGK_0324		Spermidine/putrescine_ABC_transporter,_permease_pr	*	>>>	1	|	266371	266441	>>>	70	|	54	>>>	NGK_0325	putative_oxidoreductase	*	candidate	597	1.4e-20	T	3	Neisseria_meningitidis_Z2491_chromosome_<>Neisseria_meningitidis_FAM18_chromosome_<>Neisseria_meningitidis_053442_chromosome_	RNA	-	0	-	-	-	5	-	-
Candidate_180_NC_011035	|	NGK_0333		hypothetical_protein	*	>>>	1	|	275625	275715	>>>	90	|	-7	<<<	NGK_0334	putative_phosphatase	*	candidate	116	1.2e-11	T	6	Neisseria_gonorrhoeae_FA_1090_chromosome_<>Neisseria_meningitidis_MC58_chromosome_<>Neisseria_meningitidis_Z2491_chromosome_<>Neisseria_meningitidis_FAM18_chromosome_<>Neisseria_meningitidis_053442_chromosome_<>Neisseria_meningitidis_alpha14_chromosome_	RNA	-	1		Candidate_771_NC_011035(para)	-	-	-	-
Candidate_181_NC_011035	|	NGK_0336		LolA	*	>>>	1	|	278244	278330	>>>	86	|	-36	<<<	NGK_0337	hypothetical_protein	*	candidate	242	7.1e-05	T	6	Neisseria_gonorrhoeae_FA_1090_chromosome_<>Neisseria_meningitidis_MC58_chromosome_<>Neisseria_meningitidis_Z2491_chromosome_<>Neisseria_meningitidis_FAM18_chromosome_<>Neisseria_meningitidis_053442_chromosome_<>Neisseria_meningitidis_alpha14_chromosome_	-	-	1		Candidate_771_NC_011035(para)	-	-	-	-
Candidate_182_NC_011035	|	NGK_0340		hypothetical_protein	*	>>>	1	|	281354	281542	>>>	188	|	-23	<<<	NGK_0341	peptide_chain_release_factor_3	*	candidate	639	6.2e-23	T	6	Neisseria_gonorrhoeae_FA_1090_chromosome_<>Neisseria_meningitidis_MC58_chromosome_<>Neisseria_meningitidis_Z2491_chromosome_<>Neisseria_meningitidis_FAM18_chromosome_<>Neisseria_meningitidis_053442_chromosome_<>Neisseria_meningitidis_alpha14_chromosome_	RNA	-	1		Candidate_771_NC_011035(para)	-	-	-	-
Candidate_183_NC_011035	|	NGK_0374		Malate_oxidoreductase	*	>>>	1	|	313617	313691	>>>	74	|	78	>>>	NGK_0375	hypothetical_protein	*	candidate	273	2.9e-06	T	6	Neisseria_gonorrhoeae_FA_1090_chromosome_<>Neisseria_meningitidis_MC58_chromosome_<>Neisseria_meningitidis_Z2491_chromosome_<>Neisseria_meningitidis_FAM18_chromosome_<>Neisseria_meningitidis_053442_chromosome_<>Neisseria_meningitidis_alpha14_chromosome_	RNA	-	20		Candidate_731_NC_011035(anti),Candidate_621_NC_011035(para),Candidate_342_NC_011035(para),Candidate_576_NC_011035(para),Candidate_577_NC_011035(para),Candidate_427_NC_011035(para),Candidate_632_NC_011035(para),Candidate_221_NC_011035(para),Candidate_412_NC_011035(para),Candidate_373_NC_011035(para),Candidate_599_NC_011035(para),Candidate_540_NC_011035(para),Candidate_541_NC_011035(para),Candidate…	-	5	RS	-
Candidate_184_NC_011035	|	NGK_0384		acetyl-CoA_carboxylase_subunit_beta	*	>>>	1	|	319706	319785	>>>	79	|	-22	<<<	NGK_0385	cryptic_protein	*	candidate	268	2.2e-05	T	6	Neisseria_gonorrhoeae_FA_1090_chromosome_<>Neisseria_meningitidis_MC58_chromosome_<>Neisseria_meningitidis_Z2491_chromosome_<>Neisseria_meningitidis_FAM18_chromosome_<>Neisseria_meningitidis_053442_chromosome_<>Neisseria_meningitidis_alpha14_chromosome_	-	-	1		Candidate_771_NC_011035(para)	-	-	-	-
Candidate_185_NC_011035	|	NGK_0392		dihydroorotase	*	>>>	16	|	323479	323539	>>>	60	|	1	<<<	NGK_0393	transcription_antitermination_protein_NusB	*	candidate	201	0.0038	T	6	Neisseria_gonorrhoeae_FA_1090_chromosome_<>Neisseria_meningitidis_MC58_chromosome_<>Neisseria_meningitidis_Z2491_chromosome_<>Neisseria_meningitidis_FAM18_chromosome_<>Neisseria_meningitidis_053442_chromosome_<>Neisseria_meningitidis_alpha14_chromosome_	RNA	-	42		Candidate_621_NC_011035(para),Candidate_373_NC_011035(para),Candidate_599_NC_011035(para),Candidate_197_NC_011035(para),Candidate_514_NC_011035(para),Candidate_688_NC_011035(para),Candidate_412_NC_011035(para),Candidate_143_NC_011035(para),Candidate_608_NC_011035(para),Candidate_523_NC_011035(para),Candidate_691_NC_011035(para),Candidate_142_NC_011035(para),Candidate_569_NC_011035(para),Candidate…	-	-	-	-
Candidate_186_NC_011035	|	NGK_0398		GTP-binding_protein_Era	*	>>>	12	|	326760	326831	>>>	71	|	68	>>>	NGK_0399	lactoferrin_binding_protein_B_precursor	*	candidate	305	3.1e-07	T	6	Neisseria_gonorrhoeae_FA_1090_chromosome_<>Neisseria_meningitidis_MC58_chromosome_<>Neisseria_meningitidis_Z2491_chromosome_<>Neisseria_meningitidis_FAM18_chromosome_<>Neisseria_meningitidis_053442_chromosome_<>Neisseria_meningitidis_alpha14_chromosome_	RNA	-	23		Candidate_197_NC_011035(para),Candidate_572_NC_011035(para),Candidate_427_NC_011035(para),Candidate_632_NC_011035(para),Candidate_621_NC_011035(para),Candidate_540_NC_011035(para),Candidate_541_NC_011035(para),Candidate_373_NC_011035(para),Candidate_599_NC_011035(para),Candidate_514_NC_011035(para),Candidate_688_NC_011035(para),Candidate_183_NC_011035(para),Candidate_731_NC_011035(para),Candidate…	-	5	RS	-
Candidate_187_NC_011035	|	NGK_0418		tryptophan_synthase_subunit_beta	*	>>>	2	|	344022	344102	>>>	80	|	-8	<<<	NGK_0419	IgA-specific_metalloendopeptidase	*	candidate	296	4e-07	T	6	Neisseria_gonorrhoeae_FA_1090_chromosome_<>Neisseria_meningitidis_MC58_chromosome_<>Neisseria_meningitidis_Z2491_chromosome_<>Neisseria_meningitidis_FAM18_chromosome_<>Neisseria_meningitidis_053442_chromosome_<>Neisseria_meningitidis_alpha14_chromosome_	-	-	1		Candidate_771_NC_011035(para)	-	-	-	-
Candidate_188_NC_011035	|	NGK_0421		ComA	*	>>>	-18	|	351464	351538	<<<	74	|	12	<<<	NGK_0422	ComL,_competence_lipoprotein	*	candidate	217	0.0011	T	3	Neisseria_gonorrhoeae_FA_1090_chromosome_<>Neisseria_meningitidis_MC58_chromosome_<>Neisseria_meningitidis_Z2491_chromosome_	-	-	1		Candidate_771_NC_011035(para)	-	-	-	-
Candidate_189_NC_011035	|	NGK_0421		ComA	*	>>>	18	|	351500	351568	>>>	68	|	-18	<<<	NGK_0422	ComL,_competence_lipoprotein	*	candidate	233	0.00086	T	3	Neisseria_gonorrhoeae_FA_1090_chromosome_<>Neisseria_meningitidis_MC58_chromosome_<>Neisseria_meningitidis_Z2491_chromosome_	-	-	1		Candidate_771_NC_011035(para)	-	-	-	-
Candidate_190_NC_011035	|	NGK_0432		Membrane_protein	*	>>>	1	|	358475	358569	>>>	94	|	-6	<<<	NGK_0433	hypothetical_protein	*	candidate	450	8.6e-14	T	1	Neisseria_gonorrhoeae_FA_1090_chromosome_	RNA	-	1		Candidate_771_NC_011035(para)	-	-	-	-
Candidate_191_NC_011035	|	NGK_0435		UPF0114_protein	*	>>>	1	|	360124	360195	>>>	71	|	-15	<<<	NGK_0436	RNA_polymerase_factor_sigma-32	*	candidate	245	2.9e-05	T	5	Neisseria_gonorrhoeae_FA_1090_chromosome_<>Neisseria_meningitidis_MC58_chromosome_<>Neisseria_meningitidis_FAM18_chromosome_<>Neisseria_meningitidis_053442_chromosome_<>Neisseria_meningitidis_alpha14_chromosome_	-	-	1		Candidate_771_NC_011035(para)	-	-	-	-
Candidate_192_NC_011035	|	NGK_0444		translation_initiation_factor_3	*	>>>	1	|	371204	371278	>>>	74	|	-11	>>>	NGK_0445	putative_50S_ribosomal_protein_L35	*	candidate	316	6e-08	T	6	Neisseria_gonorrhoeae_FA_1090_chromosome_<>Neisseria_meningitidis_MC58_chromosome_<>Neisseria_meningitidis_Z2491_chromosome_<>Neisseria_meningitidis_FAM18_chromosome_<>Neisseria_meningitidis_053442_chromosome_<>Neisseria_meningitidis_alpha14_chromosome_	-	-	1		Candidate_771_NC_011035(para)	-	5	-	-E.coli_sig70_2(7.76|-66)
Candidate_193_NC_011035	|	NGK_0456		FxsA	*	>>>	1	|	378717	378780	>>>	63	|	568	>>>	NGK_0457	Adenosylmethionine-8-amino-7-oxononanoate_aminotra	*	candidate	119	0.0047	T	6	Neisseria_gonorrhoeae_FA_1090_chromosome_<>Neisseria_meningitidis_MC58_chromosome_<>Neisseria_meningitidis_Z2491_chromosome_<>Neisseria_meningitidis_FAM18_chromosome_<>Neisseria_meningitidis_053442_chromosome_<>Neisseria_meningitidis_alpha14_chromosome_	RNA	-	8		Candidate_356_NC_011035(para),Candidate_486_NC_011035(para),Candidate_362_NC_011035(para),Candidate_590_NC_011035(para),Candidate_650_NC_011035(para),Candidate_726_NC_011035(para),Candidate_551_NC_011035(para),Candidate_552_NC_011035(para)	-	-	-	-
Candidate_194_NC_011035	|	NGK_0456		FxsA	*	>>>	1	|	378717	378858	>>>	141	|	490	>>>	NGK_0457	Adenosylmethionine-8-amino-7-oxononanoate_aminotra	*	candidate	119	0.0047	T	6	Neisseria_gonorrhoeae_FA_1090_chromosome_<>Neisseria_meningitidis_MC58_chromosome_<>Neisseria_meningitidis_Z2491_chromosome_<>Neisseria_meningitidis_FAM18_chromosome_<>Neisseria_meningitidis_053442_chromosome_<>Neisseria_meningitidis_alpha14_chromosome_	RNA	-	25		Candidate_356_NC_011035(para),Candidate_486_NC_011035(para),Candidate_281_NC_011035(para),Candidate_733_NC_011035(para),Candidate_362_NC_011035(para),Candidate_590_NC_011035(para),Candidate_650_NC_011035(para),Candidate_726_NC_011035(para),Candidate_710_NC_011035(para),Candidate_280_NC_011035(para),Candidate_789_NC_011035(para),Candidate_699_NC_011035(para),Candidate_551_NC_011035(para),Candidate…	-	-	-	-
Candidate_195_NC_011035	|	NGK_trnaGlu1		tRNA-Glu	*	>>>	32	|	389525	389571	>>>	46	|	303	>>>	NGK_0468	hypothetical_protein	*	candidate	228	0.00057	T	11	Neisseria_gonorrhoeae_FA_1090_chromosome_<>Neisseria_meningitidis_MC58_chromosome_<>Neisseria_meningitidis_Z2491_chromosome_<>Methanosarcina_acetivorans_C2A_chromosome_<>Methanosarcina_mazei_Go1_chromosome_<>Neisseria_meningitidis_FAM18_chromosome_<>Roseiflexus_sp._RS-1_chromosome_<>Neisseria_meningitidis_053442_chromosome_<>Opitutus_terrae_PB90-1_chromosome_<>Neisseria_meningitidis_alpha14_chrom…	-	-	1		Candidate_196_NC_011035(tandem)	-	-	-	-
Candidate_196_NC_011035	|	NGK_trnaGlu1		tRNA-Glu	*	>>>	2	|	389495	389816	>>>	321	|	58	>>>	NGK_0468	hypothetical_protein	*	candidate	243	4.8e-05	T	6	Neisseria_gonorrhoeae_FA_1090_chromosome_<>Neisseria_meningitidis_MC58_chromosome_<>Neisseria_meningitidis_Z2491_chromosome_<>Neisseria_meningitidis_FAM18_chromosome_<>Neisseria_meningitidis_053442_chromosome_<>Neisseria_meningitidis_alpha14_chromosome_	RNA	-	2		Candidate_195_NC_011035(tandem),Candidate_426_NC_011035(para)	-	5	RS	-
Candidate_197_NC_011035	|	NGK_0471		ubiquinone/menaquinone_biosynthesis_methyltransfer	*	>>>	41	|	392950	392988	>>>	38	|	139	>>>	NGK_0472	hypothetical_protein	*	candidate	211	0.0021	T	12	Neisseria_gonorrhoeae_FA_1090_chromosome_<>Neisseria_meningitidis_MC58_chromosome_<>Neisseria_meningitidis_Z2491_chromosome_<>Bacillus_anthracis_str._Ames_chromosome_<>Neisseria_meningitidis_FAM18_chromosome_<>Acinetobacter_baumannii_ATCC_17978_chromosome_<>Neisseria_meningitidis_053442_chromosome_<>Acinetobacter_baumannii_AYE_chromosome_<>Acinetobacter_baumannii_ACICU_chromosome_<>Acinetobacter_…	RNA	-	30		Candidate_186_NC_011035(para),Candidate_621_NC_011035(para),Candidate_316_NC_011035(para),Candidate_317_NC_011035(para),Candidate_342_NC_011035(para),Candidate_576_NC_011035(para),Candidate_577_NC_011035(para),Candidate_578_NC_011035(para),Candidate_412_NC_011035(para),Candidate_413_NC_011035(para),Candidate_148_NC_011035(para),Candidate_221_NC_011035(para),Candidate_185_NC_011035(para),Candidate…	-	-	-	-
Candidate_198_NC_011035	|	NGK_0481		Bacterioferritin_comigratory_protein	*	>>>	1	|	397441	397507	>>>	66	|	-17	>>>	NGK_0482	XerD	*	candidate	237	0.00064	T	6	Neisseria_gonorrhoeae_FA_1090_chromosome_<>Neisseria_meningitidis_MC58_chromosome_<>Neisseria_meningitidis_Z2491_chromosome_<>Neisseria_meningitidis_FAM18_chromosome_<>Neisseria_meningitidis_053442_chromosome_<>Neisseria_meningitidis_alpha14_chromosome_	-	-	1		Candidate_771_NC_011035(para)	-	5	-	-
Candidate_199_NC_011035	|	NGK_0489		polynucleotide_phosphorylase/polyadenylase	*	>>>	1	|	403786	403858	>>>	72	|	-2	<<<	NGK_0490	hypothetical_protein	*	candidate	342	8.2e-09	T	6	Neisseria_gonorrhoeae_FA_1090_chromosome_<>Neisseria_meningitidis_MC58_chromosome_<>Neisseria_meningitidis_Z2491_chromosome_<>Neisseria_meningitidis_FAM18_chromosome_<>Neisseria_meningitidis_053442_chromosome_<>Neisseria_meningitidis_alpha14_chromosome_	-	-	1		Candidate_771_NC_011035(para)	-	-	-	-
Candidate_200_NC_011035	|	NGK_0494		Cysteine_synthase	*	>>>	1	|	407556	407673	>>>	117	|	-62	>>>	NGK_0495	hypothetical_protein	*	candidate	285	4.8e-07	T	6	Neisseria_gonorrhoeae_FA_1090_chromosome_<>Neisseria_meningitidis_MC58_chromosome_<>Neisseria_meningitidis_Z2491_chromosome_<>Neisseria_meningitidis_FAM18_chromosome_<>Neisseria_meningitidis_053442_chromosome_<>Neisseria_meningitidis_alpha14_chromosome_	RNA	-	1		Candidate_771_NC_011035(para)	-	5	RS	-
Candidate_201_NC_011035	|	NGK_0499		hypothetical_protein	*	>>>	1	|	409203	409404	>>>	201	|	-4	<<<	NGK_0500	Lep	*	candidate	95	0.0045	T	6	Neisseria_gonorrhoeae_FA_1090_chromosome_<>Neisseria_meningitidis_MC58_chromosome_<>Neisseria_meningitidis_Z2491_chromosome_<>Neisseria_meningitidis_FAM18_chromosome_<>Neisseria_meningitidis_053442_chromosome_<>Neisseria_meningitidis_alpha14_chromosome_	RNA	-	1		Candidate_771_NC_011035(para)	-	-	-	-
Candidate_202_NC_011035	|	NGK_0511		hypothetical_protein	*	>>>	1	|	418379	418448	>>>	69	|	97	>>>	NGK_0512	hypothetical_protein	*	candidate	411	1.8e-12	T	6	Neisseria_gonorrhoeae_FA_1090_chromosome_<>Neisseria_meningitidis_MC58_chromosome_<>Neisseria_meningitidis_Z2491_chromosome_<>Neisseria_meningitidis_FAM18_chromosome_<>Neisseria_meningitidis_053442_chromosome_<>Neisseria_meningitidis_alpha14_chromosome_	RNA	-	3		Candidate_131_NC_011035(para),Candidate_142_NC_011035(para),Candidate_569_NC_011035(para)	-	-	RS	-
Candidate_203_NC_011035	|	NGK_0511		hypothetical_protein	*	>>>	1	|	418379	418468	>>>	89	|	77	>>>	NGK_0512	hypothetical_protein	*	candidate	411	1.8e-12	T	6	Neisseria_gonorrhoeae_FA_1090_chromosome_<>Neisseria_meningitidis_MC58_chromosome_<>Neisseria_meningitidis_Z2491_chromosome_<>Neisseria_meningitidis_FAM18_chromosome_<>Neisseria_meningitidis_053442_chromosome_<>Neisseria_meningitidis_alpha14_chromosome_	RNA	-	3		Candidate_131_NC_011035(para),Candidate_142_NC_011035(para),Candidate_569_NC_011035(para)	-	5	RS	-
Candidate_204_NC_011035	|	NGK_0519		uroporphyrinogen_decarboxylase	*	>>>	1	|	426196	426289	>>>	93	|	-33	<<<	NGK_0520	Putative_stress-sensitive_restriction_system_prote	*	candidate	301	6.7e-07	T	2	Neisseria_gonorrhoeae_FA_1090_chromosome_<>Neisseria_meningitidis_053442_chromosome_	RNA	-	1		Candidate_771_NC_011035(para)	-	-	-	-
Candidate_205_NC_011035	|	NGK_0532		Amino_acid_ABC_transporter,_ATP-binding_protein	*	>>>	1	|	440540	440611	>>>	71	|	-18	<<<	NGK_0533	Pgm	*	candidate	275	1.1e-05	T	1	Neisseria_gonorrhoeae_FA_1090_chromosome_	-	-	1		Candidate_771_NC_011035(para)	-	-	-	-
Candidate_206_NC_011035	|	NGK_0545		delta-aminolevulinic_acid_dehydratase	*	>>>	1	|	450830	450915	>>>	85	|	-24	<<<	NGK_0546	putative_lyase	*	candidate	291	1.9e-06	T	3	Neisseria_gonorrhoeae_FA_1090_chromosome_<>Neisseria_meningitidis_Z2491_chromosome_<>Neisseria_meningitidis_FAM18_chromosome_	-	-	1		Candidate_771_NC_011035(para)	-	-	-	-
Candidate_207_NC_011035	|	NGK_0548		putative_oxidoreductase,_NAD(P)H-flavin	*	>>>	1	|	453889	453965	>>>	76	|	-24	<<<	NGK_0549	RNA-binding_protein	*	candidate	234	0.00082	T	6	Neisseria_gonorrhoeae_FA_1090_chromosome_<>Neisseria_meningitidis_MC58_chromosome_<>Neisseria_meningitidis_Z2491_chromosome_<>Neisseria_meningitidis_FAM18_chromosome_<>Neisseria_meningitidis_053442_chromosome_<>Neisseria_meningitidis_alpha14_chromosome_	-	-	1		Candidate_771_NC_011035(para)	-	-	-	-
Candidate_208_NC_011035	|	NGK_0555		multidrug_efflux_protein	*	<<<	14	|	460222	460263	<<<	41	|	110	<<<	NGK_0556	transcriptional_regulatory_protein	*	candidate	265	3.2e-05	B	5	Neisseria_gonorrhoeae_FA_1090_chromosome_<>Neisseria_meningitidis_Z2491_chromosome_<>Neisseria_meningitidis_FAM18_chromosome_<>Neisseria_meningitidis_053442_chromosome_<>Neisseria_meningitidis_alpha14_chromosome_	-	-	1		Candidate_743_NC_011035(tandem)	-	5	-	-E.coli_sig70_3(7.22|-60)
Candidate_209_NC_011035	|	NGK_0558		adenylosuccinate_synthetase	*	>>>	11	|	463108	463185	>>>	77	|	21	>>>	NGK_0559	hypothetical_protein	*	candidate	220	0.0013	T	3	Neisseria_gonorrhoeae_FA_1090_chromosome_<>Neisseria_meningitidis_MC58_chromosome_<>Neisseria_meningitidis_FAM18_chromosome_	RNA	-	19		Candidate_306_NC_011035(para),Candidate_307_NC_011035(para),Candidate_420_NC_011035(para),Candidate_316_NC_011035(para),Candidate_317_NC_011035(para),Candidate_339_NC_011035(para),Candidate_340_NC_011035(para),Candidate_446_NC_011035(para),Candidate_447_NC_011035(para),Candidate_526_NC_011035(para),Candidate_537_NC_011035(para),Candidate_220_NC_011035(para),Candidate_453_NC_011035(para),Candidate…	-	5	RS	-
Candidate_210_NC_011035	|	NGK_0562		adenylate_kinase	*	>>>	103	|	465137	465371	>>>	234	|	185	>>>	NGK_0563	orotidine_5_-phosphate_decarboxylase	*	candidate	228	0.0026	T	7	Neisseria_gonorrhoeae_FA_1090_chromosome_<>Neisseria_meningitidis_MC58_chromosome_<>Neisseria_meningitidis_Z2491_chromosome_<>Neisseria_meningitidis_FAM18_chromosome_<>Shewanella_putrefaciens_CN-32_chromosome_<>Neisseria_meningitidis_053442_chromosome_<>Neisseria_meningitidis_alpha14_chromosome_	RNA	-	19		Candidate_407_NC_011035(para),Candidate_615_NC_011035(para),Candidate_281_NC_011035(para),Candidate_282_NC_011035(para),Candidate_52_NC_011035(para),Candidate_651_NC_011035(para),Candidate_325_NC_011035(para),Candidate_125_NC_011035(para),Candidate_759_NC_011035(para),Candidate_602_NC_011035(para),Candidate_678_NC_011035(para),Candidate_534_NC_011035(para),Candidate_701_NC_011035(para),Candidate_…	-	-	-	-
Candidate_211_NC_011035	|	NGK_0562		adenylate_kinase	*	>>>	103	|	465137	465518	>>>	381	|	38	>>>	NGK_0563	orotidine_5_-phosphate_decarboxylase	*	candidate	228	0.0026	T	7	Neisseria_gonorrhoeae_FA_1090_chromosome_<>Neisseria_meningitidis_MC58_chromosome_<>Neisseria_meningitidis_Z2491_chromosome_<>Neisseria_meningitidis_FAM18_chromosome_<>Shewanella_putrefaciens_CN-32_chromosome_<>Neisseria_meningitidis_053442_chromosome_<>Neisseria_meningitidis_alpha14_chromosome_	RNA	-	51		Candidate_407_NC_011035(para),Candidate_527_NC_011035(para),Candidate_615_NC_011035(para),Candidate_622_NC_011035(para),Candidate_623_NC_011035(para),Candidate_693_NC_011035(para),Candidate_376_NC_011035(para),Candidate_603_NC_011035(para),Candidate_464_NC_011035(para),Candidate_478_NC_011035(para),Candidate_672_NC_011035(para),Candidate_702_NC_011035(para),Candidate_676_NC_011035(para),Candidate…	-	5	RS	-
Candidate_212_NC_011035	|	NGK_0565		ADP-L-glycero-D-manno-heptose-6-epimerase	*	>>>	1	|	468385	468450	>>>	65	|	7	>>>	NGK_0566	Type_I_restriction_enzyme_EcoR124II_M_protein	*	candidate	331	2.6e-08	B	5	Neisseria_gonorrhoeae_FA_1090_chromosome_<>Neisseria_meningitidis_MC58_chromosome_<>Neisseria_meningitidis_Z2491_chromosome_<>Neisseria_meningitidis_053442_chromosome_<>Neisseria_meningitidis_alpha14_chromosome_	RNA	-	0	-	-	-	5	-	-
Candidate_213_NC_011035	|	NGK_0569		Type_i_restriction_enzyme_EcoR124II_specificity_pr	*	>>>	1	|	471329	471521	>>>	192	|	-63	<<<	NGK_0570	Sensor_protein	*	candidate	655	1.9e-23	T	1	Neisseria_gonorrhoeae_FA_1090_chromosome_	RNA	-	1		Candidate_771_NC_011035(para)	-	-	-	-
Candidate_215_NC_011035	|	NGK_0583		Periplasmic_protein	*	>>>	1	|	485791	485875	>>>	84	|	18	<<<	NGK_0584	PhoH-related_protein	*	candidate	469	1e-14	T	6	Neisseria_gonorrhoeae_FA_1090_chromosome_<>Neisseria_meningitidis_MC58_chromosome_<>Neisseria_meningitidis_Z2491_chromosome_<>Neisseria_meningitidis_FAM18_chromosome_<>Neisseria_meningitidis_053442_chromosome_<>Neisseria_meningitidis_alpha14_chromosome_	-	-	0	-	-	-	-	-	-
Candidate_216_NC_011035	|	NGK_0588		hypothetical_protein	*	>>>	14	|	488931	489014	>>>	83	|	-33	<<<	NGK_0589	deoxycytidine_triphosphate_deaminase	*	candidate	218	0.0037	T	6	Neisseria_gonorrhoeae_FA_1090_chromosome_<>Neisseria_meningitidis_MC58_chromosome_<>Neisseria_meningitidis_Z2491_chromosome_<>Neisseria_meningitidis_FAM18_chromosome_<>Neisseria_meningitidis_053442_chromosome_<>Neisseria_meningitidis_alpha14_chromosome_	-	-	1		Candidate_771_NC_011035(para)	-	-	-	-
Candidate_217_NC_011035	|	NGK_0599		hypothetical_protein	*	<<<	177	|	496336	496396	<<<	60	|	1308	<<<	NGK_0600	hypothetical_protein	*	candidate	310	8.1e-07	T	1	Neisseria_meningitidis_Z2491_chromosome_	RNA	-	1		Candidate_218_NC_011035(tandem),Candidate_749_NC_011035(tandem)	-	-	-	-
Candidate_218_NC_011035	|	NGK_0599		hypothetical_protein	*	<<<	873	|	497032	497094	<<<	62	|	610	<<<	NGK_0600	hypothetical_protein	*	candidate	1196	6.5e-48	T	4	Neisseria_gonorrhoeae_FA_1090_chromosome_<>Neisseria_meningitidis_MC58_chromosome_<>Neisseria_meningitidis_Z2491_chromosome_<>Neisseria_meningitidis_FAM18_chromosome_	-	-	1		Candidate_217_NC_011035(tandem),Candidate_749_NC_011035(tandem)	-	-	-	-
Candidate_219_NC_011035	|	NGK_0602		Pseudouridine_synthase	*	>>>	1	|	499576	499655	>>>	79	|	-3	<<<	NGK_0603	hypothetical_protein	*	candidate	312	1.7e-07	T	6	Neisseria_gonorrhoeae_FA_1090_chromosome_<>Neisseria_meningitidis_MC58_chromosome_<>Neisseria_meningitidis_Z2491_chromosome_<>Neisseria_meningitidis_FAM18_chromosome_<>Neisseria_meningitidis_053442_chromosome_<>Neisseria_meningitidis_alpha14_chromosome_	-	-	1		Candidate_771_NC_011035(para)	-	-	-	-
Candidate_220_NC_011035	|	NGK_0607		pantoate--beta-alanine_ligase	*	>>>	2	|	503276	503363	>>>	87	|	230	>>>	NGK_0608	putative_periplasmic_protein	*	candidate	206	0.003	T	6	Neisseria_gonorrhoeae_FA_1090_chromosome_<>Neisseria_meningitidis_MC58_chromosome_<>Neisseria_meningitidis_Z2491_chromosome_<>Neisseria_meningitidis_FAM18_chromosome_<>Neisseria_meningitidis_053442_chromosome_<>Neisseria_meningitidis_alpha14_chromosome_	RNA	-	8		Candidate_420_NC_011035(para),Candidate_155_NC_011035(para),Candidate_156_NC_011035(para),Candidate_306_NC_011035(para),Candidate_307_NC_011035(para),Candidate_526_NC_011035(para),Candidate_446_NC_011035(para),Candidate_447_NC_011035(para)	-	-	-	-
Candidate_221_NC_011035	|	NGK_0612		50S_ribosomal_protein_L25/general_stress_protein_C	*	>>>	2	|	508978	509069	>>>	91	|	31	<<<	NGK_0613	Penicillin-binding_protein	*	candidate	566	3.6e-19	B	6	Neisseria_gonorrhoeae_FA_1090_chromosome_<>Neisseria_meningitidis_MC58_chromosome_<>Neisseria_meningitidis_Z2491_chromosome_<>Neisseria_meningitidis_FAM18_chromosome_<>Neisseria_meningitidis_053442_chromosome_<>Neisseria_meningitidis_alpha14_chromosome_	RNA	-	8		Candidate_197_NC_011035(para),Candidate_183_NC_011035(para),Candidate_731_NC_011035(para),Candidate_413_NC_011035(para),Candidate_523_NC_011035(para),Candidate_691_NC_011035(para),Candidate_366_NC_011035(para),Candidate_572_NC_011035(para)	-	-	-	-
Candidate_222_NC_011035	|	NGK_0612		50S_ribosomal_protein_L25/general_stress_protein_C	*	>>>	2	|	508978	509091	>>>	113	|	9	<<<	NGK_0613	Penicillin-binding_protein	*	candidate	566	3.6e-19	T	6	Neisseria_gonorrhoeae_FA_1090_chromosome_<>Neisseria_meningitidis_MC58_chromosome_<>Neisseria_meningitidis_Z2491_chromosome_<>Neisseria_meningitidis_FAM18_chromosome_<>Neisseria_meningitidis_053442_chromosome_<>Neisseria_meningitidis_alpha14_chromosome_	RNA	-	8		Candidate_197_NC_011035(para),Candidate_183_NC_011035(para),Candidate_731_NC_011035(para),Candidate_413_NC_011035(para),Candidate_523_NC_011035(para),Candidate_691_NC_011035(para),Candidate_366_NC_011035(para),Candidate_572_NC_011035(para)	-	-	-	-
Candidate_223_NC_011035	|	NGK_0614		threonine_dehydratase	*	>>>	1	|	511947	512033	>>>	86	|	-33	<<<	NGK_0615	putative_ABC_transporter,_ATP-binding_protein	*	candidate	229	0.0013	T	6	Neisseria_gonorrhoeae_FA_1090_chromosome_<>Neisseria_meningitidis_MC58_chromosome_<>Neisseria_meningitidis_Z2491_chromosome_<>Neisseria_meningitidis_FAM18_chromosome_<>Neisseria_meningitidis_053442_chromosome_<>Neisseria_meningitidis_alpha14_chromosome_	-	-	1		Candidate_771_NC_011035(para)	-	-	-	-
Candidate_224_NC_011035	|	NGK_0618		hypothetical_protein	*	>>>	62	|	515638	515822	>>>	184	|	88	>>>	NGK_0619	Integral_membrane_protein	*	candidate	228	0.00083	T	7	Neisseria_gonorrhoeae_FA_1090_chromosome_<>Neisseria_meningitidis_MC58_chromosome_<>Neisseria_meningitidis_Z2491_chromosome_<>Neisseria_meningitidis_FAM18_chromosome_<>Neisseria_meningitidis_053442_chromosome_<>Chlorobium_limicola_DSM_245_chromosome_<>Neisseria_meningitidis_alpha14_chromosome_	RNA	-	0	-	-	-	-	-	-E.coli_sig70_2(10.21|-112)E.coli_sig70_2(8.50|-40)E.coli_sig70_3(7.25|-115)
Candidate_225_NC_011035	|	NGK_0619		Integral_membrane_protein	*	>>>	1	|	516416	516648	>>>	232	|	-3	<<<	NGK_0620	Fe-superoxide_dismutase_SodB	*	candidate	1098	4.3e-44	T	1	Neisseria_gonorrhoeae_FA_1090_chromosome_	RNA	-	1		Candidate_771_NC_011035(para)	-	-	-	-
Candidate_226_NC_011035	|	NGK_0627		Putative_type_IV_pilin-like_protein	*	>>>	1	|	522383	522460	>>>	77	|	-10	<<<	NGK_0628	hypothetical_protein	*	candidate	253	6.8e-05	T	6	Neisseria_gonorrhoeae_FA_1090_chromosome_<>Neisseria_meningitidis_MC58_chromosome_<>Neisseria_meningitidis_Z2491_chromosome_<>Neisseria_meningitidis_FAM18_chromosome_<>Neisseria_meningitidis_053442_chromosome_<>Neisseria_meningitidis_alpha14_chromosome_	-	-	1		Candidate_771_NC_011035(para)	-	-	-	-
Candidate_227_NC_011035	|	NGK_0631		deoxyuridine_5_-triphosphate_nucleotidohydrolase	*	>>>	3	|	524089	524156	>>>	67	|	0	>>>	NGK_0632	succinyldiaminopimelate_transaminase	*	candidate	267	1.9e-05	T	5	Neisseria_gonorrhoeae_FA_1090_chromosome_<>Neisseria_meningitidis_MC58_chromosome_<>Neisseria_meningitidis_Z2491_chromosome_<>Neisseria_meningitidis_FAM18_chromosome_<>Neisseria_meningitidis_alpha14_chromosome_	RNA	-	0	-	-	-	5	-	-
Candidate_228_NC_011035	|	NGK_0632		succinyldiaminopimelate_transaminase	*	>>>	2	|	525347	525409	>>>	62	|	90	>>>	NGK_0633	hypothetical_protein	*	candidate	200	0.0049	T	4	Neisseria_gonorrhoeae_FA_1090_chromosome_<>Neisseria_meningitidis_MC58_chromosome_<>Neisseria_meningitidis_053442_chromosome_<>Neisseria_meningitidis_alpha14_chromosome_	RNA	-	2		Candidate_754_NC_011035(anti),Candidate_477_NC_011035(para),Candidate_660_NC_011035(para)	-	-	RS	-
Candidate_229_NC_011035	|	NGK_trnaSer2		tRNA-Ser	*	>>>	1	|	526454	526581	>>>	127	|	-53	>>>	NGK_trnaSer3	tRNA-Ser	*	candidate	228	0.0011	T	3	Neisseria_meningitidis_MC58_chromosome_<>Neisseria_meningitidis_FAM18_chromosome_<>Neisseria_meningitidis_053442_chromosome_	-	-	1		Candidate_771_NC_011035(para)	-	5	-	-E.coli_sig70_2(7.96|-238)
Candidate_230_NC_011035	|	NGK_0635		Putative_Phage_integrase	*	>>>	60	|	528070	528364	<<<	294	|	0	<<<	NGK_0637	putative_phage_associated_protein	*	candidate	1766	8e-74	B	1	Neisseria_gonorrhoeae_FA_1090_chromosome_	RNA	-	0		Candidate_231_NC_011035(anti)	-	-	-	-
Candidate_232_NC_011035	|	NGK_0669		putative_phage_associated_protein	*	>>>	50	|	547933	547979	>>>	46	|	139	>>>	NGK_0670	putative_phage_associated_protein	*	candidate	852	2.6e-32	B	3	Neisseria_gonorrhoeae_FA_1090_chromosome_<>Neisseria_meningitidis_MC58_chromosome_<>Neisseria_meningitidis_FAM18_chromosome_	-	-	3		Candidate_102_NC_011035(anti),Candidate_760_NC_011035(tandem),Candidate_342_NC_011035(para),Candidate_576_NC_011035(para),Candidate_578_NC_011035(para)	-	-	-	-
Candidate_234_NC_011035	|	NGK_0682		hypothetical_protein	*	<<<	8	|	562282	562380	<<<	98	|	0	<<<	NGK_0683	hypothetical_protein	*	candidate	349	1.4e-09	T	2	Neisseria_gonorrhoeae_FA_1090_chromosome_<>Neisseria_meningitidis_alpha14_chromosome_	RNA	-	0	-	-	-	5	-	-
Candidate_235_NC_011035	|	NGK_0687		Lst	*	>>>	1	|	566839	566992	>>>	153	|	-13	<<<	NGK_0688	putative_C-type_cytochrome	*	candidate	647	6e-23	T	6	Neisseria_gonorrhoeae_FA_1090_chromosome_<>Neisseria_meningitidis_MC58_chromosome_<>Neisseria_meningitidis_Z2491_chromosome_<>Neisseria_meningitidis_FAM18_chromosome_<>Neisseria_meningitidis_053442_chromosome_<>Neisseria_meningitidis_alpha14_chromosome_	-	-	1		Candidate_771_NC_011035(para)	-	-	-	-
Candidate_236_NC_011035	|	NGK_0703		MafB5	*	<<<	73	|	575767	575832	<<<	65	|	279	<<<	NGK_0704	hypothetical_protein	*	candidate	246	0.00025	T	4	Neisseria_gonorrhoeae_FA_1090_chromosome_<>Neisseria_meningitidis_MC58_chromosome_<>Neisseria_meningitidis_Z2491_chromosome_<>Neisseria_meningitidis_FAM18_chromosome_	RNA	-	0	-	-	-	-	-	-
Candidate_237_NC_011035	|	NGK_0707		hypothetical_protein	*	<<<	50	|	578974	579059	<<<	85	|	413	<<<	NGK_0708	MafB5	*	candidate	666	5.7e-24	T	10	Staphylococcus_aureus_subsp._aureus_COL_chromosome_<>Staphylococcus_aureus_subsp._aureus_USA300_FPR3757_chromosome_<>Staphylococcus_aureus_subsp._aureus_NCTC_8325_chromosome_<>Trichodesmium_erythraeum_IMS101_chromosome_<>Shewanella_putrefaciens_CN-32_chromosome_<>Staphylococcus_aureus_subsp._aureus_str._Newman_chromosome_<>Rickettsia_massiliae_MTU5_chromosome_<>Staphylococcus_aureus_subsp._aureus…	-	-	0	-	-	-	-	-	-
Candidate_238_NC_011035	|	NGK_0734		glutamate_dehydrogenase,_NAD-specific	*	>>>	1	|	600533	600605	>>>	72	|	-15	<<<	NGK_0735	hypothetical_protein	*	candidate	295	7.5e-07	T	1	Neisseria_gonorrhoeae_FA_1090_chromosome_	-	-	1		Candidate_771_NC_011035(para)	-	-	-	-
Candidate_239_NC_011035	|	NGK_0738		aminotransferase_AlaT	*	>>>	7	|	603109	603193	>>>	84	|	-21	<<<	NGK_0739	putative_ClpB_protein	*	candidate	307	2.6e-07	T	6	Neisseria_gonorrhoeae_FA_1090_chromosome_<>Neisseria_meningitidis_MC58_chromosome_<>Neisseria_meningitidis_Z2491_chromosome_<>Neisseria_meningitidis_FAM18_chromosome_<>Neisseria_meningitidis_053442_chromosome_<>Neisseria_meningitidis_alpha14_chromosome_	-	-	1		Candidate_771_NC_011035(para)	-	-	-	-
Candidate_240_NC_011035	|	NGK_0744		Ag473	*	>>>	49	|	608359	608412	>>>	53	|	106	<<<	NGK_0745	putative_exopolyphosphatase	*	candidate	805	4.5e-30	B	6	Neisseria_gonorrhoeae_FA_1090_chromosome_<>Neisseria_meningitidis_MC58_chromosome_<>Neisseria_meningitidis_Z2491_chromosome_<>Neisseria_meningitidis_FAM18_chromosome_<>Neisseria_meningitidis_053442_chromosome_<>Neisseria_meningitidis_alpha14_chromosome_	RNA	-	0		Candidate_241_NC_011035(anti)	-	-	-	-
Candidate_241_NC_011035	|	NGK_0744		Ag473	*	>>>	48	|	608358	608518	<<<	160	|	0	<<<	NGK_0745	putative_exopolyphosphatase	*	candidate	868	4.9e-33	B	6	Neisseria_gonorrhoeae_FA_1090_chromosome_<>Neisseria_meningitidis_MC58_chromosome_<>Neisseria_meningitidis_Z2491_chromosome_<>Neisseria_meningitidis_FAM18_chromosome_<>Neisseria_meningitidis_053442_chromosome_<>Neisseria_meningitidis_alpha14_chromosome_	RNA	-	5		Candidate_240_NC_011035(anti),Candidate_770_NC_011035(anti),Candidate_413_NC_011035(para),Candidate_154_NC_011035(para),Candidate_667_NC_011035(para),Candidate_477_NC_011035(para),Candidate_660_NC_011035(para)	-	-	-	-
Candidate_242_NC_011035	|	NGK_0744		Ag473	*	>>>	49	|	608359	608534	>>>	175	|	-16	<<<	NGK_0745	putative_exopolyphosphatase	*	candidate	805	4.5e-30	T	6	Neisseria_gonorrhoeae_FA_1090_chromosome_<>Neisseria_meningitidis_MC58_chromosome_<>Neisseria_meningitidis_Z2491_chromosome_<>Neisseria_meningitidis_FAM18_chromosome_<>Neisseria_meningitidis_053442_chromosome_<>Neisseria_meningitidis_alpha14_chromosome_	RNA	-	1		Candidate_771_NC_011035(para)	-	-	-	-
Candidate_243_NC_011035	|	NGK_0749		outer_membrane_protein	*	>>>	1	|	612131	612196	>>>	65	|	294	>>>	NGK_0750	hypothetical_protein	*	candidate	111	0.0049	T	6	Neisseria_gonorrhoeae_FA_1090_chromosome_<>Neisseria_meningitidis_MC58_chromosome_<>Neisseria_meningitidis_Z2491_chromosome_<>Neisseria_meningitidis_FAM18_chromosome_<>Neisseria_meningitidis_053442_chromosome_<>Neisseria_meningitidis_alpha14_chromosome_	RNA	-	3		Candidate_469_NC_011035(para),Candidate_403_NC_011035(para),Candidate_393_NC_011035(para)	-	-	-	-
Candidate_244_NC_011035	|	NGK_0757		hypothetical_protein	*	>>>	1	|	617729	617806	>>>	77	|	-15	<<<	NGK_0758	fumarate_hydratase	*	candidate	293	1.5e-06	T	6	Neisseria_gonorrhoeae_FA_1090_chromosome_<>Neisseria_meningitidis_MC58_chromosome_<>Neisseria_meningitidis_Z2491_chromosome_<>Neisseria_meningitidis_FAM18_chromosome_<>Neisseria_meningitidis_053442_chromosome_<>Neisseria_meningitidis_alpha14_chromosome_	-	-	1		Candidate_771_NC_011035(para)	-	-	-	-
Candidate_245_NC_011035	|	NGK_0782		putative_phage_associated_protein	*	>>>	1	|	634863	635093	>>>	230	|	35	>>>	NGK_0783	putative_phage_associated_protein	*	candidate	104	0.0049	T	6	Neisseria_gonorrhoeae_FA_1090_chromosome_<>Neisseria_meningitidis_MC58_chromosome_<>Neisseria_meningitidis_Z2491_chromosome_<>Neisseria_meningitidis_FAM18_chromosome_<>Neisseria_meningitidis_053442_chromosome_<>Neisseria_meningitidis_alpha14_chromosome_	RNA	-	52		Candidate_785_NC_011035(para),Candidate_781_NC_011035(para),Candidate_676_NC_011035(para),Candidate_702_NC_011035(para),Candidate_640_NC_011035(para),Candidate_693_NC_011035(para),Candidate_622_NC_011035(para),Candidate_623_NC_011035(para),Candidate_749_NC_011035(para),Candidate_478_NC_011035(para),Candidate_672_NC_011035(para),Candidate_551_NC_011035(para),Candidate_552_NC_011035(para),Candidate…	-	5	RS	-
Candidate_246_NC_011035	|	NGK_0795		H.8_outer_membrane_protein	*	>>>	1	|	649319	649389	>>>	70	|	22	>>>	NGK_0796	hypothetical_protein	*	candidate	443	1.7e-13	B	6	Neisseria_gonorrhoeae_FA_1090_chromosome_<>Neisseria_meningitidis_MC58_chromosome_<>Neisseria_meningitidis_Z2491_chromosome_<>Neisseria_meningitidis_FAM18_chromosome_<>Neisseria_meningitidis_053442_chromosome_<>Neisseria_meningitidis_alpha14_chromosome_	RNA	-	0		Candidate_775_NC_011035(anti)	-	5	-	-
Candidate_247_NC_011035	|	NGK_0798		succinyl-diaminopimelate_desuccinylase	*	>>>	14	|	651848	652224	>>>	376	|	28	>>>	NGK_0799	putative_AraC-family_transcriptional_regulator	*	candidate	172	6.6e-06	T	6	Neisseria_gonorrhoeae_FA_1090_chromosome_<>Neisseria_meningitidis_MC58_chromosome_<>Neisseria_meningitidis_Z2491_chromosome_<>Neisseria_meningitidis_FAM18_chromosome_<>Neisseria_meningitidis_053442_chromosome_<>Neisseria_meningitidis_alpha14_chromosome_	RNA	-	5		Candidate_347_NC_011035(para),Candidate_489_NC_011035(para),Candidate_323_NC_011035(para),Candidate_251_NC_011035(para),Candidate_387_NC_011035(para)	-	5	RS	-E.coli_sig70_3(9.87|-103)
Candidate_248_NC_011035	|	NGK_0799		putative_AraC-family_transcriptional_regulator	*	>>>	75	|	653144	653301	>>>	157	|	116	<<<	NGK_0800	Hypothetical_outer_membrane_protein	*	candidate	214	0.0038	T	2	Neisseria_gonorrhoeae_FA_1090_chromosome_<>Burkholderia_mallei_ATCC_23344_chromosome_1	RNA	-	0	-	-	-	-	-	-
Candidate_249_NC_011035	|	NGK_0807		putative_virulence_associated_protein	*	>>>	19	|	659034	659087	>>>	53	|	255	<<<	NGK_0808	Oxidoreductase,_putative	*	candidate	394	9.1e-12	B	8	Haemophilus_influenzae_Rd_KW20_chromosome_<>Neisseria_gonorrhoeae_FA_1090_chromosome_<>Neisseria_meningitidis_MC58_chromosome_<>Neisseria_meningitidis_Z2491_chromosome_<>Haemophilus_influenzae_86-028NP_chromosome_<>Neisseria_meningitidis_FAM18_chromosome_<>Haemophilus_influenzae_PittGG_chromosome_<>Neisseria_meningitidis_alpha14_chromosome_	RNA	-	0	W	Candidate_776_NC_011035(anti)	-	-	-	-E.coli_sig70_1(7.68|-49)E.coli_sig70_2(8.06|-49)
Candidate_250_NC_011035	|	NGK_0813		putative_transferase	*	>>>	2	|	662988	663077	>>>	89	|	-20	<<<	NGK_0814	hypothetical_protein	*	candidate	331	2.6e-08	T	6	Neisseria_gonorrhoeae_FA_1090_chromosome_<>Neisseria_meningitidis_MC58_chromosome_<>Neisseria_meningitidis_Z2491_chromosome_<>Neisseria_meningitidis_FAM18_chromosome_<>Neisseria_meningitidis_053442_chromosome_<>Neisseria_meningitidis_alpha14_chromosome_	RNA	-	1		Candidate_771_NC_011035(para)	-	-	-	-
Candidate_251_NC_011035	|	NGK_0831		hypothetical_protein	*	<<<	54	|	675773	675881	<<<	108	|	353	<<<	NGK_0832	arginyl-tRNA_synthetase	*	candidate	310	3.4e-08	T	6	Neisseria_gonorrhoeae_FA_1090_chromosome_<>Neisseria_meningitidis_MC58_chromosome_<>Neisseria_meningitidis_Z2491_chromosome_<>Neisseria_meningitidis_FAM18_chromosome_<>Neisseria_meningitidis_053442_chromosome_<>Neisseria_meningitidis_alpha14_chromosome_	-	-	7		Candidate_778_NC_011035(opp),Candidate_347_NC_011035(para),Candidate_488_NC_011035(para),Candidate_489_NC_011035(para),Candidate_323_NC_011035(para),Candidate_362_NC_011035(para),Candidate_247_NC_011035(para)	-	-	-	-
Candidate_252_NC_011035	|	NGK_0837		hypothetical_protein	*	>>>	1	|	681852	681932	>>>	80	|	-1	>>>	NGK_0838	putative_ribonuclease_PH	*	candidate	396	2.6e-11	T	6	Neisseria_gonorrhoeae_FA_1090_chromosome_<>Neisseria_meningitidis_MC58_chromosome_<>Neisseria_meningitidis_Z2491_chromosome_<>Neisseria_meningitidis_FAM18_chromosome_<>Neisseria_meningitidis_053442_chromosome_<>Neisseria_meningitidis_alpha14_chromosome_	-	-	1		Candidate_771_NC_011035(para)	-	5	-	-
Candidate_253_NC_011035	|	NGK_0849		proline_iminopeptidase_Pip	*	>>>	1	|	690409	690474	>>>	65	|	-11	<<<	NGK_0850	hypothetical_protein	*	candidate	262	4.3e-05	B	6	Neisseria_gonorrhoeae_FA_1090_chromosome_<>Neisseria_meningitidis_MC58_chromosome_<>Neisseria_meningitidis_Z2491_chromosome_<>Neisseria_meningitidis_FAM18_chromosome_<>Neisseria_meningitidis_053442_chromosome_<>Neisseria_meningitidis_alpha14_chromosome_	-	-	1		Candidate_771_NC_011035(para)	-	-	-	-
Candidate_254_NC_011035	|	NGK_0853		putative_transmembrane_transport_protein	*	>>>	1	|	694300	694386	>>>	86	|	-27	<<<	NGK_0854	RNA_methylase	*	candidate	296	1.2e-06	T	6	Neisseria_gonorrhoeae_FA_1090_chromosome_<>Neisseria_meningitidis_MC58_chromosome_<>Neisseria_meningitidis_Z2491_chromosome_<>Neisseria_meningitidis_FAM18_chromosome_<>Neisseria_meningitidis_053442_chromosome_<>Neisseria_meningitidis_alpha14_chromosome_	-	-	1		Candidate_771_NC_011035(para)	-	-	-	-
Candidate_255_NC_011035	|	NGK_0861		elongation_factor_P	*	>>>	1	|	699739	699812	>>>	73	|	-27	<<<	NGK_0862	putative_lipoprotein	*	candidate	240	0.0005	T	2	Neisseria_gonorrhoeae_FA_1090_chromosome_<>Neisseria_meningitidis_053442_chromosome_	-	-	1		Candidate_771_NC_011035(para)	-	-	-	-
Candidate_256_NC_011035	|	NGK_0867		NADH_dehydrogenase_I_chain_N	*	>>>	-16	|	702895	702995	<<<	100	|	0	<<<	NGK_0868	50S_ribosomal_protein_L36	*	candidate	386	5.7e-11	T	6	Neisseria_gonorrhoeae_FA_1090_chromosome_<>Neisseria_meningitidis_MC58_chromosome_<>Neisseria_meningitidis_Z2491_chromosome_<>Neisseria_meningitidis_FAM18_chromosome_<>Neisseria_meningitidis_053442_chromosome_<>Neisseria_meningitidis_alpha14_chromosome_	-	-	1		Candidate_771_NC_011035(para)	-	-	-	-
Candidate_257_NC_011035	|	NGK_0873		Peroxiredoxin_2_family_protein/glutaredoxin	*	>>>	9	|	707909	708041	>>>	132	|	40	>>>	NGK_0874	dihydrolipoamide_dehydrogenase	*	candidate	327	9.2e-09	T	6	Neisseria_gonorrhoeae_FA_1090_chromosome_<>Neisseria_meningitidis_MC58_chromosome_<>Neisseria_meningitidis_Z2491_chromosome_<>Neisseria_meningitidis_FAM18_chromosome_<>Neisseria_meningitidis_053442_chromosome_<>Neisseria_meningitidis_alpha14_chromosome_	RNA	-	0	-	-	-	5	-	-
Candidate_258_NC_011035	|	NGK_0895		trafficking_protein_B	*	>>>	43	|	726483	726550	>>>	67	|	37	<<<	NGK_0896	Iron-sulphur_protein	*	candidate	228	0.00045	T	6	Neisseria_gonorrhoeae_FA_1090_chromosome_<>Neisseria_meningitidis_MC58_chromosome_<>Neisseria_meningitidis_Z2491_chromosome_<>Neisseria_meningitidis_FAM18_chromosome_<>Neisseria_meningitidis_053442_chromosome_<>Neisseria_meningitidis_alpha14_chromosome_	RNA	-	4		Candidate_260_NC_011035(tandem),Candidate_115_NC_011035(para),Candidate_155_NC_011035(para),Candidate_156_NC_011035(para)	-	-	-	-
Candidate_259_NC_011035	|	NGK_0895		trafficking_protein_B	*	>>>	-4	|	726436	726587	<<<	151	|	0	<<<	NGK_0896	Iron-sulphur_protein	*	candidate	228	0.00045	T	6	Neisseria_gonorrhoeae_FA_1090_chromosome_<>Neisseria_meningitidis_MC58_chromosome_<>Neisseria_meningitidis_Z2491_chromosome_<>Neisseria_meningitidis_FAM18_chromosome_<>Neisseria_meningitidis_053442_chromosome_<>Neisseria_meningitidis_alpha14_chromosome_	-	-	1		Candidate_771_NC_011035(para)	-	-	-	-
Candidate_260_NC_011035	|	NGK_0895		trafficking_protein_B	*	>>>	1	|	726441	726526	>>>	85	|	61	<<<	NGK_0896	Iron-sulphur_protein	*	candidate	740	4.2e-27	T	1	Neisseria_gonorrhoeae_FA_1090_chromosome_	RNA	-	1		Candidate_258_NC_011035(tandem)	-	-	-	-Multi_s54(10.85|-203)
Candidate_261_NC_011035	|	NGK_0895		trafficking_protein_B	*	>>>	43	|	726483	726606	>>>	123	|	-19	<<<	NGK_0896	Iron-sulphur_protein	*	candidate	228	0.00045	T	6	Neisseria_gonorrhoeae_FA_1090_chromosome_<>Neisseria_meningitidis_MC58_chromosome_<>Neisseria_meningitidis_Z2491_chromosome_<>Neisseria_meningitidis_FAM18_chromosome_<>Neisseria_meningitidis_053442_chromosome_<>Neisseria_meningitidis_alpha14_chromosome_	RNA	-	1		Candidate_771_NC_011035(para)	-	-	-	-
Candidate_262_NC_011035	|	NGK_0902		putative_lipoprotein	*	>>>	4	|	733438	733569	>>>	131	|	-59	<<<	NGK_0903	3-phosphoshikimate_1-carboxyvinyltransferase	*	candidate	207	0.002	T	6	Neisseria_gonorrhoeae_FA_1090_chromosome_<>Neisseria_meningitidis_MC58_chromosome_<>Neisseria_meningitidis_Z2491_chromosome_<>Neisseria_meningitidis_FAM18_chromosome_<>Neisseria_meningitidis_053442_chromosome_<>Neisseria_meningitidis_alpha14_chromosome_	-	-	1		Candidate_771_NC_011035(para)	-	-	-	-
Candidate_263_NC_011035	|	NGK_0902		putative_lipoprotein	*	>>>	4	|	733438	733542	>>>	104	|	-32	<<<	NGK_0903	3-phosphoshikimate_1-carboxyvinyltransferase	*	candidate	207	0.002	T	6	Neisseria_gonorrhoeae_FA_1090_chromosome_<>Neisseria_meningitidis_MC58_chromosome_<>Neisseria_meningitidis_Z2491_chromosome_<>Neisseria_meningitidis_FAM18_chromosome_<>Neisseria_meningitidis_053442_chromosome_<>Neisseria_meningitidis_alpha14_chromosome_	-	-	1		Candidate_771_NC_011035(para)	-	-	-	-
Candidate_264_NC_011035	|	NGK_0905		transcription_elongation_factor_GreA	*	>>>	35	|	735715	735769	>>>	54	|	201	>>>	NGK_0906	porin	*	candidate	210	0.0028	T	7	Neisseria_gonorrhoeae_FA_1090_chromosome_<>Neisseria_meningitidis_MC58_chromosome_<>Neisseria_meningitidis_Z2491_chromosome_<>Neisseria_meningitidis_FAM18_chromosome_<>Caldicellulosiruptor_saccharolyticus_DSM_8903_chromosome_<>Neisseria_meningitidis_053442_chromosome_<>Neisseria_meningitidis_alpha14_chromosome_	-	-	0	-	-	-	-	-	-
Candidate_265_NC_011035	|	NGK_0909		hypothetical_protein	*	>>>	1	|	737540	737657	>>>	117	|	53	>>>	NGK_0910	hypothetical_protein	*	candidate	310	1.1e-28	T	3	Neisseria_gonorrhoeae_FA_1090_chromosome_<>Neisseria_meningitidis_Z2491_chromosome_<>Neisseria_meningitidis_alpha14_chromosome_	RNA	-	0	-	-	-	5	-	-
Candidate_266_NC_011035	|	NGK_0909		hypothetical_protein	*	>>>	1	|	737540	737636	>>>	96	|	74	>>>	NGK_0910	hypothetical_protein	*	candidate	310	1.1e-28	T	3	Neisseria_gonorrhoeae_FA_1090_chromosome_<>Neisseria_meningitidis_Z2491_chromosome_<>Neisseria_meningitidis_alpha14_chromosome_	RNA	-	0	-	-	-	5	-	-
Candidate_267_NC_011035	|	NGK_0910		hypothetical_protein	*	>>>	1	|	737895	737962	>>>	67	|	-9	<<<	NGK_0911	tRNA-dihydrouridine_synthase_C	*	candidate	267	2.4e-05	T	5	Neisseria_gonorrhoeae_FA_1090_chromosome_<>Neisseria_meningitidis_MC58_chromosome_<>Neisseria_meningitidis_FAM18_chromosome_<>Neisseria_meningitidis_053442_chromosome_<>Neisseria_meningitidis_alpha14_chromosome_	-	-	1		Candidate_771_NC_011035(para)	-	-	-	-
Candidate_268_NC_011035	|	NGK_0914		hypothetical_protein	*	>>>	1	|	743866	743971	>>>	105	|	-11	>>>	NGK_0915	D-lactate_dehydrogenase	*	candidate	480	3.6e-15	T	1	Neisseria_gonorrhoeae_FA_1090_chromosome_	-	-	1		Candidate_771_NC_011035(para)	-	5	-	-
Candidate_269_NC_011035	|	NGK_0915		D-lactate_dehydrogenase	*	>>>	1	|	745654	745774	>>>	120	|	62	>>>	NGK_0916	hypothetical_protein	*	candidate	95	0.00081	T	6	Neisseria_gonorrhoeae_FA_1090_chromosome_<>Neisseria_meningitidis_MC58_chromosome_<>Neisseria_meningitidis_Z2491_chromosome_<>Neisseria_meningitidis_FAM18_chromosome_<>Neisseria_meningitidis_053442_chromosome_<>Neisseria_meningitidis_alpha14_chromosome_	RNA	-	2		Candidate_63_NC_011035(para),Candidate_420_NC_011035(para)	-	5	RS	-
Candidate_270_NC_011035	|	NGK_0915		D-lactate_dehydrogenase	*	>>>	1	|	745654	745750	>>>	96	|	86	>>>	NGK_0916	hypothetical_protein	*	candidate	95	0.00081	T	6	Neisseria_gonorrhoeae_FA_1090_chromosome_<>Neisseria_meningitidis_MC58_chromosome_<>Neisseria_meningitidis_Z2491_chromosome_<>Neisseria_meningitidis_FAM18_chromosome_<>Neisseria_meningitidis_053442_chromosome_<>Neisseria_meningitidis_alpha14_chromosome_	RNA	-	2		Candidate_63_NC_011035(para),Candidate_420_NC_011035(para)	-	-	RS	-
Candidate_271_NC_011035	|	NGK_0916		hypothetical_protein	*	>>>	4	|	746213	746281	>>>	68	|	66	>>>	NGK_0917	Macrophage_infectivity_potentiator-related_protein	*	candidate	193	3.4e-16	T	2	Neisseria_gonorrhoeae_FA_1090_chromosome_<>Neisseria_meningitidis_Z2491_chromosome_	RNA	-	2		Candidate_399_NC_011035(para),Candidate_572_NC_011035(para)	-	5	RS	-
Candidate_272_NC_011035	|	NGK_0923		putative_IS150_ORF_B	*	>>>	249	|	750585	750717	<<<	132	|	360	<<<	NGK_0924	hypothetical_protein	*	candidate	224	1.2e-05	T	145	Haemophilus_influenzae_Rd_KW20_chromosome_<>Campylobacter_jejuni_subsp._jejuni_NCTC_11168_chromosome_<>Vibrio_cholerae_O1_biovar_El_Tor_str._N16961_chromosome_I<>Bacillus_halodurans_C-125_chromosome_<>Pasteurella_multocida_subsp._multocida_str._Pm70_chromosome_<>Bordetella_bronchiseptica_RB50_chromosome_<>Bordetella_parapertussis_12822_chromosome_<>Bordetella_pertussis_Tohama_I_chromosome_<>Desul…	RNA	NC_003112_tmRNA(-)_-_(hom)|NC_002505_tmRNA(-)_-_(hom)	0		Candidate_23_NC_011035(anti),Candidate_273_NC_011035(anti)	-	-	-	-
Candidate_273_NC_011035	|	NGK_0923		putative_IS150_ORF_B	*	>>>	279	|	750615	750647	>>>	32	|	430	<<<	NGK_0924	hypothetical_protein	*	candidate	714	1.6e-26	T	94	Haemophilus_influenzae_Rd_KW20_chromosome_<>Campylobacter_jejuni_subsp._jejuni_NCTC_11168_chromosome_<>Bacillus_halodurans_C-125_chromosome_<>Pasteurella_multocida_subsp._multocida_str._Pm70_chromosome_<>Bordetella_parapertussis_12822_chromosome_<>Bordetella_pertussis_Tohama_I_chromosome_<>Desulfovibrio_vulgaris_str._Hildenborough_chromosome_<>Neisseria_gonorrhoeae_FA_1090_chromosome_<>Neisseria_…	RNA	NC_003112_tmRNA(-)_-_(hom|rev)|NC_002505_tmRNA(-)_-_(hom|rev)	1		Candidate_23_NC_011035(tandem),Candidate_272_NC_011035(anti)	-	-	-	-
Candidate_274_NC_011035	|	NGK_0938		hypothetical_protein	*	>>>	1	|	763803	763882	>>>	79	|	-9	<<<	NGK_0939	serine_hydroxymethyltransferase	*	candidate	360	1.3e-09	T	1	Neisseria_gonorrhoeae_FA_1090_chromosome_	-	-	1		Candidate_771_NC_011035(para)	-	-	-	-
Candidate_275_NC_011035	|	NGK_0943		hypothetical_protein	*	>>>	2	|	768220	768316	>>>	96	|	59	<<<	NGK_0944	fructose-1,6-bisphosphatase	*	candidate	437	1.9e-13	T	4	Neisseria_gonorrhoeae_FA_1090_chromosome_<>Neisseria_meningitidis_Z2491_chromosome_<>Neisseria_meningitidis_FAM18_chromosome_<>Neisseria_meningitidis_053442_chromosome_	RNA	-	10		Candidate_277_NC_011035(anti),Candidate_534_NC_011035(para),Candidate_700_NC_011035(para),Candidate_701_NC_011035(para),Candidate_142_NC_011035(para),Candidate_569_NC_011035(para),Candidate_477_NC_011035(para),Candidate_660_NC_011035(para),Candidate_366_NC_011035(para),Candidate_596_NC_011035(para),Candidate_621_NC_011035(para)	-	-	-	-
Candidate_276_NC_011035	|	NGK_0943		hypothetical_protein	*	>>>	2	|	768220	768298	>>>	78	|	77	<<<	NGK_0944	fructose-1,6-bisphosphatase	*	candidate	437	1.9e-13	T	4	Neisseria_gonorrhoeae_FA_1090_chromosome_<>Neisseria_meningitidis_Z2491_chromosome_<>Neisseria_meningitidis_FAM18_chromosome_<>Neisseria_meningitidis_053442_chromosome_	RNA	-	10		Candidate_277_NC_011035(anti),Candidate_534_NC_011035(para),Candidate_700_NC_011035(para),Candidate_701_NC_011035(para),Candidate_142_NC_011035(para),Candidate_569_NC_011035(para),Candidate_477_NC_011035(para),Candidate_660_NC_011035(para),Candidate_366_NC_011035(para),Candidate_596_NC_011035(para),Candidate_621_NC_011035(para)	-	-	-	-
Candidate_277_NC_011035	|	NGK_0943		hypothetical_protein	*	>>>	16	|	768234	768369	<<<	135	|	6	<<<	NGK_0944	fructose-1,6-bisphosphatase	*	candidate	437	1.9e-13	T	4	Neisseria_gonorrhoeae_FA_1090_chromosome_<>Neisseria_meningitidis_Z2491_chromosome_<>Neisseria_meningitidis_FAM18_chromosome_<>Neisseria_meningitidis_053442_chromosome_	RNA	-	10		Candidate_275_NC_011035(anti),Candidate_534_NC_011035(para),Candidate_700_NC_011035(para),Candidate_701_NC_011035(para),Candidate_142_NC_011035(para),Candidate_569_NC_011035(para),Candidate_477_NC_011035(para),Candidate_660_NC_011035(para),Candidate_366_NC_011035(para),Candidate_596_NC_011035(para),Candidate_621_NC_011035(para)	-	-	-	-
Candidate_278_NC_011035	|	NGK_0946		putative_secreted_protein	*	>>>	43	|	770267	770312	>>>	45	|	19	<<<	NGK_0947	hypothetical_protein	*	candidate	303	8.5e-08	T	5	Neisseria_meningitidis_MC58_chromosome_<>Neisseria_meningitidis_Z2491_chromosome_<>Neisseria_meningitidis_FAM18_chromosome_<>Neisseria_meningitidis_053442_chromosome_<>Neisseria_meningitidis_alpha14_chromosome_	RNA	-	4		Candidate_540_NC_011035(para),Candidate_541_NC_011035(para),Candidate_352_NC_011035(para),Candidate_353_NC_011035(para)	-	-	-	-
Candidate_279_NC_011035	|	NGK_0950		ADP-ribose_pyrophosphatase	*	>>>	1	|	772855	772921	>>>	66	|	111	>>>	NGK_0951	hypothetical_protein	*	candidate	664	3.3e-24	B	6	Neisseria_gonorrhoeae_FA_1090_chromosome_<>Neisseria_meningitidis_MC58_chromosome_<>Neisseria_meningitidis_Z2491_chromosome_<>Neisseria_meningitidis_FAM18_chromosome_<>Neisseria_meningitidis_053442_chromosome_<>Neisseria_meningitidis_alpha14_chromosome_	-	-	0	-	-	-	-	-	-
Candidate_281_NC_011035	|	NGK_0955		putative_cell-division_protein	*	>>>	12	|	777789	777912	<<<	123	|	39	<<<	NGK_0956	gamma-glutamyl_phosphate_reductase	*	candidate	234	0.00018	B	10	Neisseria_gonorrhoeae_FA_1090_chromosome_<>Neisseria_meningitidis_MC58_chromosome_<>Neisseria_meningitidis_Z2491_chromosome_<>Nitrosomonas_europaea_ATCC_19718_chromosome_<>Thiobacillus_denitrificans_ATCC_25259_chromosome_<>Ralstonia_metallidurans_CH34_chromosome_2<>Neisseria_meningitidis_FAM18_chromosome_<>Neisseria_meningitidis_053442_chromosome_<>Methylotenera_mobilis_JLW8_chromosome_<>Neisseri…	RNA	-	79		Candidate_282_NC_011035(anti),Candidate_412_NC_011035(para),Candidate_316_NC_011035(para),Candidate_94_NC_011035(para),Candidate_650_NC_011035(para),Candidate_153_NC_011035(para),Candidate_713_NC_011035(para),Candidate_362_NC_011035(para),Candidate_590_NC_011035(para),Candidate_789_NC_011035(para),Candidate_529_NC_011035(para),Candidate_699_NC_011035(para),Candidate_325_NC_011035(para),Candidate_…	-	-	-	-
Candidate_283_NC_011035	|	NGK_0961		hypothetical_protein	*	>>>	1	|	783234	783338	>>>	104	|	-22	<<<	NGK_0962	prolipoprotein_diacylglyceryl_transferase	*	candidate	372	3.2e-10	T	6	Neisseria_gonorrhoeae_FA_1090_chromosome_<>Neisseria_meningitidis_MC58_chromosome_<>Neisseria_meningitidis_Z2491_chromosome_<>Neisseria_meningitidis_FAM18_chromosome_<>Neisseria_meningitidis_053442_chromosome_<>Neisseria_meningitidis_alpha14_chromosome_	-	-	1		Candidate_771_NC_011035(para)	-	-	-	-
Candidate_284_NC_011035	|	NGK_0964		acetylglutamate_kinase	*	>>>	15	|	786454	786615	>>>	161	|	-60	<<<	NGK_0965	hypothetical_protein	*	candidate	236	8e-05	T	6	Neisseria_gonorrhoeae_FA_1090_chromosome_<>Neisseria_meningitidis_MC58_chromosome_<>Neisseria_meningitidis_Z2491_chromosome_<>Neisseria_meningitidis_FAM18_chromosome_<>Neisseria_meningitidis_053442_chromosome_<>Neisseria_meningitidis_alpha14_chromosome_	-	-	1		Candidate_771_NC_011035(para)	-	-	-	-
Candidate_285_NC_011035	|	NGK_0964		acetylglutamate_kinase	*	>>>	15	|	786454	786599	>>>	145	|	-44	<<<	NGK_0965	hypothetical_protein	*	candidate	236	8e-05	T	6	Neisseria_gonorrhoeae_FA_1090_chromosome_<>Neisseria_meningitidis_MC58_chromosome_<>Neisseria_meningitidis_Z2491_chromosome_<>Neisseria_meningitidis_FAM18_chromosome_<>Neisseria_meningitidis_053442_chromosome_<>Neisseria_meningitidis_alpha14_chromosome_	-	-	1		Candidate_771_NC_011035(para)	-	-	-	-
Candidate_286_NC_011035	|	NGK_0983		putative_ferredoxin	*	>>>	1	|	799597	799666	>>>	69	|	-12	<<<	NGK_0984	hypothetical_protein	*	candidate	259	1.2e-05	T	6	Neisseria_gonorrhoeae_FA_1090_chromosome_<>Neisseria_meningitidis_MC58_chromosome_<>Neisseria_meningitidis_Z2491_chromosome_<>Neisseria_meningitidis_FAM18_chromosome_<>Neisseria_meningitidis_053442_chromosome_<>Neisseria_meningitidis_alpha14_chromosome_	-	-	1		Candidate_771_NC_011035(para)	-	-	-	-
Candidate_287_NC_011035	|	NGK_0996		putative_biotin_synthase	*	>>>	28	|	808347	808426	>>>	79	|	-13	<<<	NGK_0997	hypothetical_protein	*	candidate	313	1.5e-07	T	6	Neisseria_gonorrhoeae_FA_1090_chromosome_<>Neisseria_meningitidis_MC58_chromosome_<>Neisseria_meningitidis_Z2491_chromosome_<>Neisseria_meningitidis_FAM18_chromosome_<>Neisseria_meningitidis_053442_chromosome_<>Neisseria_meningitidis_alpha14_chromosome_	-	-	1		Candidate_771_NC_011035(para)	-	-	-	-
Candidate_288_NC_011035	|	NGK_1005		hypothetical_protein	*	>>>	103	|	816591	816693	<<<	102	|	0	<<<	NGK_1006	Nickel-dependent_hydrogenase,_b-type_cytochrome_su	*	candidate	96	0.0047	T	6	Neisseria_gonorrhoeae_FA_1090_chromosome_<>Neisseria_meningitidis_MC58_chromosome_<>Neisseria_meningitidis_Z2491_chromosome_<>Neisseria_meningitidis_FAM18_chromosome_<>Neisseria_meningitidis_053442_chromosome_<>Neisseria_meningitidis_alpha14_chromosome_	-	-	14		Candidate_693_NC_011035(para),Candidate_464_NC_011035(para),Candidate_465_NC_011035(para),Candidate_615_NC_011035(para),Candidate_316_NC_011035(para),Candidate_373_NC_011035(para),Candidate_599_NC_011035(para),Candidate_446_NC_011035(para),Candidate_447_NC_011035(para),Candidate_30_NC_011035(para),Candidate_339_NC_011035(para),Candidate_340_NC_011035(para),Candidate_63_NC_011035(para),Candidate_1…	-	-	-	-
Candidate_289_NC_011035	|	NGK_1007		hypothetical_protein	*	>>>	5	|	818311	818394	>>>	83	|	27	>>>	NGK_1008	putative_GTP-binding_protein	*	candidate	524	1.3e-17	T	6	Neisseria_gonorrhoeae_FA_1090_chromosome_<>Neisseria_meningitidis_MC58_chromosome_<>Neisseria_meningitidis_Z2491_chromosome_<>Neisseria_meningitidis_FAM18_chromosome_<>Neisseria_meningitidis_053442_chromosome_<>Neisseria_meningitidis_alpha14_chromosome_	RNA	-	0	-	-	-	5	-	-
Candidate_290_NC_011035	|	NGK_1011		hypothetical_protein	*	>>>	1	|	823575	823664	>>>	89	|	-19	<<<	NGK_1012	inosine_5_-monophosphate_dehydrogenase	*	candidate	289	4.3e-07	T	6	Neisseria_gonorrhoeae_FA_1090_chromosome_<>Neisseria_meningitidis_MC58_chromosome_<>Neisseria_meningitidis_Z2491_chromosome_<>Neisseria_meningitidis_FAM18_chromosome_<>Neisseria_meningitidis_053442_chromosome_<>Neisseria_meningitidis_alpha14_chromosome_	RNA	-	1		Candidate_771_NC_011035(para)	-	-	-	-
Candidate_291_NC_011035	|	NGK_1018		hypothetical_protein	*	<<<	185	|	829821	829872	<<<	51	|	72	<<<	NGK_1019	lipoyl_synthase	*	candidate	1036	1.2e-50	T	9	Neisseria_gonorrhoeae_FA_1090_chromosome_<>Neisseria_meningitidis_MC58_chromosome_<>Neisseria_meningitidis_Z2491_chromosome_<>Neisseria_meningitidis_Z2491_chromosome_<>Neisseria_meningitidis_FAM18_chromosome_<>Neisseria_meningitidis_FAM18_chromosome_<>Neisseria_meningitidis_053442_chromosome_<>Neisseria_meningitidis_alpha14_chromosome_<>Neisseria_meningitidis_alpha14_chromosome_	RNA	-	1		Candidate_621_NC_011035(para)	-	-	-	-
Candidate_292_NC_011035	|	NGK_1023		Transporter,_putative	*	>>>	14	|	833091	833211	>>>	120	|	-29	<<<	NGK_1024	Membrane_protein_GNA1220	*	candidate	411	2.3e-12	T	6	Neisseria_gonorrhoeae_FA_1090_chromosome_<>Neisseria_meningitidis_MC58_chromosome_<>Neisseria_meningitidis_Z2491_chromosome_<>Neisseria_meningitidis_FAM18_chromosome_<>Neisseria_meningitidis_053442_chromosome_<>Neisseria_meningitidis_alpha14_chromosome_	RNA	-	1		Candidate_771_NC_011035(para)	-	-	-	-
Candidate_293_NC_011035	|	NGK_1098		Membrane_protein	*	>>>	1	|	898855	898947	>>>	92	|	81	<<<	NGK_1099	DbhA	*	candidate	875	2.8e-33	T	1	Neisseria_gonorrhoeae_FA_1090_chromosome_	RNA	-	2		Candidate_133_NC_011035(para),Candidate_134_NC_011035(para)	-	-	-	-
Candidate_294_NC_011035	|	NGK_1098		Membrane_protein	*	>>>	1	|	898855	899038	>>>	183	|	-10	<<<	NGK_1099	DbhA	*	candidate	875	2.8e-33	B	1	Neisseria_gonorrhoeae_FA_1090_chromosome_	RNA	-	1		Candidate_771_NC_011035(para)	-	-	-	-
Candidate_295_NC_011035	|	NGK_1110		putative_periplasmic_protein	*	>>>	1	|	908723	908790	>>>	67	|	-14	<<<	NGK_1111	recombination_protein_RecR	*	candidate	266	2.9e-05	T	6	Neisseria_gonorrhoeae_FA_1090_chromosome_<>Neisseria_meningitidis_MC58_chromosome_<>Neisseria_meningitidis_Z2491_chromosome_<>Neisseria_meningitidis_FAM18_chromosome_<>Neisseria_meningitidis_053442_chromosome_<>Neisseria_meningitidis_alpha14_chromosome_	-	-	1		Candidate_771_NC_011035(para)	-	-	-	-
Candidate_296_NC_011035	|	NGK_1114		putative_ABC-transporter,_ATP-binding_protein	*	>>>	8	|	913209	913282	>>>	73	|	-4	>>>	NGK_1115	multifunctional_tRNA_nucleotidyl_transferase/2_3_-	*	candidate	337	1.4e-08	T	6	Neisseria_gonorrhoeae_FA_1090_chromosome_<>Neisseria_meningitidis_MC58_chromosome_<>Neisseria_meningitidis_Z2491_chromosome_<>Neisseria_meningitidis_FAM18_chromosome_<>Neisseria_meningitidis_053442_chromosome_<>Neisseria_meningitidis_alpha14_chromosome_	-	-	1		Candidate_771_NC_011035(para)	-	5	-	-
Candidate_297_NC_011035	|	NGK_1118		Holliday_junction_DNA_helicase_RuvB	*	>>>	-5	|	916347	916395	<<<	48	|	200	<<<	NGK_1119	putative_ribulose-phosphate_3-epimerase	*	candidate	133	0.00016	T	5	Neisseria_gonorrhoeae_FA_1090_chromosome_<>Neisseria_meningitidis_MC58_chromosome_<>Neisseria_meningitidis_Z2491_chromosome_<>Neisseria_meningitidis_FAM18_chromosome_<>Neisseria_meningitidis_alpha14_chromosome_	-	-	1		Candidate_771_NC_011035(para)	-	-	-	-
Candidate_298_NC_011035	|	NGK_1118		Holliday_junction_DNA_helicase_RuvB	*	>>>	4	|	916356	916437	>>>	81	|	158	<<<	NGK_1119	putative_ribulose-phosphate_3-epimerase	*	candidate	133	0.00016	T	5	Neisseria_gonorrhoeae_FA_1090_chromosome_<>Neisseria_meningitidis_MC58_chromosome_<>Neisseria_meningitidis_Z2491_chromosome_<>Neisseria_meningitidis_FAM18_chromosome_<>Neisseria_meningitidis_alpha14_chromosome_	RNA	-	6		Candidate_316_NC_011035(para),Candidate_317_NC_011035(para),Candidate_453_NC_011035(para),Candidate_643_NC_011035(para),Candidate_715_NC_011035(para),Candidate_526_NC_011035(para)	-	-	-	-
Candidate_299_NC_011035	|	NGK_1118		Holliday_junction_DNA_helicase_RuvB	*	>>>	176	|	916528	916607	>>>	79	|	-12	<<<	NGK_1119	putative_ribulose-phosphate_3-epimerase	*	candidate	153	7e-05	T	5	Neisseria_gonorrhoeae_FA_1090_chromosome_<>Neisseria_meningitidis_MC58_chromosome_<>Neisseria_meningitidis_Z2491_chromosome_<>Neisseria_meningitidis_FAM18_chromosome_<>Neisseria_meningitidis_alpha14_chromosome_	-	-	1		Candidate_771_NC_011035(para)	-	-	-	-
Candidate_300_NC_011035	|	NGK_1125		NarL/NarP	*	>>>	58	|	922825	922921	<<<	96	|	0	<<<	NGK_1126	hypothetical_protein	*	candidate	775	1.1e-28	B	1	Neisseria_gonorrhoeae_FA_1090_chromosome_	RNA	-	0		Candidate_301_NC_011035(anti)	-	-	-	-
Candidate_302_NC_011035	|	NGK_1129		hypothetical_protein	*	>>>	1	|	925542	925768	>>>	226	|	-17	<<<	NGK_1130	Phosphoribosylaminoimidazole_carboxylase_catalytic	*	candidate	97	0.005	T	6	Neisseria_gonorrhoeae_FA_1090_chromosome_<>Neisseria_meningitidis_MC58_chromosome_<>Neisseria_meningitidis_Z2491_chromosome_<>Neisseria_meningitidis_FAM18_chromosome_<>Neisseria_meningitidis_053442_chromosome_<>Neisseria_meningitidis_alpha14_chromosome_	RNA	-	1		Candidate_771_NC_011035(para)	-	-	-	-
Candidate_303_NC_011035	|	NGK_1140		putative_ATP-dependent_DNA_helicase	*	>>>	6	|	937321	937386	>>>	65	|	-3	<<<	NGK_1141	putative_DNA-damage-inducibile_protein	*	candidate	257	1.6e-05	T	6	Neisseria_gonorrhoeae_FA_1090_chromosome_<>Neisseria_meningitidis_MC58_chromosome_<>Neisseria_meningitidis_Z2491_chromosome_<>Neisseria_meningitidis_FAM18_chromosome_<>Neisseria_meningitidis_053442_chromosome_<>Neisseria_meningitidis_alpha14_chromosome_	-	-	1		Candidate_771_NC_011035(para)	-	-	-	-
Candidate_304_NC_011035	|	NGK_1142		hypothetical_protein	*	>>>	68	|	939119	939236	>>>	117	|	105	>>>	NGK_1143	putative_oxidoreductase	*	candidate	311	6.6e-08	T	4	Neisseria_gonorrhoeae_FA_1090_chromosome_<>Neisseria_meningitidis_Z2491_chromosome_<>Methanosarcina_acetivorans_C2A_chromosome_<>Trichodesmium_erythraeum_IMS101_chromosome_	RNA	-	0	-	-	-	-	-	-E.coli_sig70_2(7.49|-182)
Candidate_305_NC_011035	|	NGK_1176		phosphogluconate_dehydratase	*	>>>	1	|	960361	960447	>>>	86	|	121	>>>	NGK_1177	keto-hydroxyglutarate-aldolase/keto-deoxy-phosphog	*	candidate	284	1.4e-06	T	6	Neisseria_gonorrhoeae_FA_1090_chromosome_<>Neisseria_meningitidis_MC58_chromosome_<>Neisseria_meningitidis_Z2491_chromosome_<>Neisseria_meningitidis_FAM18_chromosome_<>Neisseria_meningitidis_053442_chromosome_<>Neisseria_meningitidis_alpha14_chromosome_	RNA	-	0	-	-	-	-	-	-
Candidate_306_NC_011035	|	NGK_1177		keto-hydroxyglutarate-aldolase/keto-deoxy-phosphog	*	>>>	3	|	961211	961295	>>>	84	|	100	<<<	NGK_1178	hypothetical_protein	*	candidate	207	0.0033	T	6	Neisseria_gonorrhoeae_FA_1090_chromosome_<>Neisseria_meningitidis_MC58_chromosome_<>Neisseria_meningitidis_Z2491_chromosome_<>Neisseria_meningitidis_FAM18_chromosome_<>Neisseria_meningitidis_053442_chromosome_<>Neisseria_meningitidis_alpha14_chromosome_	RNA	-	12		Candidate_307_NC_011035(anti),Candidate_446_NC_011035(para),Candidate_447_NC_011035(para),Candidate_155_NC_011035(para),Candidate_156_NC_011035(para),Candidate_339_NC_011035(para),Candidate_340_NC_011035(para),Candidate_317_NC_011035(para),Candidate_209_NC_011035(para),Candidate_220_NC_011035(para),Candidate_420_NC_011035(para),Candidate_458_NC_011035(para),Candidate_154_NC_011035(para)	-	-	-	-
Candidate_307_NC_011035	|	NGK_1177		keto-hydroxyglutarate-aldolase/keto-deoxy-phosphog	*	>>>	9	|	961217	961351	<<<	134	|	44	<<<	NGK_1178	hypothetical_protein	*	candidate	234	0.0002	T	6	Neisseria_gonorrhoeae_FA_1090_chromosome_<>Neisseria_meningitidis_MC58_chromosome_<>Neisseria_meningitidis_Z2491_chromosome_<>Neisseria_meningitidis_FAM18_chromosome_<>Neisseria_meningitidis_053442_chromosome_<>Neisseria_meningitidis_alpha14_chromosome_	RNA	-	12		Candidate_306_NC_011035(anti),Candidate_446_NC_011035(para),Candidate_447_NC_011035(para),Candidate_155_NC_011035(para),Candidate_156_NC_011035(para),Candidate_339_NC_011035(para),Candidate_340_NC_011035(para),Candidate_317_NC_011035(para),Candidate_209_NC_011035(para),Candidate_220_NC_011035(para),Candidate_420_NC_011035(para),Candidate_458_NC_011035(para),Candidate_154_NC_011035(para)	-	-	-	-E.coli_sig70_2(7.36|-159)E.coli_sig70_3(8.52|-156)
Candidate_309_NC_011035	|	NGK_1219		putative_ferredoxin-NADP_reductase	*	>>>	6	|	995196	995517	<<<	321	|	14	<<<	NGK_1220	hypothetical_protein	*	candidate	201	0.0047	B	6	Neisseria_gonorrhoeae_FA_1090_chromosome_<>Neisseria_meningitidis_MC58_chromosome_<>Neisseria_meningitidis_Z2491_chromosome_<>Neisseria_meningitidis_FAM18_chromosome_<>Neisseria_meningitidis_053442_chromosome_<>Neisseria_meningitidis_alpha14_chromosome_	RNA	-	10		Candidate_28_NC_011035(anti),Candidate_310_NC_011035(anti),Candidate_806_NC_011035(anti),Candidate_603_NC_011035(para),Candidate_678_NC_011035(para),Candidate_677_NC_011035(para),Candidate_125_NC_011035(para),Candidate_759_NC_011035(para),Candidate_636_NC_011035(para),Candidate_637_NC_011035(para),Candidate_59_NC_011035(para),Candidate_698_NC_011035(para),Candidate_399_NC_011035(para)	-	-	-	-
Candidate_311_NC_011035	|	NGK_1219		putative_ferredoxin-NADP_reductase	*	>>>	235	|	995425	995517	<<<	92	|	14	<<<	NGK_1220	hypothetical_protein	*	candidate	201	0.0047	T	7	Neisseria_gonorrhoeae_FA_1090_chromosome_<>Rickettsia_conorii_str._Malish_7_chromosome_<>Neisseria_meningitidis_MC58_chromosome_<>Neisseria_meningitidis_Z2491_chromosome_<>Neisseria_meningitidis_FAM18_chromosome_<>Neisseria_meningitidis_053442_chromosome_<>Neisseria_meningitidis_alpha14_chromosome_	RNA	-	2		Candidate_28_NC_011035(opp),Candidate_310_NC_011035(opp),Candidate_806_NC_011035(opp),Candidate_399_NC_011035(para)	-	-	-	-
Candidate_312_NC_011035	|	NGK_1234		hypothetical_protein	*	>>>	-3	|	1010784	1010867	<<<	83	|	0	<<<	NGK_1235	SuhB	*	candidate	378	5.2e-11	T	6	Neisseria_gonorrhoeae_FA_1090_chromosome_<>Neisseria_meningitidis_MC58_chromosome_<>Neisseria_meningitidis_Z2491_chromosome_<>Neisseria_meningitidis_FAM18_chromosome_<>Neisseria_meningitidis_053442_chromosome_<>Neisseria_meningitidis_alpha14_chromosome_	-	-	1		Candidate_771_NC_011035(para)	-	-	-	-
Candidate_313_NC_011035	|	NGK_1241		hypothetical_protein	*	>>>	1	|	1015690	1015763	>>>	73	|	-27	<<<	NGK_1242	putative_aldehyde_dehydrogenase	*	candidate	226	0.0022	T	4	Neisseria_gonorrhoeae_FA_1090_chromosome_<>Neisseria_meningitidis_MC58_chromosome_<>Neisseria_meningitidis_Z2491_chromosome_<>Neisseria_meningitidis_alpha14_chromosome_	-	-	1		Candidate_771_NC_011035(para)	-	-	-	-
Candidate_314_NC_011035	|	NGK_1251		Pseudouridine_synthase	*	>>>	5	|	1025228	1025302	>>>	74	|	-22	<<<	NGK_1252	putative_membrane_transporter	*	candidate	252	0.0001	T	6	Neisseria_gonorrhoeae_FA_1090_chromosome_<>Neisseria_meningitidis_MC58_chromosome_<>Neisseria_meningitidis_Z2491_chromosome_<>Neisseria_meningitidis_FAM18_chromosome_<>Neisseria_meningitidis_053442_chromosome_<>Neisseria_meningitidis_alpha14_chromosome_	-	-	1		Candidate_771_NC_011035(para)	-	-	-	-
Candidate_315_NC_011035	|	NGK_1258		putative_thioredoxin_I	*	>>>	1	|	1030664	1030728	>>>	64	|	-15	<<<	NGK_1260	hypothetical_protein	*	candidate	210	0.0019	B	6	Neisseria_gonorrhoeae_FA_1090_chromosome_<>Neisseria_meningitidis_MC58_chromosome_<>Neisseria_meningitidis_Z2491_chromosome_<>Neisseria_meningitidis_FAM18_chromosome_<>Neisseria_meningitidis_053442_chromosome_<>Neisseria_meningitidis_alpha14_chromosome_	-	-	1		Candidate_771_NC_011035(para)	-	-	-	-
Candidate_316_NC_011035	|	NGK_1261		putative_ATP-dependent_RNA_helicase	*	>>>	18	|	1033396	1033627	<<<	231	|	100	<<<	NGK_1262	hypothetical_protein	*	candidate	202	0.0042	T	7	Neisseria_gonorrhoeae_FA_1090_chromosome_<>Neisseria_meningitidis_MC58_chromosome_<>Neisseria_meningitidis_Z2491_chromosome_<>Ralstonia_metallidurans_CH34_chromosome_2<>Neisseria_meningitidis_FAM18_chromosome_<>Neisseria_meningitidis_053442_chromosome_<>Neisseria_meningitidis_alpha14_chromosome_	RNA	-	62		Candidate_317_NC_011035(anti),Candidate_281_NC_011035(para),Candidate_282_NC_011035(para),Candidate_68_NC_011035(para),Candidate_553_NC_011035(para),Candidate_713_NC_011035(para),Candidate_650_NC_011035(para),Candidate_362_NC_011035(para),Candidate_590_NC_011035(para),Candidate_789_NC_011035(para),Candidate_710_NC_011035(para),Candidate_325_NC_011035(para),Candidate_529_NC_011035(para),Candidate_…	-	-	-	-E.coli_sig70_2(9.71|-196)
Candidate_317_NC_011035	|	NGK_1261		putative_ATP-dependent_RNA_helicase	*	>>>	1	|	1033379	1033476	>>>	97	|	251	<<<	NGK_1262	hypothetical_protein	*	candidate	110	0.0048	T	6	Neisseria_gonorrhoeae_FA_1090_chromosome_<>Neisseria_meningitidis_MC58_chromosome_<>Neisseria_meningitidis_Z2491_chromosome_<>Neisseria_meningitidis_FAM18_chromosome_<>Neisseria_meningitidis_053442_chromosome_<>Neisseria_meningitidis_alpha14_chromosome_	RNA	-	19		Candidate_316_NC_011035(anti),Candidate_169_NC_011035(para),Candidate_722_NC_011035(para),Candidate_741_NC_011035(para),Candidate_115_NC_011035(para),Candidate_749_NC_011035(para),Candidate_601_NC_011035(para),Candidate_298_NC_011035(para),Candidate_197_NC_011035(para),Candidate_155_NC_011035(para),Candidate_156_NC_011035(para),Candidate_446_NC_011035(para),Candidate_447_NC_011035(para),Candidate…	-	-	-	-
Candidate_318_NC_011035	|	NGK_1267		bifunctional_N-succinyldiaminopimelate-aminotransf	*	>>>	6	|	1036686	1036785	<<<	99	|	0	<<<	NGK_1268	ATP-dependent_protease_ATP-binding_subunit_ClpX	*	candidate	293	1.5e-06	T	6	Neisseria_gonorrhoeae_FA_1090_chromosome_<>Neisseria_meningitidis_MC58_chromosome_<>Neisseria_meningitidis_Z2491_chromosome_<>Neisseria_meningitidis_FAM18_chromosome_<>Neisseria_meningitidis_053442_chromosome_<>Neisseria_meningitidis_alpha14_chromosome_	RNA	-	0	-	-	-	-	-	-
Candidate_319_NC_011035	|	NGK_1267		bifunctional_N-succinyldiaminopimelate-aminotransf	*	>>>	43	|	1036723	1036813	>>>	90	|	-28	<<<	NGK_1268	ATP-dependent_protease_ATP-binding_subunit_ClpX	*	candidate	293	1.5e-06	T	6	Neisseria_gonorrhoeae_FA_1090_chromosome_<>Neisseria_meningitidis_MC58_chromosome_<>Neisseria_meningitidis_Z2491_chromosome_<>Neisseria_meningitidis_FAM18_chromosome_<>Neisseria_meningitidis_053442_chromosome_<>Neisseria_meningitidis_alpha14_chromosome_	RNA	-	1		Candidate_771_NC_011035(para)	-	-	-	-
Candidate_321_NC_011035	|	NGK_1285		DNA_gyrase_subunit_A	*	>>>	1	|	1054148	1054213	>>>	65	|	151	<<<	NGK_1286	IS1016_transposase	*	candidate	99	0.0047	T	6	Neisseria_gonorrhoeae_FA_1090_chromosome_<>Neisseria_meningitidis_MC58_chromosome_<>Neisseria_meningitidis_Z2491_chromosome_<>Neisseria_meningitidis_FAM18_chromosome_<>Neisseria_meningitidis_053442_chromosome_<>Neisseria_meningitidis_alpha14_chromosome_	RNA	-	14		Candidate_68_NC_011035(para),Candidate_553_NC_011035(para),Candidate_713_NC_011035(para),Candidate_373_NC_011035(para),Candidate_599_NC_011035(para),Candidate_703_NC_011035(para),Candidate_733_NC_011035(para),Candidate_529_NC_011035(para),Candidate_699_NC_011035(para),Candidate_702_NC_011035(para),Candidate_245_NC_011035(para),Candidate_403_NC_011035(para),Candidate_469_NC_011035(para),Candidate_…	-	-	-	-
Candidate_322_NC_011035	|	NGK_1287		Gcr	*	>>>	1	|	1057248	1057394	>>>	146	|	-26	<<<	NGK_1288	putative_murein_hydrolase	*	candidate	563	7.3e-20	T	6	Neisseria_gonorrhoeae_FA_1090_chromosome_<>Neisseria_meningitidis_MC58_chromosome_<>Neisseria_meningitidis_Z2491_chromosome_<>Neisseria_meningitidis_FAM18_chromosome_<>Neisseria_meningitidis_053442_chromosome_<>Neisseria_meningitidis_alpha14_chromosome_	-	-	1		Candidate_771_NC_011035(para)	-	-	-	-
Candidate_323_NC_011035	|	NGK_1298		phosphopyruvate_hydratase	*	>>>	13	|	1067663	1067767	>>>	104	|	49	>>>	NGK_1299	Cell_division_protein_ftsB-like_protein	*	candidate	94	0.00038	T	6	Neisseria_gonorrhoeae_FA_1090_chromosome_<>Neisseria_meningitidis_MC58_chromosome_<>Neisseria_meningitidis_Z2491_chromosome_<>Neisseria_meningitidis_FAM18_chromosome_<>Neisseria_meningitidis_053442_chromosome_<>Neisseria_meningitidis_alpha14_chromosome_	RNA	-	6		Candidate_347_NC_011035(para),Candidate_488_NC_011035(para),Candidate_489_NC_011035(para),Candidate_251_NC_011035(para),Candidate_247_NC_011035(para),Candidate_362_NC_011035(para)	-	5	RS	-
Candidate_324_NC_011035	|	NGK_1298		phosphopyruvate_hydratase	*	>>>	13	|	1067663	1067798	>>>	135	|	18	>>>	NGK_1299	Cell_division_protein_ftsB-like_protein	*	candidate	94	0.00038	T	6	Neisseria_gonorrhoeae_FA_1090_chromosome_<>Neisseria_meningitidis_MC58_chromosome_<>Neisseria_meningitidis_Z2491_chromosome_<>Neisseria_meningitidis_FAM18_chromosome_<>Neisseria_meningitidis_053442_chromosome_<>Neisseria_meningitidis_alpha14_chromosome_	RNA	-	6		Candidate_347_NC_011035(para),Candidate_488_NC_011035(para),Candidate_489_NC_011035(para),Candidate_251_NC_011035(para),Candidate_247_NC_011035(para),Candidate_362_NC_011035(para)	-	5	RS	-
Candidate_325_NC_011035	|	NGK_1304		hypothetical_protein	*	>>>	80	|	1073195	1073249	>>>	54	|	127	<<<	NGK_1305	1-acyl-sn-glycerol-3-phosphate_acyltransferase	*	candidate	243	7.4e-05	T	8	Neisseria_gonorrhoeae_FA_1090_chromosome_<>Neisseria_meningitidis_MC58_chromosome_<>Neisseria_meningitidis_Z2491_chromosome_<>Thiobacillus_denitrificans_ATCC_25259_chromosome_<>Neisseria_meningitidis_FAM18_chromosome_<>Neisseria_meningitidis_053442_chromosome_<>Methylotenera_mobilis_JLW8_chromosome_<>Neisseria_meningitidis_alpha14_chromosome_	RNA	-	47		Candidate_280_NC_011035(para),Candidate_789_NC_011035(para),Candidate_546_NC_011035(para),Candidate_281_NC_011035(para),Candidate_282_NC_011035(para),Candidate_316_NC_011035(para),Candidate_722_NC_011035(para),Candidate_650_NC_011035(para),Candidate_362_NC_011035(para),Candidate_590_NC_011035(para),Candidate_713_NC_011035(para),Candidate_412_NC_011035(para),Candidate_153_NC_011035(para),Candidate…	-	-	-	-
Candidate_326_NC_011035	|	NGK_1308		Membrane-bound_lytic_murein_transglycosylase_D	*	>>>	1	|	1077934	1077999	>>>	65	|	0	>>>	NGK_1309	Ribosomal_small_subunit_pseudouridine_synthase_A	*	candidate	335	1.8e-08	T	4	Neisseria_gonorrhoeae_FA_1090_chromosome_<>Neisseria_meningitidis_MC58_chromosome_<>Neisseria_meningitidis_Z2491_chromosome_<>Neisseria_meningitidis_FAM18_chromosome_	-	-	0	-	-	-	5	-	-
Candidate_327_NC_011035	|	NGK_1309		Ribosomal_small_subunit_pseudouridine_synthase_A	*	>>>	1	|	1078694	1078922	>>>	228	|	243	>>>	NGK_1310	putative_sodium-dependent_transport_protein	*	candidate	708	3.2e-26	T	6	Neisseria_gonorrhoeae_FA_1090_chromosome_<>Neisseria_meningitidis_MC58_chromosome_<>Neisseria_meningitidis_Z2491_chromosome_<>Neisseria_meningitidis_FAM18_chromosome_<>Neisseria_meningitidis_053442_chromosome_<>Neisseria_meningitidis_alpha14_chromosome_	-	-	0	-	-	-	-	-	-
Candidate_328_NC_011035	|	NGK_1325		putative_endopeptidase	*	<<<	3	|	1092422	1092498	<<<	76	|	0	<<<	NGK_1326	trigger_factor	*	candidate	337	1e-08	T	6	Neisseria_gonorrhoeae_FA_1090_chromosome_<>Neisseria_meningitidis_MC58_chromosome_<>Neisseria_meningitidis_Z2491_chromosome_<>Neisseria_meningitidis_FAM18_chromosome_<>Neisseria_meningitidis_053442_chromosome_<>Neisseria_meningitidis_alpha14_chromosome_	RNA	-	0	-	-	-	53	-	-
Candidate_329_NC_011035	|	NGK_1327		IS1106_transposase	*	>>>	1	|	1094485	1094709	>>>	224	|	-28	<<<	NGK_1328	cell_division_protein_FtsK	*	candidate	113	0.00053	T	6	Neisseria_gonorrhoeae_FA_1090_chromosome_<>Neisseria_meningitidis_MC58_chromosome_<>Neisseria_meningitidis_Z2491_chromosome_<>Neisseria_meningitidis_FAM18_chromosome_<>Neisseria_meningitidis_053442_chromosome_<>Neisseria_meningitidis_alpha14_chromosome_	RNA	-	1		Candidate_771_NC_011035(para)	-	-	-	-
Candidate_330_NC_011035	|	NGK_1329		putative_ABC_transporter,_permease_protein	*	>>>	1	|	1098555	1098627	>>>	72	|	-28	<<<	NGK_1330	hypothetical_protein	*	candidate	230	0.0015	T	1	Neisseria_gonorrhoeae_FA_1090_chromosome_	-	-	1		Candidate_771_NC_011035(para)	-	-	-	-
Candidate_331_NC_011035	|	NGK_1340		30S_ribosomal_protein_S6	*	<<<	81	|	1103240	1103285	<<<	45	|	88	<<<	NGK_1341	putative_thioredoxin_reductase	*	candidate	250	3.4e-05	B	7	Neisseria_gonorrhoeae_FA_1090_chromosome_<>Neisseria_meningitidis_MC58_chromosome_<>Neisseria_meningitidis_Z2491_chromosome_<>Neisseria_meningitidis_FAM18_chromosome_<>Neisseria_meningitidis_053442_chromosome_<>Acinetobacter_baumannii_ACICU_chromosome_<>Neisseria_meningitidis_alpha14_chromosome_	-	-	0	-	-	-	-	-	-E.coli_sig70_2(10.04|-51)
Candidate_332_NC_011035	|	NGK_1346		tRNA_(guanine-N(7)-)-methyltransferase	*	>>>	17	|	1110958	1111031	>>>	73	|	359	>>>	NGK_1347	hypothetical_protein	*	candidate	754	4e-28	T	6	Neisseria_gonorrhoeae_FA_1090_chromosome_<>Neisseria_meningitidis_MC58_chromosome_<>Neisseria_meningitidis_Z2491_chromosome_<>Neisseria_meningitidis_FAM18_chromosome_<>Neisseria_meningitidis_053442_chromosome_<>Neisseria_meningitidis_alpha14_chromosome_	RNA	-	5		Candidate_90_NC_011035(opp),Candidate_339_NC_011035(para),Candidate_340_NC_011035(para),Candidate_446_NC_011035(para),Candidate_447_NC_011035(para)	-	-	-	-
Candidate_333_NC_011035	|	NGK_1347		hypothetical_protein	*	>>>	145	|	1111653	1111819	>>>	166	|	200	>>>	NGK_1348	carbonic_anhydrase	*	candidate	456	2.8e-14	T	6	Neisseria_gonorrhoeae_FA_1090_chromosome_<>Neisseria_meningitidis_MC58_chromosome_<>Neisseria_meningitidis_Z2491_chromosome_<>Neisseria_meningitidis_FAM18_chromosome_<>Neisseria_meningitidis_053442_chromosome_<>Neisseria_meningitidis_alpha14_chromosome_	RNA	-	1		Candidate_100_NC_011035(para)	-	-	-	-
Candidate_335_NC_011035	|	NGK_1362		putative_dihydrolipoamide_dehydrogenase	*	>>>	12	|	1130459	1130542	>>>	83	|	327	<<<	NGK_1363	hypothetical_protein	*	candidate	167	0.0042	T	6	Neisseria_gonorrhoeae_FA_1090_chromosome_<>Neisseria_meningitidis_MC58_chromosome_<>Neisseria_meningitidis_Z2491_chromosome_<>Neisseria_meningitidis_FAM18_chromosome_<>Neisseria_meningitidis_053442_chromosome_<>Neisseria_meningitidis_alpha14_chromosome_	RNA	-	4		Candidate_336_NC_011035(anti),Candidate_537_NC_011035(para),Candidate_403_NC_011035(para),Candidate_469_NC_011035(para),Candidate_709_NC_011035(para)	-	-	-	-
Candidate_337_NC_011035	|	NGK_1362		putative_dihydrolipoamide_dehydrogenase	*	>>>	263	|	1130710	1130883	>>>	173	|	-14	<<<	NGK_1363	hypothetical_protein	*	candidate	236	0.00022	T	6	Neisseria_gonorrhoeae_FA_1090_chromosome_<>Neisseria_meningitidis_MC58_chromosome_<>Neisseria_meningitidis_Z2491_chromosome_<>Neisseria_meningitidis_FAM18_chromosome_<>Neisseria_meningitidis_053442_chromosome_<>Neisseria_meningitidis_alpha14_chromosome_	RNA	-	1		Candidate_771_NC_011035(para)	-	-	-	-E.coli_sig70_2(7.14|-240)
Candidate_338_NC_011035	|	NGK_1372		aspartate_ammonia-lyase	*	>>>	1	|	1138054	1138139	>>>	85	|	-20	<<<	NGK_1373	hypothetical_protein	*	candidate	335	1.8e-08	T	1	Neisseria_gonorrhoeae_FA_1090_chromosome_	-	-	1		Candidate_771_NC_011035(para)	-	-	-	-
Candidate_339_NC_011035	|	NGK_1382		UPF0021_protein	*	>>>	13	|	1149187	1149265	>>>	78	|	1	<<<	NGK_1383	Type_III_restriction-modification_system_EcoPI_enz	*	candidate	211	0.002	T	6	Neisseria_gonorrhoeae_FA_1090_chromosome_<>Neisseria_meningitidis_MC58_chromosome_<>Neisseria_meningitidis_Z2491_chromosome_<>Neisseria_meningitidis_FAM18_chromosome_<>Neisseria_meningitidis_053442_chromosome_<>Neisseria_meningitidis_alpha14_chromosome_	RNA	-	23		Candidate_340_NC_011035(anti),Candidate_446_NC_011035(para),Candidate_447_NC_011035(para),Candidate_306_NC_011035(para),Candidate_307_NC_011035(para),Candidate_316_NC_011035(para),Candidate_317_NC_011035(para),Candidate_715_NC_011035(para),Candidate_63_NC_011035(para),Candidate_458_NC_011035(para),Candidate_332_NC_011035(para),Candidate_133_NC_011035(para),Candidate_134_NC_011035(para),Candidate_…	-	-	-	-
Candidate_340_NC_011035	|	NGK_1382		UPF0021_protein	*	>>>	11	|	1149185	1149230	<<<	45	|	36	<<<	NGK_1383	Type_III_restriction-modification_system_EcoPI_enz	*	candidate	211	0.002	T	6	Neisseria_gonorrhoeae_FA_1090_chromosome_<>Neisseria_meningitidis_MC58_chromosome_<>Neisseria_meningitidis_Z2491_chromosome_<>Neisseria_meningitidis_FAM18_chromosome_<>Neisseria_meningitidis_053442_chromosome_<>Neisseria_meningitidis_alpha14_chromosome_	RNA	-	23		Candidate_339_NC_011035(anti),Candidate_446_NC_011035(para),Candidate_447_NC_011035(para),Candidate_306_NC_011035(para),Candidate_307_NC_011035(para),Candidate_316_NC_011035(para),Candidate_317_NC_011035(para),Candidate_715_NC_011035(para),Candidate_63_NC_011035(para),Candidate_458_NC_011035(para),Candidate_332_NC_011035(para),Candidate_133_NC_011035(para),Candidate_134_NC_011035(para),Candidate_…	-	-	-	-
Candidate_341_NC_011035	|	NGK_1402		acyl-CoA_synthetase	*	>>>	1	|	1168647	1168732	>>>	85	|	1	<<<	NGK_1403	putative_high-affinity_choline_transport_protein	*	candidate	374	2.3e-10	B	6	Neisseria_gonorrhoeae_FA_1090_chromosome_<>Neisseria_meningitidis_MC58_chromosome_<>Neisseria_meningitidis_Z2491_chromosome_<>Neisseria_meningitidis_FAM18_chromosome_<>Neisseria_meningitidis_053442_chromosome_<>Neisseria_meningitidis_alpha14_chromosome_	RNA	-	0	-	-	-	-	-	-
Candidate_343_NC_011035	|	NGK_1408		putative_integrase	*	>>>	127	|	1175385	1175455	>>>	70	|	179	>>>	NGK_1409	putative_phage_associated_protein	*	candidate	225	0.00073	B	4	Neisseria_gonorrhoeae_FA_1090_chromosome_<>Neisseria_meningitidis_MC58_chromosome_<>Neisseria_meningitidis_FAM18_chromosome_<>Neisseria_meningitidis_alpha14_chromosome_	RNA	-	9		Candidate_576_NC_011035(anti),Candidate_577_NC_011035(tandem),Candidate_540_NC_011035(para),Candidate_541_NC_011035(para),Candidate_197_NC_011035(para),Candidate_102_NC_011035(para),Candidate_232_NC_011035(para),Candidate_760_NC_011035(para),Candidate_729_NC_011035(para),Candidate_373_NC_011035(para),Candidate_599_NC_011035(para)	-	-	-	-E.coli_sig70_3(7.85|-131)
Candidate_344_NC_011035	|	NGK_1408		putative_integrase	*	>>>	100	|	1175358	1175679	>>>	321	|	-45	>>>	NGK_1409	putative_phage_associated_protein	*	candidate	234	0.00029	T	2	Neisseria_meningitidis_MC58_chromosome_<>Neisseria_meningitidis_FAM18_chromosome_	RNA	-	1		Candidate_771_NC_011035(para)	-	5	RS	-E.coli_sig70_2(9.23|-233)E.coli_sig70_2(9.17|-182)E.coli_sig70_3(7.85|-355)
Candidate_345_NC_011035	|	NGK_1409		putative_phage_associated_protein	*	>>>	1	|	1176080	1176163	>>>	83	|	-24	<<<	NGK_1410	Putative_tail_length_tape_measure_protein,_putativ	*	candidate	266	2.7e-05	T	1	Neisseria_gonorrhoeae_FA_1090_chromosome_	-	-	1		Candidate_771_NC_011035(para)	-	-	-	-
Candidate_346_NC_011035	|	NGK_1441		putative_phage_associated_protein	*	<<<	144	|	1200016	1200292	<<<	276	|	0	<<<	NGK_1442	putative_phage_associated_protein	*	candidate	1460	6.4e-60	T	1	Neisseria_gonorrhoeae_FA_1090_chromosome_	RNA	-	2		Candidate_31_NC_011035(anti),Candidate_334_NC_011035(para),Candidate_570_NC_011035(para)	-	-	-	-E.coli_sig70_1(9.09|-205)
Candidate_347_NC_011035	|	NGK_1456		putative_CI_protein	*	>>>	59	|	1209105	1209271	>>>	166	|	12	>>>	NGK_1457	hypothetical_protein	*	candidate	127	0.00038	T	6	Neisseria_gonorrhoeae_FA_1090_chromosome_<>Neisseria_meningitidis_MC58_chromosome_<>Neisseria_meningitidis_Z2491_chromosome_<>Neisseria_meningitidis_FAM18_chromosome_<>Neisseria_meningitidis_053442_chromosome_<>Neisseria_meningitidis_alpha14_chromosome_	RNA	-	6		Candidate_488_NC_011035(para),Candidate_489_NC_011035(para),Candidate_251_NC_011035(para),Candidate_323_NC_011035(para),Candidate_247_NC_011035(para),Candidate_362_NC_011035(para)	-	5	RS	-
Candidate_348_NC_011035	|	NGK_1460		putative_phage_associated_protein	*	>>>	11	|	1211664	1211768	>>>	104	|	-18	<<<	NGK_1461	hypothetical_protein	*	candidate	376	3.3e-11	B	4	Neisseria_gonorrhoeae_FA_1090_chromosome_<>Neisseria_meningitidis_MC58_chromosome_<>Neisseria_meningitidis_FAM18_chromosome_<>Neisseria_meningitidis_alpha14_chromosome_	-	-	1		Candidate_771_NC_011035(para)	-	-	-	-
Candidate_349_NC_011035	|	NGK_trnaLeu5		tRNA-Leu	*	<<<	8	|	1218494	1218635	>>>	141	|	0	>>>	NGK_1474	hypothetical_protein	*	candidate	570	2e-19	T	6	Neisseria_gonorrhoeae_FA_1090_chromosome_<>Neisseria_meningitidis_MC58_chromosome_<>Neisseria_meningitidis_Z2491_chromosome_<>Neisseria_meningitidis_FAM18_chromosome_<>Neisseria_meningitidis_053442_chromosome_<>Neisseria_meningitidis_alpha14_chromosome_	-	-	0	-	-	-	5	-	-E.coli_sig70_2(7.95|-63)
Candidate_350_NC_011035	|	NGK_1477		Irg1	*	>>>	411	|	1221623	1221838	<<<	215	|	7	<<<	NGK_1478	putative_phage_associated_protein	*	candidate	1474	7e-61	T	2	Neisseria_gonorrhoeae_FA_1090_chromosome_<>Neisseria_meningitidis_MC58_chromosome_	RNA	-	6		Candidate_351_NC_011035(anti),Candidate_435_NC_011035(para),Candidate_436_NC_011035(para),Candidate_424_NC_011035(para),Candidate_425_NC_011035(para),Candidate_438_NC_011035(para),Candidate_439_NC_011035(para)	-	-	-	-
Candidate_351_NC_011035	|	NGK_1477		Irg1	*	>>>	257	|	1221469	1221739	>>>	270	|	106	<<<	NGK_1478	putative_phage_associated_protein	*	candidate	1474	7e-61	T	2	Neisseria_gonorrhoeae_FA_1090_chromosome_<>Neisseria_meningitidis_MC58_chromosome_	RNA	-	6		Candidate_350_NC_011035(anti),Candidate_435_NC_011035(para),Candidate_436_NC_011035(para),Candidate_424_NC_011035(para),Candidate_425_NC_011035(para),Candidate_438_NC_011035(para),Candidate_439_NC_011035(para)	-	-	-	-E.coli_sig70_1(7.89|-401)E.coli_sig70_2(8.85|-386)
Candidate_352_NC_011035	|	NGK_1488		hypothetical_protein	*	>>>	11	|	1230403	1230440	<<<	37	|	52	<<<	NGK_1489	nitric_oxide_reductase	*	candidate	231	0.00098	T	6	Neisseria_gonorrhoeae_FA_1090_chromosome_<>Neisseria_meningitidis_MC58_chromosome_<>Neisseria_meningitidis_Z2491_chromosome_<>Neisseria_meningitidis_FAM18_chromosome_<>Neisseria_meningitidis_053442_chromosome_<>Neisseria_meningitidis_alpha14_chromosome_	RNA	-	13		Candidate_353_NC_011035(anti),Candidate_709_NC_011035(para),Candidate_611_NC_011035(para),Candidate_612_NC_011035(para),Candidate_373_NC_011035(para),Candidate_599_NC_011035(para),Candidate_667_NC_011035(para),Candidate_335_NC_011035(para),Candidate_571_NC_011035(para),Candidate_791_NC_011035(para),Candidate_193_NC_011035(para),Candidate_393_NC_011035(para),Candidate_144_NC_011035(para),Candidate…	-	-	-	-
Candidate_353_NC_011035	|	NGK_1488		hypothetical_protein	*	>>>	1	|	1230393	1230463	>>>	70	|	29	<<<	NGK_1489	nitric_oxide_reductase	*	candidate	231	0.00098	T	6	Neisseria_gonorrhoeae_FA_1090_chromosome_<>Neisseria_meningitidis_MC58_chromosome_<>Neisseria_meningitidis_Z2491_chromosome_<>Neisseria_meningitidis_FAM18_chromosome_<>Neisseria_meningitidis_053442_chromosome_<>Neisseria_meningitidis_alpha14_chromosome_	RNA	-	13		Candidate_352_NC_011035(anti),Candidate_709_NC_011035(para),Candidate_611_NC_011035(para),Candidate_612_NC_011035(para),Candidate_373_NC_011035(para),Candidate_599_NC_011035(para),Candidate_667_NC_011035(para),Candidate_335_NC_011035(para),Candidate_571_NC_011035(para),Candidate_791_NC_011035(para),Candidate_193_NC_011035(para),Candidate_393_NC_011035(para),Candidate_144_NC_011035(para),Candidate…	-	-	-	-
Candidate_354_NC_011035	|	NGK_1488		hypothetical_protein	*	>>>	1	|	1230393	1230516	>>>	123	|	-24	<<<	NGK_1489	nitric_oxide_reductase	*	candidate	204	0.0041	T	2	Neisseria_gonorrhoeae_FA_1090_chromosome_<>Neisseria_meningitidis_MC58_chromosome_	RNA	-	1		Candidate_771_NC_011035(para)	-	-	-	-
Candidate_355_NC_011035	|	NGK_1490		AniA	*	>>>	1	|	1234302	1234403	>>>	101	|	74	>>>	NGK_1491	hypothetical_protein	*	candidate	488	1.2e-15	T	5	Neisseria_gonorrhoeae_FA_1090_chromosome_<>Neisseria_meningitidis_MC58_chromosome_<>Neisseria_meningitidis_Z2491_chromosome_<>Neisseria_meningitidis_FAM18_chromosome_<>Neisseria_meningitidis_alpha14_chromosome_	RNA	-	0	-	-	-	5	-	-
Candidate_356_NC_011035	|	NGK_1491		hypothetical_protein	*	>>>	1	|	1235235	1235333	>>>	98	|	172	>>>	NGK_1492	pilin	*	candidate	104	0.0049	T	6	Neisseria_gonorrhoeae_FA_1090_chromosome_<>Neisseria_meningitidis_MC58_chromosome_<>Neisseria_meningitidis_Z2491_chromosome_<>Neisseria_meningitidis_FAM18_chromosome_<>Neisseria_meningitidis_053442_chromosome_<>Neisseria_meningitidis_alpha14_chromosome_	RNA	-	23		Candidate_193_NC_011035(para),Candidate_650_NC_011035(para),Candidate_722_NC_011035(para),Candidate_726_NC_011035(para),Candidate_362_NC_011035(para),Candidate_590_NC_011035(para),Candidate_486_NC_011035(para),Candidate_713_NC_011035(para),Candidate_710_NC_011035(para),Candidate_699_NC_011035(para),Candidate_325_NC_011035(para),Candidate_789_NC_011035(para),Candidate_478_NC_011035(para),Candidate…	-	-	-	-
Candidate_357_NC_011035	|	NGK_1492		pilin	*	>>>	1	|	1235882	1235986	>>>	104	|	54	>>>	NGK_1493	putative_secreted_protein	*	candidate	604	8.4e-22	T	6	Neisseria_gonorrhoeae_FA_1090_chromosome_<>Neisseria_meningitidis_MC58_chromosome_<>Neisseria_meningitidis_Z2491_chromosome_<>Neisseria_meningitidis_FAM18_chromosome_<>Neisseria_meningitidis_053442_chromosome_<>Neisseria_meningitidis_alpha14_chromosome_	-	-	4		Candidate_467_NC_011035(para),Candidate_402_NC_011035(para),Candidate_475_NC_011035(para),Candidate_468_NC_011035(para)	-	5	-	-
Candidate_359_NC_011035	|	NGK_1503		translation_initiation_factor_IF-2	*	>>>	42	|	1246413	1246529	<<<	116	|	0	<<<	NGK_1504	Integral_membrane_protein	*	candidate	667	5.9e-24	B	6	Neisseria_gonorrhoeae_FA_1090_chromosome_<>Neisseria_meningitidis_MC58_chromosome_<>Neisseria_meningitidis_Z2491_chromosome_<>Neisseria_meningitidis_FAM18_chromosome_<>Neisseria_meningitidis_053442_chromosome_<>Neisseria_meningitidis_alpha14_chromosome_	RNA	-	0		Candidate_358_NC_011035(anti),Candidate_589_NC_011035(anti)	-	-	-	-
Candidate_360_NC_011035	|	NGK_1508		hypothetical_protein	*	>>>	1	|	1252593	1252674	>>>	81	|	-25	<<<	NGK_1509	Dsb	*	candidate	281	5.8e-06	T	6	Neisseria_gonorrhoeae_FA_1090_chromosome_<>Neisseria_meningitidis_MC58_chromosome_<>Neisseria_meningitidis_Z2491_chromosome_<>Neisseria_meningitidis_FAM18_chromosome_<>Neisseria_meningitidis_053442_chromosome_<>Neisseria_meningitidis_alpha14_chromosome_	-	-	1		Candidate_771_NC_011035(para)	-	-	-	-
Candidate_361_NC_011035	|	NGK_1511		hypothetical_protein	*	>>>	-19	|	1253404	1253561	<<<	157	|	28	<<<	NGK_1512	hypothetical_protein	*	candidate	201	0.0046	T	11	Neisseria_gonorrhoeae_FA_1090_chromosome_<>Neisseria_meningitidis_MC58_chromosome_<>Neisseria_meningitidis_Z2491_chromosome_<>Chromobacterium_violaceum_ATCC_12472_chromosome_<>Methylobacillus_flagellatus_KT_chromosome_<>Ralstonia_metallidurans_CH34_chromosome_1<>Ralstonia_metallidurans_CH34_chromosome_2<>Neisseria_meningitidis_FAM18_chromosome_<>Actinobacillus_succinogenes_130Z_chromosome_<>Neiss…	-	-	1		Candidate_771_NC_011035(para)	-	-	-	-E.coli_sig70_3(9.87|-183)
Candidate_362_NC_011035	|	NGK_1511		hypothetical_protein	*	>>>	50	|	1253473	1253506	>>>	33	|	83	<<<	NGK_1512	hypothetical_protein	*	candidate	269	3.8e-06	T	10	Neisseria_gonorrhoeae_FA_1090_chromosome_<>Neisseria_meningitidis_MC58_chromosome_<>Neisseria_meningitidis_Z2491_chromosome_<>Chromobacterium_violaceum_ATCC_12472_chromosome_<>Methylobacillus_flagellatus_KT_chromosome_<>Ralstonia_metallidurans_CH34_chromosome_1<>Neisseria_meningitidis_FAM18_chromosome_<>Actinobacillus_succinogenes_130Z_chromosome_<>Neisseria_meningitidis_053442_chromosome_<>Neiss…	RNA	-	26		Candidate_590_NC_011035(anti),Candidate_650_NC_011035(para),Candidate_713_NC_011035(para),Candidate_726_NC_011035(para),Candidate_733_NC_011035(para),Candidate_529_NC_011035(para),Candidate_699_NC_011035(para),Candidate_710_NC_011035(para),Candidate_281_NC_011035(para),Candidate_282_NC_011035(para),Candidate_316_NC_011035(para),Candidate_412_NC_011035(para),Candidate_325_NC_011035(para),Candidate…	-	-	-	-
Candidate_363_NC_011035	|	NGK_1525		putative_phage_associated_protein	*	>>>	1	|	1262214	1262356	>>>	142	|	78	>>>	NGK_1526	hypothetical_protein	*	candidate	1110	3.8e-44	T	1	Neisseria_gonorrhoeae_FA_1090_chromosome_	RNA	-	1		Candidate_647_NC_011035(para),Candidate_592_NC_011035(opp)	-	5	RS	-
Candidate_364_NC_011035	|	NGK_1528		putative_flavoprotein	*	>>>	1	|	1270160	1270248	>>>	88	|	-24	<<<	NGK_1529	Guanosine-3_,5_-bis(Diphosphate)_3_-pyrophophohydr	*	candidate	285	3.3e-06	T	6	Neisseria_gonorrhoeae_FA_1090_chromosome_<>Neisseria_meningitidis_MC58_chromosome_<>Neisseria_meningitidis_Z2491_chromosome_<>Neisseria_meningitidis_FAM18_chromosome_<>Neisseria_meningitidis_053442_chromosome_<>Neisseria_meningitidis_alpha14_chromosome_	-	-	1		Candidate_771_NC_011035(para)	-	-	-	-
Candidate_365_NC_011035	|	NGK_1535		putative_protease	*	>>>	1	|	1276599	1276667	>>>	68	|	60	>>>	NGK_1536	hypothetical_protein	*	candidate	584	5.2e-20	T	5	Neisseria_gonorrhoeae_FA_1090_chromosome_<>Neisseria_meningitidis_Z2491_chromosome_<>Neisseria_meningitidis_FAM18_chromosome_<>Neisseria_meningitidis_053442_chromosome_<>Neisseria_meningitidis_alpha14_chromosome_	-	-	3		Candidate_734_NC_011035(para),Candidate_688_NC_011035(para),Candidate_741_NC_011035(para)	-	5	-	-
Candidate_367_NC_011035	|	NGK_1536		hypothetical_protein	*	>>>	126	|	1277328	1277409	<<<	81	|	0	<<<	NGK_1537	hemoglobin_receptor	*	candidate	953	7.2e-37	T	6	Neisseria_gonorrhoeae_FA_1090_chromosome_<>Neisseria_meningitidis_MC58_chromosome_<>Neisseria_meningitidis_Z2491_chromosome_<>Neisseria_meningitidis_FAM18_chromosome_<>Neisseria_meningitidis_053442_chromosome_<>Neisseria_meningitidis_alpha14_chromosome_	RNA	-	1		Candidate_366_NC_011035(opp)	-	-	-	-
Candidate_369_NC_011035	|	NGK_1550		glycine_dehydrogenase	*	>>>	16	|	1289736	1289790	<<<	54	|	36	<<<	NGK_1551	hypothetical_protein	*	candidate	323	6.1e-08	B	6	Neisseria_gonorrhoeae_FA_1090_chromosome_<>Neisseria_meningitidis_MC58_chromosome_<>Neisseria_meningitidis_Z2491_chromosome_<>Neisseria_meningitidis_FAM18_chromosome_<>Neisseria_meningitidis_053442_chromosome_<>Neisseria_meningitidis_alpha14_chromosome_	RNA	-	26		Candidate_368_NC_011035(anti),Candidate_540_NC_011035(para),Candidate_541_NC_011035(para),Candidate_373_NC_011035(para),Candidate_599_NC_011035(para),Candidate_197_NC_011035(para),Candidate_514_NC_011035(para),Candidate_688_NC_011035(para),Candidate_572_NC_011035(para),Candidate_523_NC_011035(para),Candidate_691_NC_011035(para),Candidate_412_NC_011035(para),Candidate_281_NC_011035(para),Candidate…	-	-	-	-E.coli_sig70_2(8.61|-76)
Candidate_370_NC_011035	|	NGK_1557		hypothetical_protein	*	>>>	1	|	1296411	1296496	>>>	85	|	-14	<<<	NGK_1558	DNA_topoisomerase_IV_subunit_B	*	candidate	351	8.9e-10	T	6	Neisseria_gonorrhoeae_FA_1090_chromosome_<>Neisseria_meningitidis_MC58_chromosome_<>Neisseria_meningitidis_Z2491_chromosome_<>Neisseria_meningitidis_FAM18_chromosome_<>Neisseria_meningitidis_053442_chromosome_<>Neisseria_meningitidis_alpha14_chromosome_	-	-	1		Candidate_771_NC_011035(para)	-	-	-	-
Candidate_371_NC_011035	|	NGK_1560		seryl-tRNA_synthetase	*	>>>	9	|	1300530	1300601	>>>	71	|	-9	<<<	NGK_1561	D-lactate_dehydrogenase	*	candidate	278	5.9e-06	T	6	Neisseria_gonorrhoeae_FA_1090_chromosome_<>Neisseria_meningitidis_MC58_chromosome_<>Neisseria_meningitidis_Z2491_chromosome_<>Neisseria_meningitidis_FAM18_chromosome_<>Neisseria_meningitidis_053442_chromosome_<>Neisseria_meningitidis_alpha14_chromosome_	-	-	1		Candidate_771_NC_011035(para)	-	-	-	-
Candidate_372_NC_011035	|	NGK_1562		peptide_chain_release_factor_1	*	<<<	12	|	1302805	1302881	<<<	76	|	0	<<<	NGK_1563	hypothetical_protein	*	candidate	418	2.4e-12	B	6	Neisseria_gonorrhoeae_FA_1090_chromosome_<>Neisseria_meningitidis_MC58_chromosome_<>Neisseria_meningitidis_Z2491_chromosome_<>Neisseria_meningitidis_FAM18_chromosome_<>Neisseria_meningitidis_053442_chromosome_<>Neisseria_meningitidis_alpha14_chromosome_	-	-	0	-	-	-	53	-	-E.coli_sig70_1(7.61|-41)E.coli_sig70_2(8.08|-41)E.coli_sig70_3(7.57|-41)
Candidate_374_NC_011035	|	NGK_1595		hypothetical_protein	*	>>>	1	|	1326509	1326727	>>>	218	|	-20	<<<	NGK_1596	MtrE	*	candidate	95	0.0046	T	6	Neisseria_gonorrhoeae_FA_1090_chromosome_<>Neisseria_meningitidis_MC58_chromosome_<>Neisseria_meningitidis_Z2491_chromosome_<>Neisseria_meningitidis_FAM18_chromosome_<>Neisseria_meningitidis_053442_chromosome_<>Neisseria_meningitidis_alpha14_chromosome_	RNA	-	1		Candidate_771_NC_011035(para)	-	-	-	-
Candidate_375_NC_011035	|	NGK_1602		antibiotic_resistance_efflux_pump_component	*	>>>	1	|	1335706	1335798	>>>	92	|	-25	<<<	NGK_1603	putative_exodeoxyribonuclease_V	*	candidate	309	2.6e-07	T	6	Neisseria_gonorrhoeae_FA_1090_chromosome_<>Neisseria_meningitidis_MC58_chromosome_<>Neisseria_meningitidis_Z2491_chromosome_<>Neisseria_meningitidis_FAM18_chromosome_<>Neisseria_meningitidis_053442_chromosome_<>Neisseria_meningitidis_alpha14_chromosome_	RNA	-	1		Candidate_771_NC_011035(para)	-	-	-	-
Candidate_377_NC_011035	|	NGK_1613		hypothetical_protein	*	>>>	2	|	1346996	1347431	>>>	435	|	62	<<<	NGK_1614	ExbD	*	candidate	121	0.0035	B	6	Neisseria_gonorrhoeae_FA_1090_chromosome_<>Neisseria_meningitidis_MC58_chromosome_<>Neisseria_meningitidis_Z2491_chromosome_<>Neisseria_meningitidis_FAM18_chromosome_<>Neisseria_meningitidis_053442_chromosome_<>Neisseria_meningitidis_alpha14_chromosome_	RNA	-	46	W	Candidate_603_NC_011035(anti),Candidate_615_NC_011035(para),Candidate_527_NC_011035(para),Candidate_685_NC_011035(para),Candidate_764_NC_011035(para),Candidate_3_NC_011035(para),Candidate_749_NC_011035(para),Candidate_153_NC_011035(para),Candidate_478_NC_011035(para),Candidate_672_NC_011035(para),Candidate_464_NC_011035(para),Candidate_703_NC_011035(para),Candidate_407_NC_011035(para),Candidate_6…	-	-	-	-
Candidate_378_NC_011035	|	NGK_1613		hypothetical_protein	*	>>>	2	|	1346996	1347506	>>>	510	|	-13	<<<	NGK_1614	ExbD	*	candidate	121	0.0035	T	6	Neisseria_gonorrhoeae_FA_1090_chromosome_<>Neisseria_meningitidis_MC58_chromosome_<>Neisseria_meningitidis_Z2491_chromosome_<>Neisseria_meningitidis_FAM18_chromosome_<>Neisseria_meningitidis_053442_chromosome_<>Neisseria_meningitidis_alpha14_chromosome_	RNA	-	1		Candidate_771_NC_011035(para)	-	-	-	-
Candidate_379_NC_011035	|	NGK_1613		hypothetical_protein	*	>>>	2	|	1346996	1347546	>>>	550	|	-53	<<<	NGK_1614	ExbD	*	candidate	121	0.0035	T	1	Neisseria_meningitidis_053442_chromosome_	RNA	-	1		Candidate_771_NC_011035(para)	-	-	-	-
Candidate_380_NC_011035	|	NGK_1617		hypothetical_protein	*	>>>	1	|	1350406	1350493	>>>	87	|	-18	<<<	NGK_1618	glutaredoxin_2	*	candidate	277	2.5e-06	T	6	Neisseria_gonorrhoeae_FA_1090_chromosome_<>Neisseria_meningitidis_MC58_chromosome_<>Neisseria_meningitidis_Z2491_chromosome_<>Neisseria_meningitidis_FAM18_chromosome_<>Neisseria_meningitidis_053442_chromosome_<>Neisseria_meningitidis_alpha14_chromosome_	-	-	1		Candidate_771_NC_011035(para)	-	-	-	-
Candidate_381_NC_011035	|	NGK_1619		putative_GTP_pyrophosphokinase	*	>>>	1	|	1353475	1353557	>>>	82	|	-21	<<<	NGK_1620	hypothetical_protein	*	candidate	211	0.0038	T	6	Neisseria_gonorrhoeae_FA_1090_chromosome_<>Neisseria_meningitidis_MC58_chromosome_<>Neisseria_meningitidis_Z2491_chromosome_<>Neisseria_meningitidis_FAM18_chromosome_<>Neisseria_meningitidis_053442_chromosome_<>Neisseria_meningitidis_alpha14_chromosome_	-	-	1		Candidate_771_NC_011035(para)	-	-	-	-
Candidate_382_NC_011035	|	NGK_1655		glutamyl-tRNA_reductase	*	<<<	66	|	1378965	1379050	<<<	85	|	0	<<<	NGK_1656	glycine_cleavage_system_protein_H	*	candidate	664	1.1e-23	B	6	Neisseria_gonorrhoeae_FA_1090_chromosome_<>Neisseria_meningitidis_MC58_chromosome_<>Neisseria_meningitidis_Z2491_chromosome_<>Neisseria_meningitidis_FAM18_chromosome_<>Neisseria_meningitidis_053442_chromosome_<>Neisseria_meningitidis_alpha14_chromosome_	RNA	-	0	-	-	-	-	-	-
Candidate_383_NC_011035	|	NGK_1673		Na(+)-translocating_NADH-quinone_reductase_subunit	*	>>>	16	|	1391840	1391925	<<<	85	|	216	<<<	NGK_1674	hypothetical_protein	*	candidate	396	1.4e-11	T	6	Neisseria_gonorrhoeae_FA_1090_chromosome_<>Neisseria_meningitidis_MC58_chromosome_<>Neisseria_meningitidis_Z2491_chromosome_<>Neisseria_meningitidis_FAM18_chromosome_<>Neisseria_meningitidis_053442_chromosome_<>Neisseria_meningitidis_alpha14_chromosome_	RNA	-	0		Candidate_384_NC_011035(anti),Candidate_385_NC_011035(anti)	-	-	-	-
Candidate_384_NC_011035	|	NGK_1673		Na(+)-translocating_NADH-quinone_reductase_subunit	*	>>>	2	|	1391826	1391894	>>>	68	|	247	<<<	NGK_1674	hypothetical_protein	*	candidate	381	6.7e-11	T	6	Neisseria_gonorrhoeae_FA_1090_chromosome_<>Neisseria_meningitidis_MC58_chromosome_<>Neisseria_meningitidis_Z2491_chromosome_<>Neisseria_meningitidis_FAM18_chromosome_<>Neisseria_meningitidis_053442_chromosome_<>Neisseria_meningitidis_alpha14_chromosome_	RNA	-	0		Candidate_383_NC_011035(anti),Candidate_385_NC_011035(tandem)	-	-	-	-
Candidate_385_NC_011035	|	NGK_1673		Na(+)-translocating_NADH-quinone_reductase_subunit	*	>>>	1	|	1391825	1392012	>>>	187	|	129	<<<	NGK_1674	hypothetical_protein	*	candidate	905	1.2e-34	T	1	Neisseria_gonorrhoeae_FA_1090_chromosome_	RNA	-	0		Candidate_383_NC_011035(anti),Candidate_384_NC_011035(tandem)	-	-	-	-
Candidate_386_NC_011035	|	NGK_1689		molecular_chaperone_DnaK	*	>>>	1	|	1401460	1401523	>>>	63	|	187	>>>	NGK_1690	hypothetical_protein	*	candidate	655	2.9e-23	B	6	Neisseria_gonorrhoeae_FA_1090_chromosome_<>Neisseria_meningitidis_MC58_chromosome_<>Neisseria_meningitidis_Z2491_chromosome_<>Neisseria_meningitidis_FAM18_chromosome_<>Neisseria_meningitidis_053442_chromosome_<>Neisseria_meningitidis_alpha14_chromosome_	RNA	-	0		Candidate_605_NC_011035(anti)	-	-	-	-
Candidate_387_NC_011035	|	NGK_1695		putative_ABC_transporter,_ATP-binding_protein	*	>>>	36	|	1406719	1406797	>>>	78	|	76	>>>	NGK_1696	CadB	*	candidate	199	0.0046	T	5	Neisseria_gonorrhoeae_FA_1090_chromosome_<>Neisseria_meningitidis_MC58_chromosome_<>Neisseria_meningitidis_FAM18_chromosome_<>Neisseria_meningitidis_053442_chromosome_<>Neisseria_meningitidis_alpha14_chromosome_	RNA	-	2		Candidate_122_NC_011035(para),Candidate_247_NC_011035(para)	-	5	RS	-
Candidate_388_NC_011035	|	NGK_1696		CadB	*	>>>	164	|	1407653	1407726	>>>	73	|	506	>>>	NGK_1697	putative_integral_membrane_protein	*	candidate	169	3.6e-05	T	9	Neisseria_gonorrhoeae_FA_1090_chromosome_<>Neisseria_meningitidis_MC58_chromosome_<>Neisseria_meningitidis_Z2491_chromosome_<>Pseudomonas_fluorescens_Pf0-1_chromosome_<>Neisseria_meningitidis_FAM18_chromosome_<>Enterobacter_sp._638_chromosome_<>Neisseria_meningitidis_053442_chromosome_<>Escherichia_coli_UMN026_chromosome_<>Neisseria_meningitidis_alpha14_chromosome_	RNA	-	1		Candidate_389_NC_011035(tandem)	-	-	-	-
Candidate_389_NC_011035	|	NGK_1696		CadB	*	>>>	1	|	1407490	1407964	>>>	474	|	268	>>>	NGK_1697	putative_integral_membrane_protein	*	candidate	3642	3.6e-159	B	1	Neisseria_gonorrhoeae_FA_1090_chromosome_	RNA	-	1		Candidate_388_NC_011035(tandem)	-	-	-	-E.coli_sig70_1(8.32|-518)E.coli_sig70_1(8.40|-488)E.coli_sig70_3(8.73|-486)
Candidate_390_NC_011035	|	NGK_1699		Thiol:disulphide_interchange_protein	*	>>>	1	|	1412043	1412107	>>>	64	|	32	<<<	NGK_1700	putative_ABC_transporter,_ATP-binding_protein	*	candidate	123	0.00028	B	5	Neisseria_gonorrhoeae_FA_1090_chromosome_<>Neisseria_meningitidis_MC58_chromosome_<>Neisseria_meningitidis_Z2491_chromosome_<>Neisseria_meningitidis_053442_chromosome_<>Neisseria_meningitidis_alpha14_chromosome_	RNA	-	3	W	Candidate_607_NC_011035(anti),Candidate_339_NC_011035(para),Candidate_340_NC_011035(para),Candidate_537_NC_011035(para)	-	-	-	-
Candidate_391_NC_011035	|	NGK_1699		Thiol:disulphide_interchange_protein	*	>>>	1	|	1412043	1412167	>>>	124	|	-28	<<<	NGK_1700	putative_ABC_transporter,_ATP-binding_protein	*	candidate	123	0.00028	T	5	Neisseria_gonorrhoeae_FA_1090_chromosome_<>Neisseria_meningitidis_MC58_chromosome_<>Neisseria_meningitidis_Z2491_chromosome_<>Neisseria_meningitidis_053442_chromosome_<>Neisseria_meningitidis_alpha14_chromosome_	RNA	-	1		Candidate_771_NC_011035(para)	-	-	-	-
Candidate_392_NC_011035	|	NGK_1702		PilV	*	>>>	13	|	1415947	1416035	>>>	88	|	-9	<<<	NGK_1703	hypothetical_protein	*	candidate	204	0.0042	T	4	Neisseria_meningitidis_MC58_chromosome_<>Neisseria_meningitidis_Z2491_chromosome_<>Neisseria_meningitidis_FAM18_chromosome_<>Neisseria_meningitidis_053442_chromosome_	-	-	1		Candidate_771_NC_011035(para)	-	-	-	-
Candidate_393_NC_011035	|	NGK_1706		hypothetical_protein	*	>>>	37	|	1421072	1421148	>>>	76	|	8	>>>	NGK_1707	hypothetical_protein	*	candidate	345	1.7e-09	T	6	Neisseria_gonorrhoeae_FA_1090_chromosome_<>Neisseria_meningitidis_MC58_chromosome_<>Neisseria_meningitidis_Z2491_chromosome_<>Neisseria_meningitidis_FAM18_chromosome_<>Neisseria_meningitidis_053442_chromosome_<>Neisseria_meningitidis_alpha14_chromosome_	RNA	-	10		Candidate_243_NC_011035(para),Candidate_403_NC_011035(para),Candidate_469_NC_011035(para),Candidate_769_NC_011035(para),Candidate_611_NC_011035(para),Candidate_612_NC_011035(para),Candidate_532_NC_011035(para),Candidate_352_NC_011035(para),Candidate_353_NC_011035(para),Candidate_529_NC_011035(para)	-	5	RS	-
Candidate_394_NC_011035	|	NGK_1709		LctP	*	>>>	1	|	1423822	1424005	>>>	183	|	-20	<<<	NGK_1710	hypothetical_protein	*	candidate	689	7.4e-25	T	6	Neisseria_gonorrhoeae_FA_1090_chromosome_<>Neisseria_meningitidis_MC58_chromosome_<>Neisseria_meningitidis_Z2491_chromosome_<>Neisseria_meningitidis_FAM18_chromosome_<>Neisseria_meningitidis_053442_chromosome_<>Neisseria_meningitidis_alpha14_chromosome_	RNA	-	1		Candidate_771_NC_011035(para)	-	-	-	-
Candidate_395_NC_011035	|	NGK_1717		lysyl-tRNA_synthetase	*	<<<	15	|	1428648	1428757	<<<	109	|	29	<<<	NGK_1718	Integral_membrane_protein	*	candidate	529	1.4e-17	T	6	Neisseria_gonorrhoeae_FA_1090_chromosome_<>Neisseria_meningitidis_MC58_chromosome_<>Neisseria_meningitidis_Z2491_chromosome_<>Neisseria_meningitidis_FAM18_chromosome_<>Neisseria_meningitidis_053442_chromosome_<>Neisseria_meningitidis_alpha14_chromosome_	RNA	-	0	-	-	-	5	-	-E.coli_sig70_2(7.21|-57)E.coli_sig70_3(7.85|-57)
Candidate_396_NC_011035	|	NGK_1741		hypothetical_protein	*	>>>	99	|	1446039	1446187	>>>	148	|	-19	<<<	NGK_trnaAsn2	tRNA-Asn	*	candidate	646	3.2e-23	T	6	Neisseria_gonorrhoeae_FA_1090_chromosome_<>Neisseria_meningitidis_MC58_chromosome_<>Neisseria_meningitidis_Z2491_chromosome_<>Neisseria_meningitidis_FAM18_chromosome_<>Neisseria_meningitidis_053442_chromosome_<>Neisseria_meningitidis_alpha14_chromosome_	-	-	1		Candidate_771_NC_011035(para)	-	-	-	-
Candidate_397_NC_011035	|	NGK_1750		hypothetical_protein	*	<<<	121	|	1450464	1450686	<<<	222	|	0	<<<	NGK_1751	Biotin_synthesis_protein_BioC,_putative	*	candidate	338	4.1e-09	T	6	Neisseria_gonorrhoeae_FA_1090_chromosome_<>Neisseria_meningitidis_MC58_chromosome_<>Neisseria_meningitidis_Z2491_chromosome_<>Neisseria_meningitidis_FAM18_chromosome_<>Neisseria_meningitidis_053442_chromosome_<>Neisseria_meningitidis_alpha14_chromosome_	-	-	0	-	-	-	-	-	-E.coli_sig70_2(8.56|-158)
Candidate_398_NC_011035	|	NGK_1767		Spermidine/putrescine_ABC_transporter,_periplasmic	*	>>>	1	|	1465667	1465740	>>>	73	|	525	<<<	NGK_1768	hypothetical_protein	*	candidate	117	0.005	T	6	Neisseria_gonorrhoeae_FA_1090_chromosome_<>Neisseria_meningitidis_MC58_chromosome_<>Neisseria_meningitidis_Z2491_chromosome_<>Neisseria_meningitidis_FAM18_chromosome_<>Neisseria_meningitidis_053442_chromosome_<>Neisseria_meningitidis_alpha14_chromosome_	RNA	-	5		Candidate_615_NC_011035(opp),Candidate_405_NC_011035(para),Candidate_619_NC_011035(para),Candidate_366_NC_011035(para),Candidate_596_NC_011035(para)	-	-	-	-
Candidate_399_NC_011035	|	NGK_1770		hypothetical_protein	*	<<<	205	|	1467628	1467668	<<<	40	|	97	<<<	NGK_1771	transferrin-binding_protein_A	*	candidate	213	0.0033	T	8	Neisseria_gonorrhoeae_FA_1090_chromosome_<>Neisseria_meningitidis_MC58_chromosome_<>Neisseria_meningitidis_Z2491_chromosome_<>Shewanella_sp._W3-18-1_chromosome_<>Neisseria_meningitidis_FAM18_chromosome_<>Sphingomonas_wittichii_RW1_chromosome_<>Neisseria_meningitidis_053442_chromosome_<>Neisseria_meningitidis_alpha14_chromosome_	RNA	-	23		Candidate_766_NC_011035(para),Candidate_691_NC_011035(para),Candidate_636_NC_011035(para),Candidate_70_NC_011035(para),Candidate_678_NC_011035(para),Candidate_59_NC_011035(para),Candidate_698_NC_011035(para),Candidate_637_NC_011035(para),Candidate_538_NC_011035(para),Candidate_125_NC_011035(para),Candidate_759_NC_011035(para),Candidate_602_NC_011035(para),Candidate_534_NC_011035(para),Candidate_7…	-	-	-	-
Candidate_400_NC_011035	|	NGK_1779		hypothetical_protein	*	>>>	44	|	1476210	1476245	>>>	35	|	77	>>>	NGK_1780	hypothetical_protein	*	candidate	556	1.8e-19	B	5	Neisseria_gonorrhoeae_FA_1090_chromosome_<>Neisseria_meningitidis_MC58_chromosome_<>Neisseria_meningitidis_Z2491_chromosome_<>Neisseria_meningitidis_FAM18_chromosome_<>Neisseria_meningitidis_053442_chromosome_	-	-	0	-	-	-	5	-	-
Candidate_401_NC_011035	|	NGK_1780		hypothetical_protein	*	>>>	188	|	1477621	1477764	<<<	143	|	0	<<<	NGK_1781	hypothetical_protein	*	candidate	1531	2.3e-63	T	3	Neisseria_gonorrhoeae_FA_1090_chromosome_<>Neisseria_meningitidis_MC58_chromosome_<>Neisseria_meningitidis_053442_chromosome_	RNA	-	0	-	-	-	-	-	-E.coli_sig70_2(7.33|-247)
Candidate_402_NC_011035	|	NGK_1796		pilin	*	>>>	1	|	1490279	1490383	>>>	104	|	54	>>>	NGK_1797	putative_secreted_protein	*	candidate	595	2.1e-21	T	6	Neisseria_gonorrhoeae_FA_1090_chromosome_<>Neisseria_meningitidis_MC58_chromosome_<>Neisseria_meningitidis_Z2491_chromosome_<>Neisseria_meningitidis_FAM18_chromosome_<>Neisseria_meningitidis_053442_chromosome_<>Neisseria_meningitidis_alpha14_chromosome_	-	-	4		Candidate_475_NC_011035(para),Candidate_357_NC_011035(para),Candidate_467_NC_011035(para),Candidate_468_NC_011035(para)	-	5	-	-
Candidate_403_NC_011035	|	NGK_1799		outer_membrane_preprotein_PIIc	*	>>>	1	|	1491651	1491716	>>>	65	|	213	<<<	NGK_1800	Nitrilase	*	candidate	106	0.0049	T	6	Neisseria_gonorrhoeae_FA_1090_chromosome_<>Neisseria_meningitidis_MC58_chromosome_<>Neisseria_meningitidis_Z2491_chromosome_<>Neisseria_meningitidis_FAM18_chromosome_<>Neisseria_meningitidis_053442_chromosome_<>Neisseria_meningitidis_alpha14_chromosome_	RNA	-	9		Candidate_469_NC_011035(para),Candidate_243_NC_011035(para),Candidate_615_NC_011035(para),Candidate_126_NC_011035(para),Candidate_393_NC_011035(para),Candidate_335_NC_011035(para),Candidate_336_NC_011035(para),Candidate_571_NC_011035(para),Candidate_321_NC_011035(para)	-	-	-	-
Candidate_404_NC_011035	|	NGK_1801		putative_oxidoreductase	*	>>>	1	|	1493701	1493782	>>>	81	|	-26	<<<	NGK_1802	Hypothetical_integral_membrane_protein	*	candidate	246	0.00023	T	6	Neisseria_gonorrhoeae_FA_1090_chromosome_<>Neisseria_meningitidis_MC58_chromosome_<>Neisseria_meningitidis_Z2491_chromosome_<>Neisseria_meningitidis_FAM18_chromosome_<>Neisseria_meningitidis_053442_chromosome_<>Neisseria_meningitidis_alpha14_chromosome_	-	-	1		Candidate_771_NC_011035(para)	-	-	-	-
Candidate_406_NC_011035	|	NGK_1804		Nitric_oxide-sensitive_repressor	*	>>>	46	|	1495988	1496139	>>>	151	|	-37	<<<	NGK_1806	hypothetical_protein	*	candidate	535	8.9e-18	T	6	Neisseria_gonorrhoeae_FA_1090_chromosome_<>Neisseria_meningitidis_MC58_chromosome_<>Neisseria_meningitidis_Z2491_chromosome_<>Neisseria_meningitidis_FAM18_chromosome_<>Neisseria_meningitidis_053442_chromosome_<>Neisseria_meningitidis_alpha14_chromosome_	-	-	1		Candidate_771_NC_011035(para)	-	-	-	-
Candidate_407_NC_011035	|	NGK_1809		hypothetical_protein	*	<<<	56	|	1499564	1500056	<<<	492	|	0	<<<	NGK_1810	aconitate_hydratase	*	candidate	119	0.0046	T	6	Neisseria_gonorrhoeae_FA_1090_chromosome_<>Neisseria_meningitidis_MC58_chromosome_<>Neisseria_meningitidis_Z2491_chromosome_<>Neisseria_meningitidis_FAM18_chromosome_<>Neisseria_meningitidis_053442_chromosome_<>Neisseria_meningitidis_alpha14_chromosome_	RNA	-	48		Candidate_620_NC_011035(opp),Candidate_527_NC_011035(para),Candidate_210_NC_011035(para),Candidate_491_NC_011035(para),Candidate_492_NC_011035(para),Candidate_493_NC_011035(para),Candidate_676_NC_011035(para),Candidate_702_NC_011035(para),Candidate_551_NC_011035(para),Candidate_552_NC_011035(para),Candidate_711_NC_011035(para),Candidate_693_NC_011035(para),Candidate_478_NC_011035(para),Candidate_…	-	-	RS	-
Candidate_408_NC_011035	|	NGK_1812		hypothetical_protein	*	<<<	54	|	1503582	1503678	<<<	96	|	0	<<<	NGK_1813	methylcitrate_synthase	*	candidate	638	1.6e-22	T	3	Neisseria_gonorrhoeae_FA_1090_chromosome_<>Neisseria_meningitidis_MC58_chromosome_<>Neisseria_meningitidis_Z2491_chromosome_	RNA	-	0	-	-	-	-	-	-
Candidate_409_NC_011035	|	NGK_1815		hypothetical_protein	*	>>>	291	|	1506315	1506420	>>>	105	|	-14	<<<	NGK_1816	hypothetical_protein	*	candidate	219	0.0012	T	187	Methanocaldococcus_jannaschii_DSM_2661_chromosome_<>Helicobacter_pylori_26695_chromosome_<>Rickettsia_prowazekii_str._Madrid_E_chromosome_<>Ureaplasma_parvum_serovar_3_str._ATCC_700970_chromosome_<>Vibrio_cholerae_O1_biovar_El_Tor_str._N16961_chromosome_II<>Lactococcus_lactis_subsp._lactis_Il1403_chromosome_<>Thermoplasma_volcanium_GSS1_chromosome_<>Staphylococcus_aureus_subsp._aureus_N315_chromo…	-	-	1		Candidate_771_NC_011035(para)	-	-	-	-E.coli_sig70_1(7.71|-111)E.coli_sig70_1(7.25|-91)E.coli_sig70_2(8.17|-111)
Candidate_410_NC_011035	|	NGK_trnaAla2		tRNA-Ala	*	>>>	3	|	1529692	1529873	<<<	181	|	0	<<<	NGK_1837	BacA	*	candidate	279	8.4e-33	T	6	Neisseria_gonorrhoeae_FA_1090_chromosome_<>Neisseria_meningitidis_MC58_chromosome_<>Neisseria_meningitidis_Z2491_chromosome_<>Neisseria_meningitidis_FAM18_chromosome_<>Neisseria_meningitidis_053442_chromosome_<>Neisseria_meningitidis_alpha14_chromosome_	RNA	-	0	-	-	-	-	-	-
Candidate_411_NC_011035	|	NGK_trnaAla2		tRNA-Ala	*	>>>	1	|	1529690	1529898	>>>	208	|	-25	<<<	NGK_1837	BacA	*	candidate	279	8.4e-33	T	6	Neisseria_gonorrhoeae_FA_1090_chromosome_<>Neisseria_meningitidis_MC58_chromosome_<>Neisseria_meningitidis_Z2491_chromosome_<>Neisseria_meningitidis_FAM18_chromosome_<>Neisseria_meningitidis_053442_chromosome_<>Neisseria_meningitidis_alpha14_chromosome_	RNA	-	1		Candidate_771_NC_011035(para)	-	-	-	-
Candidate_412_NC_011035	|	NGK_1846		bifunctional_proline_dehydrogenase/pyrroline-5-car	*	>>>	1	|	1540047	1540140	>>>	93	|	287	>>>	NGK_1847	outer_membrane_protein	*	candidate	113	0.0028	T	6	Neisseria_gonorrhoeae_FA_1090_chromosome_<>Neisseria_meningitidis_MC58_chromosome_<>Neisseria_meningitidis_Z2491_chromosome_<>Neisseria_meningitidis_FAM18_chromosome_<>Neisseria_meningitidis_053442_chromosome_<>Neisseria_meningitidis_alpha14_chromosome_	RNA	-	52		Candidate_281_NC_011035(para),Candidate_282_NC_011035(para),Candidate_316_NC_011035(para),Candidate_733_NC_011035(para),Candidate_650_NC_011035(para),Candidate_362_NC_011035(para),Candidate_590_NC_011035(para),Candidate_726_NC_011035(para),Candidate_325_NC_011035(para),Candidate_789_NC_011035(para),Candidate_713_NC_011035(para),Candidate_529_NC_011035(para),Candidate_699_NC_011035(para),Candidate…	-	-	-	-
Candidate_413_NC_011035	|	NGK_1853		hypothetical_protein	*	>>>	13	|	1543135	1543198	>>>	63	|	196	<<<	NGK_1854	putative_exodeoxyribonuclease_III	*	candidate	125	6.3e-06	T	6	Neisseria_gonorrhoeae_FA_1090_chromosome_<>Neisseria_meningitidis_MC58_chromosome_<>Neisseria_meningitidis_Z2491_chromosome_<>Neisseria_meningitidis_FAM18_chromosome_<>Neisseria_meningitidis_053442_chromosome_<>Neisseria_meningitidis_alpha14_chromosome_	RNA	NC_003112_SRP_bact(-)_-_(hom|rev)	9		Candidate_241_NC_011035(para),Candidate_197_NC_011035(para),Candidate_148_NC_011035(para),Candidate_667_NC_011035(para),Candidate_477_NC_011035(para),Candidate_660_NC_011035(para),Candidate_185_NC_011035(para),Candidate_368_NC_011035(para),Candidate_369_NC_011035(para)	-	-	-	-
Candidate_414_NC_011035	|	NGK_1853		hypothetical_protein	*	>>>	220	|	1543342	1543418	>>>	76	|	-24	<<<	NGK_1854	putative_exodeoxyribonuclease_III	*	candidate	131	0.0014	T	6	Neisseria_gonorrhoeae_FA_1090_chromosome_<>Neisseria_meningitidis_MC58_chromosome_<>Neisseria_meningitidis_Z2491_chromosome_<>Neisseria_meningitidis_FAM18_chromosome_<>Neisseria_meningitidis_053442_chromosome_<>Neisseria_meningitidis_alpha14_chromosome_	-	-	1		Candidate_771_NC_011035(para)	-	-	-	-
Candidate_415_NC_011035	|	NGK_1856		hypothetical_protein	*	>>>	1	|	1544831	1544982	>>>	151	|	-24	<<<	NGK_1857	hypothetical_protein	*	candidate	84	0.0041	T	6	Neisseria_gonorrhoeae_FA_1090_chromosome_<>Neisseria_meningitidis_MC58_chromosome_<>Neisseria_meningitidis_Z2491_chromosome_<>Neisseria_meningitidis_FAM18_chromosome_<>Neisseria_meningitidis_053442_chromosome_<>Neisseria_meningitidis_alpha14_chromosome_	-	-	1		Candidate_771_NC_011035(para)	-	-	-	-
Candidate_417_NC_011035	|	NGK_1871		putative_ABC_transporter_ATP-binding_protein	*	>>>	1	|	1558120	1558189	>>>	69	|	-12	<<<	NGK_1872	Phosphatidylglycerophosphatase_A	*	candidate	286	3.4e-06	T	6	Neisseria_gonorrhoeae_FA_1090_chromosome_<>Neisseria_meningitidis_MC58_chromosome_<>Neisseria_meningitidis_Z2491_chromosome_<>Neisseria_meningitidis_FAM18_chromosome_<>Neisseria_meningitidis_053442_chromosome_<>Neisseria_meningitidis_alpha14_chromosome_	-	-	1		Candidate_771_NC_011035(para)	-	-	-	-
Candidate_418_NC_011035	|	NGK_1878		transcriptional_regulator_CysB-like_protein	*	>>>	39	|	1562451	1562523	<<<	72	|	0	<<<	NGK_1879	putative_anaerobic_transcriptional_regulator	*	candidate	533	1.2e-17	B	6	Neisseria_gonorrhoeae_FA_1090_chromosome_<>Neisseria_meningitidis_MC58_chromosome_<>Neisseria_meningitidis_Z2491_chromosome_<>Neisseria_meningitidis_FAM18_chromosome_<>Neisseria_meningitidis_053442_chromosome_<>Neisseria_meningitidis_alpha14_chromosome_	RNA	-	0		Candidate_42_NC_011035(anti),Candidate_419_NC_011035(anti)	-	3	-	-
Candidate_420_NC_011035	|	NGK_1899		hypothetical_protein	*	>>>	61	|	1577184	1577241	>>>	57	|	152	>>>	NGK_1900	hypothetical_protein	*	candidate	217	0.00072	T	11	Neisseria_gonorrhoeae_FA_1090_chromosome_<>Neisseria_meningitidis_MC58_chromosome_<>Neisseria_meningitidis_Z2491_chromosome_<>Neisseria_meningitidis_FAM18_chromosome_<>Streptococcus_suis_05ZYH33_chromosome_<>Streptococcus_suis_98HAH33_chromosome_<>Neisseria_meningitidis_053442_chromosome_<>Streptococcus_suis_SC84_chromosome_<>Streptococcus_suis_P1/7_chromosome_<>Streptococcus_suis_BM407_chromosom…	RNA	-	14		Candidate_710_NC_011035(para),Candidate_486_NC_011035(para),Candidate_601_NC_011035(para),Candidate_155_NC_011035(para),Candidate_156_NC_011035(para),Candidate_63_NC_011035(para),Candidate_220_NC_011035(para),Candidate_209_NC_011035(para),Candidate_306_NC_011035(para),Candidate_307_NC_011035(para),Candidate_458_NC_011035(para),Candidate_133_NC_011035(para),Candidate_134_NC_011035(para),Candidate_…	-	-	-	-E.coli_sig70_2(9.17|-184)
Candidate_421_NC_011035	|	NGK_1901		hypothetical_protein	*	>>>	3	|	1579145	1579228	<<<	83	|	415	<<<	NGK_1902	UPF0213_protein	*	candidate	403	1.2e-11	T	5	Neisseria_meningitidis_MC58_chromosome_<>Neisseria_meningitidis_Z2491_chromosome_<>Neisseria_meningitidis_FAM18_chromosome_<>Neisseria_meningitidis_053442_chromosome_<>Neisseria_meningitidis_alpha14_chromosome_	RNA	-	1		Candidate_429_NC_011035(para)	-	-	-	-
Candidate_422_NC_011035	|	NGK_1901		hypothetical_protein	*	>>>	398	|	1579540	1579702	>>>	162	|	-59	<<<	NGK_1902	UPF0213_protein	*	candidate	507	2e-16	T	6	Neisseria_gonorrhoeae_FA_1090_chromosome_<>Neisseria_meningitidis_MC58_chromosome_<>Neisseria_meningitidis_Z2491_chromosome_<>Neisseria_meningitidis_FAM18_chromosome_<>Neisseria_meningitidis_053442_chromosome_<>Neisseria_meningitidis_alpha14_chromosome_	-	-	1		Candidate_771_NC_011035(para)	-	-	-	-
Candidate_423_NC_011035	|	NGK_1916		glutamyl-Q_tRNA(Asp)_synthetase	*	>>>	1	|	1591099	1591175	>>>	76	|	-9	<<<	NGK_1917	tRNA-dihydrouridine_synthase_A	*	candidate	327	4.1e-08	T	6	Neisseria_gonorrhoeae_FA_1090_chromosome_<>Neisseria_meningitidis_MC58_chromosome_<>Neisseria_meningitidis_Z2491_chromosome_<>Neisseria_meningitidis_FAM18_chromosome_<>Neisseria_meningitidis_053442_chromosome_<>Neisseria_meningitidis_alpha14_chromosome_	-	-	1		Candidate_771_NC_011035(para)	-	-	-	-
Candidate_424_NC_011035	|	NGK_1948		hypothetical_protein	*	>>>	75	|	1608901	1609113	<<<	212	|	23	<<<	NGK_1949	putative_phage_associated_protein	*	candidate	551	3.4e-19	T	2	Neisseria_gonorrhoeae_FA_1090_chromosome_<>Neisseria_meningitidis_MC58_chromosome_	RNA	-	6		Candidate_425_NC_011035(anti),Candidate_438_NC_011035(para),Candidate_439_NC_011035(para),Candidate_435_NC_011035(para),Candidate_436_NC_011035(para),Candidate_350_NC_011035(para),Candidate_351_NC_011035(para)	-	-	-	-
Candidate_425_NC_011035	|	NGK_1948		hypothetical_protein	*	>>>	1	|	1608827	1609017	>>>	190	|	119	<<<	NGK_1949	putative_phage_associated_protein	*	candidate	551	3.4e-19	T	2	Neisseria_gonorrhoeae_FA_1090_chromosome_<>Neisseria_meningitidis_MC58_chromosome_	RNA	-	6		Candidate_424_NC_011035(anti),Candidate_438_NC_011035(para),Candidate_439_NC_011035(para),Candidate_435_NC_011035(para),Candidate_436_NC_011035(para),Candidate_350_NC_011035(para),Candidate_351_NC_011035(para)	-	-	-	-
Candidate_426_NC_011035	|	NGK_1957		hypothetical_protein	*	<<<	1	|	1615433	1615522	<<<	89	|	23	<<<	NGK_1958	Putative_very_short_patch_repair_endonuclease	*	candidate	273	1.8e-06	T	6	Neisseria_gonorrhoeae_FA_1090_chromosome_<>Neisseria_meningitidis_MC58_chromosome_<>Neisseria_meningitidis_Z2491_chromosome_<>Neisseria_meningitidis_FAM18_chromosome_<>Neisseria_meningitidis_053442_chromosome_<>Neisseria_meningitidis_alpha14_chromosome_	RNA	-	1		Candidate_196_NC_011035(para)	-	5	RS	-
Candidate_428_NC_011035	|	NGK_1970		phosphoribosylformylglycinamidine_synthase	*	>>>	1	|	1632887	1632988	>>>	101	|	-33	<<<	NGK_1971	FMN_oxidoreductase_CC3083	*	candidate	350	2.6e-09	T	1	Neisseria_gonorrhoeae_FA_1090_chromosome_	-	-	1		Candidate_771_NC_011035(para)	-	-	-	-
Candidate_429_NC_011035	|	NGK_1974		GloB	*	>>>	12	|	1635549	1635617	>>>	68	|	152	>>>	NGK_1975	MgtE	*	candidate	993	1e-38	T	6	Neisseria_gonorrhoeae_FA_1090_chromosome_<>Neisseria_meningitidis_MC58_chromosome_<>Neisseria_meningitidis_Z2491_chromosome_<>Neisseria_meningitidis_FAM18_chromosome_<>Neisseria_meningitidis_053442_chromosome_<>Neisseria_meningitidis_alpha14_chromosome_	RNA	-	8		Candidate_83_NC_011035(anti),Candidate_514_NC_011035(para),Candidate_688_NC_011035(para),Candidate_421_NC_011035(para),Candidate_131_NC_011035(para),Candidate_373_NC_011035(para),Candidate_599_NC_011035(para),Candidate_540_NC_011035(para),Candidate_541_NC_011035(para)	-	-	-	-
Candidate_430_NC_011035	|	NGK_1974		GloB	*	>>>	12	|	1635549	1635681	>>>	132	|	88	>>>	NGK_1975	MgtE	*	candidate	993	1e-38	B	6	Neisseria_gonorrhoeae_FA_1090_chromosome_<>Neisseria_meningitidis_MC58_chromosome_<>Neisseria_meningitidis_Z2491_chromosome_<>Neisseria_meningitidis_FAM18_chromosome_<>Neisseria_meningitidis_053442_chromosome_<>Neisseria_meningitidis_alpha14_chromosome_	RNA	-	8		Candidate_83_NC_011035(anti),Candidate_514_NC_011035(para),Candidate_688_NC_011035(para),Candidate_421_NC_011035(para),Candidate_131_NC_011035(para),Candidate_373_NC_011035(para),Candidate_599_NC_011035(para),Candidate_540_NC_011035(para),Candidate_541_NC_011035(para)	-	-	RS	-
Candidate_431_NC_011035	|	NGK_1975		MgtE	*	>>>	1	|	1637226	1637340	>>>	114	|	-31	<<<	NGK_1976	Hsp33-like_chaperonin	*	candidate	371	3.4e-10	T	6	Neisseria_gonorrhoeae_FA_1090_chromosome_<>Neisseria_meningitidis_MC58_chromosome_<>Neisseria_meningitidis_Z2491_chromosome_<>Neisseria_meningitidis_FAM18_chromosome_<>Neisseria_meningitidis_053442_chromosome_<>Neisseria_meningitidis_alpha14_chromosome_	RNA	-	1		Candidate_771_NC_011035(para)	-	-	-	-
Candidate_432_NC_011035	|	NGK_1978		hypothetical_protein	*	>>>	1	|	1639370	1639432	>>>	62	|	80	>>>	NGK_1979	hypothetical_protein	*	candidate	245	0.00029	B	6	Neisseria_gonorrhoeae_FA_1090_chromosome_<>Neisseria_meningitidis_MC58_chromosome_<>Neisseria_meningitidis_Z2491_chromosome_<>Neisseria_meningitidis_FAM18_chromosome_<>Neisseria_meningitidis_053442_chromosome_<>Neisseria_meningitidis_alpha14_chromosome_	-	-	0	-	-	-	-	-	-
Candidate_434_NC_011035	|	NGK_1988		HrpA	*	>>>	1	|	1651491	1651613	>>>	122	|	-5	<<<	NGK_1989	Irg2	*	candidate	586	4.7e-20	T	1	Neisseria_gonorrhoeae_FA_1090_chromosome_	RNA	-	1		Candidate_771_NC_011035(para)	-	-	-	-E.coli_sig70_1(7.82|-122)E.coli_sig70_1(7.12|-81)
Candidate_435_NC_011035	|	NGK_1990		hypothetical_protein	*	>>>	1	|	1652787	1652977	>>>	190	|	105	<<<	NGK_1991	putative_phage_associated_protein	*	candidate	601	1.9e-21	T	2	Neisseria_gonorrhoeae_FA_1090_chromosome_<>Neisseria_meningitidis_MC58_chromosome_	RNA	-	6		Candidate_436_NC_011035(anti),Candidate_350_NC_011035(para),Candidate_351_NC_011035(para),Candidate_424_NC_011035(para),Candidate_425_NC_011035(para),Candidate_438_NC_011035(para),Candidate_439_NC_011035(para)	-	-	-	-
Candidate_436_NC_011035	|	NGK_1990		hypothetical_protein	*	>>>	75	|	1652861	1653075	<<<	214	|	7	<<<	NGK_1991	putative_phage_associated_protein	*	candidate	601	1.9e-21	T	2	Neisseria_gonorrhoeae_FA_1090_chromosome_<>Neisseria_meningitidis_MC58_chromosome_	RNA	-	6		Candidate_435_NC_011035(anti),Candidate_350_NC_011035(para),Candidate_351_NC_011035(para),Candidate_424_NC_011035(para),Candidate_425_NC_011035(para),Candidate_438_NC_011035(para),Candidate_439_NC_011035(para)	-	-	-	-
Candidate_437_NC_011035	|	NGK_2021		hypothetical_protein	*	>>>	1	|	1674114	1674319	>>>	205	|	-5	<<<	NGK_2022	Irg2	*	candidate	200	0.0048	T	2	Neisseria_gonorrhoeae_FA_1090_chromosome_<>Neisseria_meningitidis_FAM18_chromosome_	RNA	-	1		Candidate_771_NC_011035(para)	-	-	-	-E.coli_sig70_1(7.12|-81)
Candidate_438_NC_011035	|	NGK_2023		hypothetical_protein	*	>>>	1	|	1675493	1675683	>>>	190	|	119	<<<	NGK_2024	putative_phage_associated_protein	*	candidate	551	3.4e-19	T	2	Neisseria_gonorrhoeae_FA_1090_chromosome_<>Neisseria_meningitidis_MC58_chromosome_	RNA	-	6		Candidate_424_NC_011035(para),Candidate_425_NC_011035(para),Candidate_439_NC_011035(anti),Candidate_435_NC_011035(para),Candidate_436_NC_011035(para),Candidate_350_NC_011035(para),Candidate_351_NC_011035(para)	-	-	-	-
Candidate_439_NC_011035	|	NGK_2023		hypothetical_protein	*	>>>	75	|	1675567	1675779	<<<	212	|	23	<<<	NGK_2024	putative_phage_associated_protein	*	candidate	551	3.4e-19	T	2	Neisseria_gonorrhoeae_FA_1090_chromosome_<>Neisseria_meningitidis_MC58_chromosome_	RNA	-	6		Candidate_424_NC_011035(para),Candidate_425_NC_011035(para),Candidate_438_NC_011035(anti),Candidate_435_NC_011035(para),Candidate_436_NC_011035(para),Candidate_350_NC_011035(para),Candidate_351_NC_011035(para)	-	-	-	-
Candidate_440_NC_011035	|	NGK_2029		putative_phage_associated_protein	*	>>>	1	|	1680262	1680364	>>>	102	|	158	>>>	NGK_2030	Irg7	*	candidate	1034	1.5e-40	T	5	Neisseria_gonorrhoeae_FA_1090_chromosome_<>Neisseria_meningitidis_MC58_chromosome_<>Neisseria_meningitidis_Z2491_chromosome_<>Neisseria_meningitidis_FAM18_chromosome_<>Neisseria_meningitidis_053442_chromosome_	RNA	-	0	-	-	-	-	-	-
Candidate_441_NC_011035	|	NGK_2033		hypothetical_protein	*	>>>	1	|	1682765	1682877	>>>	112	|	40	<<<	NGK_2034	hypothetical_protein	*	candidate	673	1.3e-24	T	1	Neisseria_gonorrhoeae_FA_1090_chromosome_	RNA	-	0	-	-	-	-	-	-
Candidate_442_NC_011035	|	NGK_2033		hypothetical_protein	*	>>>	1	|	1682765	1682903	>>>	138	|	14	<<<	NGK_2034	hypothetical_protein	*	candidate	673	1.3e-24	B	1	Neisseria_gonorrhoeae_FA_1090_chromosome_	RNA	-	0	-	-	-	-	-	-
Candidate_443_NC_011035	|	NGK_2037		putative_phage_associated_protein	*	<<<	129	|	1684649	1685017	<<<	368	|	0	<<<	NGK_2038	hypothetical_protein	*	candidate	1701	7.1e-71	T	1	Neisseria_gonorrhoeae_FA_1090_chromosome_	RNA	-	0	-	-	-	-	-	-E.coli_sig70_2(8.14|-110)E.coli_sig70_2(9.43|-330)
Candidate_444_NC_011035	|	NGK_2037		putative_phage_associated_protein	*	<<<	178	|	1684698	1685017	<<<	319	|	0	<<<	NGK_2038	hypothetical_protein	*	candidate	1701	7.1e-71	B	1	Neisseria_gonorrhoeae_FA_1090_chromosome_	RNA	-	0	-	-	-	-	-	-E.coli_sig70_2(8.14|-61)E.coli_sig70_2(9.43|-281)
Candidate_445_NC_011035	|	NGK_2047		tspA_protein	*	>>>	1	|	1691557	1691629	>>>	72	|	98	<<<	NGK_2048	lactoylglutathione_lyase	*	candidate	842	8.9e-32	B	6	Neisseria_gonorrhoeae_FA_1090_chromosome_<>Neisseria_meningitidis_MC58_chromosome_<>Neisseria_meningitidis_Z2491_chromosome_<>Neisseria_meningitidis_FAM18_chromosome_<>Neisseria_meningitidis_053442_chromosome_<>Neisseria_meningitidis_alpha14_chromosome_	RNA	-	0	-	-	-	-	-	-
Candidate_446_NC_011035	|	NGK_2052		branched-chain_amino_acid_aminotransferase	*	>>>	1	|	1694974	1695064	>>>	90	|	152	<<<	NGK_2053	enoyl-(acyl_carrier_protein)_reductase	*	candidate	1079	1.2e-42	T	6	Neisseria_gonorrhoeae_FA_1090_chromosome_<>Neisseria_meningitidis_MC58_chromosome_<>Neisseria_meningitidis_Z2491_chromosome_<>Neisseria_meningitidis_FAM18_chromosome_<>Neisseria_meningitidis_053442_chromosome_<>Neisseria_meningitidis_alpha14_chromosome_	RNA	-	23		Candidate_447_NC_011035(anti),Candidate_339_NC_011035(para),Candidate_340_NC_011035(para),Candidate_306_NC_011035(para),Candidate_307_NC_011035(para),Candidate_154_NC_011035(para),Candidate_316_NC_011035(para),Candidate_317_NC_011035(para),Candidate_133_NC_011035(para),Candidate_134_NC_011035(para),Candidate_526_NC_011035(para),Candidate_90_NC_011035(para),Candidate_332_NC_011035(para),Candidate_…	-	-	-	-
Candidate_447_NC_011035	|	NGK_2052		branched-chain_amino_acid_aminotransferase	*	>>>	11	|	1694984	1695068	<<<	84	|	148	<<<	NGK_2053	enoyl-(acyl_carrier_protein)_reductase	*	candidate	438	1.5e-13	T	6	Neisseria_gonorrhoeae_FA_1090_chromosome_<>Neisseria_meningitidis_MC58_chromosome_<>Neisseria_meningitidis_Z2491_chromosome_<>Neisseria_meningitidis_FAM18_chromosome_<>Neisseria_meningitidis_053442_chromosome_<>Neisseria_meningitidis_alpha14_chromosome_	RNA	-	23		Candidate_446_NC_011035(anti),Candidate_339_NC_011035(para),Candidate_340_NC_011035(para),Candidate_306_NC_011035(para),Candidate_307_NC_011035(para),Candidate_154_NC_011035(para),Candidate_316_NC_011035(para),Candidate_317_NC_011035(para),Candidate_133_NC_011035(para),Candidate_134_NC_011035(para),Candidate_526_NC_011035(para),Candidate_90_NC_011035(para),Candidate_332_NC_011035(para),Candidate_…	-	-	-	-
Candidate_448_NC_011035	|	NGK_2056		PilG	*	>>>	1	|	1700575	1700642	>>>	67	|	4	>>>	NGK_2057	PilD	*	candidate	302	5.2e-07	B	6	Neisseria_gonorrhoeae_FA_1090_chromosome_<>Neisseria_meningitidis_MC58_chromosome_<>Neisseria_meningitidis_Z2491_chromosome_<>Neisseria_meningitidis_FAM18_chromosome_<>Neisseria_meningitidis_053442_chromosome_<>Neisseria_meningitidis_alpha14_chromosome_	RNA	-	0	-	-	-	5	-	-
Candidate_449_NC_011035	|	NGK_2067		hypothetical_protein	*	>>>	1	|	1708252	1708339	>>>	87	|	-41	<<<	NGK_2068	50S_ribosomal_protein_L33	*	candidate	240	8.8e-05	B	6	Neisseria_gonorrhoeae_FA_1090_chromosome_<>Neisseria_meningitidis_MC58_chromosome_<>Neisseria_meningitidis_Z2491_chromosome_<>Neisseria_meningitidis_FAM18_chromosome_<>Neisseria_meningitidis_053442_chromosome_<>Neisseria_meningitidis_alpha14_chromosome_	-	-	1		Candidate_771_NC_011035(para)	-	-	-	-
Candidate_450_NC_011035	|	NGK_2073		7-cyano-7-deazaguanine_reductase	*	>>>	2	|	1712435	1712519	>>>	84	|	-13	>>>	NGK_2074	hypothetical_protein	*	candidate	323	5.6e-08	T	6	Neisseria_gonorrhoeae_FA_1090_chromosome_<>Neisseria_meningitidis_MC58_chromosome_<>Neisseria_meningitidis_Z2491_chromosome_<>Neisseria_meningitidis_FAM18_chromosome_<>Neisseria_meningitidis_053442_chromosome_<>Neisseria_meningitidis_alpha14_chromosome_	-	-	1		Candidate_771_NC_011035(para)	-	5	-	-
Candidate_451_NC_011035	|	NGK_2074		hypothetical_protein	*	>>>	60	|	1713254	1713561	>>>	307	|	-19	<<<	NGK_2075	hypothetical_protein	*	candidate	208	0.0042	T	8	Neisseria_gonorrhoeae_FA_1090_chromosome_<>Neisseria_meningitidis_MC58_chromosome_<>Neisseria_meningitidis_Z2491_chromosome_<>Shewanella_sp._W3-18-1_chromosome_<>Neisseria_meningitidis_FAM18_chromosome_<>Sphingomonas_wittichii_RW1_chromosome_<>Neisseria_meningitidis_053442_chromosome_<>Neisseria_meningitidis_alpha14_chromosome_	RNA	-	1		Candidate_771_NC_011035(para)	-	-	-	-
Candidate_452_NC_011035	|	NGK_2076		hypothetical_protein	*	>>>	1	|	1715882	1715979	>>>	97	|	-22	<<<	NGK_2077	hypothetical_protein	*	candidate	205	0.0042	T	6	Neisseria_gonorrhoeae_FA_1090_chromosome_<>Neisseria_meningitidis_MC58_chromosome_<>Neisseria_meningitidis_Z2491_chromosome_<>Neisseria_meningitidis_FAM18_chromosome_<>Neisseria_meningitidis_053442_chromosome_<>Neisseria_meningitidis_alpha14_chromosome_	-	-	1		Candidate_771_NC_011035(para)	-	-	-	-
Candidate_453_NC_011035	|	NGK_2078		putative_outer_membrane_protein_OmpU	*	<<<	124	|	1717615	1717791	<<<	176	|	0	<<<	NGK_2080	putative_virulence_associated_protein	*	candidate	1229	1.9e-49	T	6	Neisseria_gonorrhoeae_FA_1090_chromosome_<>Neisseria_meningitidis_MC58_chromosome_<>Neisseria_meningitidis_Z2491_chromosome_<>Neisseria_meningitidis_FAM18_chromosome_<>Neisseria_meningitidis_053442_chromosome_<>Neisseria_meningitidis_alpha14_chromosome_	RNA	-	3		Candidate_298_NC_011035(para),Candidate_446_NC_011035(para),Candidate_447_NC_011035(para)	-	-	-	-
Candidate_454_NC_011035	|	NGK_2093		major_outer_membrane_protein	*	>>>	1	|	1723303	1723496	>>>	193	|	-58	<<<	NGK_2094	hypothetical_protein	*	candidate	685	1.5e-24	T	1	Neisseria_gonorrhoeae_FA_1090_chromosome_	RNA	-	1		Candidate_771_NC_011035(para)	-	-	-	-
Candidate_455_NC_011035	|	NGK_2098		Signal_recognition_particle_signal_sequence_bindin	*	>>>	1	|	1732691	1732761	>>>	70	|	183	>>>	NGK_2099	hypothetical_protein	*	candidate	1257	1.1e-50	T	1	Neisseria_gonorrhoeae_FA_1090_chromosome_	RNA	-	2		Candidate_81_NC_011035(anti),Candidate_477_NC_011035(para),Candidate_660_NC_011035(para)	-	-	-	-
Candidate_456_NC_011035	|	NGK_2099		hypothetical_protein	*	>>>	1	|	1733402	1733469	>>>	67	|	-15	<<<	NGK_2100	hypothetical_protein	*	candidate	261	2.7e-05	T	6	Neisseria_gonorrhoeae_FA_1090_chromosome_<>Neisseria_meningitidis_MC58_chromosome_<>Neisseria_meningitidis_Z2491_chromosome_<>Neisseria_meningitidis_FAM18_chromosome_<>Neisseria_meningitidis_053442_chromosome_<>Neisseria_meningitidis_alpha14_chromosome_	-	-	1		Candidate_771_NC_011035(para)	-	-	-	-
Candidate_457_NC_011035	|	NGK_2101		Irg1	*	>>>	11	|	1734898	1735005	<<<	107	|	0	<<<	NGK_2102	hypothetical_protein	*	candidate	586	4.7e-20	T	1	Neisseria_gonorrhoeae_FA_1090_chromosome_	-	-	0	-	-	-	-	-	-E.coli_sig70_1(7.12|-66)
Candidate_458_NC_011035	|	NGK_2105		putative_deoxyribodopyrimidine_photolyase	*	>>>	3	|	1737961	1738055	>>>	94	|	0	>>>	NGK_2106	ATP-dependent_DNA_helicase_DinG	*	candidate	213	0.0018	T	6	Neisseria_gonorrhoeae_FA_1090_chromosome_<>Neisseria_meningitidis_MC58_chromosome_<>Neisseria_meningitidis_Z2491_chromosome_<>Neisseria_meningitidis_FAM18_chromosome_<>Neisseria_meningitidis_053442_chromosome_<>Neisseria_meningitidis_alpha14_chromosome_	-	-	15		Candidate_339_NC_011035(para),Candidate_340_NC_011035(para),Candidate_306_NC_011035(para),Candidate_307_NC_011035(para),Candidate_317_NC_011035(para),Candidate_420_NC_011035(para),Candidate_446_NC_011035(para),Candidate_447_NC_011035(para),Candidate_220_NC_011035(para),Candidate_604_NC_011035(para),Candidate_526_NC_011035(para),Candidate_155_NC_011035(para),Candidate_156_NC_011035(para),Candidate…	-	5	-	-
Candidate_459_NC_011035	|	NGK_2112		Ribonuclease_II-related_protein	*	>>>	357	|	1747492	1747635	>>>	143	|	-23	<<<	NGK_2113	putative_cis-trans_isomerase	*	candidate	161	1.7e-05	T	16	Neisseria_gonorrhoeae_FA_1090_chromosome_<>Neisseria_meningitidis_MC58_chromosome_<>Neisseria_meningitidis_Z2491_chromosome_<>Rickettsia_felis_URRWXCal2_chromosome_<>Chlorobium_chlorochromatii_CaD3_chromosome_<>Rickettsia_bellii_RML369-C_chromosome_<>Neisseria_meningitidis_FAM18_chromosome_<>Polaromonas_naphthalenivorans_CJ2_chromosome_<>Sphingomonas_wittichii_RW1_chromosome_<>Rickettsia_ricketts…	-	-	1		Candidate_771_NC_011035(para)	-	-	-	-
Candidate_460_NC_011035	|	NGK_2115		hypothetical_protein	*	>>>	1	|	1752197	1752272	>>>	75	|	-21	<<<	NGK_2116	putative_thiol:disulphide_interchange_protein	*	candidate	280	6.6e-06	T	6	Neisseria_gonorrhoeae_FA_1090_chromosome_<>Neisseria_meningitidis_MC58_chromosome_<>Neisseria_meningitidis_Z2491_chromosome_<>Neisseria_meningitidis_FAM18_chromosome_<>Neisseria_meningitidis_053442_chromosome_<>Neisseria_meningitidis_alpha14_chromosome_	-	-	1		Candidate_771_NC_011035(para)	-	-	-	-
Candidate_461_NC_011035	|	NGK_2128		hypothetical_protein	*	>>>	1	|	1764927	1765013	>>>	86	|	-7	>>>	NGK_2129	Holliday_junction_DNA_helicase_RuvA	*	candidate	391	4.4e-11	T	6	Neisseria_gonorrhoeae_FA_1090_chromosome_<>Neisseria_meningitidis_MC58_chromosome_<>Neisseria_meningitidis_Z2491_chromosome_<>Neisseria_meningitidis_FAM18_chromosome_<>Neisseria_meningitidis_053442_chromosome_<>Neisseria_meningitidis_alpha14_chromosome_	-	-	1		Candidate_771_NC_011035(para)	-	5	-	-
Candidate_462_NC_011035	|	NGK_2134		IspA	*	>>>	-4	|	1769752	1769861	<<<	109	|	10	<<<	NGK_2135	Hypothetical_inner_membrane_protein	*	candidate	224	0.00081	B	6	Neisseria_gonorrhoeae_FA_1090_chromosome_<>Neisseria_meningitidis_MC58_chromosome_<>Neisseria_meningitidis_Z2491_chromosome_<>Neisseria_meningitidis_FAM18_chromosome_<>Neisseria_meningitidis_053442_chromosome_<>Neisseria_meningitidis_alpha14_chromosome_	RNA	-	1		Candidate_771_NC_011035(para)	-	-	-	-
Candidate_463_NC_011035	|	NGK_2134		IspA	*	>>>	1	|	1769757	1769882	>>>	125	|	-11	<<<	NGK_2135	Hypothetical_inner_membrane_protein	*	candidate	499	4.4e-16	T	6	Neisseria_gonorrhoeae_FA_1090_chromosome_<>Neisseria_meningitidis_MC58_chromosome_<>Neisseria_meningitidis_Z2491_chromosome_<>Neisseria_meningitidis_FAM18_chromosome_<>Neisseria_meningitidis_053442_chromosome_<>Neisseria_meningitidis_alpha14_chromosome_	RNA	-	1		Candidate_771_NC_011035(para)	-	-	-	-
Candidate_464_NC_011035	|	NGK_2154		hypothetical_protein	*	>>>	1	|	1787726	1788024	>>>	298	|	65	<<<	NGK_2156	Putative_inner_membrane_protein	*	candidate	114	0.0037	T	6	Neisseria_gonorrhoeae_FA_1090_chromosome_<>Neisseria_meningitidis_MC58_chromosome_<>Neisseria_meningitidis_Z2491_chromosome_<>Neisseria_meningitidis_FAM18_chromosome_<>Neisseria_meningitidis_053442_chromosome_<>Neisseria_meningitidis_alpha14_chromosome_	RNA	-	55		Candidate_465_NC_011035(anti),Candidate_527_NC_011035(para),Candidate_703_NC_011035(para),Candidate_661_NC_011035(para),Candidate_622_NC_011035(para),Candidate_623_NC_011035(para),Candidate_702_NC_011035(para),Candidate_478_NC_011035(para),Candidate_672_NC_011035(para),Candidate_551_NC_011035(para),Candidate_552_NC_011035(para),Candidate_711_NC_011035(para),Candidate_676_NC_011035(para),Candidate…	-	-	-	-Multi_Fur(14.62|-285)
Candidate_465_NC_011035	|	NGK_2154		hypothetical_protein	*	>>>	220	|	1787945	1788089	<<<	144	|	0	<<<	NGK_2156	Putative_inner_membrane_protein	*	candidate	114	0.0037	T	6	Neisseria_gonorrhoeae_FA_1090_chromosome_<>Neisseria_meningitidis_MC58_chromosome_<>Neisseria_meningitidis_Z2491_chromosome_<>Neisseria_meningitidis_FAM18_chromosome_<>Neisseria_meningitidis_053442_chromosome_<>Neisseria_meningitidis_alpha14_chromosome_	RNA	-	35		Candidate_464_NC_011035(anti),Candidate_527_NC_011035(para),Candidate_703_NC_011035(para),Candidate_622_NC_011035(para),Candidate_623_NC_011035(para),Candidate_478_NC_011035(para),Candidate_672_NC_011035(para),Candidate_551_NC_011035(para),Candidate_711_NC_011035(para),Candidate_676_NC_011035(para),Candidate_693_NC_011035(para),Candidate_493_NC_011035(para),Candidate_3_NC_011035(para),Candidate_7…	-	-	-	-
Candidate_466_NC_011035	|	NGK_2155		hypothetical_protein	*	>>>	-3	|	1789443	1789563	<<<	120	|	0	<<<	NGK_2157	Putative_inner_membrane_protein	*	candidate	386	7.7e-11	T	1	Neisseria_meningitidis_alpha14_chromosome_	RNA	-	1		Candidate_771_NC_011035(para)	-	-	-	-
Candidate_467_NC_011035	|	NGK_2162		pilin	*	>>>	1	|	1792479	1792583	>>>	104	|	290	>>>	NGK_2163	UDP-3-O-%5B3-hydroxymyristoyl%5D_N-acetylglucosami	*	candidate	111	0.0046	T	6	Neisseria_gonorrhoeae_FA_1090_chromosome_<>Neisseria_meningitidis_MC58_chromosome_<>Neisseria_meningitidis_Z2491_chromosome_<>Neisseria_meningitidis_FAM18_chromosome_<>Neisseria_meningitidis_053442_chromosome_<>Neisseria_meningitidis_alpha14_chromosome_	RNA	-	28		Candidate_475_NC_011035(para),Candidate_357_NC_011035(para),Candidate_402_NC_011035(para),Candidate_468_NC_011035(para),Candidate_661_NC_011035(para),Candidate_281_NC_011035(para),Candidate_282_NC_011035(para),Candidate_412_NC_011035(para),Candidate_733_NC_011035(para),Candidate_153_NC_011035(para),Candidate_464_NC_011035(para),Candidate_650_NC_011035(para),Candidate_529_NC_011035(para),Candidate…	-	-	-	-
Candidate_468_NC_011035	|	NGK_2164		PilE/pilin_(PilE)	*	>>>	1	|	1794440	1794544	>>>	104	|	196	>>>	NGK_2165	pilS_cassette	*	candidate	110	0.0048	T	6	Neisseria_gonorrhoeae_FA_1090_chromosome_<>Neisseria_meningitidis_MC58_chromosome_<>Neisseria_meningitidis_Z2491_chromosome_<>Neisseria_meningitidis_FAM18_chromosome_<>Neisseria_meningitidis_053442_chromosome_<>Neisseria_meningitidis_alpha14_chromosome_	RNA	-	13		Candidate_475_NC_011035(para),Candidate_467_NC_011035(para),Candidate_402_NC_011035(para),Candidate_357_NC_011035(para),Candidate_527_NC_011035(para),Candidate_696_NC_011035(para),Candidate_538_NC_011035(para),Candidate_534_NC_011035(para),Candidate_407_NC_011035(para),Candidate_636_NC_011035(para),Candidate_399_NC_011035(para),Candidate_698_NC_011035(para),Candidate_637_NC_011035(para)	-	-	-	-
Candidate_469_NC_011035	|	NGK_2170		outer_membrane_preprotein_PIIc	*	>>>	1	|	1797099	1797164	>>>	65	|	194	<<<	NGK_2171	putative_signal_recognition_particle_protein	*	candidate	103	0.005	T	6	Neisseria_gonorrhoeae_FA_1090_chromosome_<>Neisseria_meningitidis_MC58_chromosome_<>Neisseria_meningitidis_Z2491_chromosome_<>Neisseria_meningitidis_FAM18_chromosome_<>Neisseria_meningitidis_053442_chromosome_<>Neisseria_meningitidis_alpha14_chromosome_	RNA	-	23		Candidate_403_NC_011035(para),Candidate_243_NC_011035(para),Candidate_691_NC_011035(para),Candidate_125_NC_011035(para),Candidate_637_NC_011035(para),Candidate_399_NC_011035(para),Candidate_527_NC_011035(para),Candidate_696_NC_011035(para),Candidate_698_NC_011035(para),Candidate_677_NC_011035(para),Candidate_538_NC_011035(para),Candidate_615_NC_011035(para),Candidate_602_NC_011035(para),Candidate…	-	-	-	-
Candidate_470_NC_011035	|	NGK_2172		trifunctional_thioredoxin/methionine_sulfoxide_red	*	>>>	1	|	1800328	1800424	>>>	96	|	-15	<<<	NGK_2173	Competence/damage-inducible_protein_CinA_C-termina	*	candidate	378	1.4e-10	T	6	Neisseria_gonorrhoeae_FA_1090_chromosome_<>Neisseria_meningitidis_MC58_chromosome_<>Neisseria_meningitidis_Z2491_chromosome_<>Neisseria_meningitidis_FAM18_chromosome_<>Neisseria_meningitidis_053442_chromosome_<>Neisseria_meningitidis_alpha14_chromosome_	-	-	1		Candidate_771_NC_011035(para)	-	-	-	-
Candidate_471_NC_011035	|	NGK_2172		trifunctional_thioredoxin/methionine_sulfoxide_red	*	>>>	1	|	1800328	1800466	>>>	138	|	-57	<<<	NGK_2173	Competence/damage-inducible_protein_CinA_C-termina	*	candidate	378	1.4e-10	T	6	Neisseria_gonorrhoeae_FA_1090_chromosome_<>Neisseria_meningitidis_MC58_chromosome_<>Neisseria_meningitidis_Z2491_chromosome_<>Neisseria_meningitidis_FAM18_chromosome_<>Neisseria_meningitidis_053442_chromosome_<>Neisseria_meningitidis_alpha14_chromosome_	RNA	-	1		Candidate_771_NC_011035(para)	-	-	-	-
Candidate_472_NC_011035	|	NGK_2179		PhnA	*	>>>	1	|	1805734	1805826	>>>	92	|	-23	<<<	NGK_2180	Possible_periplasmic_protein	*	candidate	346	5.5e-09	T	1	Neisseria_gonorrhoeae_FA_1090_chromosome_	RNA	-	1		Candidate_771_NC_011035(para)	-	-	-	-
Candidate_473_NC_011035	|	NGK_2189		methionyl-tRNA_synthetase	*	>>>	2	|	1815702	1815787	>>>	85	|	-14	<<<	NGK_2190	putative_dehydrogenase_related_protein	*	candidate	288	2.2e-06	T	5	Neisseria_gonorrhoeae_FA_1090_chromosome_<>Neisseria_meningitidis_MC58_chromosome_<>Neisseria_meningitidis_Z2491_chromosome_<>Neisseria_meningitidis_FAM18_chromosome_<>Neisseria_meningitidis_alpha14_chromosome_	-	-	1		Candidate_771_NC_011035(para)	-	-	-	-
Candidate_474_NC_011035	|	NGK_2193		L-pilin	*	>>>	113	|	1817858	1817915	>>>	57	|	239	>>>	NGK_2194	large_pilS_cassette	*	candidate	205	0.003	T	10	Neisseria_gonorrhoeae_FA_1090_chromosome_<>Neisseria_meningitidis_MC58_chromosome_<>Neisseria_meningitidis_Z2491_chromosome_<>Rickettsia_felis_URRWXCal2_chromosome_<>Neisseria_meningitidis_FAM18_chromosome_<>Polaromonas_naphthalenivorans_CJ2_chromosome_<>Sphingomonas_wittichii_RW1_chromosome_<>Rickettsia_massiliae_MTU5_chromosome_<>Neisseria_meningitidis_053442_chromosome_<>Neisseria_meningitidis…	RNA	-	19		Candidate_766_NC_011035(para),Candidate_538_NC_011035(para),Candidate_80_NC_011035(para),Candidate_125_NC_011035(para),Candidate_759_NC_011035(para),Candidate_527_NC_011035(para),Candidate_534_NC_011035(para),Candidate_701_NC_011035(para),Candidate_733_NC_011035(para),Candidate_636_NC_011035(para),Candidate_637_NC_011035(para),Candidate_59_NC_011035(para),Candidate_399_NC_011035(para),Candidate_6…	-	-	-	-
Candidate_475_NC_011035	|	NGK_2194		large_pilS_cassette	*	>>>	1	|	1819329	1819433	>>>	104	|	381	<<<	NGK_2195	thiamine_biosynthesis_protein_ThiC	*	candidate	120	0.0048	T	6	Neisseria_gonorrhoeae_FA_1090_chromosome_<>Neisseria_meningitidis_MC58_chromosome_<>Neisseria_meningitidis_Z2491_chromosome_<>Neisseria_meningitidis_FAM18_chromosome_<>Neisseria_meningitidis_053442_chromosome_<>Neisseria_meningitidis_alpha14_chromosome_	-	-	8		Candidate_467_NC_011035(para),Candidate_402_NC_011035(para),Candidate_357_NC_011035(para),Candidate_468_NC_011035(para),Candidate_474_NC_011035(para),Candidate_156_NC_011035(para),Candidate_306_NC_011035(para),Candidate_209_NC_011035(para)	-	-	-	-
Candidate_476_NC_011035	|	NGK_2194		large_pilS_cassette	*	>>>	412	|	1819740	1819840	>>>	100	|	-26	<<<	NGK_2195	thiamine_biosynthesis_protein_ThiC	*	candidate	155	0.00013	T	6	Neisseria_gonorrhoeae_FA_1090_chromosome_<>Neisseria_meningitidis_MC58_chromosome_<>Neisseria_meningitidis_Z2491_chromosome_<>Neisseria_meningitidis_FAM18_chromosome_<>Neisseria_meningitidis_053442_chromosome_<>Neisseria_meningitidis_alpha14_chromosome_	-	-	1		Candidate_771_NC_011035(para)	-	-	-	-
Candidate_478_NC_011035	|	NGK_2232		pilS_cassette	*	>>>	163	|	1855370	1855419	>>>	49	|	11	>>>	NGK_2233	Thiamine_biosynthesis_protein_ThiS	*	candidate	115	0.00044	T	7	Neisseria_gonorrhoeae_FA_1090_chromosome_<>Neisseria_meningitidis_MC58_chromosome_<>Neisseria_meningitidis_Z2491_chromosome_<>Neisseria_meningitidis_FAM18_chromosome_<>Actinobacillus_succinogenes_130Z_chromosome_<>Neisseria_meningitidis_053442_chromosome_<>Neisseria_meningitidis_alpha14_chromosome_	-	-	53		Candidate_672_NC_011035(tandem),Candidate_551_NC_011035(para),Candidate_552_NC_011035(para),Candidate_711_NC_011035(para),Candidate_693_NC_011035(para),Candidate_703_NC_011035(para),Candidate_685_NC_011035(para),Candidate_527_NC_011035(para),Candidate_622_NC_011035(para),Candidate_623_NC_011035(para),Candidate_749_NC_011035(para),Candidate_785_NC_011035(para),Candidate_676_NC_011035(para),Candida…	-	5	-	-
Candidate_479_NC_011035	|	NGK_2236		hypothetical_protein	*	>>>	1	|	1857018	1857246	>>>	228	|	-22	<<<	NGK_2237	Periplasmic_protein	*	candidate	881	1.2e-33	T	6	Neisseria_gonorrhoeae_FA_1090_chromosome_<>Neisseria_meningitidis_MC58_chromosome_<>Neisseria_meningitidis_Z2491_chromosome_<>Neisseria_meningitidis_FAM18_chromosome_<>Neisseria_meningitidis_053442_chromosome_<>Neisseria_meningitidis_alpha14_chromosome_	RNA	-	1		Candidate_771_NC_011035(para)	-	-	-	-Multi_Fur(19.02|-204)E.coli_sig70_1(7.36|-208)E.coli_sig70_1(11.11|-194)E.coli_sig70_2(8.49|-205)E.coli_sig70_3(7.53|-205)
Candidate_480_NC_011035	|	NGK_2241		FolD	*	>>>	1	|	1862015	1862091	>>>	76	|	-17	<<<	NGK_2242	Integral_membrane_protein	*	candidate	278	7.5e-06	T	6	Neisseria_gonorrhoeae_FA_1090_chromosome_<>Neisseria_meningitidis_MC58_chromosome_<>Neisseria_meningitidis_Z2491_chromosome_<>Neisseria_meningitidis_FAM18_chromosome_<>Neisseria_meningitidis_053442_chromosome_<>Neisseria_meningitidis_alpha14_chromosome_	-	-	1		Candidate_771_NC_011035(para)	-	-	-	-
Candidate_481_NC_011035	|	NGK_2243		aspartate-semialdehyde_dehydrogenase	*	>>>	1	|	1863948	1864019	>>>	71	|	19	<<<	NGK_2244	hypothetical_protein	*	candidate	300	2e-07	T	6	Neisseria_gonorrhoeae_FA_1090_chromosome_<>Neisseria_meningitidis_MC58_chromosome_<>Neisseria_meningitidis_Z2491_chromosome_<>Neisseria_meningitidis_FAM18_chromosome_<>Neisseria_meningitidis_053442_chromosome_<>Neisseria_meningitidis_alpha14_chromosome_	RNA	-	7		Candidate_281_NC_011035(para),Candidate_282_NC_011035(para),Candidate_131_NC_011035(para),Candidate_514_NC_011035(para),Candidate_688_NC_011035(para),Candidate_83_NC_011035(para),Candidate_429_NC_011035(para)	-	-	-	-
Candidate_482_NC_011035	|	NGK_2246		putative_exodeoxyribonuclease	*	<<<	31	|	1865721	1865859	<<<	138	|	0	<<<	NGK_2247	CysS	*	candidate	850	3.9e-32	T	1	Neisseria_gonorrhoeae_FA_1090_chromosome_	RNA	-	0	-	-	-	-	-	-
Candidate_483_NC_011035	|	NGK_2260		Adhesin_component	*	>>>	9	|	1876378	1876554	<<<	176	|	0	<<<	NGK_2261	malate:quinone_oxidoreductase	*	candidate	870	4.5e-33	B	6	Neisseria_gonorrhoeae_FA_1090_chromosome_<>Neisseria_meningitidis_MC58_chromosome_<>Neisseria_meningitidis_Z2491_chromosome_<>Neisseria_meningitidis_FAM18_chromosome_<>Neisseria_meningitidis_053442_chromosome_<>Neisseria_meningitidis_alpha14_chromosome_	RNA	-	0		Candidate_484_NC_011035(anti)	-	-	-	-
Candidate_485_NC_011035	|	NGK_2268		elongation_factor_Ts	*	>>>	1	|	1881834	1881914	>>>	80	|	134	>>>	NGK_2269	uridylate_kinase	*	candidate	957	4.5e-37	T	6	Neisseria_gonorrhoeae_FA_1090_chromosome_<>Neisseria_meningitidis_MC58_chromosome_<>Neisseria_meningitidis_Z2491_chromosome_<>Neisseria_meningitidis_FAM18_chromosome_<>Neisseria_meningitidis_053442_chromosome_<>Neisseria_meningitidis_alpha14_chromosome_	RNA	-	0	-	-	-	-	-	-
Candidate_486_NC_011035	|	NGK_2269		uridylate_kinase	*	>>>	6	|	1882775	1882949	>>>	174	|	9	>>>	NGK_2270	adhesin_MafA	*	candidate	93	0.0048	T	6	Neisseria_gonorrhoeae_FA_1090_chromosome_<>Neisseria_meningitidis_MC58_chromosome_<>Neisseria_meningitidis_Z2491_chromosome_<>Neisseria_meningitidis_FAM18_chromosome_<>Neisseria_meningitidis_053442_chromosome_<>Neisseria_meningitidis_alpha14_chromosome_	RNA	-	26		Candidate_193_NC_011035(para),Candidate_356_NC_011035(para),Candidate_280_NC_011035(para),Candidate_789_NC_011035(para),Candidate_316_NC_011035(para),Candidate_325_NC_011035(para),Candidate_281_NC_011035(para),Candidate_420_NC_011035(para),Candidate_546_NC_011035(para),Candidate_741_NC_011035(para),Candidate_650_NC_011035(para),Candidate_362_NC_011035(para),Candidate_590_NC_011035(para),Candidate…	-	5	RS	-
Candidate_487_NC_011035	|	NGK_2269		uridylate_kinase	*	>>>	6	|	1882775	1882931	>>>	156	|	27	>>>	NGK_2270	adhesin_MafA	*	candidate	93	0.0048	T	6	Neisseria_gonorrhoeae_FA_1090_chromosome_<>Neisseria_meningitidis_MC58_chromosome_<>Neisseria_meningitidis_Z2491_chromosome_<>Neisseria_meningitidis_FAM18_chromosome_<>Neisseria_meningitidis_053442_chromosome_<>Neisseria_meningitidis_alpha14_chromosome_	RNA	-	27		Candidate_193_NC_011035(para),Candidate_356_NC_011035(para),Candidate_280_NC_011035(para),Candidate_789_NC_011035(para),Candidate_316_NC_011035(para),Candidate_325_NC_011035(para),Candidate_281_NC_011035(para),Candidate_420_NC_011035(para),Candidate_546_NC_011035(para),Candidate_741_NC_011035(para),Candidate_650_NC_011035(para),Candidate_362_NC_011035(para),Candidate_590_NC_011035(para),Candidate…	-	5	RS	-
Candidate_488_NC_011035	|	NGK_2284		argininosuccinate_synthase	*	>>>	2	|	1895042	1895122	>>>	80	|	119	>>>	NGK_2285	hypothetical_protein	*	candidate	121	0.00044	T	5	Neisseria_gonorrhoeae_FA_1090_chromosome_<>Neisseria_meningitidis_Z2491_chromosome_<>Neisseria_meningitidis_FAM18_chromosome_<>Neisseria_meningitidis_053442_chromosome_<>Neisseria_meningitidis_alpha14_chromosome_	RNA	-	4		Candidate_489_NC_011035(tandem),Candidate_347_NC_011035(para),Candidate_251_NC_011035(para),Candidate_323_NC_011035(para)	-	-	-	-
Candidate_489_NC_011035	|	NGK_2284		argininosuccinate_synthase	*	>>>	56	|	1895096	1895206	>>>	110	|	35	>>>	NGK_2285	hypothetical_protein	*	candidate	121	6.7e-06	T	6	Neisseria_gonorrhoeae_FA_1090_chromosome_<>Neisseria_meningitidis_MC58_chromosome_<>Neisseria_meningitidis_Z2491_chromosome_<>Neisseria_meningitidis_FAM18_chromosome_<>Neisseria_meningitidis_053442_chromosome_<>Neisseria_meningitidis_alpha14_chromosome_	RNA	-	7		Candidate_488_NC_011035(tandem),Candidate_347_NC_011035(para),Candidate_251_NC_011035(para),Candidate_323_NC_011035(para),Candidate_247_NC_011035(para),Candidate_362_NC_011035(para),Candidate_739_NC_011035(para)	-	5	RS	-
Candidate_490_NC_011035	|	NGK_2294		Periplasmic_protein	*	>>>	-5	|	1905268	1905796	<<<	528	|	0	<<<	NGK_2295	BirA-related_protein	*	candidate	135	0.0037	T	6	Neisseria_gonorrhoeae_FA_1090_chromosome_<>Neisseria_meningitidis_MC58_chromosome_<>Neisseria_meningitidis_Z2491_chromosome_<>Neisseria_meningitidis_FAM18_chromosome_<>Neisseria_meningitidis_053442_chromosome_<>Neisseria_meningitidis_alpha14_chromosome_	RNA	-	1		Candidate_771_NC_011035(para)	-	-	-	-E.coli_sig70_3(7.10|-327)
Candidate_491_NC_011035	|	NGK_2294		Periplasmic_protein	*	>>>	245	|	1905518	1905796	<<<	278	|	0	<<<	NGK_2295	BirA-related_protein	*	candidate	135	0.0037	T	6	Neisseria_gonorrhoeae_FA_1090_chromosome_<>Neisseria_meningitidis_MC58_chromosome_<>Neisseria_meningitidis_Z2491_chromosome_<>Neisseria_meningitidis_FAM18_chromosome_<>Neisseria_meningitidis_053442_chromosome_<>Neisseria_meningitidis_alpha14_chromosome_	RNA	-	46		Candidate_493_NC_011035(anti),Candidate_407_NC_011035(para),Candidate_676_NC_011035(para),Candidate_693_NC_011035(para),Candidate_702_NC_011035(para),Candidate_551_NC_011035(para),Candidate_552_NC_011035(para),Candidate_711_NC_011035(para),Candidate_703_NC_011035(para),Candidate_622_NC_011035(para),Candidate_623_NC_011035(para),Candidate_464_NC_011035(para),Candidate_478_NC_011035(para),Candidate…	-	-	-	-E.coli_sig70_3(7.10|-77)
Candidate_492_NC_011035	|	NGK_2294		Periplasmic_protein	*	>>>	281	|	1905554	1905796	<<<	242	|	0	<<<	NGK_2295	BirA-related_protein	*	candidate	135	0.0037	T	6	Neisseria_gonorrhoeae_FA_1090_chromosome_<>Neisseria_meningitidis_MC58_chromosome_<>Neisseria_meningitidis_Z2491_chromosome_<>Neisseria_meningitidis_FAM18_chromosome_<>Neisseria_meningitidis_053442_chromosome_<>Neisseria_meningitidis_alpha14_chromosome_	RNA	-	47		Candidate_493_NC_011035(anti),Candidate_407_NC_011035(para),Candidate_676_NC_011035(para),Candidate_693_NC_011035(para),Candidate_702_NC_011035(para),Candidate_551_NC_011035(para),Candidate_552_NC_011035(para),Candidate_711_NC_011035(para),Candidate_703_NC_011035(para),Candidate_622_NC_011035(para),Candidate_623_NC_011035(para),Candidate_464_NC_011035(para),Candidate_478_NC_011035(para),Candidate…	-	-	-	-E.coli_sig70_3(7.10|-41)
Candidate_493_NC_011035	|	NGK_2294		Periplasmic_protein	*	>>>	41	|	1905314	1905782	>>>	468	|	14	<<<	NGK_2295	BirA-related_protein	*	candidate	135	0.0037	T	6	Neisseria_gonorrhoeae_FA_1090_chromosome_<>Neisseria_meningitidis_MC58_chromosome_<>Neisseria_meningitidis_Z2491_chromosome_<>Neisseria_meningitidis_FAM18_chromosome_<>Neisseria_meningitidis_053442_chromosome_<>Neisseria_meningitidis_alpha14_chromosome_	RNA	-	35		Candidate_491_NC_011035(anti),Candidate_492_NC_011035(anti),Candidate_407_NC_011035(para),Candidate_676_NC_011035(para),Candidate_693_NC_011035(para),Candidate_702_NC_011035(para),Candidate_551_NC_011035(para),Candidate_552_NC_011035(para),Candidate_711_NC_011035(para),Candidate_703_NC_011035(para),Candidate_622_NC_011035(para),Candidate_623_NC_011035(para),Candidate_464_NC_011035(para),Candidate…	-	-	-	-E.coli_sig70_3(8.61|-249)
Candidate_494_NC_011035	|	NGK_2294		Periplasmic_protein	*	>>>	41	|	1905314	1905761	>>>	447	|	35	<<<	NGK_2295	BirA-related_protein	*	candidate	135	0.0037	T	6	Neisseria_gonorrhoeae_FA_1090_chromosome_<>Neisseria_meningitidis_MC58_chromosome_<>Neisseria_meningitidis_Z2491_chromosome_<>Neisseria_meningitidis_FAM18_chromosome_<>Neisseria_meningitidis_053442_chromosome_<>Neisseria_meningitidis_alpha14_chromosome_	RNA	-	35		Candidate_491_NC_011035(anti),Candidate_492_NC_011035(anti),Candidate_407_NC_011035(para),Candidate_676_NC_011035(para),Candidate_693_NC_011035(para),Candidate_702_NC_011035(para),Candidate_551_NC_011035(para),Candidate_552_NC_011035(para),Candidate_711_NC_011035(para),Candidate_703_NC_011035(para),Candidate_622_NC_011035(para),Candidate_623_NC_011035(para),Candidate_464_NC_011035(para),Candidate…	-	-	-	-E.coli_sig70_3(8.61|-228)
Candidate_495_NC_011035	|	NGK_2304		Periplasmic_protein	*	>>>	1	|	1911552	1911624	>>>	72	|	19	>>>	NGK_2305	hypothetical_protein	*	candidate	417	2.1e-12	T	6	Neisseria_gonorrhoeae_FA_1090_chromosome_<>Neisseria_meningitidis_MC58_chromosome_<>Neisseria_meningitidis_Z2491_chromosome_<>Neisseria_meningitidis_FAM18_chromosome_<>Neisseria_meningitidis_053442_chromosome_<>Neisseria_meningitidis_alpha14_chromosome_	-	-	0	-	-	-	5	-	-E.coli_sig70_3(8.33|-34)
Candidate_496_NC_011035	|	NGK_2309		Lipoprotein	*	>>>	38	|	1914751	1914858	<<<	107	|	5	<<<	NGK_2310	hypothetical_protein	*	candidate	230	0.00039	T	6	Neisseria_gonorrhoeae_FA_1090_chromosome_<>Neisseria_meningitidis_MC58_chromosome_<>Neisseria_meningitidis_Z2491_chromosome_<>Neisseria_meningitidis_FAM18_chromosome_<>Neisseria_meningitidis_053442_chromosome_<>Neisseria_meningitidis_alpha14_chromosome_	RNA	-	0		Candidate_497_NC_011035(anti)	-	-	-	-
Candidate_497_NC_011035	|	NGK_2309		Lipoprotein	*	>>>	1	|	1914714	1914841	>>>	127	|	22	<<<	NGK_2310	hypothetical_protein	*	candidate	230	0.00039	T	6	Neisseria_gonorrhoeae_FA_1090_chromosome_<>Neisseria_meningitidis_MC58_chromosome_<>Neisseria_meningitidis_Z2491_chromosome_<>Neisseria_meningitidis_FAM18_chromosome_<>Neisseria_meningitidis_053442_chromosome_<>Neisseria_meningitidis_alpha14_chromosome_	RNA	-	0		Candidate_496_NC_011035(anti)	-	-	-	-
Candidate_498_NC_011035	|	NGK_2332		Cell_division_protein_ftsX-like_protein	*	>>>	1	|	1933453	1933526	>>>	73	|	17	>>>	NGK_2333	BolA/YrbA_family_protein	*	candidate	400	1.5e-11	T	6	Neisseria_gonorrhoeae_FA_1090_chromosome_<>Neisseria_meningitidis_MC58_chromosome_<>Neisseria_meningitidis_Z2491_chromosome_<>Neisseria_meningitidis_FAM18_chromosome_<>Neisseria_meningitidis_053442_chromosome_<>Neisseria_meningitidis_alpha14_chromosome_	RNA	-	2		Candidate_76_NC_011035(anti),Candidate_621_NC_011035(para),Candidate_791_NC_011035(para)	-	5	RS	-
Candidate_499_NC_011035	|	NGK_2333		BolA/YrbA_family_protein	*	>>>	2	|	1933795	1933875	>>>	80	|	-32	<<<	NGK_2334	phosphoglycerate_kinase	*	candidate	250	0.00013	T	2	Neisseria_gonorrhoeae_FA_1090_chromosome_<>Neisseria_meningitidis_MC58_chromosome_	-	-	1		Candidate_771_NC_011035(para)	-	-	-	-
Candidate_500_NC_011035	|	NGK_2352		putative_pyrroline-5-carboxylate_reductase	*	>>>	1	|	1953321	1953463	>>>	142	|	4	>>>	NGK_2353	DskA	*	candidate	674	4.1e-24	T	6	Neisseria_gonorrhoeae_FA_1090_chromosome_<>Neisseria_meningitidis_MC58_chromosome_<>Neisseria_meningitidis_Z2491_chromosome_<>Neisseria_meningitidis_FAM18_chromosome_<>Neisseria_meningitidis_053442_chromosome_<>Neisseria_meningitidis_alpha14_chromosome_	-	-	0	-	-	-	5	-	-
Candidate_501_NC_011035	|	NGK_2354		hypothetical_protein	*	>>>	711	|	1954943	1955274	<<<	331	|	706	>>>	NGK_trnaIle4	tRNA-Ile	*	candidate	351	5.1e-07	T	3	Haloarcula_marismortui_ATCC_43049_chromosome_I<>Desulfotomaculum_reducens_MI-1_chromosome_<>Corynebacterium_aurimucosum_ATCC_700975_chromosome_	-	-	4		Candidate_75_NC_011035(tandem),Candidate_34_NC_011035(para),Candidate_48_NC_011035(para),Candidate_51_NC_011035(para)	-	-	-	-
Candidate_502_NC_011035	|	NGK_trnaAla5		tRNA-Ala	*	>>>	155	|	1956294	1956475	<<<	181	|	3346	<<<	NGK_2355	hypothetical_protein	*	candidate	1247	4.5e-49	T	7	Neisseria_gonorrhoeae_FA_1090_chromosome_<>Neisseria_meningitidis_MC58_chromosome_<>Neisseria_meningitidis_Z2491_chromosome_<>Staphylococcus_haemolyticus_JCSC1435_chromosome_<>Neisseria_meningitidis_FAM18_chromosome_<>Neisseria_meningitidis_053442_chromosome_<>Neisseria_meningitidis_alpha14_chromosome_	RNA	-	5		Candidate_74_NC_011035(tandem),Candidate_504_NC_011035(opp),Candidate_679_NC_011035(tandem),Candidate_680_NC_011035(opp),Candidate_33_NC_011035(para),Candidate_595_NC_011035(para),Candidate_47_NC_011035(para),Candidate_50_NC_011035(para)	-	-	-	-
Candidate_503_NC_011035	|	NGK_trnaAla5		tRNA-Ala	*	>>>	177	|	1956316	1956475	<<<	159	|	3346	<<<	NGK_2355	hypothetical_protein	*	candidate	1247	4.5e-49	T	9	Neisseria_gonorrhoeae_FA_1090_chromosome_<>Neisseria_meningitidis_MC58_chromosome_<>Neisseria_meningitidis_Z2491_chromosome_<>Ehrlichia_ruminantium_str._Welgevonden_chromosome_<>Staphylococcus_haemolyticus_JCSC1435_chromosome_<>Neisseria_meningitidis_FAM18_chromosome_<>Neisseria_meningitidis_053442_chromosome_<>Bartonella_tribocorum_CIP_105476_chromosome_<>Neisseria_meningitidis_alpha14_chromosom…	RNA	-	5		Candidate_74_NC_011035(tandem),Candidate_504_NC_011035(opp),Candidate_679_NC_011035(tandem),Candidate_680_NC_011035(opp),Candidate_33_NC_011035(para),Candidate_595_NC_011035(para),Candidate_47_NC_011035(para),Candidate_50_NC_011035(para)	-	-	-	-
Candidate_505_NC_011035	|	NGK_trnaAla5		tRNA-Ala	*	>>>	3450	|	1959589	1959642	>>>	53	|	179	<<<	NGK_2355	hypothetical_protein	*	candidate	242	0.0047	B	18	Methanocaldococcus_jannaschii_DSM_2661_chromosome_<>Treponema_pallidum_subsp._pallidum_str._Nichols_chromosome_<>Neisseria_gonorrhoeae_FA_1090_chromosome_<>Neisseria_meningitidis_MC58_chromosome_<>Methanosarcina_mazei_Go1_chromosome_<>Magnetospirillum_magneticum_AMB-1_chromosome_<>Shewanella_sp._MR-4_chromosome_<>Coxiella_burnetii_Dugway_5J108-111_chromosome_<>Neisseria_meningitidis_053442_chromo…	RNA	-	5	W	Candidate_74_NC_011035(opp),Candidate_502_NC_011035(opp),Candidate_503_NC_011035(opp),Candidate_679_NC_011035(anti),Candidate_33_NC_011035(para),Candidate_595_NC_011035(para),Candidate_47_NC_011035(para),Candidate_50_NC_011035(para)	-	-	-	-
Candidate_506_NC_011035	|	NGK_2359		Integral_membrane_protein	*	>>>	1	|	1964563	1964630	>>>	67	|	-26	<<<	NGK_2360	dTDP-6-deoxy-L-mannose-dehydrogenase	*	candidate	215	0.0024	T	1	Neisseria_gonorrhoeae_FA_1090_chromosome_	-	-	1		Candidate_771_NC_011035(para)	-	-	-	-
Candidate_507_NC_011035	|	NGK_2370		GltS	*	>>>	1	|	1975705	1975788	>>>	83	|	13	>>>	NGK_2371	Lipoprotein	*	candidate	472	8.1e-15	T	6	Neisseria_gonorrhoeae_FA_1090_chromosome_<>Neisseria_meningitidis_MC58_chromosome_<>Neisseria_meningitidis_Z2491_chromosome_<>Neisseria_meningitidis_FAM18_chromosome_<>Neisseria_meningitidis_053442_chromosome_<>Neisseria_meningitidis_alpha14_chromosome_	RNA	-	0	-	-	-	5	-	-
Candidate_508_NC_011035	|	NGK_2374		hypothetical_protein	*	>>>	12	|	1977809	1977892	>>>	83	|	-14	<<<	NGK_2375	putative_outer_membrane_protein	*	candidate	250	2e-05	T	4	Neisseria_gonorrhoeae_FA_1090_chromosome_<>Neisseria_meningitidis_MC58_chromosome_<>Neisseria_meningitidis_Z2491_chromosome_<>Neisseria_meningitidis_FAM18_chromosome_	-	-	1		Candidate_771_NC_011035(para)	-	-	-	-E.coli_sig70_1(9.00|-114)E.coli_sig70_3(7.91|-112)
Candidate_509_NC_011035	|	NGK_2376		GTPase_or_GTP-binding-conserved_crenarchaeal_prote	*	>>>	-2	|	1979296	1979464	<<<	168	|	0	<<<	NGK_2378	PykA	*	candidate	723	1.2e-26	T	4	Neisseria_gonorrhoeae_FA_1090_chromosome_<>Neisseria_meningitidis_MC58_chromosome_<>Neisseria_meningitidis_Z2491_chromosome_<>Neisseria_meningitidis_FAM18_chromosome_	-	-	1		Candidate_771_NC_011035(para)	-	-	-	-
Candidate_510_NC_011035	|	NGK_2376		GTPase_or_GTP-binding-conserved_crenarchaeal_prote	*	>>>	1	|	1979299	1979489	>>>	190	|	-25	<<<	NGK_2378	PykA	*	candidate	723	1.2e-26	T	4	Neisseria_gonorrhoeae_FA_1090_chromosome_<>Neisseria_meningitidis_MC58_chromosome_<>Neisseria_meningitidis_Z2491_chromosome_<>Neisseria_meningitidis_FAM18_chromosome_	RNA	-	1		Candidate_771_NC_011035(para)	-	-	-	-
Candidate_511_NC_011035	|	NGK_2381		hypothetical_protein	*	>>>	1100	|	1983024	1983313	>>>	289	|	815	>>>	NGK_2382	putative_secretion_protein	*	candidate	1416	6.4e-58	T	1	Neisseria_meningitidis_MC58_chromosome_	RNA	-	1		Candidate_72_NC_011035(opp)	-	-	-	-
Candidate_512_NC_011035	|	NGK_2388		Bacteriocin_resistance_protein,_putative	*	<<<	313	|	1990275	1990326	<<<	51	|	451	<<<	NGK_2389	PhnO-related_protein	*	candidate	218	0.0042	T	11	Haemophilus_influenzae_Rd_KW20_chromosome_<>Neisseria_gonorrhoeae_FA_1090_chromosome_<>Neisseria_meningitidis_MC58_chromosome_<>Neisseria_meningitidis_Z2491_chromosome_<>Trichodesmium_erythraeum_IMS101_chromosome_<>Neisseria_meningitidis_FAM18_chromosome_<>Rickettsia_canadensis_str._McKiel_chromosome_<>Neisseria_meningitidis_053442_chromosome_<>Nostoc_punctiforme_PCC_73102_chromosome_<>Photorhabd…	RNA	-	13		Candidate_685_NC_011035(anti),Candidate_603_NC_011035(para),Candidate_703_NC_011035(para),Candidate_153_NC_011035(para),Candidate_464_NC_011035(para),Candidate_676_NC_011035(para),Candidate_491_NC_011035(para),Candidate_492_NC_011035(para),Candidate_493_NC_011035(para),Candidate_245_NC_011035(para),Candidate_733_NC_011035(para),Candidate_15_NC_011035(para),Candidate_789_NC_011035(para),Candidate_…	-	-	-	-E.coli_sig70_3(9.21|-57)
Candidate_513_NC_011035	|	NGK_2391		aspartate_carbamoyltransferase_regulatory_subunit	*	>>>	1	|	1993245	1993311	>>>	66	|	259	>>>	NGK_2392	hypothetical_protein	*	candidate	242	0.00028	T	2	Neisseria_gonorrhoeae_FA_1090_chromosome_<>Neisseria_meningitidis_053442_chromosome_	-	-	0	-	-	-	-	-	-
Candidate_515_NC_011035	|	NGK_2412		hypothetical_protein	*	>>>	1	|	2009143	2009217	>>>	74	|	6	>>>	NGK_2413	putative_DNA_methylase	*	candidate	374	2.4e-10	T	6	Neisseria_gonorrhoeae_FA_1090_chromosome_<>Neisseria_meningitidis_MC58_chromosome_<>Neisseria_meningitidis_Z2491_chromosome_<>Neisseria_meningitidis_FAM18_chromosome_<>Neisseria_meningitidis_053442_chromosome_<>Neisseria_meningitidis_alpha14_chromosome_	RNA	-	2		Candidate_477_NC_011035(para),Candidate_660_NC_011035(para)	-	5	RS	-
Candidate_516_NC_011035	|	NGK_2417		50S_ribosomal_protein_L1	*	>>>	3	|	2014021	2014095	>>>	74	|	338	>>>	NGK_2418	50S_ribosomal_protein_L10	*	candidate	1043	5.6e-41	T	6	Neisseria_gonorrhoeae_FA_1090_chromosome_<>Neisseria_meningitidis_MC58_chromosome_<>Neisseria_meningitidis_Z2491_chromosome_<>Neisseria_meningitidis_FAM18_chromosome_<>Neisseria_meningitidis_053442_chromosome_<>Neisseria_meningitidis_alpha14_chromosome_	RNA	-	0	-	-	-	-	-	-
Candidate_517_NC_011035	|	NGK_2419		50S_ribosomal_protein_L7/L12	*	>>>	1	|	2015176	2015241	>>>	65	|	123	>>>	NGK_2420	DNA-directed_RNA_polymerase_subunit_beta	*	candidate	908	8.5e-35	B	6	Neisseria_gonorrhoeae_FA_1090_chromosome_<>Neisseria_meningitidis_MC58_chromosome_<>Neisseria_meningitidis_Z2491_chromosome_<>Neisseria_meningitidis_FAM18_chromosome_<>Neisseria_meningitidis_053442_chromosome_<>Neisseria_meningitidis_alpha14_chromosome_	RNA	-	0	-	-	-	-	-	-
Candidate_518_NC_011035	|	NGK_2421		DNA-directed_RNA_polymerase_subunit_beta_	*	>>>	1	|	2023873	2023945	>>>	72	|	310	>>>	NGK_2422	hypothetical_protein	*	candidate	474	2.2e-15	B	6	Neisseria_gonorrhoeae_FA_1090_chromosome_<>Neisseria_meningitidis_MC58_chromosome_<>Neisseria_meningitidis_Z2491_chromosome_<>Neisseria_meningitidis_FAM18_chromosome_<>Neisseria_meningitidis_053442_chromosome_<>Neisseria_meningitidis_alpha14_chromosome_	RNA	-	0		Candidate_689_NC_011035(anti)	-	-	-	-
Candidate_520_NC_011035	|	NGK_2427		hypothetical_protein	*	>>>	44	|	2026804	2026939	>>>	135	|	16	>>>	NGK_2428	30S_ribosomal_protein_S12	*	candidate	526	1.1e-17	T	6	Neisseria_gonorrhoeae_FA_1090_chromosome_<>Neisseria_meningitidis_MC58_chromosome_<>Neisseria_meningitidis_Z2491_chromosome_<>Neisseria_meningitidis_FAM18_chromosome_<>Neisseria_meningitidis_053442_chromosome_<>Neisseria_meningitidis_alpha14_chromosome_	RNA	-	0	-	-	-	5	-	-E.coli_sig70_3(10.85|-56)
Candidate_522_NC_011035	|	NGK_2444		30S_ribosomal_protein_S17	*	>>>	1	|	2037002	2037128	>>>	126	|	213	>>>	NGK_2445	50S_ribosomal_protein_L14	*	candidate	1091	3.9e-43	T	6	Neisseria_gonorrhoeae_FA_1090_chromosome_<>Neisseria_meningitidis_MC58_chromosome_<>Neisseria_meningitidis_Z2491_chromosome_<>Neisseria_meningitidis_FAM18_chromosome_<>Neisseria_meningitidis_053442_chromosome_<>Neisseria_meningitidis_alpha14_chromosome_	RNA	-	0	-	-	-	-	-	-
Candidate_524_NC_011035	|	NGK_2458		OxyR	*	>>>	500	|	2049217	2049365	>>>	148	|	-15	<<<	NGK_2459	outer_membrane_protein_I_precursor	*	candidate	247	0.00011	T	7	Methanosarcina_mazei_Go1_chromosome_<>Xylella_fastidiosa_Temecula1_chromosome_<>Burkholderia_pseudomallei_K96243_chromosome_1<>Burkholderia_pseudomallei_1710b_chromosome_I<>Burkholderia_pseudomallei_1106a_chromosome_I<>Yersinia_pestis_Angola_chromosome_<>Vibrio_splendidus_LGP32_chromosome_1	-	-	1		Candidate_771_NC_011035(para)	-	-	-	-
Candidate_525_NC_011035	|	NGK_2458		OxyR	*	>>>	500	|	2049217	2049347	>>>	130	|	3	<<<	NGK_2459	outer_membrane_protein_I_precursor	*	candidate	247	0.00011	B	7	Methanosarcina_mazei_Go1_chromosome_<>Xylella_fastidiosa_Temecula1_chromosome_<>Burkholderia_pseudomallei_K96243_chromosome_1<>Burkholderia_pseudomallei_1710b_chromosome_I<>Burkholderia_pseudomallei_1106a_chromosome_I<>Yersinia_pestis_Angola_chromosome_<>Vibrio_splendidus_LGP32_chromosome_1	-	-	1		Candidate_523_NC_011035(tandem),Candidate_691_NC_011035(opp)	-	-	-	-
Candidate_526_NC_011035	|	NGK_2482		Integral_membrane_protein	*	>>>	4	|	2074284	2074369	>>>	85	|	4	>>>	NGK_2483	16S_rRNA_methyltransferase_GidB	*	candidate	436	3.5e-13	T	6	Neisseria_gonorrhoeae_FA_1090_chromosome_<>Neisseria_meningitidis_MC58_chromosome_<>Neisseria_meningitidis_Z2491_chromosome_<>Neisseria_meningitidis_FAM18_chromosome_<>Neisseria_meningitidis_053442_chromosome_<>Neisseria_meningitidis_alpha14_chromosome_	RNA	-	16		Candidate_446_NC_011035(para),Candidate_447_NC_011035(para),Candidate_316_NC_011035(para),Candidate_317_NC_011035(para),Candidate_220_NC_011035(para),Candidate_133_NC_011035(para),Candidate_134_NC_011035(para),Candidate_298_NC_011035(para),Candidate_155_NC_011035(para),Candidate_156_NC_011035(para),Candidate_537_NC_011035(para),Candidate_209_NC_011035(para),Candidate_458_NC_011035(para),Candidate…	-	5	RS	-
Candidate_527_NC_011035	|	NGK_2484		putative_parA_family_protein_-_putative_ATPase	*	>>>	1	|	2075872	2076306	>>>	434	|	309	<<<	NGK_2485	ribonuclease_HII	*	candidate	120	0.0049	T	6	Neisseria_gonorrhoeae_FA_1090_chromosome_<>Neisseria_meningitidis_MC58_chromosome_<>Neisseria_meningitidis_Z2491_chromosome_<>Neisseria_meningitidis_FAM18_chromosome_<>Neisseria_meningitidis_053442_chromosome_<>Neisseria_meningitidis_alpha14_chromosome_	RNA	-	43		Candidate_70_NC_011035(opp),Candidate_696_NC_011035(tandem),Candidate_407_NC_011035(para),Candidate_703_NC_011035(para),Candidate_603_NC_011035(para),Candidate_464_NC_011035(para),Candidate_622_NC_011035(para),Candidate_623_NC_011035(para),Candidate_676_NC_011035(para),Candidate_693_NC_011035(para),Candidate_478_NC_011035(para),Candidate_672_NC_011035(para),Candidate_3_NC_011035(para),Candidate_6…	-	-	-	-
Candidate_528_NC_011035	|	NGK_2488		PdxA	*	>>>	2	|	2081917	2082154	>>>	237	|	-11	<<<	NGK_2489	Rne	*	candidate	109	0.0046	T	7	Neisseria_gonorrhoeae_FA_1090_chromosome_<>Neisseria_meningitidis_MC58_chromosome_<>Neisseria_meningitidis_Z2491_chromosome_<>Neisseria_meningitidis_FAM18_chromosome_<>Sphingomonas_wittichii_RW1_chromosome_<>Neisseria_meningitidis_053442_chromosome_<>Neisseria_meningitidis_alpha14_chromosome_	RNA	-	1		Candidate_771_NC_011035(para)	-	-	-	-
Candidate_529_NC_011035	|	NGK_2491		RluC	*	>>>	1	|	2086390	2086491	>>>	101	|	47	>>>	NGK_2492	lipid-A-disaccharide_synthase	*	candidate	84	0.0048	T	6	Neisseria_gonorrhoeae_FA_1090_chromosome_<>Neisseria_meningitidis_MC58_chromosome_<>Neisseria_meningitidis_Z2491_chromosome_<>Neisseria_meningitidis_FAM18_chromosome_<>Neisseria_meningitidis_053442_chromosome_<>Neisseria_meningitidis_alpha14_chromosome_	RNA	-	48		Candidate_699_NC_011035(tandem),Candidate_650_NC_011035(para),Candidate_362_NC_011035(para),Candidate_590_NC_011035(para),Candidate_733_NC_011035(para),Candidate_713_NC_011035(para),Candidate_710_NC_011035(para),Candidate_281_NC_011035(para),Candidate_282_NC_011035(para),Candidate_726_NC_011035(para),Candidate_316_NC_011035(para),Candidate_153_NC_011035(para),Candidate_661_NC_011035(para),Candida…	-	5	RS	-
Candidate_530_NC_011035	|	NGK_2492		lipid-A-disaccharide_synthase	*	>>>	568	|	2088280	2088373	>>>	93	|	-23	<<<	NGK_2493	dihydrodipicolinate_reductase	*	candidate	351	3.2e-09	T	4	Neisseria_meningitidis_MC58_chromosome_<>Neisseria_meningitidis_Z2491_chromosome_<>Neisseria_meningitidis_FAM18_chromosome_<>Neisseria_meningitidis_alpha14_chromosome_	RNA	-	1		Candidate_771_NC_011035(para)	-	-	-	-
Candidate_531_NC_011035	|	NGK_2495		Fur	*	>>>	1	|	2090210	2090296	>>>	86	|	-19	>>>	NGK_2496	leucyl/phenylalanyl-tRNA--protein_transferase	*	candidate	327	4.1e-08	T	6	Neisseria_gonorrhoeae_FA_1090_chromosome_<>Neisseria_meningitidis_MC58_chromosome_<>Neisseria_meningitidis_Z2491_chromosome_<>Neisseria_meningitidis_FAM18_chromosome_<>Neisseria_meningitidis_053442_chromosome_<>Neisseria_meningitidis_alpha14_chromosome_	-	-	1		Candidate_771_NC_011035(para)	-	5	-	-
Candidate_532_NC_011035	|	NGK_2498		glyceraldehyde-3-phosphate_dehydrogenase	*	<<<	82	|	2092372	2092487	<<<	115	|	0	<<<	NGK_2499	putative_ferredoxin	*	candidate	917	3.2e-35	T	6	Neisseria_gonorrhoeae_FA_1090_chromosome_<>Neisseria_meningitidis_MC58_chromosome_<>Neisseria_meningitidis_Z2491_chromosome_<>Neisseria_meningitidis_FAM18_chromosome_<>Neisseria_meningitidis_053442_chromosome_<>Neisseria_meningitidis_alpha14_chromosome_	-	-	4		Candidate_412_NC_011035(para),Candidate_131_NC_011035(para),Candidate_393_NC_011035(para),Candidate_399_NC_011035(para)	-	-	-	-
Candidate_533_NC_011035	|	NGK_trnaAsp2		tRNA-Asp	*	>>>	1	|	2095929	2096003	>>>	74	|	61	>>>	NGK_2501	NlaIII_methyltransferase	*	candidate	639	1.2e-22	T	4	Neisseria_gonorrhoeae_FA_1090_chromosome_<>Neisseria_meningitidis_MC58_chromosome_<>Neisseria_meningitidis_FAM18_chromosome_<>Neisseria_meningitidis_alpha14_chromosome_	RNA	-	0		Candidate_69_NC_011035(anti)	-	5	-	-
Candidate_535_NC_011035	|	NGK_2506		PrlC	*	>>>	449	|	2104254	2104404	>>>	150	|	-20	<<<	NGK_2507	CcpR	*	candidate	117	0.0021	T	5	Neisseria_meningitidis_MC58_chromosome_<>Neisseria_meningitidis_Z2491_chromosome_<>Neisseria_meningitidis_FAM18_chromosome_<>Neisseria_meningitidis_053442_chromosome_<>Neisseria_meningitidis_alpha14_chromosome_	-	-	1		Candidate_771_NC_011035(para)	-	-	-	-
Candidate_536_NC_011035	|	NGK_2521		dihydroorotate_dehydrogenase_2	*	>>>	1	|	2115946	2116037	>>>	91	|	103	>>>	NGK_2522	hypothetical_protein	*	candidate	259	9.9e-06	T	4	Neisseria_gonorrhoeae_FA_1090_chromosome_<>Neisseria_meningitidis_MC58_chromosome_<>Neisseria_meningitidis_Z2491_chromosome_<>Neisseria_meningitidis_FAM18_chromosome_	RNA	-	13		Candidate_420_NC_011035(para),Candidate_155_NC_011035(para),Candidate_156_NC_011035(para),Candidate_339_NC_011035(para),Candidate_340_NC_011035(para),Candidate_133_NC_011035(para),Candidate_134_NC_011035(para),Candidate_269_NC_011035(para),Candidate_446_NC_011035(para),Candidate_447_NC_011035(para),Candidate_220_NC_011035(para),Candidate_288_NC_011035(para),Candidate_30_NC_011035(para)	-	-	-	-
Candidate_537_NC_011035	|	NGK_2524		GlnE	*	>>>	1	|	2119848	2119935	>>>	87	|	334	>>>	NGK_2525	UvrD	*	candidate	212	0.0034	T	6	Neisseria_gonorrhoeae_FA_1090_chromosome_<>Neisseria_meningitidis_MC58_chromosome_<>Neisseria_meningitidis_Z2491_chromosome_<>Neisseria_meningitidis_FAM18_chromosome_<>Neisseria_meningitidis_053442_chromosome_<>Neisseria_meningitidis_alpha14_chromosome_	RNA	-	9		Candidate_335_NC_011035(para),Candidate_336_NC_011035(para),Candidate_571_NC_011035(para),Candidate_133_NC_011035(para),Candidate_134_NC_011035(para),Candidate_155_NC_011035(para),Candidate_156_NC_011035(para),Candidate_446_NC_011035(para),Candidate_447_NC_011035(para)	-	-	-	-
Candidate_538_NC_011035	|	NGK_2525		UvrD	*	>>>	13	|	2122491	2122871	>>>	380	|	405	>>>	NGK_2526	hypothetical_protein	*	candidate	123	0.0048	B	6	Neisseria_gonorrhoeae_FA_1090_chromosome_<>Neisseria_meningitidis_MC58_chromosome_<>Neisseria_meningitidis_Z2491_chromosome_<>Neisseria_meningitidis_FAM18_chromosome_<>Neisseria_meningitidis_053442_chromosome_<>Neisseria_meningitidis_alpha14_chromosome_	RNA	-	21		Candidate_702_NC_011035(opp),Candidate_80_NC_011035(para),Candidate_58_NC_011035(para),Candidate_474_NC_011035(para),Candidate_766_NC_011035(para),Candidate_523_NC_011035(para),Candidate_691_NC_011035(para),Candidate_100_NC_011035(para),Candidate_126_NC_011035(para),Candidate_101_NC_011035(para),Candidate_534_NC_011035(para),Candidate_701_NC_011035(para),Candidate_399_NC_011035(para),Candidate_63…	-	-	-	-
Candidate_539_NC_011035	|	NGK_2532		Putative_integral_membrane_protein	*	>>>	1	|	2127697	2127789	>>>	92	|	-28	<<<	NGK_2533	Glucosyl_transferase	*	candidate	312	1.9e-07	T	4	Neisseria_gonorrhoeae_FA_1090_chromosome_<>Neisseria_meningitidis_Z2491_chromosome_<>Neisseria_meningitidis_FAM18_chromosome_<>Neisseria_meningitidis_053442_chromosome_	RNA	-	1		Candidate_771_NC_011035(para)	-	-	-	-
Candidate_540_NC_011035	|	NGK_2537		homoserine_kinase	*	>>>	17	|	2132063	2132230	<<<	167	|	0	<<<	NGK_2538	putative_glucokinase	*	candidate	409	1.6e-12	T	6	Neisseria_gonorrhoeae_FA_1090_chromosome_<>Neisseria_meningitidis_MC58_chromosome_<>Neisseria_meningitidis_Z2491_chromosome_<>Neisseria_meningitidis_FAM18_chromosome_<>Neisseria_meningitidis_053442_chromosome_<>Neisseria_meningitidis_alpha14_chromosome_	RNA	-	28		Candidate_541_NC_011035(anti),Candidate_281_NC_011035(para),Candidate_282_NC_011035(para),Candidate_342_NC_011035(para),Candidate_576_NC_011035(para),Candidate_577_NC_011035(para),Candidate_578_NC_011035(para),Candidate_412_NC_011035(para),Candidate_368_NC_011035(para),Candidate_369_NC_011035(para),Candidate_608_NC_011035(para),Candidate_621_NC_011035(para),Candidate_514_NC_011035(para),Candidate…	-	-	-	-E.coli_sig70_1(7.28|-62)
Candidate_541_NC_011035	|	NGK_2537		homoserine_kinase	*	>>>	1	|	2132047	2132127	>>>	80	|	103	<<<	NGK_2538	putative_glucokinase	*	candidate	409	1.6e-12	T	6	Neisseria_gonorrhoeae_FA_1090_chromosome_<>Neisseria_meningitidis_MC58_chromosome_<>Neisseria_meningitidis_Z2491_chromosome_<>Neisseria_meningitidis_FAM18_chromosome_<>Neisseria_meningitidis_053442_chromosome_<>Neisseria_meningitidis_alpha14_chromosome_	RNA	-	29		Candidate_540_NC_011035(anti),Candidate_281_NC_011035(para),Candidate_282_NC_011035(para),Candidate_413_NC_011035(para),Candidate_342_NC_011035(para),Candidate_576_NC_011035(para),Candidate_577_NC_011035(para),Candidate_578_NC_011035(para),Candidate_412_NC_011035(para),Candidate_368_NC_011035(para),Candidate_369_NC_011035(para),Candidate_608_NC_011035(para),Candidate_621_NC_011035(para),Candidate…	-	-	-	-
Candidate_542_NC_011035	|	NGK_2537		homoserine_kinase	*	>>>	1	|	2132047	2132274	>>>	227	|	-44	<<<	NGK_2538	putative_glucokinase	*	candidate	409	1.6e-12	T	6	Neisseria_gonorrhoeae_FA_1090_chromosome_<>Neisseria_meningitidis_MC58_chromosome_<>Neisseria_meningitidis_Z2491_chromosome_<>Neisseria_meningitidis_FAM18_chromosome_<>Neisseria_meningitidis_053442_chromosome_<>Neisseria_meningitidis_alpha14_chromosome_	RNA	-	1		Candidate_771_NC_011035(para)	-	-	-	-
Candidate_543_NC_011035	|	NGK_2547		phosphopantetheine_adenylyltransferase	*	>>>	-13	|	2140098	2140248	<<<	150	|	0	<<<	NGK_2548	hypothetical_protein	*	candidate	690	8.1e-25	B	1	Neisseria_gonorrhoeae_FA_1090_chromosome_	-	-	1		Candidate_771_NC_011035(para)	-	-	-	-
Candidate_544_NC_011035	|	NGK_2559		chaperonin_GroEL	*	>>>	1	|	2151871	2151949	>>>	78	|	153	>>>	NGK_2560	hypothetical_protein	*	candidate	106	0.0014	B	6	Neisseria_gonorrhoeae_FA_1090_chromosome_<>Neisseria_meningitidis_MC58_chromosome_<>Neisseria_meningitidis_Z2491_chromosome_<>Neisseria_meningitidis_FAM18_chromosome_<>Neisseria_meningitidis_053442_chromosome_<>Neisseria_meningitidis_alpha14_chromosome_	-	-	5		Candidate_707_NC_011035(opp),Candidate_601_NC_011035(para),Candidate_640_NC_011035(para),Candidate_650_NC_011035(para),Candidate_115_NC_011035(para)	-	-	-	-
Candidate_545_NC_011035	|	NGK_2562		putative_sodium-dependent_transporter	*	>>>	1	|	2154110	2154273	>>>	163	|	-41	<<<	NGK_2563	hypothetical_protein	*	candidate	512	8.3e-17	T	6	Neisseria_gonorrhoeae_FA_1090_chromosome_<>Neisseria_meningitidis_MC58_chromosome_<>Neisseria_meningitidis_Z2491_chromosome_<>Neisseria_meningitidis_FAM18_chromosome_<>Neisseria_meningitidis_053442_chromosome_<>Neisseria_meningitidis_alpha14_chromosome_	-	-	1		Candidate_771_NC_011035(para)	-	-	-	-
Candidate_546_NC_011035	|	NGK_2573		hypothetical_protein	*	>>>	17	|	2161853	2161912	>>>	59	|	162	<<<	NGK_2574	App	*	candidate	216	0.0012	T	8	Neisseria_gonorrhoeae_FA_1090_chromosome_<>Neisseria_meningitidis_MC58_chromosome_<>Neisseria_meningitidis_Z2491_chromosome_<>Thiobacillus_denitrificans_ATCC_25259_chromosome_<>Neisseria_meningitidis_FAM18_chromosome_<>Neisseria_meningitidis_053442_chromosome_<>Methylotenera_mobilis_JLW8_chromosome_<>Neisseria_meningitidis_alpha14_chromosome_	RNA	-	46		Candidate_325_NC_011035(para),Candidate_789_NC_011035(para),Candidate_281_NC_011035(para),Candidate_282_NC_011035(para),Candidate_373_NC_011035(para),Candidate_599_NC_011035(para),Candidate_316_NC_011035(para),Candidate_650_NC_011035(para),Candidate_362_NC_011035(para),Candidate_590_NC_011035(para),Candidate_713_NC_011035(para),Candidate_529_NC_011035(para),Candidate_699_NC_011035(para),Candidate…	-	-	-	-
Candidate_547_NC_011035	|	NGK_2573		hypothetical_protein	*	>>>	1	|	2161837	2162097	>>>	260	|	-23	<<<	NGK_2574	App	*	candidate	104	0.0041	T	6	Neisseria_gonorrhoeae_FA_1090_chromosome_<>Neisseria_meningitidis_MC58_chromosome_<>Neisseria_meningitidis_Z2491_chromosome_<>Neisseria_meningitidis_FAM18_chromosome_<>Neisseria_meningitidis_053442_chromosome_<>Neisseria_meningitidis_alpha14_chromosome_	RNA	-	1		Candidate_771_NC_011035(para)	-	-	-	-
Candidate_548_NC_011035	|	NGK_2577		tRNA_modification_GTPase_TrmE	*	>>>	25	|	2168292	2168360	>>>	68	|	304	>>>	NGK_2578	pilS_cassette	*	candidate	113	0.0048	T	6	Neisseria_gonorrhoeae_FA_1090_chromosome_<>Neisseria_meningitidis_MC58_chromosome_<>Neisseria_meningitidis_Z2491_chromosome_<>Neisseria_meningitidis_FAM18_chromosome_<>Neisseria_meningitidis_053442_chromosome_<>Neisseria_meningitidis_alpha14_chromosome_	RNA	-	0	-	-	-	-	-	-
Candidate_549_NC_011035	|	NGK_2582		hypothetical_protein	*	>>>	1	|	2174559	2174648	>>>	89	|	-31	<<<	NGK_2583	putative_para-aminobenzoate_synthase_component	*	candidate	232	0.00094	T	6	Neisseria_gonorrhoeae_FA_1090_chromosome_<>Neisseria_meningitidis_MC58_chromosome_<>Neisseria_meningitidis_Z2491_chromosome_<>Neisseria_meningitidis_FAM18_chromosome_<>Neisseria_meningitidis_053442_chromosome_<>Neisseria_meningitidis_alpha14_chromosome_	RNA	-	1		Candidate_771_NC_011035(para)	-	-	-	-
Candidate_550_NC_011035	|	NGK_2584		hypothetical_protein	*	>>>	1	|	2177594	2177686	>>>	92	|	-13	<<<	NGK_2585	aldehyde_dehydrogenase_A	*	candidate	301	5e-07	T	6	Neisseria_gonorrhoeae_FA_1090_chromosome_<>Neisseria_meningitidis_MC58_chromosome_<>Neisseria_meningitidis_Z2491_chromosome_<>Neisseria_meningitidis_FAM18_chromosome_<>Neisseria_meningitidis_053442_chromosome_<>Neisseria_meningitidis_alpha14_chromosome_	RNA	-	1		Candidate_771_NC_011035(para)	-	-	-	-
Candidate_551_NC_011035	|	NGK_2597		putative_thioredoxin	*	>>>	1	|	2185600	2185663	>>>	63	|	168	<<<	NGK_2598	putative_acetyltransferase	*	candidate	101	0.0046	B	6	Neisseria_gonorrhoeae_FA_1090_chromosome_<>Neisseria_meningitidis_MC58_chromosome_<>Neisseria_meningitidis_Z2491_chromosome_<>Neisseria_meningitidis_FAM18_chromosome_<>Neisseria_meningitidis_053442_chromosome_<>Neisseria_meningitidis_alpha14_chromosome_	-	-	32		Candidate_552_NC_011035(anti),Candidate_711_NC_011035(anti),Candidate_676_NC_011035(para),Candidate_478_NC_011035(para),Candidate_672_NC_011035(para),Candidate_693_NC_011035(para),Candidate_407_NC_011035(para),Candidate_491_NC_011035(para),Candidate_492_NC_011035(para),Candidate_493_NC_011035(para),Candidate_464_NC_011035(para),Candidate_702_NC_011035(para),Candidate_703_NC_011035(para),Candidate…	-	-	-	-
Candidate_552_NC_011035	|	NGK_2597		putative_thioredoxin	*	>>>	20	|	2185619	2185831	<<<	212	|	0	<<<	NGK_2598	putative_acetyltransferase	*	candidate	101	0.0046	B	6	Neisseria_gonorrhoeae_FA_1090_chromosome_<>Neisseria_meningitidis_MC58_chromosome_<>Neisseria_meningitidis_Z2491_chromosome_<>Neisseria_meningitidis_FAM18_chromosome_<>Neisseria_meningitidis_053442_chromosome_<>Neisseria_meningitidis_alpha14_chromosome_	-	-	48		Candidate_551_NC_011035(anti),Candidate_676_NC_011035(para),Candidate_478_NC_011035(para),Candidate_672_NC_011035(para),Candidate_693_NC_011035(para),Candidate_407_NC_011035(para),Candidate_491_NC_011035(para),Candidate_492_NC_011035(para),Candidate_493_NC_011035(para),Candidate_464_NC_011035(para),Candidate_702_NC_011035(para),Candidate_703_NC_011035(para),Candidate_622_NC_011035(para),Candidate…	-	-	-	-
Candidate_553_NC_011035	|	NGK_2600		50S_ribosomal_protein_L31	*	>>>	15	|	2186798	2186862	>>>	64	|	626	>>>	NGK_2601	CadD	*	candidate	305	2.5e-07	T	18	Neisseria_gonorrhoeae_FA_1090_chromosome_<>Neisseria_meningitidis_MC58_chromosome_<>Neisseria_meningitidis_Z2491_chromosome_<>Streptococcus_pyogenes_MGAS8232_chromosome_<>Streptococcus_pyogenes_MGAS315_chromosome_<>Streptococcus_agalactiae_2603V/R_chromosome_<>Streptococcus_agalactiae_NEM316_chromosome_<>Streptococcus_pyogenes_SSI-1_chromosome_<>Streptococcus_pyogenes_MGAS10394_chromosome_<>Strep…	RNA	-	9		Candidate_68_NC_011035(anti),Candidate_713_NC_011035(tandem),Candidate_650_NC_011035(para),Candidate_733_NC_011035(para),Candidate_316_NC_011035(para),Candidate_603_NC_011035(para),Candidate_464_NC_011035(para),Candidate_661_NC_011035(para),Candidate_373_NC_011035(para),Candidate_599_NC_011035(para),Candidate_321_NC_011035(para)	-	-	-	-
Candidate_554_NC_011035	|	NGK_2604		regF	*	>>>	1	|	2190310	2190379	>>>	69	|	0	>>>	NGK_2605	ClpXP_protease_specificity-enhancing_factor	*	candidate	323	6e-08	T	5	Neisseria_gonorrhoeae_FA_1090_chromosome_<>Neisseria_meningitidis_MC58_chromosome_<>Neisseria_meningitidis_Z2491_chromosome_<>Neisseria_meningitidis_053442_chromosome_<>Neisseria_meningitidis_alpha14_chromosome_	RNA	-	0		Candidate_67_NC_011035(anti)	-	5	-	-
Candidate_555_NC_011035	|	NGK_2610		hypothetical_protein	*	>>>	1	|	2194126	2194284	>>>	158	|	-44	>>>	NGK_2611	putative_ABC_transporter,_ATP-binding_protein	*	candidate	562	1.3e-19	B	6	Neisseria_gonorrhoeae_FA_1090_chromosome_<>Neisseria_meningitidis_MC58_chromosome_<>Neisseria_meningitidis_Z2491_chromosome_<>Neisseria_meningitidis_FAM18_chromosome_<>Neisseria_meningitidis_053442_chromosome_<>Neisseria_meningitidis_alpha14_chromosome_	-	-	1		Candidate_771_NC_011035(para)	-	5	-	-E.coli_sig70_2(9.37|-134)
Candidate_556_NC_011035	|	NGK_2614		GNA1946	*	>>>	1	|	2196729	2196818	>>>	89	|	-29	<<<	NGK_2616	aromatic_acid_decarboxylase	*	candidate	286	3.3e-06	T	6	Neisseria_gonorrhoeae_FA_1090_chromosome_<>Neisseria_meningitidis_MC58_chromosome_<>Neisseria_meningitidis_Z2491_chromosome_<>Neisseria_meningitidis_FAM18_chromosome_<>Neisseria_meningitidis_053442_chromosome_<>Neisseria_meningitidis_alpha14_chromosome_	RNA	-	1		Candidate_771_NC_011035(para)	-	-	-	-
Candidate_559_NC_011035	|	NGK_2639		Myo-inositol-1(Or_4)-monophosphatase	*	>>>	13	|	2216346	2216536	>>>	190	|	16	<<<	NGK_2641	hypothetical_protein	*	candidate	850	3.1e-32	T	6	Neisseria_gonorrhoeae_FA_1090_chromosome_<>Neisseria_meningitidis_MC58_chromosome_<>Neisseria_meningitidis_Z2491_chromosome_<>Neisseria_meningitidis_FAM18_chromosome_<>Neisseria_meningitidis_053442_chromosome_<>Neisseria_meningitidis_alpha14_chromosome_	RNA	NC_002745_sprB(-)_-_(hom)	0	-	-	-	-	-	-
Candidate_560_NC_011035	|	NGK_2639		Myo-inositol-1(Or_4)-monophosphatase	*	>>>	13	|	2216346	2216578	>>>	232	|	-26	<<<	NGK_2641	hypothetical_protein	*	candidate	850	3.1e-32	T	6	Neisseria_gonorrhoeae_FA_1090_chromosome_<>Neisseria_meningitidis_MC58_chromosome_<>Neisseria_meningitidis_Z2491_chromosome_<>Neisseria_meningitidis_FAM18_chromosome_<>Neisseria_meningitidis_053442_chromosome_<>Neisseria_meningitidis_alpha14_chromosome_	RNA	-	1		Candidate_771_NC_011035(para)	-	-	-	-
Candidate_561_NC_011035	|	NGK_2656		Maf-like_protein	*	>>>	1	|	2228442	2228506	>>>	64	|	-8	>>>	NGK_2657	hypothetical_protein	*	candidate	254	1.5e-05	T	3	Neisseria_meningitidis_Z2491_chromosome_<>Neisseria_meningitidis_053442_chromosome_<>Neisseria_meningitidis_alpha14_chromosome_	-	-	1		Candidate_771_NC_011035(para)	-	5	-	-
Candidate_562_NC_011035	|	NGK_2657		hypothetical_protein	*	>>>	1	|	2229214	2229306	>>>	92	|	-14	<<<	NGK_2658	putative_inner_membrane_protein_translocase_compon	*	candidate	391	4.5e-11	T	6	Neisseria_gonorrhoeae_FA_1090_chromosome_<>Neisseria_meningitidis_MC58_chromosome_<>Neisseria_meningitidis_Z2491_chromosome_<>Neisseria_meningitidis_FAM18_chromosome_<>Neisseria_meningitidis_053442_chromosome_<>Neisseria_meningitidis_alpha14_chromosome_	RNA	-	1		Candidate_771_NC_011035(para)	-	-	-	-
Candidate_563_NC_011035	|	NGK_1229		isopropylmalate_isomerase_small_subunit	*	>>>	-42	|	1006551	1006758	<<<	207	|	0	>>>	NGK_1230	putative_DNA_modification_methylase_(N.MgoV)	*	candidate	714	5.3e-26	F	6	Neisseria_gonorrhoeae_FA_1090_chromosome_<>Neisseria_meningitidis_MC58_chromosome_<>Neisseria_meningitidis_Z2491_chromosome_<>Neisseria_meningitidis_FAM18_chromosome_<>Neisseria_meningitidis_053442_chromosome_<>Neisseria_meningitidis_alpha14_chromosome_	RNA	-	1		Candidate_771_NC_011035(para)	-	-	-	-E.coli_sig70_3(8.44|-157)
Candidate_564_NC_011035	|	NGK_1236		hypothetical_protein	*	>>>	-44	|	1011754	1011896	<<<	142	|	0	>>>	NGK_1237	putative_methylase_family_protein	*	candidate	459	1.3e-14	F	3	Neisseria_gonorrhoeae_FA_1090_chromosome_<>Neisseria_meningitidis_MC58_chromosome_<>Neisseria_meningitidis_alpha14_chromosome_	-	-	1		Candidate_771_NC_011035(para)	-	-	-	-E.coli_sig70_2(8.37|-108)
Candidate_565_NC_011035	|	NGK_0131		3-dehydroquinate_synthase	*	<<<	1	|	101210	101266	>>>	56	|	21	<<<	NGK_0132	shikimate_kinase	*	candidate	368	5e-10	F	6	Neisseria_gonorrhoeae_FA_1090_chromosome_<>Neisseria_meningitidis_MC58_chromosome_<>Neisseria_meningitidis_Z2491_chromosome_<>Neisseria_meningitidis_FAM18_chromosome_<>Neisseria_meningitidis_053442_chromosome_<>Neisseria_meningitidis_alpha14_chromosome_	-	-	0	-	-	-	-	-	-
Candidate_566_NC_011035	|	NGK_1282		HesB/YadR/YfhF_family_protein	*	>>>	4	|	1050540	1050747	<<<	207	|	50	>>>	NGK_1283	chaperone_protein_HscB	*	candidate	1046	4.4e-41	X	6	Neisseria_gonorrhoeae_FA_1090_chromosome_<>Neisseria_meningitidis_Z2491_chromosome_<>Neisseria_meningitidis_FAM18_chromosome_<>Neisseria_meningitidis_053442_chromosome_<>Actinobacillus_pleuropneumoniae_serovar_7_str._AP76_chromosome_<>Neisseria_meningitidis_alpha14_chromosome_	RNA	-	0		Candidate_320_NC_011035(anti)	-	-	-	-E.coli_sig70_2(9.50|-206)
Candidate_567_NC_011035	|	NGK_1314		integration_host_factor_subunit_beta	*	>>>	27	|	1083598	1083783	<<<	185	|	0	<<<	NGK_1315	putative_MerR-family_transcriptional_regulator	*	candidate	398	5.2e-34	Z	6	Neisseria_gonorrhoeae_FA_1090_chromosome_<>Neisseria_meningitidis_MC58_chromosome_<>Neisseria_meningitidis_Z2491_chromosome_<>Neisseria_meningitidis_FAM18_chromosome_<>Neisseria_meningitidis_053442_chromosome_<>Neisseria_meningitidis_alpha14_chromosome_	-	-	0	-	-	-	-	-	-
Candidate_568_NC_011035	|	NGK_1330		hypothetical_protein	*	<<<	1	|	1099084	1099254	>>>	170	|	-9	>>>	NGK_1331	hypothetical_protein	*	candidate	462	2.1e-14	X	6	Neisseria_gonorrhoeae_FA_1090_chromosome_<>Neisseria_meningitidis_MC58_chromosome_<>Neisseria_meningitidis_Z2491_chromosome_<>Neisseria_meningitidis_FAM18_chromosome_<>Neisseria_meningitidis_053442_chromosome_<>Neisseria_meningitidis_alpha14_chromosome_	RNA	-	1		Candidate_771_NC_011035(para)	-	5	RS	-
Candidate_569_NC_011035	|	NGK_0142		PonA	*	>>>	7	|	110766	110843	<<<	77	|	35	<<<	NGK_0143	ribosome_biogenesis_GTP-binding_protein_YsxC	*	candidate	377	1.8e-10	Z	6	Neisseria_gonorrhoeae_FA_1090_chromosome_<>Neisseria_meningitidis_MC58_chromosome_<>Neisseria_meningitidis_Z2491_chromosome_<>Neisseria_meningitidis_FAM18_chromosome_<>Neisseria_meningitidis_053442_chromosome_<>Neisseria_meningitidis_alpha14_chromosome_	RNA	-	23		Candidate_142_NC_011035(anti),Candidate_621_NC_011035(para),Candidate_477_NC_011035(para),Candidate_660_NC_011035(para),Candidate_275_NC_011035(para),Candidate_277_NC_011035(para),Candidate_514_NC_011035(para),Candidate_688_NC_011035(para),Candidate_366_NC_011035(para),Candidate_596_NC_011035(para),Candidate_373_NC_011035(para),Candidate_599_NC_011035(para),Candidate_734_NC_011035(para),Candidate…	-	-	-	-E.coli_sig70_3(7.26|-33)
Candidate_570_NC_011035	|	NGK_1348		carbonic_anhydrase	*	>>>	17	|	1112796	1112955	<<<	159	|	0	<<<	NGK_1349	excinuclease_ABC_subunit_B	*	candidate	885	9.9e-34	Z	1	Neisseria_gonorrhoeae_FA_1090_chromosome_	RNA	-	3		Candidate_334_NC_011035(anti),Candidate_31_NC_011035(para),Candidate_346_NC_011035(para),Candidate_580_NC_011035(para)	-	-	-	-
Candidate_571_NC_011035	|	NGK_1362		putative_dihydrolipoamide_dehydrogenase	*	>>>	12	|	1130459	1130519	>>>	60	|	350	<<<	NGK_1363	hypothetical_protein	*	candidate	167	0.0042	X	6	Neisseria_gonorrhoeae_FA_1090_chromosome_<>Neisseria_meningitidis_MC58_chromosome_<>Neisseria_meningitidis_Z2491_chromosome_<>Neisseria_meningitidis_FAM18_chromosome_<>Neisseria_meningitidis_053442_chromosome_<>Neisseria_meningitidis_alpha14_chromosome_	RNA	-	4		Candidate_336_NC_011035(anti),Candidate_537_NC_011035(para),Candidate_403_NC_011035(para),Candidate_469_NC_011035(para),Candidate_709_NC_011035(para)	-	-	-	-
Candidate_572_NC_011035	|	NGK_1363		hypothetical_protein	*	<<<	1	|	1132434	1132530	>>>	96	|	14	<<<	NGK_1364	putative_TonB-dependent_receptor_protein	*	candidate	446	9.6e-14	X	6	Neisseria_gonorrhoeae_FA_1090_chromosome_<>Neisseria_meningitidis_MC58_chromosome_<>Neisseria_meningitidis_Z2491_chromosome_<>Neisseria_meningitidis_FAM18_chromosome_<>Neisseria_meningitidis_053442_chromosome_<>Neisseria_meningitidis_alpha14_chromosome_	RNA	-	17		Candidate_186_NC_011035(para),Candidate_368_NC_011035(para),Candidate_369_NC_011035(para),Candidate_271_NC_011035(para),Candidate_621_NC_011035(para),Candidate_281_NC_011035(para),Candidate_282_NC_011035(para),Candidate_729_NC_011035(para),Candidate_540_NC_011035(para),Candidate_541_NC_011035(para),Candidate_741_NC_011035(para),Candidate_197_NC_011035(para),Candidate_523_NC_011035(para),Candidate…	-	-	-	-
Candidate_573_NC_011035	|	NGK_1402		acyl-CoA_synthetase	*	>>>	1	|	1168647	1168711	>>>	64	|	22	<<<	NGK_1403	putative_high-affinity_choline_transport_protein	*	candidate	374	2.3e-10	F	6	Neisseria_gonorrhoeae_FA_1090_chromosome_<>Neisseria_meningitidis_MC58_chromosome_<>Neisseria_meningitidis_Z2491_chromosome_<>Neisseria_meningitidis_FAM18_chromosome_<>Neisseria_meningitidis_053442_chromosome_<>Neisseria_meningitidis_alpha14_chromosome_	RNA	-	0	-	-	-	-	-	-
Candidate_574_NC_011035	|	NGK_1403		putative_high-affinity_choline_transport_protein	*	<<<	98	|	1170815	1170877	<<<	62	|	17	<<<	NGK_1404	IS1016_transposase	*	candidate	539	2.6e-18	F	4	Neisseria_gonorrhoeae_FA_1090_chromosome_<>Neisseria_meningitidis_MC58_chromosome_<>Neisseria_meningitidis_Z2491_chromosome_<>Neisseria_meningitidis_FAM18_chromosome_	-	-	0	-	-	-	3	-	-
Candidate_575_NC_011035	|	NGK_1407		hypothetical_protein	*	>>>	-3	|	1174006	1174098	<<<	92	|	169	>>>	NGK_1408	putative_integrase	*	candidate	319	7.1e-08	X	6	Neisseria_gonorrhoeae_FA_1090_chromosome_<>Neisseria_meningitidis_MC58_chromosome_<>Neisseria_meningitidis_Z2491_chromosome_<>Neisseria_meningitidis_FAM18_chromosome_<>Neisseria_meningitidis_053442_chromosome_<>Neisseria_meningitidis_alpha14_chromosome_	RNA	-	1		Candidate_771_NC_011035(para)	-	-	-	-
Candidate_576_NC_011035	|	NGK_1408		putative_integrase	*	>>>	98	|	1175356	1175442	<<<	86	|	192	>>>	NGK_1409	putative_phage_associated_protein	*	candidate	225	0.00073	X	4	Neisseria_gonorrhoeae_FA_1090_chromosome_<>Neisseria_meningitidis_MC58_chromosome_<>Neisseria_meningitidis_FAM18_chromosome_<>Neisseria_meningitidis_alpha14_chromosome_	RNA	-	13		Candidate_342_NC_011035(anti),Candidate_577_NC_011035(anti),Candidate_578_NC_011035(anti),Candidate_540_NC_011035(para),Candidate_541_NC_011035(para),Candidate_197_NC_011035(para),Candidate_102_NC_011035(para),Candidate_232_NC_011035(para),Candidate_760_NC_011035(para),Candidate_183_NC_011035(para),Candidate_731_NC_011035(para),Candidate_729_NC_011035(para),Candidate_608_NC_011035(para),Candidate…	-	-	-	-
Candidate_577_NC_011035	|	NGK_1408		putative_integrase	*	>>>	100	|	1175358	1175395	>>>	37	|	239	>>>	NGK_1409	putative_phage_associated_protein	*	candidate	234	0.00029	X	3	Neisseria_gonorrhoeae_FA_1090_chromosome_<>Neisseria_meningitidis_MC58_chromosome_<>Neisseria_meningitidis_FAM18_chromosome_	RNA	-	11		Candidate_342_NC_011035(tandem),Candidate_576_NC_011035(anti),Candidate_578_NC_011035(tandem),Candidate_540_NC_011035(para),Candidate_541_NC_011035(para),Candidate_197_NC_011035(para),Candidate_183_NC_011035(para),Candidate_731_NC_011035(para),Candidate_729_NC_011035(para),Candidate_608_NC_011035(para),Candidate_373_NC_011035(para),Candidate_599_NC_011035(para),Candidate_621_NC_011035(para)	-	-	-	-E.coli_sig70_3(7.85|-71)
Candidate_579_NC_011035	|	NGK_1408		putative_integrase	*	>>>	188	|	1175446	1175656	>>>	210	|	-22	>>>	NGK_1409	putative_phage_associated_protein	*	candidate	689	8.1e-25	X	4	Neisseria_gonorrhoeae_FA_1090_chromosome_<>Neisseria_meningitidis_MC58_chromosome_<>Neisseria_meningitidis_FAM18_chromosome_<>Neisseria_meningitidis_alpha14_chromosome_	RNA	-	1		Candidate_771_NC_011035(para)	-	5	RS	-E.coli_sig70_2(9.23|-210)E.coli_sig70_2(9.17|-159)E.coli_sig70_3(7.85|-332)
Candidate_580_NC_011035	|	NGK_1441		putative_phage_associated_protein	*	<<<	265	|	1200137	1200292	<<<	155	|	0	<<<	NGK_1442	putative_phage_associated_protein	*	candidate	1460	6.4e-60	Z	1	Neisseria_gonorrhoeae_FA_1090_chromosome_	RNA	-	2		Candidate_31_NC_011035(anti),Candidate_334_NC_011035(para),Candidate_570_NC_011035(para)	-	-	-	-E.coli_sig70_1(9.09|-84)
Candidate_581_NC_011035	|	NGK_1442		putative_phage_associated_protein	*	<<<	164	|	1201327	1201439	>>>	112	|	4	<<<	NGK_1443	hypothetical_protein	*	candidate	110	3e-05	X	14	Haemophilus_influenzae_Rd_KW20_chromosome_<>Neisseria_gonorrhoeae_FA_1090_chromosome_<>Neisseria_meningitidis_MC58_chromosome_<>Photorhabdus_luminescens_subsp._laumondii_TTO1_chromosome_<>Haemophilus_influenzae_86-028NP_chromosome_<>Haemophilus_somnus_129PT_chromosome_<>Neisseria_meningitidis_FAM18_chromosome_<>Actinobacillus_pleuropneumoniae_L20_chromosome_<>Actinobacillus_succinogenes_130Z_chro…	-	-	0	-	-	-	-	-	-
Candidate_582_NC_011035	|	NGK_trnaLeu5		tRNA-Leu	*	<<<	8	|	1218494	1218614	>>>	120	|	21	>>>	NGK_1474	hypothetical_protein	*	candidate	570	2e-19	X	6	Neisseria_gonorrhoeae_FA_1090_chromosome_<>Neisseria_meningitidis_MC58_chromosome_<>Neisseria_meningitidis_Z2491_chromosome_<>Neisseria_meningitidis_FAM18_chromosome_<>Neisseria_meningitidis_053442_chromosome_<>Neisseria_meningitidis_alpha14_chromosome_	-	-	0	-	-	-	5	-	-E.coli_sig70_2(7.95|-42)
Candidate_583_NC_011035	|	NGK_1488		hypothetical_protein	*	>>>	1	|	1230393	1230483	>>>	90	|	9	<<<	NGK_1489	nitric_oxide_reductase	*	candidate	231	0.00098	Y	6	Neisseria_gonorrhoeae_FA_1090_chromosome_<>Neisseria_meningitidis_MC58_chromosome_<>Neisseria_meningitidis_Z2491_chromosome_<>Neisseria_meningitidis_FAM18_chromosome_<>Neisseria_meningitidis_053442_chromosome_<>Neisseria_meningitidis_alpha14_chromosome_	RNA	-	13		Candidate_352_NC_011035(anti),Candidate_709_NC_011035(para),Candidate_611_NC_011035(para),Candidate_612_NC_011035(para),Candidate_373_NC_011035(para),Candidate_599_NC_011035(para),Candidate_667_NC_011035(para),Candidate_335_NC_011035(para),Candidate_571_NC_011035(para),Candidate_791_NC_011035(para),Candidate_193_NC_011035(para),Candidate_393_NC_011035(para),Candidate_144_NC_011035(para),Candidate…	-	-	-	-
Candidate_584_NC_011035	|	NGK_0155		putative_magnesium_citrate_secondary_transporter	*	>>>	1	|	123279	123413	>>>	134	|	131	>>>	NGK_0156	BasR	*	candidate	1056	1.5e-41	F	6	Neisseria_gonorrhoeae_FA_1090_chromosome_<>Neisseria_meningitidis_MC58_chromosome_<>Neisseria_meningitidis_Z2491_chromosome_<>Neisseria_meningitidis_FAM18_chromosome_<>Neisseria_meningitidis_053442_chromosome_<>Neisseria_meningitidis_alpha14_chromosome_	RNA	-	0	-	-	-	-	-	-
Candidate_585_NC_011035	|	NGK_0155		putative_magnesium_citrate_secondary_transporter	*	>>>	1	|	123279	123459	>>>	180	|	85	>>>	NGK_0156	BasR	*	candidate	1056	1.5e-41	F	6	Neisseria_gonorrhoeae_FA_1090_chromosome_<>Neisseria_meningitidis_MC58_chromosome_<>Neisseria_meningitidis_Z2491_chromosome_<>Neisseria_meningitidis_FAM18_chromosome_<>Neisseria_meningitidis_053442_chromosome_<>Neisseria_meningitidis_alpha14_chromosome_	RNA	-	0	-	-	-	-	-	-
Candidate_586_NC_011035	|	NGK_1492		pilin	*	>>>	1	|	1235882	1235968	>>>	86	|	72	>>>	NGK_1493	putative_secreted_protein	*	candidate	604	8.4e-22	X	6	Neisseria_gonorrhoeae_FA_1090_chromosome_<>Neisseria_meningitidis_MC58_chromosome_<>Neisseria_meningitidis_Z2491_chromosome_<>Neisseria_meningitidis_FAM18_chromosome_<>Neisseria_meningitidis_053442_chromosome_<>Neisseria_meningitidis_alpha14_chromosome_	-	-	4		Candidate_467_NC_011035(para),Candidate_402_NC_011035(para),Candidate_475_NC_011035(para),Candidate_468_NC_011035(para)	-	5	-	-
Candidate_587_NC_011035	|	NGK_1493		putative_secreted_protein	*	>>>	1	|	1236177	1236312	>>>	135	|	-37	>>>	NGK_1494	hypothetical_protein	*	candidate	190	0.0041	F	6	Neisseria_gonorrhoeae_FA_1090_chromosome_<>Neisseria_meningitidis_MC58_chromosome_<>Neisseria_meningitidis_Z2491_chromosome_<>Neisseria_meningitidis_FAM18_chromosome_<>Neisseria_meningitidis_053442_chromosome_<>Neisseria_meningitidis_alpha14_chromosome_	-	-	1		Candidate_771_NC_011035(para)	-	5	-	-E.coli_sig70_1(7.47|-235)
Candidate_588_NC_011035	|	NGK_1503		translation_initiation_factor_IF-2	*	>>>	11	|	1246382	1246529	<<<	147	|	0	<<<	NGK_1504	Integral_membrane_protein	*	candidate	667	5.9e-24	Z	6	Neisseria_gonorrhoeae_FA_1090_chromosome_<>Neisseria_meningitidis_MC58_chromosome_<>Neisseria_meningitidis_Z2491_chromosome_<>Neisseria_meningitidis_FAM18_chromosome_<>Neisseria_meningitidis_053442_chromosome_<>Neisseria_meningitidis_alpha14_chromosome_	RNA	-	3		Candidate_358_NC_011035(anti),Candidate_589_NC_011035(anti),Candidate_281_NC_011035(para),Candidate_282_NC_011035(para),Candidate_403_NC_011035(para)	-	-	-	-
Candidate_589_NC_011035	|	NGK_1503		translation_initiation_factor_IF-2	*	>>>	7	|	1246378	1246450	>>>	72	|	79	<<<	NGK_1504	Integral_membrane_protein	*	candidate	667	5.9e-24	X	6	Neisseria_gonorrhoeae_FA_1090_chromosome_<>Neisseria_meningitidis_MC58_chromosome_<>Neisseria_meningitidis_Z2491_chromosome_<>Neisseria_meningitidis_FAM18_chromosome_<>Neisseria_meningitidis_053442_chromosome_<>Neisseria_meningitidis_alpha14_chromosome_	RNA	-	3	W	Candidate_359_NC_011035(anti),Candidate_588_NC_011035(anti),Candidate_281_NC_011035(para),Candidate_282_NC_011035(para),Candidate_403_NC_011035(para)	-	-	-	-
Candidate_590_NC_011035	|	NGK_1511		hypothetical_protein	*	>>>	65	|	1253488	1253559	<<<	71	|	30	<<<	NGK_1512	hypothetical_protein	*	candidate	225	0.00045	F	13	Neisseria_gonorrhoeae_FA_1090_chromosome_<>Neisseria_meningitidis_MC58_chromosome_<>Neisseria_meningitidis_Z2491_chromosome_<>Chromobacterium_violaceum_ATCC_12472_chromosome_<>Thiobacillus_denitrificans_ATCC_25259_chromosome_<>Methylobacillus_flagellatus_KT_chromosome_<>Ralstonia_metallidurans_CH34_chromosome_1<>Ralstonia_metallidurans_CH34_chromosome_2<>Neisseria_meningitidis_FAM18_chromosome_<>…	RNA	-	45		Candidate_362_NC_011035(anti),Candidate_650_NC_011035(para),Candidate_713_NC_011035(para),Candidate_726_NC_011035(para),Candidate_733_NC_011035(para),Candidate_529_NC_011035(para),Candidate_699_NC_011035(para),Candidate_764_NC_011035(para),Candidate_710_NC_011035(para),Candidate_281_NC_011035(para),Candidate_282_NC_011035(para),Candidate_316_NC_011035(para),Candidate_672_NC_011035(para),Candidate…	-	-	-	-E.coli_sig70_3(9.87|-99)
Candidate_591_NC_011035	|	NGK_1514		Alr	*	>>>	11	|	1255916	1255950	<<<	34	|	0	>>>	NGK_1515	hypothetical_protein	*	candidate	203	0.003	X	2	Neisseria_gonorrhoeae_FA_1090_chromosome_<>Neisseria_meningitidis_053442_chromosome_	RNA	-	0	-	-	-	-	-	-
Candidate_592_NC_011035	|	NGK_1525		putative_phage_associated_protein	*	>>>	182	|	1262395	1262434	<<<	39	|	0	>>>	NGK_1526	hypothetical_protein	*	candidate	434	1.6e-13	F	2	Neisseria_gonorrhoeae_FA_1090_chromosome_<>Neisseria_meningitidis_alpha14_chromosome_	RNA	-	2		Candidate_647_NC_011035(para),Candidate_363_NC_011035(opp),Candidate_682_NC_011035(para)	-	-	-	-
Candidate_593_NC_011035	|	NGK_1526		hypothetical_protein	*	>>>	-58	|	1262908	1263035	<<<	127	|	0	<<<	NGK_1527	comE_operon_protein_1-related_protein	*	candidate	110	0.0032	F	6	Neisseria_gonorrhoeae_FA_1090_chromosome_<>Neisseria_meningitidis_MC58_chromosome_<>Neisseria_meningitidis_Z2491_chromosome_<>Neisseria_meningitidis_FAM18_chromosome_<>Neisseria_meningitidis_053442_chromosome_<>Neisseria_meningitidis_alpha14_chromosome_	-	-	1		Candidate_771_NC_011035(para)	-	-	-	-E.coli_sig70_2(9.87|-150)
Candidate_594_NC_011035	|	NGK_1527		comE_operon_protein_1-related_protein	*	<<<	-3	|	1263162	1263303	<<<	141	|	3345	<<<	NGK_trnaAla1	tRNA-Ala	*	candidate	276	0	X	15	Methanocaldococcus_jannaschii_DSM_2661_chromosome_<>Treponema_pallidum_subsp._pallidum_str._Nichols_chromosome_<>Methanosarcina_mazei_Go1_chromosome_<>Magnetospirillum_magneticum_AMB-1_chromosome_<>Shewanella_sp._MR-4_chromosome_<>Coxiella_burnetii_Dugway_5J108-111_chromosome_<>Yersinia_pseudotuberculosis_YPIII_chromosome_<>Burkholderia_phymatum_STM815_chromosome_2<>Yersinia_pseudotuberculosis_PB…	-	-	1		Candidate_771_NC_011035(para)	-	5	-	-
Candidate_595_NC_011035	|	NGK_1527		comE_operon_protein_1-related_protein	*	<<<	1836	|	1265001	1265035	>>>	34	|	1613	<<<	NGK_trnaAla1	tRNA-Ala	*	candidate	626	6.7e-135	F	42	Thermotoga_maritima_MSB8_chromosome_<>Pyrococcus_horikoshii_OT3_chromosome_<>Rickettsia_prowazekii_str._Madrid_E_chromosome_<>Deinococcus_radiodurans_R1_chromosome_1<>Streptococcus_pneumoniae_TIGR4_chromosome_<>Brucella_melitensis_bv._1_str._16M_chromosome_I<>Pyrococcus_furiosus_DSM_3638_chromosome_<>Methanosarcina_acetivorans_C2A_chromosome_<>Methanosarcina_mazei_Go1_chromosome_<>Corynebacterium…	RNA	-	9		Candidate_33_NC_011035(tandem),Candidate_47_NC_011035(para),Candidate_50_NC_011035(para),Candidate_74_NC_011035(para),Candidate_502_NC_011035(para),Candidate_503_NC_011035(para),Candidate_504_NC_011035(para),Candidate_679_NC_011035(para),Candidate_680_NC_011035(para)	-	-	-	-
Candidate_596_NC_011035	|	NGK_1536		hypothetical_protein	*	>>>	13	|	1277215	1277409	<<<	194	|	0	<<<	NGK_1537	hemoglobin_receptor	*	candidate	953	7.2e-37	Z	6	Neisseria_gonorrhoeae_FA_1090_chromosome_<>Neisseria_meningitidis_MC58_chromosome_<>Neisseria_meningitidis_Z2491_chromosome_<>Neisseria_meningitidis_FAM18_chromosome_<>Neisseria_meningitidis_053442_chromosome_<>Neisseria_meningitidis_alpha14_chromosome_	RNA	-	22		Candidate_366_NC_011035(anti),Candidate_741_NC_011035(para),Candidate_621_NC_011035(para),Candidate_281_NC_011035(para),Candidate_282_NC_011035(para),Candidate_477_NC_011035(para),Candidate_660_NC_011035(para),Candidate_398_NC_011035(para),Candidate_608_NC_011035(para),Candidate_142_NC_011035(para),Candidate_569_NC_011035(para),Candidate_523_NC_011035(para),Candidate_691_NC_011035(para),Candidate…	-	-	-	-
Candidate_597_NC_011035	|	NGK_1552		hypothetical_protein	*	<<<	-3	|	1290647	1290976	<<<	329	|	104	<<<	NGK_1553	cytochrome_c5	*	candidate	207	0.0033	Y	6	Neisseria_gonorrhoeae_FA_1090_chromosome_<>Neisseria_meningitidis_MC58_chromosome_<>Neisseria_meningitidis_Z2491_chromosome_<>Neisseria_meningitidis_FAM18_chromosome_<>Neisseria_meningitidis_053442_chromosome_<>Neisseria_meningitidis_alpha14_chromosome_	RNA	-	1		Candidate_771_NC_011035(para)	-	5	RS	-
Candidate_598_NC_011035	|	NGK_1552		hypothetical_protein	*	<<<	373	|	1291023	1291068	>>>	45	|	12	<<<	NGK_1553	cytochrome_c5	*	candidate	260	2.1e-24	F	7	Neisseria_gonorrhoeae_FA_1090_chromosome_<>Neisseria_meningitidis_MC58_chromosome_<>Neisseria_meningitidis_Z2491_chromosome_<>Neisseria_meningitidis_FAM18_chromosome_<>Neisseria_meningitidis_053442_chromosome_<>Bacillus_cereus_G9842_chromosome_<>Neisseria_meningitidis_alpha14_chromosome_	-	-	0	-	-	-	-	-	-
Candidate_599_NC_011035	|	NGK_1587		putative_sodium_dependent_ion_transport_protein	*	>>>	15	|	1321003	1321161	<<<	158	|	0	<<<	NGK_1588	NosX_protein	*	candidate	89	0.0041	Z	6	Neisseria_gonorrhoeae_FA_1090_chromosome_<>Neisseria_meningitidis_MC58_chromosome_<>Neisseria_meningitidis_Z2491_chromosome_<>Neisseria_meningitidis_FAM18_chromosome_<>Neisseria_meningitidis_053442_chromosome_<>Neisseria_meningitidis_alpha14_chromosome_	RNA	-	84		Candidate_373_NC_011035(anti),Candidate_546_NC_011035(para),Candidate_789_NC_011035(para),Candidate_722_NC_011035(para),Candidate_529_NC_011035(para),Candidate_699_NC_011035(para),Candidate_68_NC_011035(para),Candidate_553_NC_011035(para),Candidate_713_NC_011035(para),Candidate_325_NC_011035(para),Candidate_710_NC_011035(para),Candidate_733_NC_011035(para),Candidate_650_NC_011035(para),Candidate_…	-	-	-	-
Candidate_600_NC_011035	|	NGK_1587		putative_sodium_dependent_ion_transport_protein	*	>>>	104	|	1321092	1321162	>>>	70	|	-1	<<<	NGK_1588	NosX_protein	*	candidate	216	0.0012	F	8	Neisseria_gonorrhoeae_FA_1090_chromosome_<>Neisseria_meningitidis_MC58_chromosome_<>Neisseria_meningitidis_Z2491_chromosome_<>Thiobacillus_denitrificans_ATCC_25259_chromosome_<>Neisseria_meningitidis_FAM18_chromosome_<>Neisseria_meningitidis_053442_chromosome_<>Methylotenera_mobilis_JLW8_chromosome_<>Neisseria_meningitidis_alpha14_chromosome_	-	-	1		Candidate_771_NC_011035(para)	-	-	-	-
Candidate_601_NC_011035	|	NGK_1595		hypothetical_protein	*	>>>	1	|	1326509	1326636	>>>	127	|	71	<<<	NGK_1596	MtrE	*	candidate	95	0.0046	F	6	Neisseria_gonorrhoeae_FA_1090_chromosome_<>Neisseria_meningitidis_MC58_chromosome_<>Neisseria_meningitidis_Z2491_chromosome_<>Neisseria_meningitidis_FAM18_chromosome_<>Neisseria_meningitidis_053442_chromosome_<>Neisseria_meningitidis_alpha14_chromosome_	RNA	-	52		Candidate_703_NC_011035(para),Candidate_551_NC_011035(para),Candidate_552_NC_011035(para),Candidate_711_NC_011035(para),Candidate_527_NC_011035(para),Candidate_478_NC_011035(para),Candidate_672_NC_011035(para),Candidate_464_NC_011035(para),Candidate_693_NC_011035(para),Candidate_622_NC_011035(para),Candidate_623_NC_011035(para),Candidate_661_NC_011035(para),Candidate_685_NC_011035(para),Candidate…	-	-	-	-
Candidate_602_NC_011035	|	NGK_1601		hypothetical_protein	*	<<<	18	|	1333868	1333937	>>>	69	|	165	>>>	NGK_1602	antibiotic_resistance_efflux_pump_component	*	candidate	202	0.0036	X	7	Neisseria_gonorrhoeae_FA_1090_chromosome_<>Neisseria_meningitidis_MC58_chromosome_<>Neisseria_meningitidis_Z2491_chromosome_<>Neisseria_meningitidis_FAM18_chromosome_<>Neisseria_meningitidis_053442_chromosome_<>Neisseria_meningitidis_alpha14_chromosome_<>Halothiobacillus_neapolitanus_c2_chromosome_	RNA	-	18		Candidate_678_NC_011035(para),Candidate_125_NC_011035(para),Candidate_759_NC_011035(para),Candidate_637_NC_011035(para),Candidate_677_NC_011035(para),Candidate_636_NC_011035(para),Candidate_696_NC_011035(para),Candidate_399_NC_011035(para),Candidate_766_NC_011035(para),Candidate_210_NC_011035(para),Candidate_407_NC_011035(para),Candidate_534_NC_011035(para),Candidate_701_NC_011035(para),Candidate…	-	-	-	-
Candidate_603_NC_011035	|	NGK_1613		hypothetical_protein	*	>>>	53	|	1347047	1347493	<<<	446	|	0	<<<	NGK_1614	ExbD	*	candidate	119	0.004	Z	6	Neisseria_gonorrhoeae_FA_1090_chromosome_<>Neisseria_meningitidis_MC58_chromosome_<>Neisseria_meningitidis_Z2491_chromosome_<>Neisseria_meningitidis_FAM18_chromosome_<>Neisseria_meningitidis_053442_chromosome_<>Neisseria_meningitidis_alpha14_chromosome_	RNA	-	46		Candidate_376_NC_011035(anti),Candidate_615_NC_011035(para),Candidate_527_NC_011035(para),Candidate_685_NC_011035(para),Candidate_764_NC_011035(para),Candidate_3_NC_011035(para),Candidate_749_NC_011035(para),Candidate_153_NC_011035(para),Candidate_478_NC_011035(para),Candidate_672_NC_011035(para),Candidate_464_NC_011035(para),Candidate_703_NC_011035(para),Candidate_407_NC_011035(para),Candidate_6…	-	-	-	-E.coli_sig70_2(7.89|-444)
Candidate_604_NC_011035	|	NGK_1676		Periplasmic_protein	*	>>>	7	|	1393644	1393759	<<<	115	|	0	<<<	NGK_1677	probable_heat_shock_protein	*	candidate	579	9.4e-20	Y	6	Neisseria_gonorrhoeae_FA_1090_chromosome_<>Neisseria_meningitidis_MC58_chromosome_<>Neisseria_meningitidis_Z2491_chromosome_<>Neisseria_meningitidis_FAM18_chromosome_<>Neisseria_meningitidis_053442_chromosome_<>Neisseria_meningitidis_alpha14_chromosome_	RNA	-	1		Candidate_458_NC_011035(para)	-	-	-	-
Candidate_605_NC_011035	|	NGK_1689		molecular_chaperone_DnaK	*	>>>	14	|	1401473	1401635	<<<	162	|	75	>>>	NGK_1690	hypothetical_protein	*	candidate	655	2.9e-23	X	6	Neisseria_gonorrhoeae_FA_1090_chromosome_<>Neisseria_meningitidis_MC58_chromosome_<>Neisseria_meningitidis_Z2491_chromosome_<>Neisseria_meningitidis_FAM18_chromosome_<>Neisseria_meningitidis_053442_chromosome_<>Neisseria_meningitidis_alpha14_chromosome_	RNA	-	0		Candidate_386_NC_011035(anti)	-	-	-	-Multi_Fur(15.24|-180)
Candidate_606_NC_011035	|	NGK_1696		CadB	*	>>>	1	|	1407490	1407947	>>>	457	|	285	>>>	NGK_1697	putative_integral_membrane_protein	*	candidate	3642	3.6e-159	F	1	Neisseria_gonorrhoeae_FA_1090_chromosome_	RNA	-	1		Candidate_388_NC_011035(tandem)	-	-	-	-E.coli_sig70_1(8.32|-501)E.coli_sig70_1(8.40|-471)E.coli_sig70_3(8.73|-469)
Candidate_607_NC_011035	|	NGK_1699		Thiol:disulphide_interchange_protein	*	>>>	9	|	1412051	1412139	<<<	88	|	0	<<<	NGK_1700	putative_ABC_transporter,_ATP-binding_protein	*	candidate	123	0.00028	Z	5	Neisseria_gonorrhoeae_FA_1090_chromosome_<>Neisseria_meningitidis_MC58_chromosome_<>Neisseria_meningitidis_Z2491_chromosome_<>Neisseria_meningitidis_053442_chromosome_<>Neisseria_meningitidis_alpha14_chromosome_	RNA	-	3		Candidate_390_NC_011035(anti),Candidate_339_NC_011035(para),Candidate_340_NC_011035(para),Candidate_537_NC_011035(para)	-	-	-	-
Candidate_608_NC_011035	|	NGK_1702		PilV	*	>>>	13	|	1415947	1416010	>>>	63	|	16	<<<	NGK_1703	hypothetical_protein	*	candidate	204	0.0042	X	4	Neisseria_meningitidis_MC58_chromosome_<>Neisseria_meningitidis_Z2491_chromosome_<>Neisseria_meningitidis_FAM18_chromosome_<>Neisseria_meningitidis_053442_chromosome_	-	-	25		Candidate_412_NC_011035(para),Candidate_281_NC_011035(para),Candidate_282_NC_011035(para),Candidate_540_NC_011035(para),Candidate_541_NC_011035(para),Candidate_741_NC_011035(para),Candidate_185_NC_011035(para),Candidate_366_NC_011035(para),Candidate_596_NC_011035(para),Candidate_342_NC_011035(para),Candidate_576_NC_011035(para),Candidate_577_NC_011035(para),Candidate_621_NC_011035(para),Candidate…	-	-	-	-
Candidate_609_NC_011035	|	NGK_1706		hypothetical_protein	*	>>>	37	|	1421072	1421125	>>>	53	|	31	>>>	NGK_1707	hypothetical_protein	*	candidate	345	1.7e-09	X	6	Neisseria_gonorrhoeae_FA_1090_chromosome_<>Neisseria_meningitidis_MC58_chromosome_<>Neisseria_meningitidis_Z2491_chromosome_<>Neisseria_meningitidis_FAM18_chromosome_<>Neisseria_meningitidis_053442_chromosome_<>Neisseria_meningitidis_alpha14_chromosome_	RNA	-	10		Candidate_243_NC_011035(para),Candidate_403_NC_011035(para),Candidate_469_NC_011035(para),Candidate_769_NC_011035(para),Candidate_611_NC_011035(para),Candidate_612_NC_011035(para),Candidate_532_NC_011035(para),Candidate_352_NC_011035(para),Candidate_353_NC_011035(para),Candidate_529_NC_011035(para)	-	5	RS	-
Candidate_610_NC_011035	|	NGK_1716		hypothetical_protein	*	<<<	-3	|	1426886	1427117	<<<	231	|	3	<<<	NGK_1717	lysyl-tRNA_synthetase	*	candidate	102	0.005	Y	6	Neisseria_gonorrhoeae_FA_1090_chromosome_<>Neisseria_meningitidis_MC58_chromosome_<>Neisseria_meningitidis_Z2491_chromosome_<>Neisseria_meningitidis_FAM18_chromosome_<>Neisseria_meningitidis_053442_chromosome_<>Neisseria_meningitidis_alpha14_chromosome_	RNA	-	1		Candidate_771_NC_011035(para)	-	5	RS	-
Candidate_611_NC_011035	|	NGK_1759		arginine_decarboxylase	*	<<<	75	|	1459413	1459503	<<<	90	|	0	<<<	NGK_1760	Hypothetical_periplasmic_protein	*	candidate	825	5.4e-31	Y	6	Neisseria_gonorrhoeae_FA_1090_chromosome_<>Neisseria_meningitidis_MC58_chromosome_<>Neisseria_meningitidis_Z2491_chromosome_<>Neisseria_meningitidis_FAM18_chromosome_<>Neisseria_meningitidis_053442_chromosome_<>Neisseria_meningitidis_alpha14_chromosome_	RNA	-	13		Candidate_612_NC_011035(anti),Candidate_373_NC_011035(para),Candidate_599_NC_011035(para),Candidate_729_NC_011035(para),Candidate_393_NC_011035(para),Candidate_709_NC_011035(para),Candidate_352_NC_011035(para),Candidate_353_NC_011035(para),Candidate_193_NC_011035(para),Candidate_514_NC_011035(para),Candidate_688_NC_011035(para),Candidate_734_NC_011035(para),Candidate_185_NC_011035(para),Candidate…	-	-	RS	-
Candidate_612_NC_011035	|	NGK_1759		arginine_decarboxylase	*	<<<	1	|	1459339	1459482	>>>	143	|	21	<<<	NGK_1760	Hypothetical_periplasmic_protein	*	candidate	825	5.4e-31	X	6	Neisseria_gonorrhoeae_FA_1090_chromosome_<>Neisseria_meningitidis_MC58_chromosome_<>Neisseria_meningitidis_Z2491_chromosome_<>Neisseria_meningitidis_FAM18_chromosome_<>Neisseria_meningitidis_053442_chromosome_<>Neisseria_meningitidis_alpha14_chromosome_	RNA	-	13		Candidate_611_NC_011035(anti),Candidate_373_NC_011035(para),Candidate_599_NC_011035(para),Candidate_729_NC_011035(para),Candidate_393_NC_011035(para),Candidate_709_NC_011035(para),Candidate_352_NC_011035(para),Candidate_353_NC_011035(para),Candidate_193_NC_011035(para),Candidate_514_NC_011035(para),Candidate_688_NC_011035(para),Candidate_734_NC_011035(para),Candidate_185_NC_011035(para),Candidate…	-	-	-	-
Candidate_613_NC_011035	|	NGK_1760		Hypothetical_periplasmic_protein	*	<<<	1	|	1459859	1459937	>>>	78	|	0	<<<	NGK_1761	aspartyl-tRNA_synthetase	*	candidate	354	2.1e-09	X	6	Neisseria_gonorrhoeae_FA_1090_chromosome_<>Neisseria_meningitidis_MC58_chromosome_<>Neisseria_meningitidis_Z2491_chromosome_<>Neisseria_meningitidis_FAM18_chromosome_<>Neisseria_meningitidis_053442_chromosome_<>Neisseria_meningitidis_alpha14_chromosome_	RNA	-	0	-	-	-	-	-	-
Candidate_614_NC_011035	|	NGK_1764		putative_phospholipase	*	<<<	72	|	1463880	1463954	<<<	74	|	0	<<<	NGK_1765	30S_ribosomal_protein_S20	*	candidate	689	6.9e-25	Z	6	Neisseria_gonorrhoeae_FA_1090_chromosome_<>Neisseria_meningitidis_MC58_chromosome_<>Neisseria_meningitidis_Z2491_chromosome_<>Neisseria_meningitidis_FAM18_chromosome_<>Neisseria_meningitidis_053442_chromosome_<>Neisseria_meningitidis_alpha14_chromosome_	RNA	-	0	-	-	-	3	-	-
Candidate_615_NC_011035	|	NGK_1767		Spermidine/putrescine_ABC_transporter,_periplasmic	*	>>>	280	|	1465946	1465987	<<<	41	|	278	<<<	NGK_1768	hypothetical_protein	*	candidate	159	4.2e-06	F	20	Neisseria_gonorrhoeae_FA_1090_chromosome_<>Coxiella_burnetii_RSA_493_chromosome_<>Neisseria_meningitidis_MC58_chromosome_<>Neisseria_meningitidis_Z2491_chromosome_<>Shewanella_sp._W3-18-1_chromosome_<>Neisseria_meningitidis_FAM18_chromosome_<>Polaromonas_naphthalenivorans_CJ2_chromosome_<>Shewanella_putrefaciens_CN-32_chromosome_<>Sphingomonas_wittichii_RW1_chromosome_<>Coxiella_burnetii_Dugway_5…	RNA	-	21		Candidate_398_NC_011035(opp),Candidate_210_NC_011035(para),Candidate_603_NC_011035(para),Candidate_478_NC_011035(para),Candidate_672_NC_011035(para),Candidate_551_NC_011035(para),Candidate_552_NC_011035(para),Candidate_711_NC_011035(para),Candidate_702_NC_011035(para),Candidate_245_NC_011035(para),Candidate_691_NC_011035(para),Candidate_80_NC_011035(para),Candidate_281_NC_011035(para),Candidate_2…	-	-	-	-
Candidate_616_NC_011035	|	NGK_1774		hypothetical_protein	*	<<<	40	|	1473210	1473451	<<<	241	|	219	<<<	NGK_1775	hypothetical_protein	*	candidate	231	0.0004	F	7	Neisseria_gonorrhoeae_FA_1090_chromosome_<>Neisseria_meningitidis_MC58_chromosome_<>Neisseria_meningitidis_Z2491_chromosome_<>Neisseria_meningitidis_FAM18_chromosome_<>Enterobacter_sp._638_chromosome_<>Neisseria_meningitidis_053442_chromosome_<>Neisseria_meningitidis_alpha14_chromosome_	RNA	-	3		Candidate_124_NC_011035(para),Candidate_128_NC_011035(para),Candidate_126_NC_011035(para)	-	-	RS	-
Candidate_617_NC_011035	|	NGK_1796		pilin	*	>>>	1	|	1490279	1490365	>>>	86	|	72	>>>	NGK_1797	putative_secreted_protein	*	candidate	595	2.1e-21	X	6	Neisseria_gonorrhoeae_FA_1090_chromosome_<>Neisseria_meningitidis_MC58_chromosome_<>Neisseria_meningitidis_Z2491_chromosome_<>Neisseria_meningitidis_FAM18_chromosome_<>Neisseria_meningitidis_053442_chromosome_<>Neisseria_meningitidis_alpha14_chromosome_	-	-	4		Candidate_475_NC_011035(para),Candidate_357_NC_011035(para),Candidate_467_NC_011035(para),Candidate_468_NC_011035(para)	-	5	-	-
Candidate_618_NC_011035	|	NGK_1797		putative_secreted_protein	*	>>>	1	|	1490574	1490709	>>>	135	|	-37	>>>	NGK_1798	hypothetical_protein	*	candidate	190	0.0041	F	6	Neisseria_gonorrhoeae_FA_1090_chromosome_<>Neisseria_meningitidis_MC58_chromosome_<>Neisseria_meningitidis_Z2491_chromosome_<>Neisseria_meningitidis_FAM18_chromosome_<>Neisseria_meningitidis_053442_chromosome_<>Neisseria_meningitidis_alpha14_chromosome_	-	-	1		Candidate_771_NC_011035(para)	-	5	-	-E.coli_sig70_1(7.47|-235)
Candidate_619_NC_011035	|	NGK_1804		Nitric_oxide-sensitive_repressor	*	>>>	4	|	1495946	1496102	<<<	156	|	0	<<<	NGK_1806	hypothetical_protein	*	candidate	535	8.9e-18	Z	6	Neisseria_gonorrhoeae_FA_1090_chromosome_<>Neisseria_meningitidis_MC58_chromosome_<>Neisseria_meningitidis_Z2491_chromosome_<>Neisseria_meningitidis_FAM18_chromosome_<>Neisseria_meningitidis_053442_chromosome_<>Neisseria_meningitidis_alpha14_chromosome_	RNA	-	4		Candidate_405_NC_011035(anti),Candidate_398_NC_011035(para),Candidate_281_NC_011035(para),Candidate_282_NC_011035(para),Candidate_729_NC_011035(para)	-	-	-	-
Candidate_620_NC_011035	|	NGK_1809		hypothetical_protein	*	<<<	1	|	1499509	1499553	>>>	44	|	503	<<<	NGK_1810	aconitate_hydratase	*	candidate	119	0.0046	X	6	Neisseria_gonorrhoeae_FA_1090_chromosome_<>Neisseria_meningitidis_MC58_chromosome_<>Neisseria_meningitidis_Z2491_chromosome_<>Neisseria_meningitidis_FAM18_chromosome_<>Neisseria_meningitidis_053442_chromosome_<>Neisseria_meningitidis_alpha14_chromosome_	-	-	6		Candidate_407_NC_011035(opp),Candidate_693_NC_011035(para),Candidate_807_NC_011035(para),Candidate_661_NC_011035(para),Candidate_685_NC_011035(para),Candidate_640_NC_011035(para)	-	-	-	-
Candidate_621_NC_011035	|	NGK_1815		hypothetical_protein	*	>>>	291	|	1506315	1506395	>>>	80	|	11	<<<	NGK_1816	hypothetical_protein	*	candidate	219	0.0012	X	273	Haemophilus_influenzae_Rd_KW20_chromosome_<>Methanocaldococcus_jannaschii_DSM_2661_chromosome_<>Helicobacter_pylori_26695_chromosome_<>Rickettsia_prowazekii_str._Madrid_E_chromosome_<>Borrelia_burgdorferi_B31_plasmid_lp38<>Ureaplasma_parvum_serovar_3_str._ATCC_700970_chromosome_<>Campylobacter_jejuni_subsp._jejuni_NCTC_11168_chromosome_<>Vibrio_cholerae_O1_biovar_El_Tor_str._N16961_chromosome_II<…	RNA	NC_002745_sprC(-)_-_(hom)	28		Candidate_183_NC_011035(para),Candidate_731_NC_011035(para),Candidate_477_NC_011035(para),Candidate_660_NC_011035(para),Candidate_366_NC_011035(para),Candidate_596_NC_011035(para),Candidate_291_NC_011035(para),Candidate_373_NC_011035(para),Candidate_599_NC_011035(para),Candidate_197_NC_011035(para),Candidate_142_NC_011035(para),Candidate_569_NC_011035(para),Candidate_281_NC_011035(para),Candidate…	-	-	-	-E.coli_sig70_1(7.71|-86)E.coli_sig70_1(7.25|-66)E.coli_sig70_2(8.17|-86)
Candidate_622_NC_011035	|	NGK_1826		phospho-N-acetylmuramoyl-pentapeptide-transferase	*	<<<	38	|	1519357	1519562	<<<	205	|	0	<<<	NGK_1827	Periplasmic_protein	*	candidate	102	0.004	Y	6	Neisseria_gonorrhoeae_FA_1090_chromosome_<>Neisseria_meningitidis_MC58_chromosome_<>Neisseria_meningitidis_Z2491_chromosome_<>Neisseria_meningitidis_FAM18_chromosome_<>Neisseria_meningitidis_053442_chromosome_<>Neisseria_meningitidis_alpha14_chromosome_	-	-	48		Candidate_623_NC_011035(anti),Candidate_693_NC_011035(para),Candidate_527_NC_011035(para),Candidate_702_NC_011035(para),Candidate_676_NC_011035(para),Candidate_661_NC_011035(para),Candidate_478_NC_011035(para),Candidate_672_NC_011035(para),Candidate_703_NC_011035(para),Candidate_464_NC_011035(para),Candidate_491_NC_011035(para),Candidate_492_NC_011035(para),Candidate_493_NC_011035(para),Candidate…	-	-	-	-
Candidate_623_NC_011035	|	NGK_1826		phospho-N-acetylmuramoyl-pentapeptide-transferase	*	<<<	1	|	1519320	1519559	>>>	239	|	3	<<<	NGK_1827	Periplasmic_protein	*	candidate	102	0.004	X	6	Neisseria_gonorrhoeae_FA_1090_chromosome_<>Neisseria_meningitidis_MC58_chromosome_<>Neisseria_meningitidis_Z2491_chromosome_<>Neisseria_meningitidis_FAM18_chromosome_<>Neisseria_meningitidis_053442_chromosome_<>Neisseria_meningitidis_alpha14_chromosome_	-	-	49		Candidate_622_NC_011035(anti),Candidate_693_NC_011035(para),Candidate_527_NC_011035(para),Candidate_702_NC_011035(para),Candidate_676_NC_011035(para),Candidate_661_NC_011035(para),Candidate_478_NC_011035(para),Candidate_672_NC_011035(para),Candidate_703_NC_011035(para),Candidate_464_NC_011035(para),Candidate_491_NC_011035(para),Candidate_492_NC_011035(para),Candidate_493_NC_011035(para),Candidate…	-	-	-	-
Candidate_624_NC_011035	|	NGK_1844		Sodium/proline_symporter	*	>>>	-36	|	1536153	1536277	<<<	124	|	0	<<<	NGK_1845	Aminotransferase_class-III	*	candidate	418	8.7e-13	Y	5	Neisseria_gonorrhoeae_FA_1090_chromosome_<>Neisseria_meningitidis_MC58_chromosome_<>Neisseria_meningitidis_Z2491_chromosome_<>Neisseria_meningitidis_053442_chromosome_<>Neisseria_meningitidis_alpha14_chromosome_	RNA	-	1		Candidate_771_NC_011035(para)	-	-	-	-
Candidate_625_NC_011035	|	NGK_1846		bifunctional_proline_dehydrogenase/pyrroline-5-car	*	>>>	-55	|	1539991	1540376	<<<	385	|	51	>>>	NGK_1847	outer_membrane_protein	*	candidate	117	0.0028	F	6	Neisseria_gonorrhoeae_FA_1090_chromosome_<>Neisseria_meningitidis_MC58_chromosome_<>Neisseria_meningitidis_Z2491_chromosome_<>Neisseria_meningitidis_FAM18_chromosome_<>Neisseria_meningitidis_053442_chromosome_<>Neisseria_meningitidis_alpha14_chromosome_	RNA	-	1		Candidate_771_NC_011035(para)	-	-	-	-
Candidate_626_NC_011035	|	NGK_1856		hypothetical_protein	*	>>>	1	|	1544831	1544959	>>>	128	|	-1	<<<	NGK_1857	hypothetical_protein	*	candidate	84	0.0041	F	6	Neisseria_gonorrhoeae_FA_1090_chromosome_<>Neisseria_meningitidis_MC58_chromosome_<>Neisseria_meningitidis_Z2491_chromosome_<>Neisseria_meningitidis_FAM18_chromosome_<>Neisseria_meningitidis_053442_chromosome_<>Neisseria_meningitidis_alpha14_chromosome_	-	-	1		Candidate_771_NC_011035(para)	-	-	-	-
Candidate_627_NC_011035	|	NGK_1862		IS1106_transposase	*	<<<	1	|	1550590	1550715	>>>	125	|	4	<<<	NGK_1863	beta-phosphoglucomutase	*	candidate	122	0.00028	X	6	Neisseria_gonorrhoeae_FA_1090_chromosome_<>Neisseria_meningitidis_MC58_chromosome_<>Neisseria_meningitidis_Z2491_chromosome_<>Neisseria_meningitidis_FAM18_chromosome_<>Neisseria_meningitidis_053442_chromosome_<>Neisseria_meningitidis_alpha14_chromosome_	RNA	-	3		Candidate_416_NC_011035(anti),Candidate_173_NC_011035(para),Candidate_366_NC_011035(para),Candidate_596_NC_011035(para)	-	-	-	-
Candidate_628_NC_011035	|	NGK_1874		hypothetical_protein	*	<<<	-35	|	1559886	1560152	<<<	266	|	0	>>>	NGK_1875	hypothetical_protein	*	candidate	100	0.0047	F	6	Neisseria_gonorrhoeae_FA_1090_chromosome_<>Neisseria_meningitidis_MC58_chromosome_<>Neisseria_meningitidis_Z2491_chromosome_<>Neisseria_meningitidis_FAM18_chromosome_<>Neisseria_meningitidis_053442_chromosome_<>Neisseria_meningitidis_alpha14_chromosome_	RNA	-	1		Candidate_771_NC_011035(para)	-	5	RS	-E.coli_sig70_2(8.17|-145)
Candidate_629_NC_011035	|	NGK_0195		IS1016_transposase	*	<<<	56	|	155880	156240	>>>	360	|	-4	>>>	NGK_0196	hypothetical_protein	*	candidate	114	0.0049	F	6	Neisseria_gonorrhoeae_FA_1090_chromosome_<>Neisseria_meningitidis_MC58_chromosome_<>Neisseria_meningitidis_Z2491_chromosome_<>Neisseria_meningitidis_FAM18_chromosome_<>Neisseria_meningitidis_053442_chromosome_<>Neisseria_meningitidis_alpha14_chromosome_	RNA	-	1		Candidate_771_NC_011035(para)	-	5	RS	-E.coli_sig70_1(7.47|-315)E.coli_sig70_2(7.64|-210)E.coli_sig70_3(7.06|-226)
Candidate_630_NC_011035	|	NGK_1930		putative_phage_associated_protein	*	<<<	149	|	1600158	1600189	<<<	31	|	302	>>>	NGK_1931	putative_phage_associated_protein	*	candidate	483	4.9e-16	X	4	Neisseria_gonorrhoeae_FA_1090_chromosome_<>Neisseria_meningitidis_MC58_chromosome_<>Neisseria_meningitidis_FAM18_chromosome_<>Neisseria_meningitidis_alpha14_chromosome_	RNA	-	0	-	-	-	-	-	-E.coli_sig70_1(7.07|-86)E.coli_sig70_2(7.49|-86)
Candidate_631_NC_011035	|	NGK_1957		hypothetical_protein	*	<<<	1	|	1615433	1615563	>>>	130	|	-18	<<<	NGK_1958	Putative_very_short_patch_repair_endonuclease	*	candidate	273	1.8e-06	X	6	Neisseria_gonorrhoeae_FA_1090_chromosome_<>Neisseria_meningitidis_MC58_chromosome_<>Neisseria_meningitidis_Z2491_chromosome_<>Neisseria_meningitidis_FAM18_chromosome_<>Neisseria_meningitidis_053442_chromosome_<>Neisseria_meningitidis_alpha14_chromosome_	-	-	1		Candidate_771_NC_011035(para)	-	-	-	-
Candidate_632_NC_011035	|	NGK_1963		hypothetical_protein	*	>>>	110	|	1619233	1619292	<<<	59	|	771	>>>	NGK_1965	hypothetical_protein	*	candidate	384	2.8e-10	X	6	Neisseria_gonorrhoeae_FA_1090_chromosome_<>Neisseria_meningitidis_MC58_chromosome_<>Neisseria_meningitidis_Z2491_chromosome_<>Neisseria_meningitidis_FAM18_chromosome_<>Neisseria_meningitidis_053442_chromosome_<>Neisseria_meningitidis_alpha14_chromosome_	RNA	-	4		Candidate_46_NC_011035(opp),Candidate_427_NC_011035(anti),Candidate_186_NC_011035(para),Candidate_183_NC_011035(para),Candidate_731_NC_011035(para)	-	-	-	-
Candidate_633_NC_011035	|	NGK_1965		hypothetical_protein	*	>>>	-58	|	1620396	1620523	<<<	127	|	0	<<<	NGK_1966	comE_operon_protein_1-related_protein	*	candidate	110	0.0032	F	6	Neisseria_gonorrhoeae_FA_1090_chromosome_<>Neisseria_meningitidis_MC58_chromosome_<>Neisseria_meningitidis_Z2491_chromosome_<>Neisseria_meningitidis_FAM18_chromosome_<>Neisseria_meningitidis_053442_chromosome_<>Neisseria_meningitidis_alpha14_chromosome_	-	-	1		Candidate_771_NC_011035(para)	-	-	-	-E.coli_sig70_2(9.87|-150)
Candidate_634_NC_011035	|	NGK_1966		comE_operon_protein_1-related_protein	*	<<<	-3	|	1620650	1620791	<<<	141	|	3345	<<<	NGK_trnaAla3	tRNA-Ala	*	candidate	276	0	Z	15	Methanocaldococcus_jannaschii_DSM_2661_chromosome_<>Treponema_pallidum_subsp._pallidum_str._Nichols_chromosome_<>Methanosarcina_mazei_Go1_chromosome_<>Magnetospirillum_magneticum_AMB-1_chromosome_<>Shewanella_sp._MR-4_chromosome_<>Coxiella_burnetii_Dugway_5J108-111_chromosome_<>Yersinia_pseudotuberculosis_YPIII_chromosome_<>Burkholderia_phymatum_STM815_chromosome_2<>Yersinia_pseudotuberculosis_PB…	-	-	1		Candidate_771_NC_011035(para)	-	5	-	-
Candidate_635_NC_011035	|	NGK_1983		ATP-dependent_DNA_helicase	*	>>>	81	|	1644966	1645149	<<<	183	|	96	<<<	NGK_1984	hypothetical_protein	*	candidate	279	1e-06	Y	1	Shewanella_sp._W3-18-1_chromosome_	RNA	-	0		Candidate_433_NC_011035(anti)	-	-	-	-
Candidate_636_NC_011035	|	NGK_2000		hypothetical_protein	*	<<<	45	|	1659606	1659700	<<<	94	|	255	<<<	NGK_2001	hypothetical_protein	*	candidate	124	0.0026	Z	21	Neisseria_gonorrhoeae_FA_1090_chromosome_<>Rickettsia_conorii_str._Malish_7_chromosome_<>Neisseria_meningitidis_MC58_chromosome_<>Neisseria_meningitidis_Z2491_chromosome_<>Rickettsia_felis_URRWXCal2_chromosome_<>Rickettsia_bellii_RML369-C_chromosome_<>Shewanella_sp._W3-18-1_chromosome_<>Neisseria_meningitidis_FAM18_chromosome_<>Polaromonas_naphthalenivorans_CJ2_chromosome_<>Sphingomonas_wittichii…	RNA	-	24		Candidate_678_NC_011035(para),Candidate_399_NC_011035(para),Candidate_691_NC_011035(para),Candidate_125_NC_011035(para),Candidate_759_NC_011035(para),Candidate_677_NC_011035(para),Candidate_538_NC_011035(para),Candidate_70_NC_011035(para),Candidate_637_NC_011035(para),Candidate_602_NC_011035(para),Candidate_407_NC_011035(para),Candidate_534_NC_011035(para),Candidate_701_NC_011035(para),Candidate_…	-	-	RS	-
Candidate_637_NC_011035	|	NGK_tRNAGlu3		tRNA-Glu	*	>>>	3	|	1671277	1671367	<<<	90	|	121	<<<	NGK_2017	hypothetical_protein	*	candidate	118	0.00024	Z	19	Neisseria_gonorrhoeae_FA_1090_chromosome_<>Coxiella_burnetii_RSA_493_chromosome_<>Rickettsia_conorii_str._Malish_7_chromosome_<>Neisseria_meningitidis_MC58_chromosome_<>Neisseria_meningitidis_Z2491_chromosome_<>Rickettsia_felis_URRWXCal2_chromosome_<>Neisseria_meningitidis_FAM18_chromosome_<>Polaromonas_naphthalenivorans_CJ2_chromosome_<>Sphingomonas_wittichii_RW1_chromosome_<>Coxiella_burnetii_D…	RNA	-	23		Candidate_59_NC_011035(para),Candidate_698_NC_011035(para),Candidate_49_NC_011035(para),Candidate_766_NC_011035(para),Candidate_678_NC_011035(para),Candidate_399_NC_011035(para),Candidate_474_NC_011035(para),Candidate_636_NC_011035(para),Candidate_602_NC_011035(para),Candidate_125_NC_011035(para),Candidate_759_NC_011035(para),Candidate_28_NC_011035(para),Candidate_309_NC_011035(para),Candidate_80…	-	-	-	-
Candidate_638_NC_011035	|	NGK_2033		hypothetical_protein	*	>>>	1	|	1682765	1682852	>>>	87	|	65	<<<	NGK_2034	hypothetical_protein	*	candidate	673	1.3e-24	F	1	Neisseria_gonorrhoeae_FA_1090_chromosome_	RNA	-	0	-	-	-	-	-	-
Candidate_639_NC_011035	|	NGK_2038		hypothetical_protein	*	<<<	63	|	1685258	1685521	<<<	263	|	0	<<<	NGK_2039	D-tyrosyl-tRNA(Tyr)_deacylase	*	candidate	1626	1.8e-67	Z	1	Neisseria_gonorrhoeae_FA_1090_chromosome_	RNA	-	0	-	-	-	-	-	-
Candidate_640_NC_011035	|	NGK_2055		Gpi	*	<<<	1	|	1698890	1699105	>>>	215	|	235	>>>	NGK_2056	PilG	*	candidate	118	0.0026	F	6	Neisseria_gonorrhoeae_FA_1090_chromosome_<>Neisseria_meningitidis_MC58_chromosome_<>Neisseria_meningitidis_Z2491_chromosome_<>Neisseria_meningitidis_FAM18_chromosome_<>Neisseria_meningitidis_053442_chromosome_<>Neisseria_meningitidis_alpha14_chromosome_	-	-	50		Candidate_693_NC_011035(para),Candidate_781_NC_011035(para),Candidate_785_NC_011035(para),Candidate_551_NC_011035(para),Candidate_552_NC_011035(para),Candidate_711_NC_011035(para),Candidate_661_NC_011035(para),Candidate_749_NC_011035(para),Candidate_245_NC_011035(para),Candidate_527_NC_011035(para),Candidate_478_NC_011035(para),Candidate_672_NC_011035(para),Candidate_464_NC_011035(para),Candidate…	-	-	-	-
Candidate_641_NC_011035	|	NGK_2055		Gpi	*	<<<	1	|	1698890	1699262	>>>	372	|	78	>>>	NGK_2056	PilG	*	candidate	118	0.0026	F	6	Neisseria_gonorrhoeae_FA_1090_chromosome_<>Neisseria_meningitidis_MC58_chromosome_<>Neisseria_meningitidis_Z2491_chromosome_<>Neisseria_meningitidis_FAM18_chromosome_<>Neisseria_meningitidis_053442_chromosome_<>Neisseria_meningitidis_alpha14_chromosome_	-	-	39		Candidate_693_NC_011035(para),Candidate_781_NC_011035(para),Candidate_785_NC_011035(para),Candidate_551_NC_011035(para),Candidate_552_NC_011035(para),Candidate_711_NC_011035(para),Candidate_661_NC_011035(para),Candidate_749_NC_011035(para),Candidate_245_NC_011035(para),Candidate_527_NC_011035(para),Candidate_478_NC_011035(para),Candidate_672_NC_011035(para),Candidate_464_NC_011035(para),Candidate…	-	5	-	-
Candidate_642_NC_011035	|	NGK_2060		PilF	*	<<<	164	|	1704265	1704345	<<<	80	|	0	<<<	NGK_tRNAArg4	tRNA-Arg	*	candidate	236	1.4e-45	Z	5	Neisseria_gonorrhoeae_FA_1090_chromosome_<>Neisseria_meningitidis_Z2491_chromosome_<>Neisseria_meningitidis_FAM18_chromosome_<>Neisseria_meningitidis_053442_chromosome_<>Neisseria_meningitidis_alpha14_chromosome_	RNA	-	0	-	-	-	-	-	-E.coli_sig70_3(8.88|-170)
Candidate_643_NC_011035	|	NGK_2078		putative_outer_membrane_protein_OmpU	*	<<<	166	|	1717657	1717791	<<<	134	|	0	<<<	NGK_2080	putative_virulence_associated_protein	*	candidate	1229	1.9e-49	Z	6	Neisseria_gonorrhoeae_FA_1090_chromosome_<>Neisseria_meningitidis_MC58_chromosome_<>Neisseria_meningitidis_Z2491_chromosome_<>Neisseria_meningitidis_FAM18_chromosome_<>Neisseria_meningitidis_053442_chromosome_<>Neisseria_meningitidis_alpha14_chromosome_	RNA	-	1		Candidate_298_NC_011035(para)	-	-	-	-
Candidate_644_NC_011035	|	NGK_2082		hypothetical_protein	*	>>>	-43	|	1718985	1719239	<<<	254	|	0	<<<	NGK_2084	hypothetical_protein	*	candidate	98	0.0048	F	6	Neisseria_gonorrhoeae_FA_1090_chromosome_<>Neisseria_meningitidis_MC58_chromosome_<>Neisseria_meningitidis_Z2491_chromosome_<>Neisseria_meningitidis_FAM18_chromosome_<>Neisseria_meningitidis_053442_chromosome_<>Neisseria_meningitidis_alpha14_chromosome_	RNA	-	1		Candidate_771_NC_011035(para)	-	-	-	-
Candidate_645_NC_011035	|	NGK_2093		major_outer_membrane_protein	*	>>>	38	|	1723340	1723438	<<<	98	|	0	<<<	NGK_2094	hypothetical_protein	*	candidate	685	1.5e-24	Z	1	Neisseria_gonorrhoeae_FA_1090_chromosome_	RNA	-	0		Candidate_646_NC_011035(anti)	-	-	-	-
Candidate_646_NC_011035	|	NGK_2093		major_outer_membrane_protein	*	>>>	1	|	1723303	1723371	>>>	68	|	67	<<<	NGK_2094	hypothetical_protein	*	candidate	685	1.5e-24	X	1	Neisseria_gonorrhoeae_FA_1090_chromosome_	RNA	-	0	W	Candidate_645_NC_011035(anti)	-	-	-	-
Candidate_647_NC_011035	|	NGK_2094		hypothetical_protein	*	<<<	226	|	1723782	1723821	<<<	39	|	0	>>>	NGK_2095	hypothetical_protein	*	candidate	434	1.6e-13	F	2	Neisseria_gonorrhoeae_FA_1090_chromosome_<>Neisseria_meningitidis_alpha14_chromosome_	RNA	-	3		Candidate_363_NC_011035(para),Candidate_592_NC_011035(para),Candidate_682_NC_011035(para)	-	-	-	-
Candidate_648_NC_011035	|	NGK_2095		hypothetical_protein	*	>>>	-58	|	1724295	1724422	<<<	127	|	0	<<<	NGK_2096	comE_operon_protein_1-related_protein	*	candidate	110	0.0032	F	6	Neisseria_gonorrhoeae_FA_1090_chromosome_<>Neisseria_meningitidis_MC58_chromosome_<>Neisseria_meningitidis_Z2491_chromosome_<>Neisseria_meningitidis_FAM18_chromosome_<>Neisseria_meningitidis_053442_chromosome_<>Neisseria_meningitidis_alpha14_chromosome_	-	-	1		Candidate_771_NC_011035(para)	-	-	-	-E.coli_sig70_2(9.87|-150)
Candidate_649_NC_011035	|	NGK_2096		comE_operon_protein_1-related_protein	*	<<<	-3	|	1724549	1724690	<<<	141	|	3345	<<<	NGK_trnaAla4	tRNA-Ala	*	candidate	276	0	Z	15	Methanocaldococcus_jannaschii_DSM_2661_chromosome_<>Treponema_pallidum_subsp._pallidum_str._Nichols_chromosome_<>Methanosarcina_mazei_Go1_chromosome_<>Magnetospirillum_magneticum_AMB-1_chromosome_<>Shewanella_sp._MR-4_chromosome_<>Coxiella_burnetii_Dugway_5J108-111_chromosome_<>Yersinia_pseudotuberculosis_YPIII_chromosome_<>Burkholderia_phymatum_STM815_chromosome_2<>Yersinia_pseudotuberculosis_PB…	-	-	1		Candidate_771_NC_011035(para)	-	5	-	-
Candidate_650_NC_011035	|	NGK_2117		hypothetical_protein	*	>>>	91	|	1753243	1753314	<<<	71	|	73	>>>	NGK_2118	MviN	*	candidate	225	0.00045	F	13	Neisseria_gonorrhoeae_FA_1090_chromosome_<>Neisseria_meningitidis_MC58_chromosome_<>Neisseria_meningitidis_Z2491_chromosome_<>Nitrosomonas_europaea_ATCC_19718_chromosome_<>Chromobacterium_violaceum_ATCC_12472_chromosome_<>Thiobacillus_denitrificans_ATCC_25259_chromosome_<>Methylobacillus_flagellatus_KT_chromosome_<>Ralstonia_metallidurans_CH34_chromosome_2<>Neisseria_meningitidis_FAM18_chromosome…	RNA	-	51		Candidate_362_NC_011035(para),Candidate_590_NC_011035(para),Candidate_68_NC_011035(para),Candidate_553_NC_011035(para),Candidate_713_NC_011035(para),Candidate_726_NC_011035(para),Candidate_733_NC_011035(para),Candidate_529_NC_011035(para),Candidate_699_NC_011035(para),Candidate_764_NC_011035(para),Candidate_710_NC_011035(para),Candidate_281_NC_011035(para),Candidate_282_NC_011035(para),Candidate_…	-	-	-	-
Candidate_651_NC_011035	|	NGK_2147		NADH_dehydrogenase_subunit_G	*	<<<	124	|	1782164	1782200	>>>	36	|	551	<<<	NGK_2148	NuoF	*	candidate	232	0.0014	F	13	Neisseria_gonorrhoeae_FA_1090_chromosome_<>Neisseria_meningitidis_MC58_chromosome_<>Neisseria_meningitidis_Z2491_chromosome_<>Rickettsia_bellii_RML369-C_chromosome_<>Neisseria_meningitidis_FAM18_chromosome_<>Shewanella_putrefaciens_CN-32_chromosome_<>Sphingomonas_wittichii_RW1_chromosome_<>Rickettsia_akari_str._Hartford_chromosome_<>Neisseria_meningitidis_053442_chromosome_<>Chlorobaculum_parvum_…	RNA	-	19		Candidate_52_NC_011035(tandem),Candidate_210_NC_011035(para),Candidate_534_NC_011035(para),Candidate_701_NC_011035(para),Candidate_407_NC_011035(para),Candidate_125_NC_011035(para),Candidate_759_NC_011035(para),Candidate_637_NC_011035(para),Candidate_523_NC_011035(para),Candidate_691_NC_011035(para),Candidate_677_NC_011035(para),Candidate_59_NC_011035(para),Candidate_698_NC_011035(para),Candidate…	-	-	-	-
Candidate_652_NC_011035	|	NGK_2159		hypothetical_protein	*	<<<	3	|	1791124	1791336	>>>	212	|	-37	>>>	NGK_2160	hypothetical_protein	*	candidate	205	0.0038	F	6	Neisseria_gonorrhoeae_FA_1090_chromosome_<>Neisseria_meningitidis_MC58_chromosome_<>Neisseria_meningitidis_Z2491_chromosome_<>Neisseria_meningitidis_FAM18_chromosome_<>Neisseria_meningitidis_053442_chromosome_<>Neisseria_meningitidis_alpha14_chromosome_	RNA	-	1		Candidate_771_NC_011035(para)	-	5	RS	-
Candidate_653_NC_011035	|	NGK_2162		pilin	*	>>>	1	|	1792479	1792565	>>>	86	|	308	>>>	NGK_2163	UDP-3-O-%5B3-hydroxymyristoyl%5D_N-acetylglucosami	*	candidate	111	0.0046	X	6	Neisseria_gonorrhoeae_FA_1090_chromosome_<>Neisseria_meningitidis_MC58_chromosome_<>Neisseria_meningitidis_Z2491_chromosome_<>Neisseria_meningitidis_FAM18_chromosome_<>Neisseria_meningitidis_053442_chromosome_<>Neisseria_meningitidis_alpha14_chromosome_	RNA	-	4		Candidate_475_NC_011035(para),Candidate_357_NC_011035(para),Candidate_402_NC_011035(para),Candidate_468_NC_011035(para)	-	-	-	-
Candidate_654_NC_011035	|	NGK_2164		PilE/pilin_(PilE)	*	>>>	1	|	1794440	1794526	>>>	86	|	214	>>>	NGK_2165	pilS_cassette	*	candidate	110	0.0048	X	6	Neisseria_gonorrhoeae_FA_1090_chromosome_<>Neisseria_meningitidis_MC58_chromosome_<>Neisseria_meningitidis_Z2491_chromosome_<>Neisseria_meningitidis_FAM18_chromosome_<>Neisseria_meningitidis_053442_chromosome_<>Neisseria_meningitidis_alpha14_chromosome_	RNA	-	4		Candidate_475_NC_011035(para),Candidate_467_NC_011035(para),Candidate_402_NC_011035(para),Candidate_357_NC_011035(para)	-	-	-	-
Candidate_655_NC_011035	|	NGK_2168		putative_secreted_protein	*	>>>	1	|	1796022	1796157	>>>	135	|	-37	>>>	NGK_2169	hypothetical_protein	*	candidate	190	0.0041	F	6	Neisseria_gonorrhoeae_FA_1090_chromosome_<>Neisseria_meningitidis_MC58_chromosome_<>Neisseria_meningitidis_Z2491_chromosome_<>Neisseria_meningitidis_FAM18_chromosome_<>Neisseria_meningitidis_053442_chromosome_<>Neisseria_meningitidis_alpha14_chromosome_	-	-	1		Candidate_771_NC_011035(para)	-	5	-	-E.coli_sig70_1(7.47|-235)
Candidate_656_NC_011035	|	NGK_2180		Possible_periplasmic_protein	*	<<<	1	|	1806762	1806816	>>>	54	|	251	<<<	NGK_2181	hypothetical_protein	*	candidate	106	0.004	F	6	Neisseria_gonorrhoeae_FA_1090_chromosome_<>Neisseria_meningitidis_MC58_chromosome_<>Neisseria_meningitidis_Z2491_chromosome_<>Neisseria_meningitidis_FAM18_chromosome_<>Neisseria_meningitidis_053442_chromosome_<>Neisseria_meningitidis_alpha14_chromosome_	-	-	0	-	-	-	-	-	-
Candidate_657_NC_011035	|	NGK_2180		Possible_periplasmic_protein	*	<<<	1	|	1806762	1807007	>>>	245	|	60	<<<	NGK_2181	hypothetical_protein	*	candidate	106	0.004	F	6	Neisseria_gonorrhoeae_FA_1090_chromosome_<>Neisseria_meningitidis_MC58_chromosome_<>Neisseria_meningitidis_Z2491_chromosome_<>Neisseria_meningitidis_FAM18_chromosome_<>Neisseria_meningitidis_053442_chromosome_<>Neisseria_meningitidis_alpha14_chromosome_	RNA	NC_003112_THI1(-)_-_(hom)	49		Candidate_676_NC_011035(para),Candidate_693_NC_011035(para),Candidate_702_NC_011035(para),Candidate_491_NC_011035(para),Candidate_492_NC_011035(para),Candidate_493_NC_011035(para),Candidate_478_NC_011035(para),Candidate_672_NC_011035(para),Candidate_551_NC_011035(para),Candidate_552_NC_011035(para),Candidate_711_NC_011035(para),Candidate_622_NC_011035(para),Candidate_623_NC_011035(para),Candidate…	-	-	-	-
Candidate_658_NC_011035	|	NGK_2182		putative_integral_membrane_protein	*	<<<	2	|	1808701	1808803	>>>	102	|	399	>>>	NGK_2183	Membrane-bound_lytic_murein_transglycosylase	*	candidate	458	2.3e-14	X	2	Neisseria_gonorrhoeae_FA_1090_chromosome_<>Escherichia_coli_BW2952_chromosome_	-	-	1		Candidate_79_NC_011035(opp)	-	-	-	-
Candidate_659_NC_011035	|	NGK_2194		large_pilS_cassette	*	>>>	1	|	1819329	1819415	>>>	86	|	399	<<<	NGK_2195	thiamine_biosynthesis_protein_ThiC	*	candidate	120	0.0048	X	6	Neisseria_gonorrhoeae_FA_1090_chromosome_<>Neisseria_meningitidis_MC58_chromosome_<>Neisseria_meningitidis_Z2491_chromosome_<>Neisseria_meningitidis_FAM18_chromosome_<>Neisseria_meningitidis_053442_chromosome_<>Neisseria_meningitidis_alpha14_chromosome_	-	-	4		Candidate_467_NC_011035(para),Candidate_402_NC_011035(para),Candidate_357_NC_011035(para),Candidate_468_NC_011035(para)	-	-	-	-
Candidate_660_NC_011035	|	NGK_2197		Putative_ABC_transporter,_ATP-binding_protein,_ami	*	>>>	21	|	1824161	1824224	<<<	63	|	41	<<<	NGK_2198	PtsI	*	candidate	262	1.6e-05	Z	5	Neisseria_gonorrhoeae_FA_1090_chromosome_<>Neisseria_meningitidis_MC58_chromosome_<>Neisseria_meningitidis_Z2491_chromosome_<>Neisseria_meningitidis_FAM18_chromosome_<>Neisseria_meningitidis_alpha14_chromosome_	RNA	-	43		Candidate_477_NC_011035(anti),Candidate_621_NC_011035(para),Candidate_81_NC_011035(para),Candidate_455_NC_011035(para),Candidate_142_NC_011035(para),Candidate_569_NC_011035(para),Candidate_275_NC_011035(para),Candidate_277_NC_011035(para),Candidate_366_NC_011035(para),Candidate_596_NC_011035(para),Candidate_446_NC_011035(para),Candidate_447_NC_011035(para),Candidate_540_NC_011035(para),Candidate_…	-	-	-	-E.coli_sig70_2(8.28|-70)
Candidate_661_NC_011035	|	NGK_2199		PtsH	*	<<<	31	|	1826342	1826530	<<<	188	|	0	<<<	NGK_2200	putative_sugar_transport_PTS_system_IIA_protein	*	candidate	112	0.0041	F	6	Neisseria_gonorrhoeae_FA_1090_chromosome_<>Neisseria_meningitidis_MC58_chromosome_<>Neisseria_meningitidis_Z2491_chromosome_<>Neisseria_meningitidis_FAM18_chromosome_<>Neisseria_meningitidis_053442_chromosome_<>Neisseria_meningitidis_alpha14_chromosome_	RNA	-	50		Candidate_622_NC_011035(para),Candidate_623_NC_011035(para),Candidate_703_NC_011035(para),Candidate_464_NC_011035(para),Candidate_527_NC_011035(para),Candidate_764_NC_011035(para),Candidate_478_NC_011035(para),Candidate_672_NC_011035(para),Candidate_685_NC_011035(para),Candidate_640_NC_011035(para),Candidate_551_NC_011035(para),Candidate_552_NC_011035(para),Candidate_711_NC_011035(para),Candidate…	-	-	RS	-
Candidate_662_NC_011035	|	NGK_2202		DNA_ligase	*	<<<	15	|	1828524	1828567	<<<	43	|	33	>>>	NGK_2203	putative_hydrolase	*	candidate	281	5.8e-06	F	6	Neisseria_gonorrhoeae_FA_1090_chromosome_<>Neisseria_meningitidis_MC58_chromosome_<>Neisseria_meningitidis_Z2491_chromosome_<>Neisseria_meningitidis_FAM18_chromosome_<>Neisseria_meningitidis_053442_chromosome_<>Neisseria_meningitidis_alpha14_chromosome_	-	-	1		Candidate_663_NC_011035(tandem)	-	5	-	-
Candidate_663_NC_011035	|	NGK_2202		DNA_ligase	*	<<<	37	|	1828546	1828600	<<<	54	|	0	>>>	NGK_2203	putative_hydrolase	*	candidate	250	0.00016	X	5	Neisseria_gonorrhoeae_FA_1090_chromosome_<>Neisseria_meningitidis_MC58_chromosome_<>Neisseria_meningitidis_Z2491_chromosome_<>Neisseria_meningitidis_053442_chromosome_<>Neisseria_meningitidis_alpha14_chromosome_	-	-	1		Candidate_662_NC_011035(tandem)	-	-	-	-
Candidate_664_NC_011035	|	NGK_2204		DNA_recombination_protein_rmuC-like_protein	*	<<<	1	|	1831092	1831412	>>>	320	|	9	<<<	NGK_2205	PetC	*	candidate	1398	3.5e-57	X	6	Neisseria_gonorrhoeae_FA_1090_chromosome_<>Neisseria_meningitidis_MC58_chromosome_<>Neisseria_meningitidis_Z2491_chromosome_<>Neisseria_meningitidis_FAM18_chromosome_<>Neisseria_meningitidis_053442_chromosome_<>Neisseria_meningitidis_alpha14_chromosome_	RNA	-	0	-	-	-	-	-	-E.coli_sig70_2(7.43|-196)
Candidate_665_NC_011035	|	NGK_2212		50S_ribosomal_protein_L13	*	<<<	173	|	1838152	1838365	<<<	213	|	5	<<<	NGK_2213	hypothetical_protein	*	candidate	274	1.7e-06	Z	13	Neisseria_gonorrhoeae_FA_1090_chromosome_<>Neisseria_meningitidis_MC58_chromosome_<>Neisseria_meningitidis_Z2491_chromosome_<>Nitrosomonas_europaea_ATCC_19718_chromosome_<>Chromobacterium_violaceum_ATCC_12472_chromosome_<>Dechloromonas_aromatica_RCB_chromosome_<>Nitrosospira_multiformis_ATCC_25196_chromosome_1<>Methylobacillus_flagellatus_KT_chromosome_<>Nitrosomonas_eutropha_C91_chromosome_<>Nei…	RNA	-	0		Candidate_666_NC_011035(anti)	-	-	-	-E.coli_sig70_2(8.49|-274)
Candidate_666_NC_011035	|	NGK_2212		50S_ribosomal_protein_L13	*	<<<	31	|	1838010	1838182	>>>	172	|	188	<<<	NGK_2213	hypothetical_protein	*	candidate	1765	8.7e-74	X	6	Neisseria_gonorrhoeae_FA_1090_chromosome_<>Neisseria_meningitidis_MC58_chromosome_<>Neisseria_meningitidis_Z2491_chromosome_<>Neisseria_meningitidis_FAM18_chromosome_<>Neisseria_meningitidis_053442_chromosome_<>Neisseria_meningitidis_alpha14_chromosome_	RNA	-	1	W	Candidate_78_NC_011035(opp),Candidate_665_NC_011035(anti)	-	-	-	-
Candidate_667_NC_011035	|	NGK_2215		NAD(P)H-dependent_glycerol-3-phosphate_dehydrogena	*	<<<	1	|	1840061	1840166	>>>	105	|	15	<<<	NGK_2216	phosphoenolpyruvate_carboxylase	*	candidate	601	9.6e-21	X	6	Neisseria_gonorrhoeae_FA_1090_chromosome_<>Neisseria_meningitidis_MC58_chromosome_<>Neisseria_meningitidis_Z2491_chromosome_<>Neisseria_meningitidis_FAM18_chromosome_<>Neisseria_meningitidis_053442_chromosome_<>Neisseria_meningitidis_alpha14_chromosome_	RNA	-	19		Candidate_373_NC_011035(para),Candidate_599_NC_011035(para),Candidate_413_NC_011035(para),Candidate_241_NC_011035(para),Candidate_352_NC_011035(para),Candidate_353_NC_011035(para),Candidate_621_NC_011035(para),Candidate_183_NC_011035(para),Candidate_731_NC_011035(para),Candidate_729_NC_011035(para),Candidate_185_NC_011035(para),Candidate_611_NC_011035(para),Candidate_612_NC_011035(para),Candidate…	-	-	-	-
Candidate_668_NC_011035	|	NGK_2217		ThiF	*	>>>	-4	|	1843817	1843879	<<<	62	|	39	<<<	NGK_2218	hypothetical_protein	*	candidate	245	5.1e-07	F	6	Neisseria_gonorrhoeae_FA_1090_chromosome_<>Neisseria_meningitidis_MC58_chromosome_<>Neisseria_meningitidis_Z2491_chromosome_<>Neisseria_meningitidis_FAM18_chromosome_<>Neisseria_meningitidis_053442_chromosome_<>Neisseria_meningitidis_alpha14_chromosome_	-	-	1		Candidate_771_NC_011035(para)	-	-	-	-
Candidate_669_NC_011035	|	NGK_2224		Putative_ABC_transporter,_periplasmic_binding_prot	*	<<<	18	|	1848030	1848170	>>>	140	|	-47	<<<	NGK_2225	Putative_ABC_transporter,_ATP-binding_protein,_ami	*	candidate	204	0.0041	F	6	Neisseria_gonorrhoeae_FA_1090_chromosome_<>Neisseria_meningitidis_MC58_chromosome_<>Neisseria_meningitidis_Z2491_chromosome_<>Neisseria_meningitidis_FAM18_chromosome_<>Neisseria_meningitidis_053442_chromosome_<>Neisseria_meningitidis_alpha14_chromosome_	-	-	1		Candidate_771_NC_011035(para)	-	-	-	-
Candidate_670_NC_011035	|	NGK_2228		TldD	*	<<<	162	|	1851965	1852007	<<<	42	|	39	>>>	NGK_2229	putative_permease_protein	*	candidate	240	5.3e-05	F	12	Neisseria_gonorrhoeae_FA_1090_chromosome_<>Neisseria_meningitidis_MC58_chromosome_<>Neisseria_meningitidis_Z2491_chromosome_<>Pseudomonas_fluorescens_Pf-5_chromosome_<>Pseudomonas_fluorescens_Pf0-1_chromosome_<>Neisseria_meningitidis_FAM18_chromosome_<>Pseudomonas_stutzeri_A1501_chromosome_<>Pseudomonas_mendocina_ymp_chromosome_<>Neisseria_meningitidis_053442_chromosome_<>Azotobacter_vinelandii_D…	-	NC_003112_THI2(+)_+_(hom|rev)	0	-	-	-	-	-	-
Candidate_671_NC_011035	|	NGK_2232		pilS_cassette	*	>>>	-31	|	1855176	1855430	<<<	254	|	0	>>>	NGK_2233	Thiamine_biosynthesis_protein_ThiS	*	candidate	101	0.0048	F	6	Neisseria_gonorrhoeae_FA_1090_chromosome_<>Neisseria_meningitidis_MC58_chromosome_<>Neisseria_meningitidis_Z2491_chromosome_<>Neisseria_meningitidis_FAM18_chromosome_<>Neisseria_meningitidis_053442_chromosome_<>Neisseria_meningitidis_alpha14_chromosome_	RNA	-	1		Candidate_771_NC_011035(para)	-	-	-	-
Candidate_672_NC_011035	|	NGK_2232		pilS_cassette	*	>>>	1	|	1855208	1855396	>>>	188	|	34	>>>	NGK_2233	Thiamine_biosynthesis_protein_ThiS	*	candidate	101	0.0048	F	6	Neisseria_gonorrhoeae_FA_1090_chromosome_<>Neisseria_meningitidis_MC58_chromosome_<>Neisseria_meningitidis_Z2491_chromosome_<>Neisseria_meningitidis_FAM18_chromosome_<>Neisseria_meningitidis_053442_chromosome_<>Neisseria_meningitidis_alpha14_chromosome_	-	-	54		Candidate_478_NC_011035(tandem),Candidate_551_NC_011035(para),Candidate_552_NC_011035(para),Candidate_711_NC_011035(para),Candidate_693_NC_011035(para),Candidate_703_NC_011035(para),Candidate_685_NC_011035(para),Candidate_527_NC_011035(para),Candidate_622_NC_011035(para),Candidate_623_NC_011035(para),Candidate_749_NC_011035(para),Candidate_785_NC_011035(para),Candidate_676_NC_011035(para),Candida…	-	5	-	-
Candidate_673_NC_011035	|	NGK_2236		hypothetical_protein	*	>>>	1	|	1857018	1857217	>>>	199	|	7	<<<	NGK_2237	Periplasmic_protein	*	candidate	881	1.2e-33	F	6	Neisseria_gonorrhoeae_FA_1090_chromosome_<>Neisseria_meningitidis_MC58_chromosome_<>Neisseria_meningitidis_Z2491_chromosome_<>Neisseria_meningitidis_FAM18_chromosome_<>Neisseria_meningitidis_053442_chromosome_<>Neisseria_meningitidis_alpha14_chromosome_	RNA	NC_003112_nrrF(+)_+_(hom)|NC_003112_nrrF(+)_+_(hom|rev)	0	-	-	-	-	-	-Multi_Fur(19.02|-175)E.coli_sig70_1(7.36|-179)E.coli_sig70_1(11.11|-165)E.coli_sig70_2(8.49|-176)E.coli_sig70_3(7.53|-176)
Candidate_674_NC_011035	|	NGK_2322		DNA_mismatch_repair_protein_MutS	*	>>>	2	|	1927387	1927579	>>>	192	|	-54	<<<	NGK_2323	hypothetical_protein	*	candidate	83	0.0034	F	6	Neisseria_gonorrhoeae_FA_1090_chromosome_<>Neisseria_meningitidis_MC58_chromosome_<>Neisseria_meningitidis_Z2491_chromosome_<>Neisseria_meningitidis_FAM18_chromosome_<>Neisseria_meningitidis_053442_chromosome_<>Neisseria_meningitidis_alpha14_chromosome_	RNA	-	1		Candidate_771_NC_011035(para)	-	-	-	-
Candidate_675_NC_011035	|	NGK_2335		UDP-N-acetylglucosamine_1-carboxyvinyltransferase	*	<<<	28	|	1936400	1936585	>>>	185	|	6	<<<	NGK_trnaLys2	tRNA-Lys	*	candidate	914	2.3e-35	X	6	Neisseria_gonorrhoeae_FA_1090_chromosome_<>Neisseria_meningitidis_MC58_chromosome_<>Neisseria_meningitidis_Z2491_chromosome_<>Neisseria_meningitidis_FAM18_chromosome_<>Neisseria_meningitidis_053442_chromosome_<>Neisseria_meningitidis_alpha14_chromosome_	RNA	-	0	-	-	-	-	-	-
Candidate_676_NC_011035	|	NGK_2340		hypothetical_protein	*	<<<	1	|	1941489	1941738	>>>	249	|	247	<<<	NGK_2341	hypothetical_protein	*	candidate	118	0.0049	F	6	Neisseria_gonorrhoeae_FA_1090_chromosome_<>Neisseria_meningitidis_MC58_chromosome_<>Neisseria_meningitidis_Z2491_chromosome_<>Neisseria_meningitidis_FAM18_chromosome_<>Neisseria_meningitidis_053442_chromosome_<>Neisseria_meningitidis_alpha14_chromosome_	-	-	51		Candidate_702_NC_011035(para),Candidate_693_NC_011035(para),Candidate_551_NC_011035(para),Candidate_552_NC_011035(para),Candidate_711_NC_011035(para),Candidate_491_NC_011035(para),Candidate_492_NC_011035(para),Candidate_493_NC_011035(para),Candidate_407_NC_011035(para),Candidate_527_NC_011035(para),Candidate_696_NC_011035(para),Candidate_622_NC_011035(para),Candidate_623_NC_011035(para),Candidate…	-	-	-	-
Candidate_677_NC_011035	|	NGK_2343		polyprotein	*	<<<	64	|	1945312	1945358	<<<	46	|	70	<<<	NGK_2344	hypothetical_protein	*	candidate	128	0.0046	Y	19	Neisseria_gonorrhoeae_FA_1090_chromosome_<>Coxiella_burnetii_RSA_493_chromosome_<>Rickettsia_conorii_str._Malish_7_chromosome_<>Neisseria_meningitidis_MC58_chromosome_<>Neisseria_meningitidis_Z2491_chromosome_<>Rickettsia_felis_URRWXCal2_chromosome_<>Chlorobium_chlorochromatii_CaD3_chromosome_<>Neisseria_meningitidis_FAM18_chromosome_<>Polaromonas_naphthalenivorans_CJ2_chromosome_<>Shewanella_put…	RNA	-	27		Candidate_125_NC_011035(para),Candidate_759_NC_011035(para),Candidate_733_NC_011035(para),Candidate_678_NC_011035(para),Candidate_527_NC_011035(para),Candidate_696_NC_011035(para),Candidate_766_NC_011035(para),Candidate_636_NC_011035(para),Candidate_602_NC_011035(para),Candidate_28_NC_011035(para),Candidate_309_NC_011035(para),Candidate_310_NC_011035(para),Candidate_805_NC_011035(para),Candidate_…	-	-	RS	-
Candidate_678_NC_011035	|	NGK_2345		hypothetical_protein	*	>>>	303	|	1946386	1946425	<<<	39	|	140	<<<	NGK_2346	Integral_membrane_protein	*	candidate	200	0.00046	Y	10	Neisseria_gonorrhoeae_FA_1090_chromosome_<>Neisseria_meningitidis_MC58_chromosome_<>Neisseria_meningitidis_Z2491_chromosome_<>Shewanella_sp._W3-18-1_chromosome_<>Neisseria_meningitidis_FAM18_chromosome_<>Shewanella_putrefaciens_CN-32_chromosome_<>Sphingomonas_wittichii_RW1_chromosome_<>Neisseria_meningitidis_053442_chromosome_<>Chlorobaculum_parvum_NCIB_8327_chromosome_<>Neisseria_meningitidis_al…	RNA	-	18		Candidate_677_NC_011035(para),Candidate_70_NC_011035(para),Candidate_527_NC_011035(para),Candidate_696_NC_011035(para),Candidate_58_NC_011035(para),Candidate_602_NC_011035(para),Candidate_636_NC_011035(para),Candidate_399_NC_011035(para),Candidate_637_NC_011035(para),Candidate_28_NC_011035(para),Candidate_309_NC_011035(para),Candidate_310_NC_011035(para),Candidate_805_NC_011035(para),Candidate_59…	-	-	-	-
Candidate_679_NC_011035	|	NGK_trnaAla5		tRNA-Ala	*	>>>	3457	|	1959596	1959632	<<<	36	|	189	<<<	NGK_2355	hypothetical_protein	*	candidate	367	6.8e-07	Z	12	Neisseria_gonorrhoeae_FA_1090_chromosome_<>Neisseria_meningitidis_MC58_chromosome_<>Neisseria_meningitidis_Z2491_chromosome_<>Shewanella_sp._MR-4_chromosome_<>Neisseria_meningitidis_FAM18_chromosome_<>Neisseria_meningitidis_053442_chromosome_<>Yersinia_pseudotuberculosis_YPIII_chromosome_<>Burkholderia_phymatum_STM815_chromosome_2<>Yersinia_pseudotuberculosis_PB1/+_chromosome_<>Stenotrophomonas_m…	-	-	5		Candidate_74_NC_011035(tandem),Candidate_502_NC_011035(tandem),Candidate_503_NC_011035(tandem),Candidate_504_NC_011035(anti),Candidate_680_NC_011035(anti),Candidate_33_NC_011035(para),Candidate_595_NC_011035(para),Candidate_47_NC_011035(para),Candidate_50_NC_011035(para)	-	-	-	-
Candidate_681_NC_011035	|	NGK_trnaAla5		tRNA-Ala	*	>>>	3513	|	1959652	1959880	>>>	228	|	-59	<<<	NGK_2355	hypothetical_protein	*	candidate	241	0.0049	F	6	Neisseria_gonorrhoeae_FA_1090_chromosome_<>Neisseria_meningitidis_MC58_chromosome_<>Neisseria_meningitidis_Z2491_chromosome_<>Neisseria_meningitidis_FAM18_chromosome_<>Neisseria_meningitidis_053442_chromosome_<>Neisseria_meningitidis_alpha14_chromosome_	RNA	-	1		Candidate_771_NC_011035(para)	-	-	-	-E.coli_sig70_2(9.87|-150)
Candidate_682_NC_011035	|	NGK_2355		hypothetical_protein	*	<<<	1	|	1960354	1960393	>>>	39	|	250	<<<	NGK_2356	IS1106_transposase	*	candidate	213	0.0045	F	2	Neisseria_gonorrhoeae_FA_1090_chromosome_<>Neisseria_meningitidis_alpha14_chromosome_	-	-	2		Candidate_647_NC_011035(para),Candidate_592_NC_011035(para)	-	-	-	-
Candidate_683_NC_011035	|	NGK_2360		dTDP-6-deoxy-L-mannose-dehydrogenase	*	<<<	1	|	1965164	1965199	>>>	35	|	101	<<<	NGK_2361	glucose-1-phosphate_thymidylyltransferase	*	candidate	666	1.8e-24	X	1	Neisseria_gonorrhoeae_FA_1090_chromosome_	RNA	-	0	-	-	-	-	-	-
Candidate_684_NC_011035	|	NGK_0249		hypothetical_protein	*	>>>	593	|	197552	197588	<<<	36	|	255	<<<	NGK_0250	IS1016_transposase	*	candidate	122	0.0049	Z	10	Haemophilus_influenzae_Rd_KW20_chromosome_<>Neisseria_gonorrhoeae_FA_1090_chromosome_<>Neisseria_meningitidis_MC58_chromosome_<>Neisseria_meningitidis_Z2491_chromosome_<>Haemophilus_influenzae_86-028NP_chromosome_<>Neisseria_meningitidis_FAM18_chromosome_<>Haemophilus_influenzae_PittEE_chromosome_<>Haemophilus_influenzae_PittGG_chromosome_<>Neisseria_meningitidis_053442_chromosome_<>Neisseria_men…	RNA	-	1		Candidate_163_NC_011035(tandem)	-	-	-	-
Candidate_685_NC_011035	|	NGK_2388		Bacteriocin_resistance_protein,_putative	*	<<<	210	|	1990172	1990476	>>>	304	|	301	<<<	NGK_2389	PhnO-related_protein	*	candidate	132	0.0041	F	6	Neisseria_gonorrhoeae_FA_1090_chromosome_<>Neisseria_meningitidis_MC58_chromosome_<>Neisseria_meningitidis_Z2491_chromosome_<>Neisseria_meningitidis_FAM18_chromosome_<>Neisseria_meningitidis_053442_chromosome_<>Neisseria_meningitidis_alpha14_chromosome_	RNA	-	47		Candidate_512_NC_011035(anti),Candidate_764_NC_011035(para),Candidate_603_NC_011035(para),Candidate_749_NC_011035(para),Candidate_3_NC_011035(para),Candidate_478_NC_011035(para),Candidate_672_NC_011035(para),Candidate_703_NC_011035(para),Candidate_527_NC_011035(para),Candidate_153_NC_011035(para),Candidate_551_NC_011035(para),Candidate_552_NC_011035(para),Candidate_711_NC_011035(para),Candidate_6…	-	-	-	-E.coli_sig70_2(7.77|-347)E.coli_sig70_3(7.85|-285)
Candidate_686_NC_011035	|	NGK_2392		hypothetical_protein	*	>>>	66	|	1994021	1994191	>>>	170	|	-54	<<<	NGK_2393	hypothetical_protein	*	candidate	205	0.0039	F	7	Neisseria_gonorrhoeae_FA_1090_chromosome_<>Neisseria_meningitidis_MC58_chromosome_<>Neisseria_meningitidis_Z2491_chromosome_<>Neisseria_meningitidis_FAM18_chromosome_<>Neisseria_meningitidis_053442_chromosome_<>Methylotenera_mobilis_JLW8_chromosome_<>Neisseria_meningitidis_alpha14_chromosome_	RNA	-	1		Candidate_771_NC_011035(para)	-	-	-	-
Candidate_687_NC_011035	|	NGK_2394		hypothetical_protein	*	<<<	-36	|	1995650	1995739	<<<	89	|	0	>>>	NGK_2395	hypothetical_protein	*	candidate	252	3.7e-05	F	3	Neisseria_meningitidis_Z2491_chromosome_<>Neisseria_meningitidis_FAM18_chromosome_<>Neisseria_meningitidis_alpha14_chromosome_	RNA	-	1		Candidate_771_NC_011035(para)	-	5	RS	-
Candidate_688_NC_011035	|	NGK_2406		DNA_topoisomerase_I	*	>>>	21	|	2006991	2007151	<<<	160	|	80	>>>	NGK_2407	thiamine_biosynthesis_protein_ThiC	*	candidate	110	4.2e-07	X	7	Neisseria_gonorrhoeae_FA_1090_chromosome_<>Neisseria_meningitidis_MC58_chromosome_<>Neisseria_meningitidis_Z2491_chromosome_<>Neisseria_meningitidis_FAM18_chromosome_<>Haemophilus_influenzae_PittGG_chromosome_<>Neisseria_meningitidis_053442_chromosome_<>Neisseria_meningitidis_alpha14_chromosome_	RNA	-	27		Candidate_514_NC_011035(anti),Candidate_16_NC_011035(para),Candidate_523_NC_011035(para),Candidate_691_NC_011035(para),Candidate_373_NC_011035(para),Candidate_599_NC_011035(para),Candidate_621_NC_011035(para),Candidate_741_NC_011035(para),Candidate_185_NC_011035(para),Candidate_540_NC_011035(para),Candidate_541_NC_011035(para),Candidate_142_NC_011035(para),Candidate_569_NC_011035(para),Candidate_…	-	-	-	-
Candidate_689_NC_011035	|	NGK_2421		DNA-directed_RNA_polymerase_subunit_beta_	*	>>>	21	|	2023893	2023964	<<<	71	|	291	>>>	NGK_2422	hypothetical_protein	*	candidate	424	1.3e-12	X	6	Neisseria_gonorrhoeae_FA_1090_chromosome_<>Neisseria_meningitidis_MC58_chromosome_<>Neisseria_meningitidis_Z2491_chromosome_<>Neisseria_meningitidis_FAM18_chromosome_<>Neisseria_meningitidis_053442_chromosome_<>Neisseria_meningitidis_alpha14_chromosome_	RNA	-	0		Candidate_518_NC_011035(anti)	-	-	-	-
Candidate_690_NC_011035	|	NGK_2432		30S_ribosomal_protein_S10	*	>>>	10	|	2031633	2031675	<<<	42	|	32	<<<	NGK_2433	hypothetical_protein	*	candidate	224	0.0024	Z	6	Neisseria_gonorrhoeae_FA_1090_chromosome_<>Neisseria_meningitidis_MC58_chromosome_<>Neisseria_meningitidis_Z2491_chromosome_<>Neisseria_meningitidis_FAM18_chromosome_<>Neisseria_meningitidis_053442_chromosome_<>Neisseria_meningitidis_alpha14_chromosome_	RNA	-	0		Candidate_521_NC_011035(anti)	-	3	-	-
Candidate_691_NC_011035	|	NGK_2458		OxyR	*	>>>	4	|	2048721	2048838	<<<	117	|	512	<<<	NGK_2459	outer_membrane_protein_I_precursor	*	candidate	118	0.0017	Z	3	Shewanella_sp._W3-18-1_chromosome_<>Polaromonas_naphthalenivorans_CJ2_chromosome_<>Sphingomonas_wittichii_RW1_chromosome_	RNA	-	18		Candidate_523_NC_011035(anti),Candidate_525_NC_011035(opp),Candidate_692_NC_011035(opp),Candidate_58_NC_011035(para),Candidate_615_NC_011035(para),Candidate_538_NC_011035(para),Candidate_399_NC_011035(para),Candidate_80_NC_011035(para),Candidate_636_NC_011035(para),Candidate_407_NC_011035(para),Candidate_125_NC_011035(para),Candidate_759_NC_011035(para),Candidate_52_NC_011035(para),Candidate_651_…	-	-	-	-
Candidate_692_NC_011035	|	NGK_2458		OxyR	*	>>>	500	|	2049217	2049331	>>>	114	|	19	<<<	NGK_2459	outer_membrane_protein_I_precursor	*	candidate	247	0.00011	F	7	Methanosarcina_mazei_Go1_chromosome_<>Xylella_fastidiosa_Temecula1_chromosome_<>Burkholderia_pseudomallei_K96243_chromosome_1<>Burkholderia_pseudomallei_1710b_chromosome_I<>Burkholderia_pseudomallei_1106a_chromosome_I<>Yersinia_pestis_Angola_chromosome_<>Vibrio_splendidus_LGP32_chromosome_1	-	-	1		Candidate_523_NC_011035(tandem),Candidate_691_NC_011035(opp)	-	-	-	-
Candidate_693_NC_011035	|	NGK_2459		outer_membrane_protein_I_precursor	*	<<<	309	|	2050707	2050913	<<<	206	|	0	<<<	NGK_2460	tRNA_pseudouridine_synthase_A	*	candidate	118	0.0038	Y	6	Neisseria_gonorrhoeae_FA_1090_chromosome_<>Neisseria_meningitidis_MC58_chromosome_<>Neisseria_meningitidis_Z2491_chromosome_<>Neisseria_meningitidis_FAM18_chromosome_<>Neisseria_meningitidis_053442_chromosome_<>Neisseria_meningitidis_alpha14_chromosome_	RNA	-	52		Candidate_676_NC_011035(para),Candidate_702_NC_011035(para),Candidate_622_NC_011035(para),Candidate_623_NC_011035(para),Candidate_478_NC_011035(para),Candidate_672_NC_011035(para),Candidate_551_NC_011035(para),Candidate_552_NC_011035(para),Candidate_711_NC_011035(para),Candidate_491_NC_011035(para),Candidate_492_NC_011035(para),Candidate_493_NC_011035(para),Candidate_527_NC_011035(para),Candidate…	-	-	-	-
Candidate_694_NC_011035	|	NGK_2461		hypothetical_protein	*	<<<	-36	|	2052302	2052520	<<<	218	|	0	<<<	NGK_2462	hypothetical_protein	*	candidate	172	0.0038	F	6	Neisseria_gonorrhoeae_FA_1090_chromosome_<>Neisseria_meningitidis_MC58_chromosome_<>Neisseria_meningitidis_Z2491_chromosome_<>Neisseria_meningitidis_FAM18_chromosome_<>Neisseria_meningitidis_053442_chromosome_<>Neisseria_meningitidis_alpha14_chromosome_	RNA	-	1		Candidate_771_NC_011035(para)	-	5	RS	-
Candidate_695_NC_011035	|	NGK_2469		hypothetical_protein	*	<<<	43	|	2060838	2060994	>>>	156	|	6	<<<	NGK_2470	(3R)-hydroxymyristoyl-ACP_dehydratase	*	candidate	784	3.9e-29	X	3	Neisseria_gonorrhoeae_FA_1090_chromosome_<>Neisseria_meningitidis_Z2491_chromosome_<>Neisseria_meningitidis_FAM18_chromosome_	RNA	-	0	-	-	-	-	-	-E.coli_sig70_2(9.84|-243)E.coli_sig70_2(9.16|-101)
Candidate_696_NC_011035	|	NGK_2484		putative_parA_family_protein_-_putative_ATPase	*	>>>	284	|	2076155	2076280	>>>	125	|	335	<<<	NGK_2485	ribonuclease_HII	*	candidate	146	0.0044	X	8	Neisseria_gonorrhoeae_FA_1090_chromosome_<>Neisseria_meningitidis_MC58_chromosome_<>Neisseria_meningitidis_Z2491_chromosome_<>Neisseria_meningitidis_FAM18_chromosome_<>Sphingomonas_wittichii_RW1_chromosome_<>Neisseria_meningitidis_053442_chromosome_<>Cupriavidus_taiwanensis_chromosome_2<>Neisseria_meningitidis_alpha14_chromosome_	RNA	-	14		Candidate_70_NC_011035(opp),Candidate_527_NC_011035(tandem),Candidate_676_NC_011035(para),Candidate_678_NC_011035(para),Candidate_125_NC_011035(para),Candidate_759_NC_011035(para),Candidate_677_NC_011035(para),Candidate_534_NC_011035(para),Candidate_701_NC_011035(para),Candidate_316_NC_011035(para),Candidate_126_NC_011035(para),Candidate_80_NC_011035(para),Candidate_602_NC_011035(para),Candidate_…	-	-	-	-
Candidate_697_NC_011035	|	NGK_trnaLeu2		tRNA-Leu	*	>>>	-57	|	208059	208164	<<<	105	|	0	>>>	NGK_0261	putative_periplasmic_protease	*	candidate	236	0.00035	F	6	Neisseria_gonorrhoeae_FA_1090_chromosome_<>Neisseria_meningitidis_MC58_chromosome_<>Neisseria_meningitidis_Z2491_chromosome_<>Neisseria_meningitidis_FAM18_chromosome_<>Neisseria_meningitidis_053442_chromosome_<>Neisseria_meningitidis_alpha14_chromosome_	-	-	1		Candidate_771_NC_011035(para)	-	-	-	-
Candidate_698_NC_011035	|	NGK_2488		PdxA	*	>>>	5	|	2081920	2081956	<<<	36	|	187	<<<	NGK_2489	Rne	*	candidate	107	0.00089	Y	24	Neisseria_gonorrhoeae_FA_1090_chromosome_<>Coxiella_burnetii_RSA_493_chromosome_<>Neisseria_meningitidis_MC58_chromosome_<>Neisseria_meningitidis_Z2491_chromosome_<>Chlorobium_chlorochromatii_CaD3_chromosome_<>Shewanella_sp._W3-18-1_chromosome_<>Neisseria_meningitidis_FAM18_chromosome_<>Polaromonas_naphthalenivorans_CJ2_chromosome_<>Shewanella_putrefaciens_CN-32_chromosome_<>Sphingomonas_wittichi…	RNA	-	23		Candidate_59_NC_011035(anti),Candidate_637_NC_011035(para),Candidate_49_NC_011035(para),Candidate_399_NC_011035(para),Candidate_615_NC_011035(para),Candidate_538_NC_011035(para),Candidate_407_NC_011035(para),Candidate_678_NC_011035(para),Candidate_125_NC_011035(para),Candidate_759_NC_011035(para),Candidate_126_NC_011035(para),Candidate_636_NC_011035(para),Candidate_534_NC_011035(para),Candidate_7…	-	-	-	-
Candidate_699_NC_011035	|	NGK_2491		RluC	*	>>>	68	|	2086457	2086527	>>>	70	|	11	>>>	NGK_2492	lipid-A-disaccharide_synthase	*	candidate	234	0.00018	F	9	Neisseria_gonorrhoeae_FA_1090_chromosome_<>Neisseria_meningitidis_MC58_chromosome_<>Neisseria_meningitidis_Z2491_chromosome_<>Chromobacterium_violaceum_ATCC_12472_chromosome_<>Thiobacillus_denitrificans_ATCC_25259_chromosome_<>Neisseria_meningitidis_FAM18_chromosome_<>Neisseria_meningitidis_053442_chromosome_<>Methylotenera_mobilis_JLW8_chromosome_<>Neisseria_meningitidis_alpha14_chromosome_	RNA	-	49		Candidate_529_NC_011035(tandem),Candidate_650_NC_011035(para),Candidate_362_NC_011035(para),Candidate_590_NC_011035(para),Candidate_733_NC_011035(para),Candidate_713_NC_011035(para),Candidate_710_NC_011035(para),Candidate_281_NC_011035(para),Candidate_282_NC_011035(para),Candidate_726_NC_011035(para),Candidate_316_NC_011035(para),Candidate_153_NC_011035(para),Candidate_661_NC_011035(para),Candida…	-	5	RS	-
Candidate_700_NC_011035	|	NGK_2506		PrlC	*	>>>	183	|	2103988	2104098	<<<	110	|	286	<<<	NGK_2507	CcpR	*	candidate	129	0.0041	Z	6	Neisseria_gonorrhoeae_FA_1090_chromosome_<>Neisseria_meningitidis_MC58_chromosome_<>Neisseria_meningitidis_Z2491_chromosome_<>Neisseria_meningitidis_FAM18_chromosome_<>Neisseria_meningitidis_053442_chromosome_<>Neisseria_meningitidis_alpha14_chromosome_	RNA	-	2		Candidate_534_NC_011035(anti),Candidate_701_NC_011035(anti),Candidate_275_NC_011035(para),Candidate_277_NC_011035(para)	-	-	-	-
Candidate_701_NC_011035	|	NGK_2506		PrlC	*	>>>	122	|	2103927	2104027	>>>	100	|	357	<<<	NGK_2507	CcpR	*	candidate	141	0.0019	X	14	Neisseria_gonorrhoeae_FA_1090_chromosome_<>Coxiella_burnetii_RSA_493_chromosome_<>Neisseria_meningitidis_MC58_chromosome_<>Neisseria_meningitidis_Z2491_chromosome_<>Chlorobium_chlorochromatii_CaD3_chromosome_<>Erythrobacter_litoralis_HTCC2594_chromosome_<>Neisseria_meningitidis_FAM18_chromosome_<>Coxiella_burnetii_Dugway_5J108-111_chromosome_<>Rickettsia_akari_str._Hartford_chromosome_<>Coxiella_…	RNA	-	21	W	Candidate_534_NC_011035(tandem),Candidate_700_NC_011035(anti),Candidate_407_NC_011035(para),Candidate_474_NC_011035(para),Candidate_538_NC_011035(para),Candidate_527_NC_011035(para),Candidate_696_NC_011035(para),Candidate_126_NC_011035(para),Candidate_636_NC_011035(para),Candidate_651_NC_011035(para),Candidate_399_NC_011035(para),Candidate_59_NC_011035(para),Candidate_698_NC_011035(para),Candidat…	-	-	-	-
Candidate_702_NC_011035	|	NGK_2525		UvrD	*	>>>	585	|	2123063	2123275	<<<	212	|	1	>>>	NGK_2526	hypothetical_protein	*	candidate	121	0.0047	F	6	Neisseria_gonorrhoeae_FA_1090_chromosome_<>Neisseria_meningitidis_MC58_chromosome_<>Neisseria_meningitidis_Z2491_chromosome_<>Neisseria_meningitidis_FAM18_chromosome_<>Neisseria_meningitidis_053442_chromosome_<>Neisseria_meningitidis_alpha14_chromosome_	-	-	51		Candidate_538_NC_011035(opp),Candidate_807_NC_011035(para),Candidate_676_NC_011035(para),Candidate_693_NC_011035(para),Candidate_622_NC_011035(para),Candidate_623_NC_011035(para),Candidate_407_NC_011035(para),Candidate_491_NC_011035(para),Candidate_492_NC_011035(para),Candidate_493_NC_011035(para),Candidate_464_NC_011035(para),Candidate_551_NC_011035(para),Candidate_552_NC_011035(para),Candidate_…	-	-	-	-
Candidate_703_NC_011035	|	NGK_2539		GntP	*	<<<	623	|	2134295	2134497	<<<	202	|	48	>>>	NGK_2540	putative_ABC_transporter,_permease_protein	*	candidate	153	0.0037	F	6	Neisseria_gonorrhoeae_FA_1090_chromosome_<>Neisseria_meningitidis_MC58_chromosome_<>Neisseria_meningitidis_Z2491_chromosome_<>Neisseria_meningitidis_FAM18_chromosome_<>Neisseria_meningitidis_053442_chromosome_<>Neisseria_meningitidis_alpha14_chromosome_	RNA	-	51		Candidate_527_NC_011035(para),Candidate_464_NC_011035(para),Candidate_478_NC_011035(para),Candidate_672_NC_011035(para),Candidate_601_NC_011035(para),Candidate_3_NC_011035(para),Candidate_661_NC_011035(para),Candidate_622_NC_011035(para),Candidate_623_NC_011035(para),Candidate_512_NC_011035(para),Candidate_685_NC_011035(para),Candidate_764_NC_011035(para),Candidate_693_NC_011035(para),Candidate_4…	-	-	-	-
Candidate_704_NC_011035	|	NGK_2551		hypothetical_protein	*	<<<	1	|	2143700	2143751	>>>	51	|	-9	<<<	NGK_2552	Iron(III)_ABC_transporter,_permease_protein	*	candidate	220	0.0043	F	2	Neisseria_gonorrhoeae_FA_1090_chromosome_<>Neisseria_meningitidis_FAM18_chromosome_	-	-	1		Candidate_771_NC_011035(para)	-	-	-	-
Candidate_705_NC_011035	|	NGK_2555		ferric_enterobactin_periplasmic_binding_protein	*	<<<	7	|	2146882	2147101	>>>	219	|	-54	<<<	NGK_2556	hypothetical_protein	*	candidate	95	0.0013	F	6	Neisseria_gonorrhoeae_FA_1090_chromosome_<>Neisseria_meningitidis_MC58_chromosome_<>Neisseria_meningitidis_Z2491_chromosome_<>Neisseria_meningitidis_FAM18_chromosome_<>Neisseria_meningitidis_053442_chromosome_<>Neisseria_meningitidis_alpha14_chromosome_	RNA	-	1		Candidate_771_NC_011035(para)	-	-	-	-E.coli_sig70_2(7.61|-137)
Candidate_706_NC_011035	|	NGK_2557		FetA	*	<<<	139	|	2149680	2149794	<<<	114	|	0	>>>	NGK_2558	co-chaperonin_GroES	*	candidate	129	0.0049	X	6	Neisseria_gonorrhoeae_FA_1090_chromosome_<>Neisseria_meningitidis_MC58_chromosome_<>Neisseria_meningitidis_Z2491_chromosome_<>Neisseria_meningitidis_FAM18_chromosome_<>Neisseria_meningitidis_053442_chromosome_<>Neisseria_meningitidis_alpha14_chromosome_	-	-	3		Candidate_527_NC_011035(para),Candidate_464_NC_011035(para),Candidate_486_NC_011035(para)	-	-	-	-
Candidate_707_NC_011035	|	NGK_2559		chaperonin_GroEL	*	>>>	108	|	2151978	2152102	<<<	124	|	0	>>>	NGK_2560	hypothetical_protein	*	candidate	106	0.0014	F	6	Neisseria_gonorrhoeae_FA_1090_chromosome_<>Neisseria_meningitidis_MC58_chromosome_<>Neisseria_meningitidis_Z2491_chromosome_<>Neisseria_meningitidis_FAM18_chromosome_<>Neisseria_meningitidis_053442_chromosome_<>Neisseria_meningitidis_alpha14_chromosome_	-	-	48		Candidate_544_NC_011035(opp),Candidate_693_NC_011035(para),Candidate_622_NC_011035(para),Candidate_623_NC_011035(para),Candidate_676_NC_011035(para),Candidate_478_NC_011035(para),Candidate_672_NC_011035(para),Candidate_807_NC_011035(para),Candidate_702_NC_011035(para),Candidate_551_NC_011035(para),Candidate_552_NC_011035(para),Candidate_711_NC_011035(para),Candidate_491_NC_011035(para),Candidate_…	-	-	-	-
Candidate_708_NC_011035	|	NGK_2563		hypothetical_protein	*	<<<	2	|	2154676	2154722	>>>	46	|	144	<<<	NGK_2564	LysA	*	candidate	215	0.0014	F	4	Neisseria_gonorrhoeae_FA_1090_chromosome_<>Neisseria_meningitidis_MC58_chromosome_<>Neisseria_meningitidis_Z2491_chromosome_<>Neisseria_meningitidis_FAM18_chromosome_	-	-	3		Candidate_709_NC_011035(tandem),Candidate_301_NC_011035(para),Candidate_797_NC_011035(para)	-	-	-	-
Candidate_709_NC_011035	|	NGK_2563		hypothetical_protein	*	<<<	1	|	2154675	2154858	>>>	183	|	8	<<<	NGK_2564	LysA	*	candidate	965	2.2e-37	X	1	Neisseria_gonorrhoeae_FA_1090_chromosome_	RNA	-	13		Candidate_708_NC_011035(tandem),Candidate_352_NC_011035(para),Candidate_353_NC_011035(para),Candidate_611_NC_011035(para),Candidate_612_NC_011035(para),Candidate_791_NC_011035(para),Candidate_335_NC_011035(para),Candidate_336_NC_011035(para),Candidate_571_NC_011035(para),Candidate_373_NC_011035(para),Candidate_599_NC_011035(para),Candidate_301_NC_011035(para),Candidate_797_NC_011035(para)	-	-	-	-
Candidate_710_NC_011035	|	NGK_2581		Putative_hemoglobin_receptor_component_precursor_H	*	<<<	151	|	2172850	2172921	<<<	71	|	19	>>>	NGK_2582	hypothetical_protein	*	candidate	225	0.00045	F	9	Neisseria_gonorrhoeae_FA_1090_chromosome_<>Neisseria_meningitidis_MC58_chromosome_<>Neisseria_meningitidis_Z2491_chromosome_<>Chromobacterium_violaceum_ATCC_12472_chromosome_<>Thiobacillus_denitrificans_ATCC_25259_chromosome_<>Neisseria_meningitidis_FAM18_chromosome_<>Neisseria_meningitidis_053442_chromosome_<>Methylotenera_mobilis_JLW8_chromosome_<>Neisseria_meningitidis_alpha14_chromosome_	RNA	-	48		Candidate_68_NC_011035(para),Candidate_713_NC_011035(para),Candidate_650_NC_011035(para),Candidate_529_NC_011035(para),Candidate_699_NC_011035(para),Candidate_362_NC_011035(para),Candidate_590_NC_011035(para),Candidate_733_NC_011035(para),Candidate_726_NC_011035(para),Candidate_316_NC_011035(para),Candidate_281_NC_011035(para),Candidate_282_NC_011035(para),Candidate_672_NC_011035(para),Candidate_…	-	-	-	-
Candidate_711_NC_011035	|	NGK_2597		putative_thioredoxin	*	>>>	61	|	2185660	2185831	<<<	171	|	0	<<<	NGK_2598	putative_acetyltransferase	*	candidate	101	0.0046	Y	6	Neisseria_gonorrhoeae_FA_1090_chromosome_<>Neisseria_meningitidis_MC58_chromosome_<>Neisseria_meningitidis_Z2491_chromosome_<>Neisseria_meningitidis_FAM18_chromosome_<>Neisseria_meningitidis_053442_chromosome_<>Neisseria_meningitidis_alpha14_chromosome_	-	-	47		Candidate_551_NC_011035(anti),Candidate_676_NC_011035(para),Candidate_478_NC_011035(para),Candidate_672_NC_011035(para),Candidate_693_NC_011035(para),Candidate_407_NC_011035(para),Candidate_491_NC_011035(para),Candidate_492_NC_011035(para),Candidate_493_NC_011035(para),Candidate_464_NC_011035(para),Candidate_702_NC_011035(para),Candidate_703_NC_011035(para),Candidate_622_NC_011035(para),Candidate…	-	-	-	-
Candidate_712_NC_011035	|	NGK_2599		hypothetical_protein	*	<<<	2	|	2186331	2186553	>>>	222	|	-14	>>>	NGK_2600	50S_ribosomal_protein_L31	*	candidate	151	0.0037	F	6	Neisseria_gonorrhoeae_FA_1090_chromosome_<>Neisseria_meningitidis_MC58_chromosome_<>Neisseria_meningitidis_Z2491_chromosome_<>Neisseria_meningitidis_FAM18_chromosome_<>Neisseria_meningitidis_053442_chromosome_<>Neisseria_meningitidis_alpha14_chromosome_	RNA	-	1		Candidate_771_NC_011035(para)	-	5	RS	-
Candidate_713_NC_011035	|	NGK_2600		50S_ribosomal_protein_L31	*	>>>	75	|	2186858	2186955	>>>	97	|	533	>>>	NGK_2601	CadD	*	candidate	236	0.00069	F	12	Neisseria_gonorrhoeae_FA_1090_chromosome_<>Neisseria_meningitidis_MC58_chromosome_<>Neisseria_meningitidis_Z2491_chromosome_<>Streptococcus_agalactiae_NEM316_chromosome_<>Neisseria_meningitidis_FAM18_chromosome_<>Streptococcus_sanguinis_SK36_chromosome_<>Streptococcus_pyogenes_str._Manfredo_chromosome_<>Actinobacillus_succinogenes_130Z_chromosome_<>Neisseria_meningitidis_053442_chromosome_<>Strep…	RNA	-	50		Candidate_68_NC_011035(anti),Candidate_553_NC_011035(tandem),Candidate_650_NC_011035(para),Candidate_362_NC_011035(para),Candidate_590_NC_011035(para),Candidate_726_NC_011035(para),Candidate_733_NC_011035(para),Candidate_316_NC_011035(para),Candidate_710_NC_011035(para),Candidate_529_NC_011035(para),Candidate_699_NC_011035(para),Candidate_281_NC_011035(para),Candidate_282_NC_011035(para),Candidat…	-	-	-	-E.coli_sig70_2(8.07|-85)
Candidate_714_NC_011035	|	NGK_2607		hypothetical_protein	*	<<<	1	|	2191485	2191594	>>>	109	|	-46	<<<	NGK_2608	30S_ribosomal_protein_S21	*	candidate	316	5.1e-08	F	2	Neisseria_meningitidis_Z2491_chromosome_<>Neisseria_meningitidis_FAM18_chromosome_	RNA	-	1		Candidate_771_NC_011035(para)	-	-	-	-
Candidate_715_NC_011035	|	NGK_2608		30S_ribosomal_protein_S21	*	<<<	1	|	2191763	2192035	>>>	272	|	14	<<<	NGK_2609	putative_transglycosylase	*	candidate	1368	9.3e-56	F	6	Neisseria_gonorrhoeae_FA_1090_chromosome_<>Neisseria_meningitidis_MC58_chromosome_<>Neisseria_meningitidis_Z2491_chromosome_<>Neisseria_meningitidis_FAM18_chromosome_<>Neisseria_meningitidis_053442_chromosome_<>Neisseria_meningitidis_alpha14_chromosome_	RNA	-	5		Candidate_339_NC_011035(para),Candidate_340_NC_011035(para),Candidate_298_NC_011035(para),Candidate_540_NC_011035(para),Candidate_541_NC_011035(para)	-	-	-	-
Candidate_716_NC_011035	|	NGK_2618		hypothetical_protein	*	>>>	10	|	2198700	2198741	<<<	41	|	310	>>>	NGK_2619	AtpI	*	candidate	237	0.00047	X	4	Neisseria_meningitidis_Z2491_chromosome_<>Neisseria_meningitidis_FAM18_chromosome_<>Neisseria_meningitidis_053442_chromosome_<>Neisseria_meningitidis_alpha14_chromosome_	RNA	-	0		Candidate_557_NC_011035(anti)	-	-	-	-E.coli_sig70_1(7.08|-147)
Candidate_717_NC_011035	|	NGK_2627		F0F1_ATP_synthase_subunit_epsilon	*	>>>	13	|	2205972	2206129	<<<	157	|	0	>>>	NGK_2628	glycyl-tRNA_synthetase_subunit_alpha	*	candidate	309	3.3e-24	X	6	Neisseria_gonorrhoeae_FA_1090_chromosome_<>Neisseria_meningitidis_MC58_chromosome_<>Neisseria_meningitidis_Z2491_chromosome_<>Neisseria_meningitidis_FAM18_chromosome_<>Neisseria_meningitidis_053442_chromosome_<>Neisseria_meningitidis_alpha14_chromosome_	RNA	-	0		Candidate_558_NC_011035(anti)	-	-	-	-E.coli_sig70_3(9.15|-46)
Candidate_718_NC_011035	|	NGK_2639		Myo-inositol-1(Or_4)-monophosphatase	*	>>>	13	|	2216346	2216556	>>>	210	|	-4	<<<	NGK_2641	hypothetical_protein	*	candidate	850	3.1e-32	X	6	Neisseria_gonorrhoeae_FA_1090_chromosome_<>Neisseria_meningitidis_MC58_chromosome_<>Neisseria_meningitidis_Z2491_chromosome_<>Neisseria_meningitidis_FAM18_chromosome_<>Neisseria_meningitidis_053442_chromosome_<>Neisseria_meningitidis_alpha14_chromosome_	RNA	-	1		Candidate_771_NC_011035(para)	-	-	-	-
Candidate_719_NC_011035	|	NGK_2643		GMP_synthase	*	<<<	1	|	2219478	2219608	>>>	130	|	-33	<<<	NGK_2644	putative_ABC_transporter,_ATP-binding_protein	*	candidate	441	2e-13	X	6	Neisseria_gonorrhoeae_FA_1090_chromosome_<>Neisseria_meningitidis_MC58_chromosome_<>Neisseria_meningitidis_Z2491_chromosome_<>Neisseria_meningitidis_FAM18_chromosome_<>Neisseria_meningitidis_053442_chromosome_<>Neisseria_meningitidis_alpha14_chromosome_	-	-	1		Candidate_771_NC_011035(para)	-	-	-	-
Candidate_720_NC_011035	|	NGK_2644		putative_ABC_transporter,_ATP-binding_protein	*	<<<	1	|	2221446	2221573	>>>	127	|	9	<<<	NGK_2645	acyl-carrier-protein_S-malonyltransferase	*	candidate	645	8.8e-23	X	4	Neisseria_gonorrhoeae_FA_1090_chromosome_<>Neisseria_meningitidis_MC58_chromosome_<>Neisseria_meningitidis_Z2491_chromosome_<>Neisseria_meningitidis_alpha14_chromosome_	RNA	-	0	-	-	-	-	-	-
Candidate_721_NC_011035	|	NGK_2648		hypothetical_protein	*	<<<	126	|	2224272	2224507	>>>	235	|	-54	<<<	NGK_2649	hypothetical_protein	*	candidate	207	0.0032	F	6	Neisseria_gonorrhoeae_FA_1090_chromosome_<>Neisseria_meningitidis_MC58_chromosome_<>Neisseria_meningitidis_Z2491_chromosome_<>Neisseria_meningitidis_FAM18_chromosome_<>Neisseria_meningitidis_053442_chromosome_<>Neisseria_meningitidis_alpha14_chromosome_	RNA	-	1		Candidate_771_NC_011035(para)	-	-	-	-E.coli_sig70_2(8.58|-161)
Candidate_722_NC_011035	|	NGK_0288		hypothetical_protein	*	>>>	230	|	233938	234229	<<<	291	|	0	>>>	NGK_0289	putative_GntR-family_transcriptional_regulator	*	candidate	153	0.0036	F	6	Neisseria_gonorrhoeae_FA_1090_chromosome_<>Neisseria_meningitidis_MC58_chromosome_<>Neisseria_meningitidis_Z2491_chromosome_<>Neisseria_meningitidis_FAM18_chromosome_<>Neisseria_meningitidis_053442_chromosome_<>Neisseria_meningitidis_alpha14_chromosome_	RNA	-	33		Candidate_169_NC_011035(anti),Candidate_726_NC_011035(para),Candidate_325_NC_011035(para),Candidate_713_NC_011035(para),Candidate_733_NC_011035(para),Candidate_650_NC_011035(para),Candidate_529_NC_011035(para),Candidate_699_NC_011035(para),Candidate_362_NC_011035(para),Candidate_590_NC_011035(para),Candidate_789_NC_011035(para),Candidate_710_NC_011035(para),Candidate_316_NC_011035(para),Candidate…	-	-	-	-E.coli_sig70_1(7.26|-53)
Candidate_723_NC_011035	|	NGK_0317		hypothetical_protein	*	>>>	1	|	259623	259765	>>>	142	|	64	>>>	NGK_0318	preprotein_translocase_subunit_SecD	*	candidate	986	2.3e-38	F	6	Neisseria_gonorrhoeae_FA_1090_chromosome_<>Neisseria_meningitidis_MC58_chromosome_<>Neisseria_meningitidis_Z2491_chromosome_<>Neisseria_meningitidis_FAM18_chromosome_<>Neisseria_meningitidis_053442_chromosome_<>Neisseria_meningitidis_alpha14_chromosome_	-	-	0	-	-	-	5	-	-
Candidate_724_NC_011035	|	NGK_0319		preprotein_translocase_subunit_SecF	*	>>>	6	|	262632	262810	>>>	178	|	19	>>>	NGK_0320	30S_ribosomal_protein_S15	*	candidate	432	2.3e-13	F	5	Neisseria_gonorrhoeae_FA_1090_chromosome_<>Neisseria_meningitidis_MC58_chromosome_<>Neisseria_meningitidis_Z2491_chromosome_<>Neisseria_meningitidis_FAM18_chromosome_<>Neisseria_meningitidis_alpha14_chromosome_	RNA	-	1		Candidate_537_NC_011035(para)	-	5	RS	-
Candidate_725_NC_011035	|	NGK_0320		30S_ribosomal_protein_S15	*	>>>	1	|	263101	263237	>>>	136	|	3	>>>	NGK_0321	Spermidine/putrescine_ABC_transporter,_ATP-binding	*	candidate	390	1.7e-11	F	5	Neisseria_gonorrhoeae_FA_1090_chromosome_<>Neisseria_meningitidis_MC58_chromosome_<>Neisseria_meningitidis_Z2491_chromosome_<>Neisseria_meningitidis_FAM18_chromosome_<>Neisseria_meningitidis_053442_chromosome_	-	-	0	-	-	-	5	-	-
Candidate_726_NC_011035	|	NGK_0335		hypothetical_protein	*	<<<	116	|	277353	277427	<<<	74	|	44	>>>	NGK_0336	LolA	*	candidate	202	0.003	F	10	Neisseria_gonorrhoeae_FA_1090_chromosome_<>Neisseria_meningitidis_MC58_chromosome_<>Neisseria_meningitidis_Z2491_chromosome_<>Chromobacterium_violaceum_ATCC_12472_chromosome_<>Ralstonia_metallidurans_CH34_chromosome_1<>Neisseria_meningitidis_FAM18_chromosome_<>Actinobacillus_succinogenes_130Z_chromosome_<>Neisseria_meningitidis_053442_chromosome_<>Methylotenera_mobilis_JLW8_chromosome_<>Neisseria…	RNA	-	54		Candidate_713_NC_011035(para),Candidate_650_NC_011035(para),Candidate_362_NC_011035(para),Candidate_590_NC_011035(para),Candidate_733_NC_011035(para),Candidate_281_NC_011035(para),Candidate_282_NC_011035(para),Candidate_710_NC_011035(para),Candidate_529_NC_011035(para),Candidate_699_NC_011035(para),Candidate_316_NC_011035(para),Candidate_722_NC_011035(para),Candidate_412_NC_011035(para),Candidate…	-	-	-	-
Candidate_727_NC_011035	|	NGK_0341		peptide_chain_release_factor_3	*	<<<	11	|	283127	283221	<<<	94	|	0	<<<	NGK_0342	phosphoribosyl-AMP_cyclohydrolase	*	candidate	530	1.8e-17	F	6	Neisseria_gonorrhoeae_FA_1090_chromosome_<>Neisseria_meningitidis_MC58_chromosome_<>Neisseria_meningitidis_Z2491_chromosome_<>Neisseria_meningitidis_FAM18_chromosome_<>Neisseria_meningitidis_053442_chromosome_<>Neisseria_meningitidis_alpha14_chromosome_	-	-	0	-	-	-	5	-	-E.coli_sig70_2(8.94|-54)
Candidate_728_NC_011035	|	NGK_0003		DNA_polymerase_III_subunit_beta	*	>>>	1	|	2898	2966	>>>	68	|	78	<<<	NGK_0004	polyphosphate_kinase	*	candidate	282	4.6e-23	F	6	Neisseria_gonorrhoeae_FA_1090_chromosome_<>Neisseria_meningitidis_MC58_chromosome_<>Neisseria_meningitidis_Z2491_chromosome_<>Neisseria_meningitidis_FAM18_chromosome_<>Neisseria_meningitidis_053442_chromosome_<>Neisseria_meningitidis_alpha14_chromosome_	-	-	0	-	-	-	-	-	-
Candidate_729_NC_011035	|	NGK_0041		hypothetical_protein	*	<<<	62	|	29863	29972	>>>	109	|	14	<<<	NGK_0042	fructose-1,6-bisphosphate_aldolase	*	candidate	570	9.1e-20	F	4	Neisseria_gonorrhoeae_FA_1090_chromosome_<>Neisseria_meningitidis_Z2491_chromosome_<>Neisseria_meningitidis_FAM18_chromosome_<>Neisseria_meningitidis_053442_chromosome_	RNA	-	22		Candidate_342_NC_011035(para),Candidate_576_NC_011035(para),Candidate_577_NC_011035(para),Candidate_578_NC_011035(para),Candidate_611_NC_011035(para),Candidate_612_NC_011035(para),Candidate_373_NC_011035(para),Candidate_599_NC_011035(para),Candidate_16_NC_011035(para),Candidate_197_NC_011035(para),Candidate_621_NC_011035(para),Candidate_398_NC_011035(para),Candidate_335_NC_011035(para),Candidate_…	-	-	-	-
Candidate_730_NC_011035	|	NGK_0364		Ribonuclease,_putative	*	<<<	92	|	303441	303547	>>>	106	|	-53	<<<	NGK_0365	outer_membrane_protein	*	candidate	206	1.2e-18	F	6	Neisseria_gonorrhoeae_FA_1090_chromosome_<>Neisseria_meningitidis_MC58_chromosome_<>Neisseria_meningitidis_Z2491_chromosome_<>Neisseria_meningitidis_FAM18_chromosome_<>Neisseria_meningitidis_053442_chromosome_<>Neisseria_meningitidis_alpha14_chromosome_	RNA	-	1		Candidate_771_NC_011035(para)	-	-	-	-
Candidate_731_NC_011035	|	NGK_0374		Malate_oxidoreductase	*	>>>	11	|	313627	313673	<<<	46	|	96	>>>	NGK_0375	hypothetical_protein	*	candidate	276	9.9e-06	F	6	Neisseria_gonorrhoeae_FA_1090_chromosome_<>Neisseria_meningitidis_MC58_chromosome_<>Neisseria_meningitidis_Z2491_chromosome_<>Neisseria_meningitidis_FAM18_chromosome_<>Neisseria_meningitidis_053442_chromosome_<>Neisseria_meningitidis_alpha14_chromosome_	RNA	-	20		Candidate_183_NC_011035(anti),Candidate_621_NC_011035(para),Candidate_342_NC_011035(para),Candidate_576_NC_011035(para),Candidate_577_NC_011035(para),Candidate_427_NC_011035(para),Candidate_632_NC_011035(para),Candidate_221_NC_011035(para),Candidate_412_NC_011035(para),Candidate_373_NC_011035(para),Candidate_599_NC_011035(para),Candidate_540_NC_011035(para),Candidate_541_NC_011035(para),Candidate…	-	-	-	-E.coli_sig70_3(8.25|-95)
Candidate_732_NC_011035	|	NGK_0390		hypothetical_protein	*	<<<	-3	|	321944	322166	<<<	222	|	0	>>>	NGK_0391	putative_lipoprotein	*	candidate	102	0.0049	F	6	Neisseria_gonorrhoeae_FA_1090_chromosome_<>Neisseria_meningitidis_MC58_chromosome_<>Neisseria_meningitidis_Z2491_chromosome_<>Neisseria_meningitidis_FAM18_chromosome_<>Neisseria_meningitidis_053442_chromosome_<>Neisseria_meningitidis_alpha14_chromosome_	RNA	-	1		Candidate_771_NC_011035(para)	-	5	RS	-
Candidate_733_NC_011035	|	NGK_0402		hypothetical_protein	*	>>>	28	|	332091	332389	<<<	298	|	0	<<<	NGK_0403	N-(5_-phosphoribosyl)anthranilate_isomerase	*	candidate	108	0.0049	F	6	Neisseria_gonorrhoeae_FA_1090_chromosome_<>Neisseria_meningitidis_MC58_chromosome_<>Neisseria_meningitidis_Z2491_chromosome_<>Neisseria_meningitidis_FAM18_chromosome_<>Neisseria_meningitidis_053442_chromosome_<>Neisseria_meningitidis_alpha14_chromosome_	RNA	-	56		Candidate_125_NC_011035(para),Candidate_759_NC_011035(para),Candidate_677_NC_011035(para),Candidate_70_NC_011035(para),Candidate_650_NC_011035(para),Candidate_362_NC_011035(para),Candidate_590_NC_011035(para),Candidate_68_NC_011035(para),Candidate_553_NC_011035(para),Candidate_713_NC_011035(para),Candidate_529_NC_011035(para),Candidate_699_NC_011035(para),Candidate_726_NC_011035(para),Candidate_5…	-	-	-	-E.coli_sig70_3(9.21|-165)
Candidate_734_NC_011035	|	NGK_0440		hypothetical_protein	*	<<<	1	|	366133	366217	>>>	84	|	17	<<<	NGK_0441	ferrochelatase	*	candidate	488	7.9e-16	X	6	Neisseria_gonorrhoeae_FA_1090_chromosome_<>Neisseria_meningitidis_MC58_chromosome_<>Neisseria_meningitidis_Z2491_chromosome_<>Neisseria_meningitidis_FAM18_chromosome_<>Neisseria_meningitidis_053442_chromosome_<>Neisseria_meningitidis_alpha14_chromosome_	RNA	-	14		Candidate_365_NC_011035(para),Candidate_142_NC_011035(para),Candidate_569_NC_011035(para),Candidate_608_NC_011035(para),Candidate_611_NC_011035(para),Candidate_612_NC_011035(para),Candidate_523_NC_011035(para),Candidate_691_NC_011035(para),Candidate_373_NC_011035(para),Candidate_599_NC_011035(para),Candidate_667_NC_011035(para),Candidate_741_NC_011035(para),Candidate_514_NC_011035(para),Candidate…	-	-	-	-
Candidate_735_NC_011035	|	NGK_0053		hypothetical_protein	*	<<<	-3	|	38833	39094	<<<	261	|	0	<<<	NGK_0054	oligoribonuclease	*	candidate	103	0.0049	Y	6	Neisseria_gonorrhoeae_FA_1090_chromosome_<>Neisseria_meningitidis_MC58_chromosome_<>Neisseria_meningitidis_Z2491_chromosome_<>Neisseria_meningitidis_FAM18_chromosome_<>Neisseria_meningitidis_053442_chromosome_<>Neisseria_meningitidis_alpha14_chromosome_	RNA	-	1		Candidate_771_NC_011035(para)	-	5	RS	-
Candidate_736_NC_011035	|	NGK_trnaGlu1		tRNA-Glu	*	>>>	2	|	389495	389654	<<<	159	|	220	>>>	NGK_0468	hypothetical_protein	*	candidate	213	0.0027	X	11	Neisseria_gonorrhoeae_FA_1090_chromosome_<>Neisseria_meningitidis_MC58_chromosome_<>Neisseria_meningitidis_Z2491_chromosome_<>Methanosarcina_acetivorans_C2A_chromosome_<>Methanosarcina_mazei_Go1_chromosome_<>Neisseria_meningitidis_FAM18_chromosome_<>Roseiflexus_sp._RS-1_chromosome_<>Neisseria_meningitidis_053442_chromosome_<>Opitutus_terrae_PB90-1_chromosome_<>Neisseria_meningitidis_alpha14_chrom…	RNA	-	0		Candidate_195_NC_011035(anti),Candidate_196_NC_011035(anti)	-	-	-	-
Candidate_737_NC_011035	|	NGK_trnaGlu1		tRNA-Glu	*	>>>	2	|	389495	389789	>>>	294	|	85	>>>	NGK_0468	hypothetical_protein	*	candidate	243	4.8e-05	F	6	Neisseria_gonorrhoeae_FA_1090_chromosome_<>Neisseria_meningitidis_MC58_chromosome_<>Neisseria_meningitidis_Z2491_chromosome_<>Neisseria_meningitidis_FAM18_chromosome_<>Neisseria_meningitidis_053442_chromosome_<>Neisseria_meningitidis_alpha14_chromosome_	RNA	-	2		Candidate_195_NC_011035(tandem),Candidate_426_NC_011035(para)	-	-	RS	-
Candidate_738_NC_011035	|	NGK_0469		hypothetical_protein	*	<<<	51	|	391692	391735	<<<	43	|	0	>>>	NGK_0470	hypothetical_protein	*	candidate	430	5.2e-13	F	6	Neisseria_gonorrhoeae_FA_1090_chromosome_<>Neisseria_meningitidis_MC58_chromosome_<>Neisseria_meningitidis_Z2491_chromosome_<>Neisseria_meningitidis_FAM18_chromosome_<>Neisseria_meningitidis_053442_chromosome_<>Neisseria_meningitidis_alpha14_chromosome_	-	-	0	-	-	-	-	-	-E.coli_sig70_3(8.07|-43)
Candidate_739_NC_011035	|	NGK_0480		putative_D-alanyl-D-alanine-endopeptidase	*	<<<	172	|	396851	396972	>>>	121	|	26	>>>	NGK_0481	Bacterioferritin_comigratory_protein	*	candidate	745	2.5e-27	X	6	Neisseria_gonorrhoeae_FA_1090_chromosome_<>Neisseria_meningitidis_MC58_chromosome_<>Neisseria_meningitidis_Z2491_chromosome_<>Neisseria_meningitidis_FAM18_chromosome_<>Neisseria_meningitidis_053442_chromosome_<>Neisseria_meningitidis_alpha14_chromosome_	-	-	1		Candidate_11_NC_011035(tandem)	-	5	-	-E.coli_sig70_3(8.80|-46)
Candidate_740_NC_011035	|	NGK_0485		Thioredoxin	*	>>>	-2	|	399136	399268	<<<	132	|	239	<<<	NGK_0486	putative_reductase	*	candidate	577	1.1e-19	Z	5	Neisseria_gonorrhoeae_FA_1090_chromosome_<>Neisseria_meningitidis_Z2491_chromosome_<>Neisseria_meningitidis_FAM18_chromosome_<>Neisseria_meningitidis_053442_chromosome_<>Neisseria_meningitidis_alpha14_chromosome_	-	-	1		Candidate_771_NC_011035(para)	-	-	-	-E.coli_sig70_2(8.01|-215)
Candidate_741_NC_011035	|	NGK_0499		hypothetical_protein	*	>>>	1	|	409203	409378	>>>	175	|	22	<<<	NGK_0500	Lep	*	candidate	95	0.0045	X	6	Neisseria_gonorrhoeae_FA_1090_chromosome_<>Neisseria_meningitidis_MC58_chromosome_<>Neisseria_meningitidis_Z2491_chromosome_<>Neisseria_meningitidis_FAM18_chromosome_<>Neisseria_meningitidis_053442_chromosome_<>Neisseria_meningitidis_alpha14_chromosome_	RNA	-	40		Candidate_713_NC_011035(para),Candidate_316_NC_011035(para),Candidate_317_NC_011035(para),Candidate_325_NC_011035(para),Candidate_281_NC_011035(para),Candidate_789_NC_011035(para),Candidate_726_NC_011035(para),Candidate_546_NC_011035(para),Candidate_650_NC_011035(para),Candidate_722_NC_011035(para),Candidate_362_NC_011035(para),Candidate_590_NC_011035(para),Candidate_733_NC_011035(para),Candidate…	-	-	-	-
Candidate_742_NC_011035	|	NGK_0056		acetyl-CoA_carboxylase,_biotin_carboxylase	*	<<<	1	|	42030	42193	>>>	163	|	-52	<<<	NGK_0057	acetyl-CoA_carboxylase_biotin_carboxyl_carrier_pro	*	candidate	471	7.8e-15	F	6	Neisseria_gonorrhoeae_FA_1090_chromosome_<>Neisseria_meningitidis_MC58_chromosome_<>Neisseria_meningitidis_Z2491_chromosome_<>Neisseria_meningitidis_FAM18_chromosome_<>Neisseria_meningitidis_053442_chromosome_<>Neisseria_meningitidis_alpha14_chromosome_	-	-	1		Candidate_771_NC_011035(para)	-	-	-	-
Candidate_743_NC_011035	|	NGK_0555		multidrug_efflux_protein	*	<<<	84	|	460292	460373	<<<	81	|	0	<<<	NGK_0556	transcriptional_regulatory_protein	*	candidate	724	9.8e-27	F	4	Neisseria_meningitidis_Z2491_chromosome_<>Neisseria_meningitidis_FAM18_chromosome_<>Neisseria_meningitidis_053442_chromosome_<>Neisseria_meningitidis_alpha14_chromosome_	-	-	1		Candidate_208_NC_011035(tandem)	-	-	-	-
Candidate_744_NC_011035	|	NGK_0562		adenylate_kinase	*	>>>	103	|	465137	465495	>>>	358	|	61	>>>	NGK_0563	orotidine_5_-phosphate_decarboxylase	*	candidate	228	0.0026	F	7	Neisseria_gonorrhoeae_FA_1090_chromosome_<>Neisseria_meningitidis_MC58_chromosome_<>Neisseria_meningitidis_Z2491_chromosome_<>Neisseria_meningitidis_FAM18_chromosome_<>Shewanella_putrefaciens_CN-32_chromosome_<>Neisseria_meningitidis_053442_chromosome_<>Neisseria_meningitidis_alpha14_chromosome_	RNA	-	51		Candidate_407_NC_011035(para),Candidate_527_NC_011035(para),Candidate_615_NC_011035(para),Candidate_622_NC_011035(para),Candidate_623_NC_011035(para),Candidate_693_NC_011035(para),Candidate_376_NC_011035(para),Candidate_603_NC_011035(para),Candidate_464_NC_011035(para),Candidate_478_NC_011035(para),Candidate_672_NC_011035(para),Candidate_702_NC_011035(para),Candidate_676_NC_011035(para),Candidate…	-	5	RS	-
Candidate_745_NC_011035	|	NGK_0572		Type_I_restriction-modification_system_specificity	*	>>>	-3	|	472344	472466	<<<	122	|	110	>>>	NGK_0573	putative_type_I_site-specific_deoxyribonuclease	*	candidate	203	0.0047	F	7	Neisseria_gonorrhoeae_FA_1090_chromosome_<>Neisseria_meningitidis_MC58_chromosome_<>Neisseria_meningitidis_Z2491_chromosome_<>Neisseria_meningitidis_FAM18_chromosome_<>Neisseria_meningitidis_053442_chromosome_<>Methylotenera_mobilis_JLW8_chromosome_<>Neisseria_meningitidis_alpha14_chromosome_	RNA	-	1		Candidate_771_NC_011035(para)	-	-	-	-
Candidate_746_NC_011035	|	NGK_0576		cold-shock_domain_family_protein	*	>>>	27	|	478786	479056	<<<	270	|	0	<<<	NGK_0577	PmbA_protein	*	candidate	1379	2.9e-56	Z	6	Neisseria_gonorrhoeae_FA_1090_chromosome_<>Neisseria_meningitidis_MC58_chromosome_<>Neisseria_meningitidis_Z2491_chromosome_<>Neisseria_meningitidis_FAM18_chromosome_<>Neisseria_meningitidis_053442_chromosome_<>Neisseria_meningitidis_alpha14_chromosome_	RNA	-	0		Candidate_214_NC_011035(anti)	-	-	-	-
Candidate_747_NC_011035	|	NGK_0592		GTP-binding_protein_EngA	*	<<<	1	|	492473	492553	>>>	80	|	67	<<<	NGK_0593	Gc_protein	*	candidate	673	4.4e-24	X	5	Neisseria_gonorrhoeae_FA_1090_chromosome_<>Neisseria_meningitidis_MC58_chromosome_<>Neisseria_meningitidis_Z2491_chromosome_<>Neisseria_meningitidis_FAM18_chromosome_<>Neisseria_meningitidis_alpha14_chromosome_	RNA	-	0	-	-	-	-	-	-
Candidate_748_NC_011035	|	NGK_0596		hypothetical_protein	*	<<<	2	|	495333	495378	>>>	45	|	7	<<<	NGK_0597	hypothetical_protein	*	candidate	261	4.9e-05	F	4	Neisseria_gonorrhoeae_FA_1090_chromosome_<>Neisseria_meningitidis_Z2491_chromosome_<>Neisseria_meningitidis_FAM18_chromosome_<>Neisseria_meningitidis_alpha14_chromosome_	RNA	-	0	-	-	-	-	-	-
Candidate_749_NC_011035	|	NGK_0599		hypothetical_protein	*	<<<	1305	|	497464	497683	<<<	219	|	21	<<<	NGK_0600	hypothetical_protein	*	candidate	143	0.0047	Y	6	Neisseria_gonorrhoeae_FA_1090_chromosome_<>Neisseria_meningitidis_MC58_chromosome_<>Neisseria_meningitidis_Z2491_chromosome_<>Neisseria_meningitidis_FAM18_chromosome_<>Neisseria_meningitidis_053442_chromosome_<>Neisseria_meningitidis_alpha14_chromosome_	-	-	53		Candidate_217_NC_011035(tandem),Candidate_218_NC_011035(tandem),Candidate_764_NC_011035(para),Candidate_685_NC_011035(para),Candidate_478_NC_011035(para),Candidate_672_NC_011035(para),Candidate_3_NC_011035(para),Candidate_603_NC_011035(para),Candidate_153_NC_011035(para),Candidate_640_NC_011035(para),Candidate_781_NC_011035(para),Candidate_785_NC_011035(para),Candidate_693_NC_011035(para),Candida…	-	-	-	-E.coli_sig70_1(7.41|-174)
Candidate_750_NC_011035	|	NGK_0607		pantoate--beta-alanine_ligase	*	>>>	2	|	503276	503501	>>>	225	|	92	>>>	NGK_0608	putative_periplasmic_protein	*	candidate	206	0.003	Z	6	Neisseria_gonorrhoeae_FA_1090_chromosome_<>Neisseria_meningitidis_MC58_chromosome_<>Neisseria_meningitidis_Z2491_chromosome_<>Neisseria_meningitidis_FAM18_chromosome_<>Neisseria_meningitidis_053442_chromosome_<>Neisseria_meningitidis_alpha14_chromosome_	RNA	-	8		Candidate_420_NC_011035(para),Candidate_155_NC_011035(para),Candidate_156_NC_011035(para),Candidate_306_NC_011035(para),Candidate_307_NC_011035(para),Candidate_526_NC_011035(para),Candidate_446_NC_011035(para),Candidate_447_NC_011035(para)	-	-	RS	-
Candidate_751_NC_011035	|	NGK_0617		sulfate_ABC_transporter,_permease_protein	*	<<<	1	|	514994	515047	>>>	53	|	195	>>>	NGK_0618	hypothetical_protein	*	candidate	1241	1.2e-50	F	1	Neisseria_gonorrhoeae_FA_1090_chromosome_	-	-	0	-	-	-	-	-	-
Candidate_752_NC_011035	|	NGK_0622		replicative_DNA_helicase	*	>>>	183	|	518978	519040	<<<	62	|	284	>>>	NGK_0623	hypothetical_protein	*	candidate	123	0.0049	F	6	Neisseria_gonorrhoeae_FA_1090_chromosome_<>Neisseria_meningitidis_MC58_chromosome_<>Neisseria_meningitidis_Z2491_chromosome_<>Neisseria_meningitidis_FAM18_chromosome_<>Neisseria_meningitidis_053442_chromosome_<>Neisseria_meningitidis_alpha14_chromosome_	-	-	0	-	-	-	-	-	-
Candidate_753_NC_011035	|	NGK_0067		carbamoyl_phosphate_synthase_small_subunit	*	<<<	23	|	51924	52009	<<<	85	|	0	<<<	NGK_0068	hypothetical_protein	*	candidate	527	1.6e-17	Y	6	Neisseria_gonorrhoeae_FA_1090_chromosome_<>Neisseria_meningitidis_MC58_chromosome_<>Neisseria_meningitidis_Z2491_chromosome_<>Neisseria_meningitidis_FAM18_chromosome_<>Neisseria_meningitidis_053442_chromosome_<>Neisseria_meningitidis_alpha14_chromosome_	-	-	0	-	-	-	5	-	-E.coli_sig70_2(9.87|-71)
Candidate_754_NC_011035	|	NGK_0632		succinyldiaminopimelate_transaminase	*	>>>	5	|	525350	525499	<<<	149	|	0	>>>	NGK_0633	hypothetical_protein	*	candidate	225	0.00042	F	6	Neisseria_gonorrhoeae_FA_1090_chromosome_<>Neisseria_meningitidis_MC58_chromosome_<>Neisseria_meningitidis_Z2491_chromosome_<>Neisseria_meningitidis_FAM18_chromosome_<>Neisseria_meningitidis_053442_chromosome_<>Neisseria_meningitidis_alpha14_chromosome_	COD	-	2		Candidate_228_NC_011035(anti),Candidate_477_NC_011035(para),Candidate_660_NC_011035(para)	-	-	-	-E.coli_sig70_1(10.04|-58)
Candidate_755_NC_011035	|	NGK_trnaSer3		tRNA-Ser	*	>>>	-1	|	526618	526666	<<<	48	|	60	>>>	NGK_0634	hypothetical_protein	*	candidate	212	0.0022	X	5	Neisseria_gonorrhoeae_FA_1090_chromosome_<>Neisseria_meningitidis_MC58_chromosome_<>Neisseria_meningitidis_Z2491_chromosome_<>Neisseria_meningitidis_FAM18_chromosome_<>Neisseria_meningitidis_alpha14_chromosome_	-	-	1		Candidate_771_NC_011035(para)	-	-	-	-
Candidate_756_NC_011035	|	NGK_0635		Putative_Phage_integrase	*	>>>	1	|	528011	528099	>>>	88	|	265	<<<	NGK_0637	putative_phage_associated_protein	*	candidate	1766	8e-74	Z	1	Neisseria_gonorrhoeae_FA_1090_chromosome_	RNA	-	0		Candidate_230_NC_011035(anti)	-	-	-	-
Candidate_758_NC_011035	|	NGK_0647		putative_phage_associated_protein	*	<<<	132	|	534190	534251	<<<	61	|	3	<<<	NGK_0648	putative_phage_associated_protein	*	candidate	111	0.0007	Z	2	Neisseria_gonorrhoeae_FA_1090_chromosome_<>Actinobacillus_pleuropneumoniae_serovar_7_str._AP76_chromosome_	RNA	-	0	-	-	-	3	-	-
Candidate_759_NC_011035	|	NGK_0072		hypothetical_protein	*	>>>	83	|	53485	53519	>>>	34	|	77	>>>	NGK_0073	hypothetical_protein	*	candidate	105	0.00081	F	32	Neisseria_gonorrhoeae_FA_1090_chromosome_<>Coxiella_burnetii_RSA_493_chromosome_<>Rickettsia_conorii_str._Malish_7_chromosome_<>Neisseria_meningitidis_MC58_chromosome_<>Neisseria_meningitidis_Z2491_chromosome_<>Rickettsia_felis_URRWXCal2_chromosome_<>Chlorobium_chlorochromatii_CaD3_chromosome_<>Erythrobacter_litoralis_HTCC2594_chromosome_<>Rickettsia_bellii_RML369-C_chromosome_<>Shewanella_sp._W3…	RNA	-	28		Candidate_125_NC_011035(tandem),Candidate_677_NC_011035(para),Candidate_733_NC_011035(para),Candidate_527_NC_011035(para),Candidate_696_NC_011035(para),Candidate_766_NC_011035(para),Candidate_615_NC_011035(para),Candidate_636_NC_011035(para),Candidate_602_NC_011035(para),Candidate_399_NC_011035(para),Candidate_691_NC_011035(para),Candidate_407_NC_011035(para),Candidate_28_NC_011035(para),Candidat…	-	5	RS	-
Candidate_760_NC_011035	|	NGK_0669		putative_phage_associated_protein	*	>>>	32	|	547915	547962	>>>	47	|	156	>>>	NGK_0670	putative_phage_associated_protein	*	candidate	229	0.00027	Z	2	Neisseria_meningitidis_MC58_chromosome_<>Neisseria_meningitidis_FAM18_chromosome_	-	-	3		Candidate_102_NC_011035(anti),Candidate_232_NC_011035(tandem),Candidate_342_NC_011035(para),Candidate_576_NC_011035(para),Candidate_578_NC_011035(para)	-	-	-	-
Candidate_761_NC_011035	|	NGK_0679		putative_phage_associated_protein	*	<<<	1	|	561262	561366	>>>	104	|	53	<<<	NGK_0680	hypothetical_protein	*	candidate	795	1.3e-29	X	1	Neisseria_gonorrhoeae_FA_1090_chromosome_	RNA	-	0		Candidate_233_NC_011035(anti)	-	-	-	-
Candidate_762_NC_011035	|	NGK_0680		hypothetical_protein	*	<<<	1	|	561589	561666	>>>	77	|	154	>>>	NGK_0681	hypothetical_protein	*	candidate	682	4.9e-25	F	3	Neisseria_gonorrhoeae_FA_1090_chromosome_<>Neisseria_meningitidis_Z2491_chromosome_<>Neisseria_meningitidis_053442_chromosome_	RNA	-	0	-	-	-	-	-	-E.coli_sig70_2(7.33|-38)
Candidate_763_NC_011035	|	NGK_0680		hypothetical_protein	*	<<<	1	|	561589	561780	>>>	191	|	40	>>>	NGK_0681	hypothetical_protein	*	candidate	682	4.9e-25	X	3	Neisseria_gonorrhoeae_FA_1090_chromosome_<>Neisseria_meningitidis_Z2491_chromosome_<>Neisseria_meningitidis_053442_chromosome_	RNA	-	0	-	-	-	5	-	-E.coli_sig70_2(7.33|-152)
Candidate_764_NC_011035	|	NGK_0684		hypothetical_protein	*	<<<	1	|	562851	563036	>>>	185	|	109	<<<	NGK_0685	putative_isocitrate_dehydrogenase	*	candidate	106	0.0047	F	6	Neisseria_gonorrhoeae_FA_1090_chromosome_<>Neisseria_meningitidis_MC58_chromosome_<>Neisseria_meningitidis_Z2491_chromosome_<>Neisseria_meningitidis_FAM18_chromosome_<>Neisseria_meningitidis_053442_chromosome_<>Neisseria_meningitidis_alpha14_chromosome_	RNA	-	48		Candidate_749_NC_011035(para),Candidate_685_NC_011035(para),Candidate_603_NC_011035(para),Candidate_703_NC_011035(para),Candidate_3_NC_011035(para),Candidate_478_NC_011035(para),Candidate_672_NC_011035(para),Candidate_527_NC_011035(para),Candidate_661_NC_011035(para),Candidate_464_NC_011035(para),Candidate_153_NC_011035(para),Candidate_551_NC_011035(para),Candidate_552_NC_011035(para),Candidate_7…	-	-	-	-
Candidate_765_NC_011035	|	NGK_0684		hypothetical_protein	*	<<<	1	|	562851	563136	>>>	285	|	9	<<<	NGK_0685	putative_isocitrate_dehydrogenase	*	candidate	106	0.0047	F	6	Neisseria_gonorrhoeae_FA_1090_chromosome_<>Neisseria_meningitidis_MC58_chromosome_<>Neisseria_meningitidis_Z2491_chromosome_<>Neisseria_meningitidis_FAM18_chromosome_<>Neisseria_meningitidis_053442_chromosome_<>Neisseria_meningitidis_alpha14_chromosome_	RNA	-	49		Candidate_749_NC_011035(para),Candidate_685_NC_011035(para),Candidate_603_NC_011035(para),Candidate_703_NC_011035(para),Candidate_3_NC_011035(para),Candidate_478_NC_011035(para),Candidate_672_NC_011035(para),Candidate_527_NC_011035(para),Candidate_661_NC_011035(para),Candidate_464_NC_011035(para),Candidate_153_NC_011035(para),Candidate_551_NC_011035(para),Candidate_552_NC_011035(para),Candidate_7…	-	-	-	-
Candidate_766_NC_011035	|	NGK_0690		putative_acyl-CoA_hydrolase	*	<<<	326	|	569325	569360	>>>	35	|	93	>>>	NGK_0691	hypothetical_protein	*	candidate	122	0.0017	F	19	Neisseria_gonorrhoeae_FA_1090_chromosome_<>Coxiella_burnetii_RSA_493_chromosome_<>Rickettsia_conorii_str._Malish_7_chromosome_<>Neisseria_meningitidis_MC58_chromosome_<>Neisseria_meningitidis_Z2491_chromosome_<>Neisseria_meningitidis_FAM18_chromosome_<>Polaromonas_naphthalenivorans_CJ2_chromosome_<>Shewanella_putrefaciens_CN-32_chromosome_<>Bradyrhizobium_sp._ORS278_chromosome_<>Sphingomonas_witt…	RNA	-	8		Candidate_538_NC_011035(para),Candidate_399_NC_011035(para),Candidate_125_NC_011035(para),Candidate_759_NC_011035(para),Candidate_637_NC_011035(para),Candidate_677_NC_011035(para),Candidate_733_NC_011035(para),Candidate_602_NC_011035(para)	-	-	RS	-
Candidate_767_NC_011035	|	NGK_0694		hypothetical_protein	*	<<<	-36	|	570735	571004	<<<	269	|	0	<<<	NGK_0695	putative_serotype-1-specific_antigen	*	candidate	208	0.0036	F	6	Neisseria_gonorrhoeae_FA_1090_chromosome_<>Neisseria_meningitidis_MC58_chromosome_<>Neisseria_meningitidis_Z2491_chromosome_<>Neisseria_meningitidis_FAM18_chromosome_<>Neisseria_meningitidis_053442_chromosome_<>Neisseria_meningitidis_alpha14_chromosome_	RNA	-	1		Candidate_771_NC_011035(para)	-	5	RS	-
Candidate_768_NC_011035	|	NGK_0726		hypothetical_protein	*	<<<	88	|	596649	596713	<<<	64	|	89	<<<	NGK_0727	putative_acyl-CoA_hydrolase	*	candidate	216	0.00081	X	5	Neisseria_gonorrhoeae_FA_1090_chromosome_<>Neisseria_meningitidis_MC58_chromosome_<>Neisseria_meningitidis_FAM18_chromosome_<>Neisseria_meningitidis_053442_chromosome_<>Neisseria_meningitidis_alpha14_chromosome_	RNA	-	0	-	-	-	-	-	-
Candidate_769_NC_011035	|	NGK_0727		putative_acyl-CoA_hydrolase	*	<<<	2	|	597288	597437	>>>	149	|	0	<<<	NGK_0728	hypothetical_protein	*	candidate	710	9.2e-26	X	5	Neisseria_gonorrhoeae_FA_1090_chromosome_<>Neisseria_meningitidis_Z2491_chromosome_<>Neisseria_meningitidis_FAM18_chromosome_<>Neisseria_meningitidis_053442_chromosome_<>Neisseria_meningitidis_alpha14_chromosome_	-	-	5		Candidate_393_NC_011035(para),Candidate_403_NC_011035(para),Candidate_469_NC_011035(para),Candidate_529_NC_011035(para),Candidate_243_NC_011035(para)	-	-	-	-
Candidate_771_NC_011035	|	ORIG		-------	*	|	1	|	2	67	>>>	65	|	139	>>>	NGK_0001	chromosomal_replication_initiation_protein	*	candidate	677	1.5e-24	F	6	Neisseria_gonorrhoeae_FA_1090_chromosome_<>Neisseria_meningitidis_MC58_chromosome_<>Neisseria_meningitidis_Z2491_chromosome_<>Neisseria_meningitidis_FAM18_chromosome_<>Neisseria_meningitidis_053442_chromosome_<>Neisseria_meningitidis_alpha14_chromosome_	RNA	-	0	-	-	-	-	-	-(|-67)
Candidate_772_NC_011035	|	NGK_0768		putative_DNA_polymerase_III_subunit	*	>>>	1	|	627540	627653	>>>	113	|	-46	>>>	NGK_0769	hypothetical_protein	*	candidate	327	1.3e-08	X	6	Neisseria_gonorrhoeae_FA_1090_chromosome_<>Neisseria_meningitidis_MC58_chromosome_<>Neisseria_meningitidis_Z2491_chromosome_<>Neisseria_meningitidis_FAM18_chromosome_<>Neisseria_meningitidis_053442_chromosome_<>Neisseria_meningitidis_alpha14_chromosome_	RNA	-	1		Candidate_771_NC_011035(para)	-	5	RS	-
Candidate_773_NC_011035	|	NGK_0775		Putative_phage_repressor,_putative_phage_associate	*	>>>	-2	|	631678	631765	<<<	87	|	147	>>>	NGK_0776	putative_phage_associated_protein	*	candidate	311	3.8e-08	X	4	Neisseria_gonorrhoeae_FA_1090_chromosome_<>Neisseria_meningitidis_Z2491_chromosome_<>Neisseria_meningitidis_FAM18_chromosome_<>Neisseria_meningitidis_053442_chromosome_	-	-	1		Candidate_771_NC_011035(para)	-	-	-	-
Candidate_774_NC_011035	|	NGK_0782		putative_phage_associated_protein	*	>>>	1	|	634863	635070	>>>	207	|	58	>>>	NGK_0783	putative_phage_associated_protein	*	candidate	104	0.0049	F	6	Neisseria_gonorrhoeae_FA_1090_chromosome_<>Neisseria_meningitidis_MC58_chromosome_<>Neisseria_meningitidis_Z2491_chromosome_<>Neisseria_meningitidis_FAM18_chromosome_<>Neisseria_meningitidis_053442_chromosome_<>Neisseria_meningitidis_alpha14_chromosome_	RNA	-	51		Candidate_785_NC_011035(para),Candidate_781_NC_011035(para),Candidate_676_NC_011035(para),Candidate_702_NC_011035(para),Candidate_640_NC_011035(para),Candidate_693_NC_011035(para),Candidate_622_NC_011035(para),Candidate_623_NC_011035(para),Candidate_749_NC_011035(para),Candidate_478_NC_011035(para),Candidate_672_NC_011035(para),Candidate_551_NC_011035(para),Candidate_552_NC_011035(para),Candidate…	-	5	RS	-
Candidate_775_NC_011035	|	NGK_0795		H.8_outer_membrane_protein	*	>>>	13	|	649331	649391	<<<	60	|	20	>>>	NGK_0796	hypothetical_protein	*	candidate	347	4.8e-09	X	6	Neisseria_gonorrhoeae_FA_1090_chromosome_<>Neisseria_meningitidis_MC58_chromosome_<>Neisseria_meningitidis_Z2491_chromosome_<>Neisseria_meningitidis_FAM18_chromosome_<>Neisseria_meningitidis_053442_chromosome_<>Neisseria_meningitidis_alpha14_chromosome_	RNA	-	0		Candidate_246_NC_011035(anti)	-	-	-	-
Candidate_776_NC_011035	|	NGK_0807		putative_virulence_associated_protein	*	>>>	16	|	659031	659132	<<<	101	|	210	<<<	NGK_0808	Oxidoreductase,_putative	*	candidate	227	0.0014	Z	8	Haemophilus_influenzae_Rd_KW20_chromosome_<>Neisseria_gonorrhoeae_FA_1090_chromosome_<>Neisseria_meningitidis_MC58_chromosome_<>Neisseria_meningitidis_Z2491_chromosome_<>Haemophilus_influenzae_86-028NP_chromosome_<>Neisseria_meningitidis_FAM18_chromosome_<>Haemophilus_influenzae_PittGG_chromosome_<>Neisseria_meningitidis_alpha14_chromosome_	RNA	-	0		Candidate_249_NC_011035(anti)	-	-	-	-
Candidate_777_NC_011035	|	NGK_0827		Thermonuclease_family_protein	*	>>>	1	|	672885	673049	>>>	164	|	12	>>>	NGK_0828	Amino_acid_ABC_transporter,_permease_protein	*	candidate	881	1.5e-33	Z	6	Neisseria_gonorrhoeae_FA_1090_chromosome_<>Neisseria_meningitidis_MC58_chromosome_<>Neisseria_meningitidis_Z2491_chromosome_<>Neisseria_meningitidis_FAM18_chromosome_<>Neisseria_meningitidis_053442_chromosome_<>Neisseria_meningitidis_alpha14_chromosome_	RNA	-	0	-	-	-	5	-	-
Candidate_778_NC_011035	|	NGK_0831		hypothetical_protein	*	<<<	409	|	676128	676169	>>>	41	|	65	<<<	NGK_0832	arginyl-tRNA_synthetase	*	candidate	294	9.2e-07	X	6	Neisseria_gonorrhoeae_FA_1090_chromosome_<>Neisseria_meningitidis_MC58_chromosome_<>Neisseria_meningitidis_Z2491_chromosome_<>Neisseria_meningitidis_FAM18_chromosome_<>Neisseria_meningitidis_053442_chromosome_<>Neisseria_meningitidis_alpha14_chromosome_	-	-	1		Candidate_251_NC_011035(opp)	-	-	-	-
Candidate_779_NC_011035	|	NGK_0870		5,10-methylenetetrahydrofolate_reductase	*	>>>	3	|	704475	704605	<<<	130	|	52	>>>	NGK_0871	5-methyltetrahydropteroyltriglutamate--homocystein	*	candidate	575	1.3e-19	F	6	Neisseria_gonorrhoeae_FA_1090_chromosome_<>Neisseria_meningitidis_MC58_chromosome_<>Neisseria_meningitidis_Z2491_chromosome_<>Neisseria_meningitidis_FAM18_chromosome_<>Neisseria_meningitidis_053442_chromosome_<>Neisseria_meningitidis_alpha14_chromosome_	-	-	0	-	-	-	-	-	-
Candidate_780_NC_011035	|	NGK_0889		hypothetical_protein	*	<<<	1	|	723502	723714	>>>	212	|	-54	<<<	NGK_0890	putative_transposase	*	candidate	199	0.0047	F	6	Neisseria_gonorrhoeae_FA_1090_chromosome_<>Neisseria_meningitidis_MC58_chromosome_<>Neisseria_meningitidis_Z2491_chromosome_<>Neisseria_meningitidis_FAM18_chromosome_<>Neisseria_meningitidis_053442_chromosome_<>Neisseria_meningitidis_alpha14_chromosome_	RNA	-	1		Candidate_771_NC_011035(para)	-	-	-	-E.coli_sig70_1(7.95|-226)
[truncated: 34 more rows]

## Sheet: ST 2 FA1090 ncRNAs
Table S2. SIPHT predicted small non-coding RNAs in Neisseria gonorrhoeae strain FA1090.
[truncated: 1,126 more rows]

[truncated: 25 more sheets: ST 3 MC58 ncRNAs, ST 4 Z2491 ncRNAs, ST 5 FAM18 ncRNAs, ST 6 alpha14 ncRNAs, ST 7 53442 ncRNAs, ST 8 N.lactamica ncRNAs, ST 9 NCCP11945 CREE, ST 10 FA1090 CREE, ST 11 MC58 CREE, ST 12 Z2491 CREE, ST 13 FAM18 CREE, ST 14 alpha14 CREE, ST 15 53442 CREE, ST 16 N.lactamica CREE, ST 17 NCCP11945 CREE & ncRNAs, ST 18 FA1090 CREE & ncRNAs, ST 19 MC58 CREE & ncRNAs, ST 20 Z2941 CREE & ncRNAs, ST 21 FAM18 CREE & ncRNAs, ST 22 alpha14 CREE & ncRNAs …]
